# Supplementary material for: A combined experimental and theoretical study on the reactivity of nitrenes and nitrene radical anions
Source: PubMed Central journal article supplement (PMC8748618; doi:10.1038/s41467-021-27687-6), 2022-01-10
Supplement: 41467_2021_27687_MOESM1_ESM.pdf [file 41467_2021_27687_MOESM1_ESM.pdf]

# Supplementary Information

## A combined experimental and theoretical study on the reactivity of nitrenes and nitrene radical anions

Yujing Guo, Chao Pei and Rene M. Koenigs\*

### Table of Contents

|                          |      |
|--------------------------|------|
| General Information      | S1   |
| UV-Vis Experiments       | S2   |
| Reaction Optimization    | S3   |
| Control Experiments      | S4   |
| General Procedures       | S7   |
| Physical Data            | S8   |
| DFT Calculations         | S50  |
| Spectra                  | S78  |
| Supplementary References | S180 |

## General Information

Unless otherwise noted, all commercially available compounds were used as provided without further purification. Chemicals used in this manuscript were purchased from Sigma Aldrich, Alfa Aesar, Fluorochem and Carl Roth. Solvents used in reactions were p.A. grade. Solvents for chromatography were technical grade and distilled prior to use. Analytical thin-layer chromatography (TLC) was performed on Macherey-Nagel silica gel aluminium plates with F-254 indicator, visualised by irradiation with UV light. Column chromatography was performed using silica gel Merck 60 (particle size 0.063 – 0.2 mm). Solvent mixtures are understood as volume/volume.

<sup>1</sup>H-NMR, <sup>19</sup>F-NMR and <sup>13</sup>C-NMR were recorded on a Varian AV600/AV400 or an Agilent DD2 400 NMR spectrometer in CDCl<sub>3</sub>. Data are reported in the following order: chemical shift ( $\delta$ ) in ppm; multiplicities are indicated br (broadened singlet), s (singlet), d (doublet), t (triplet), q (quartet), m (multiplet); coupling constants ( $J$ ) are in Hertz (Hz).

HRMS data were recorded on a ThermoFisher Scientific LTQ Orbitrap XL using ESI ionization or on a Finnigan MAT 95 using EI ionization at 70 eV.

IR spectra were recorded on a Perkin Elmer-100 spectrometer and are reported in terms of frequency of absorption (cm<sup>-1</sup>).

UV-Vis spectra were recorded on a Shimadzu UV-2600 UV-VIS spectrophotometer.

Elemental analysis was performed on an Elementar VarioEL instrument.

Iodines used in this manuscript were synthesized according to the literature procedure.<sup>[1,2]</sup>

LEDs used in this manuscript were purchased from Conrad Electronics.

High Power LED-Module, 3 W, 30 lm, 30 °, 470 nm, art.nr. 180745 – 62.

Reactions were irradiated from 5 cm, temperature was set to ambient and cooling was realized with a fan.

## UV-Vis Experiments

Compounds **A-C** and **E** were measured in a 0.02 M solution in methanol at room temperature, compound **D** was measured in a 0.01 M solution in methanol at room temperature. All spectra were directly recorded after setting up the solutions.

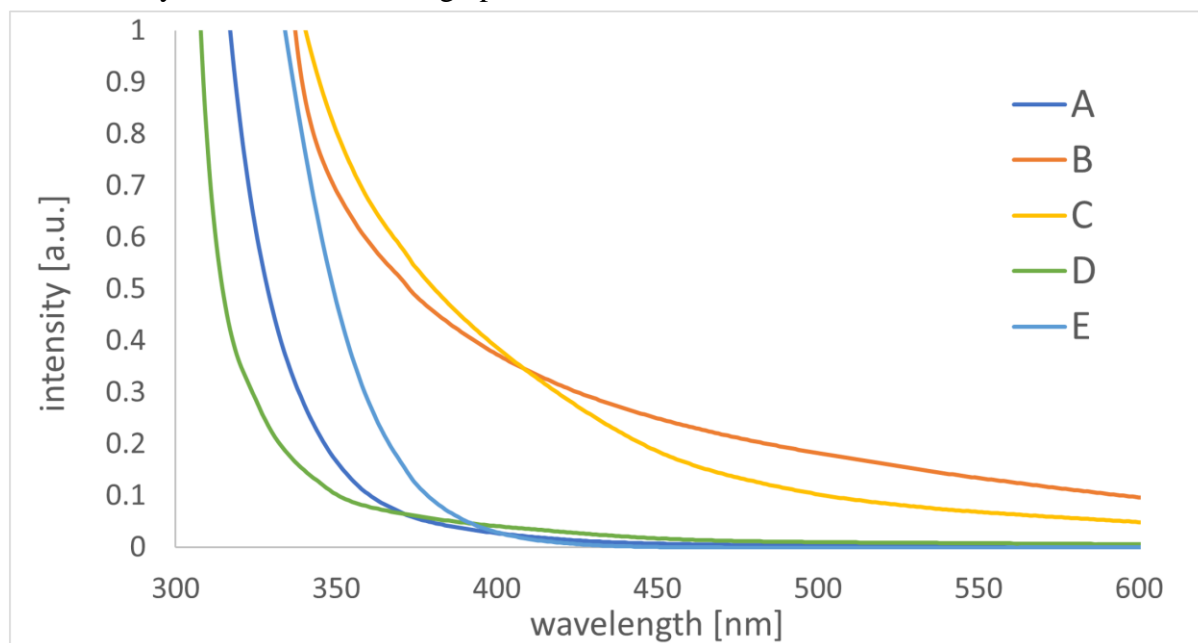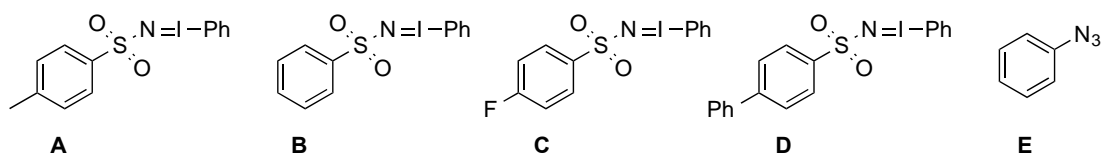

**Supplementary Figure 1.** UV-Vis spectra of different iodonanes and phenylazide as reference.

## Reaction Optimization

Supplementary Table 1. Reaction Optimization.<sup>[a]</sup>

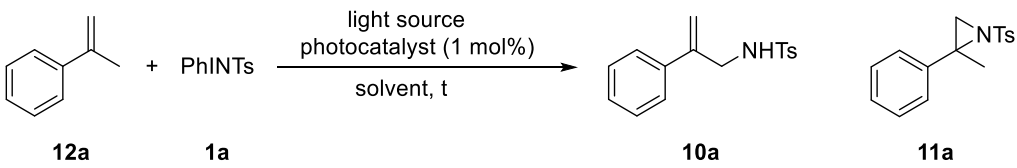

| entry             | light       | Photocatalyst                                                     | solvent                         | 12a:1a | % Yield (10a) / (11a) |
|-------------------|-------------|-------------------------------------------------------------------|---------------------------------|--------|-----------------------|
| 1                 | 385 nm      | -                                                                 | DCM                             | 5 : 1  | 22 / -                |
| 2                 | 470 nm      | -                                                                 | DCM                             | 5 : 1  | 70 / -                |
| 3                 | 530 nm      | -                                                                 | DCM                             | 5 : 1  | 40 / -                |
| 4                 | white light | -                                                                 | DCM                             | 5 : 1  | 29 / -                |
| 5                 | in the dark | -                                                                 | DCM                             | 5 : 1  | n.r. / -              |
| 6                 | 470 nm      | Ru(bpy) <sub>3</sub> Cl <sub>2</sub> •6H <sub>2</sub> O           | DCM                             | 5 : 1  | - / 80                |
| 7                 | 470 nm      | 4-CzIPN                                                           | DCM                             | 5 : 1  | 51 / -                |
| 8                 | 470 nm      | Ir(ppy) <sub>3</sub>                                              | DCM                             | 5 : 1  | 27 / -                |
| 9                 | 470 nm      | Ru(bpz) <sub>3</sub> (PF <sub>6</sub> ) <sub>2</sub>              | DCM                             | 5 : 1  | 35 / -                |
| 10                | 470 nm      | (Ir[(dF(CF <sub>3</sub> )ppy] <sub>2</sub> (dtbpy)PF <sub>6</sub> | DCM                             | 5 : 1  | 30 / -                |
| 11                | 470 nm      | Eosin Y                                                           | DCM                             | 5 : 1  | 34 / 45               |
| 12                | 470 nm      | Ru(bpy) <sub>3</sub> Cl <sub>2</sub> •6H <sub>2</sub> O           | DCM                             | 10 : 1 | - / 81                |
| 13                | 470 nm      | Ru(bpy) <sub>3</sub> Cl <sub>2</sub> •6H <sub>2</sub> O           | DCM                             | 3 : 1  | - / 71                |
| 14                | 470 nm      | Ru(bpy) <sub>3</sub> Cl <sub>2</sub> •6H <sub>2</sub> O           | DCE                             | 5 : 1  | - / 69                |
| 15                | 470 nm      | Ru(bpy) <sub>3</sub> Cl <sub>2</sub> •6H <sub>2</sub> O           | CHCl <sub>3</sub>               | 5 : 1  | - / 66                |
| 16                | 470 nm      | Ru(bpy) <sub>3</sub> Cl <sub>2</sub> •6H <sub>2</sub> O           | EA                              | 5 : 1  | - / 20                |
| 17                | 470 nm      | Ru(bpy) <sub>3</sub> Cl <sub>2</sub> •6H <sub>2</sub> O           | THF                             | 5 : 1  | - / 30                |
| 18                | 470 nm      | Ru(bpy) <sub>3</sub> Cl <sub>2</sub> •6H <sub>2</sub> O           | CH <sub>3</sub> NO <sub>2</sub> | 5 : 1  | - / n.r.              |
| 19                | 470 nm      | Ru(bpy) <sub>3</sub> Cl <sub>2</sub> •6H <sub>2</sub> O           | MeCN                            | 5 : 1  | - / 61                |
| 20 <sup>[b]</sup> | 470 nm      | Ru(bpy) <sub>3</sub> Cl <sub>2</sub> •6H <sub>2</sub> O           | DCM                             | 5 : 1  | - / 80                |
| 21 <sup>[c]</sup> | 470 nm      | Ru(bpy) <sub>3</sub> Cl <sub>2</sub> •6H <sub>2</sub> O           | DCM                             | 5 : 1  | - / 80                |
| 22 <sup>[d]</sup> | 470 nm      | Ru(bpy) <sub>3</sub> Cl <sub>2</sub> •6H <sub>2</sub> O           | DCM                             | 5 : 1  | - / 72                |

<sup>[a]</sup>Reaction conditions:  $\alpha$ -methyl styrene **12a**, iminoiodinane **1a** and the respective photocatalyst (1 mol%) were dissolved in 2.0 mL Solvent under air atmosphere. The mixture was irradiated with the light source indicated at room temperature. n.r. = no reaction. <sup>[b]</sup>8 h; <sup>[c]</sup>4 h; <sup>[d]</sup>2 h.

## Control experiments

**Supplementary Table 2. Control experiments of photochemical reactions<sup>[a]</sup>**

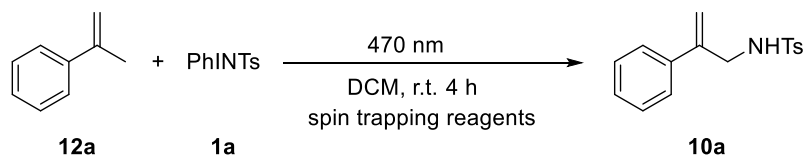

| spin trapping reagents             | %yield (10a)     |
|------------------------------------|------------------|
| 1 equiv of 4-nitrotoluene          | 59               |
| 1 equiv of 4-methyl anisole        | 43               |
| 1 equiv of triethylamine / DABCO   | n.r. / n.r.      |
| 1 equiv of dihydropyridine         | 15               |
| 1 equiv of MeOH / H <sub>2</sub> O | 66 / 45          |
| 0.1 / 0.5 / 1.0 equiv of TEMPO     | 40 / n.r. / n.r. |
| 1.0 equiv of DMPO / DNP            | n.r. / n.r.      |

<sup>[a]</sup>Reaction conditions: **12a** (1 mmol, 5 eq.), **1a** (0.2 mmol) and spin trapping reagents in 2.0 mL DCM under air atmosphere. The mixture was irradiated with the light source indicated for 4 h at room temperature. n.r. = no reaction. Dihydropyridine = Diethyl 1,4-dihydro-2,6-dimethyl-3,5-pyridinedi-carboxylate. TEMPO = (2,2,6,6-Tetramethylpiperidin-1-yl)oxyl. DMPO = 5,5-Dimethyl-1-pyrrolin-N-oxid. DNP = 2,4-Dinitrophenol.

**Supplementary Table 3. Control experiments of photocatalytic reactions<sup>[a]</sup>**

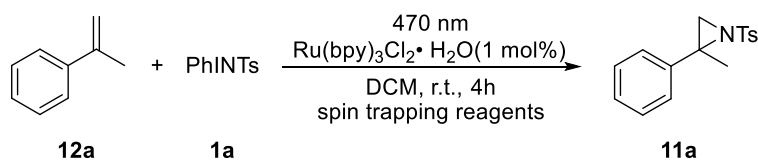

| spin trapping reagents             | %yield (11a)   |
|------------------------------------|----------------|
| 1 equiv of 4-nitrotoluene          | 71             |
| 1 equiv of 4-methyl anisole        | 65             |
| 1 equiv of triethylamine / DABCO   | 18 / n.r.      |
| 1 equiv of dihydropyridine         | 10             |
| 1 equiv of MeOH / H <sub>2</sub> O | 64 / 67        |
| 0.1 / 0.5 / 1.0 equiv of TEMPO     | 51 / 25 / n.r. |
| 1.0 equiv of DMPO / DNP            | n.r. / n.r.    |

<sup>[a]</sup>Reaction conditions: **12a** (1 mmol, 5 eq.), **1a** (0.2 mmol), Ru(bpy)<sub>3</sub>Cl<sub>2</sub>·H<sub>2</sub>O (1 mol%) and spin trapping reagents in 2.0 mL DCM under air atmosphere. The mixture was irradiated with the light source indicated for 4 h at room temperature. n.r. = no reaction. Dihydropyridine = Diethyl 1,4-dihydro-2,6-dimethyl-3,5-pyridinedi-carboxylate. TEMPO = (2,2,6,6-Tetramethylpiperidin-1-yl)oxyl. DMPO = 5,5-Dimethyl-1-pyrrolin-N-oxid. DNP = 2,4-Dinitrophenol.

## KIE Experiments

### KIE experiment (intermolecular competition)

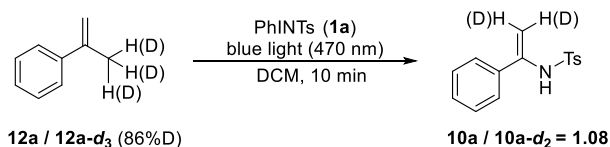

Intermolecular competition experiment:  $\alpha$ -Methylstyrene **12a-d<sub>3</sub>** (86% D) (0.588 mmol, 71.1 mg), **12a** (0.412 mmol, 48.6 mg) and **1a** were added to an oven-dried tube (10 mL), equipped with a magnetic stirring bar, DCM (2.0 mL) was added. The reaction is stirred and irradiated with a 3 W LED lamp (5 cm distance) for 10min. A cooling fan is used to maintain room temperature (25-28 °C). The crude product was obtained after short column chromatography using *n*-hexane / EtOAc as eluent. The ratio of **10a/10a-d<sub>2</sub>** = 1.08 was determined obtained.

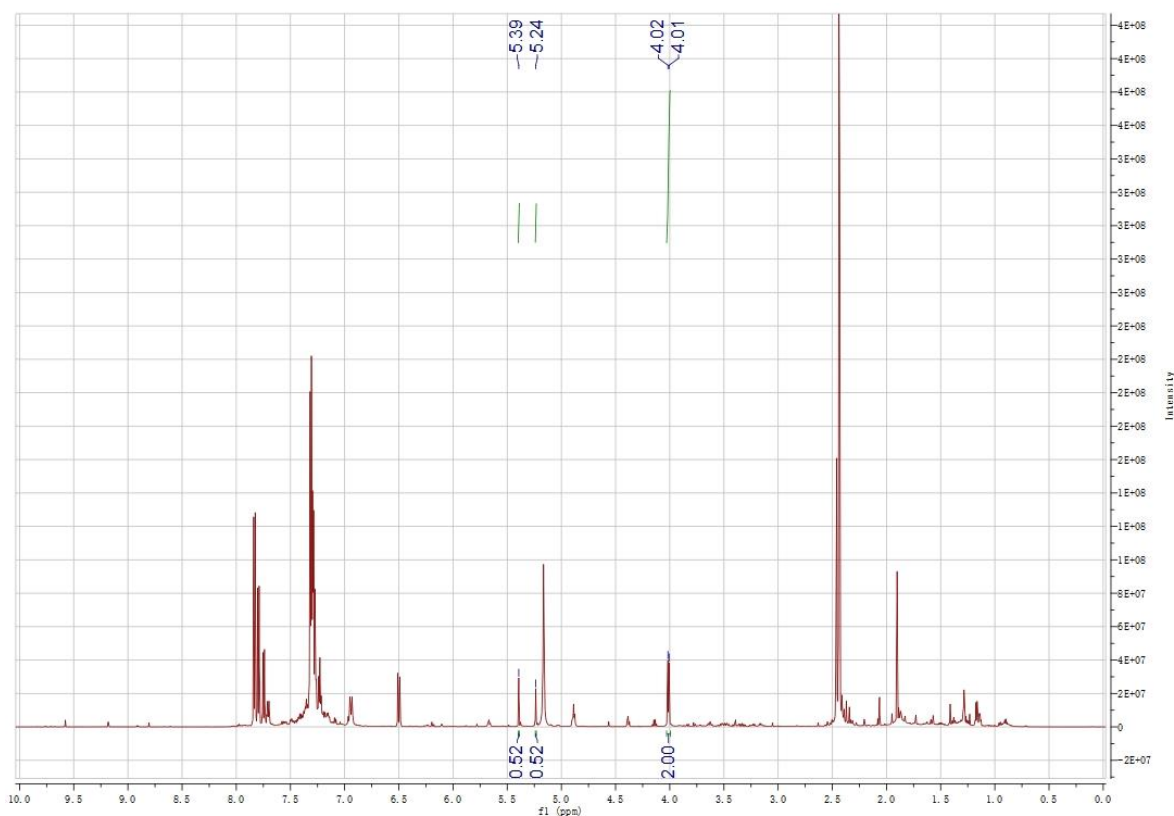

**Supplementary Figure 2.** The crude NMR of intermolecular competition experiment

### KIE experiment (parallel experiments)

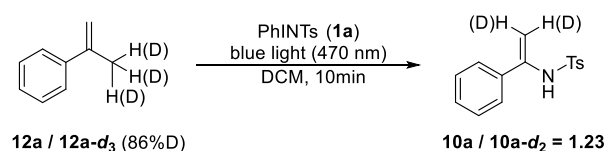

Parallel experiments:  $\alpha$ -Methylstyrene **12a** (1.0 mmol, 118.1 mg) and **1a** were added to an oven-dried tube (10 mL), equipped with a magnetic stirring bar, DCM (2.0 mL) was added. In another reaction vessel, **12a-d<sub>3</sub>** (86% D) (1.0 mmol, 121.1 mg) was used instead of **12a**. The two reactions are stirred and irradiated with a 3 W LED lamp (5 cm distance) for 10min. A cooling fan is used to maintain room temperature (25-28 °C). The solvent was removed in vacuo to leave a crude mixture. The ratio of **10a/10a-d<sub>2</sub>** = 1.23 was determined by <sup>1</sup>H NMR using mesitylene (14  $\mu$ L) as the internal standard and going through mathematical conversion.

### KIE experiment (reaction kinetics)

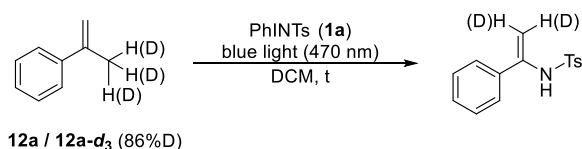

$\alpha$ -Methylstyrene **12a** (1.0 mmol, 118.1 mg) and **1a** were added to an oven-dried tube (10 mL), equipped with a magnetic stirring bar, DCM (2.0 mL) was added. In another reaction vessel, **12a-d<sub>3</sub>** (86% D) (1.0 mmol, 121.1 mg) was used instead of **12a**. The reactions are stirred and irradiated with a 3 W LED lamp (5 cm distance) for 2 min, 4min, 6 min, 8min, 10min. A cooling fan is used to maintain room temperature (25-28 °C). The solvent was removed in vacuo to leave a crude mixture. The yield was determined by <sup>1</sup>H NMR using mesitylene (14  $\mu$ L) as the internal standard and going through mathematical conversion.

| t (min) \ Yield (%)      | 2  | 4  | 6  | 8  | 10 |
|--------------------------|----|----|----|----|----|
| <b>10a</b>               | 10 | 16 | 21 | 27 | 32 |
| <b>10a-d<sub>2</sub></b> | 5  | 10 | 15 | 22 | 26 |

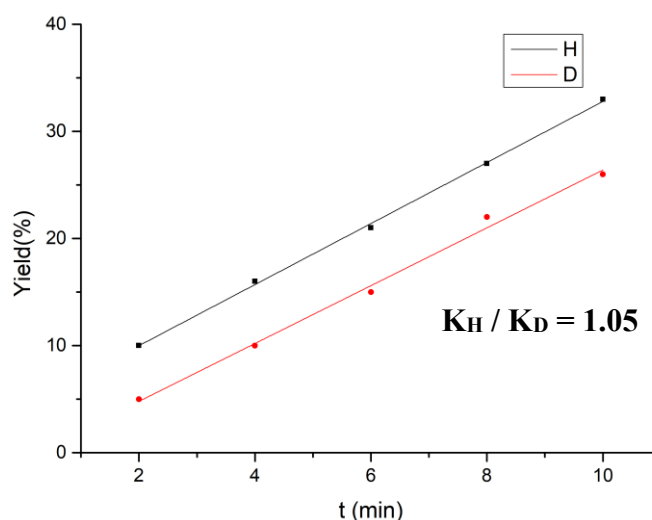

**Supplementary Figure 3.** KIE experiment (reaction kinetics)

## General Procedures

### Procedure for synthesis of iminoiodinane (1a)

Compound **1a** was prepared according to the literature procedure.<sup>1,2</sup> *p*-Toluenesulphonamide (10.26 g), potassium hydroxide (8.40 g) and methanol (240 ml) were stirred in a flask in an ice bath. Iodobenzene diacetate (19.20 g) was added to the stirred mixture and the resulting solution was stirred at room temperature overnight. Pour into a large excess of iced water to the reaction mixture and stirred for 1 h. A light yellow coloured solid precipitated on standing overnight. The solid was isolated by filtration. Several portions of ether were used to wash the solid. The solid was recrystallization in methanol. Yield = 65%.

### General Procedure for Photochemical reactions – GP1

In an oven-dried tube (10 mL), equipped with a magnetic stirring bar, iminoiodinane (0.2 mmol, 1.0 eq.) and alkene (5.0 eq.) are dissolved in 2 mL DCM under air atmosphere. The reaction is stirred and irradiated with a 3 W LED lamp (5 cm distance) for 4 h. A cooling fan is used to maintain room temperature (25-28 °C). The product was obtained after column chromatography using *n*-hexane / EtOAc as eluent.

### General Procedure for Photocatalytic reactions – GP2

In an oven-dried tube (10 mL), equipped with a magnetic stirring bar, iminoiodinane (0.2 mmol, 1.0 eq.), alkene (5.0 eq.), and catalyst (1 mol%) are dissolved in 2 mL DCM under air atmosphere. The reaction is stirred and irradiated with a 3 W LED lamp (5 cm distance) for 4 h. A cooling fan is used to maintain room temperature (25-28 °C). The product was obtained after column chromatography using *n*-hexane / EtOAc as eluent.



## Physical Data

### *N*-(4-Methylphenylsulfonyl)imino-phenyl- $\lambda$ 3-iodane (**1a**)

$^1\text{H NMR}$  (400 MHz, DMSO- $d_6$ ):  $\delta$  = 7.67 – 7.61 (m, 2H), 7.48 – 7.38 (m, 3H), 7.26 (t,  $J$  = 7.8 Hz, 2H), 7.02 (d,  $J$  = 7.9 Hz, 2H), 2.23 (s, 3H) ppm.

$^{13}\text{C NMR}$  (101 MHz, DMSO- $d_6$ ):  $\delta$  = 142.6, 140.5, 133.6, 130.8, 130.5, 129.0, 126.5, 117.6, 21.2 ppm.

**elemental analysis**: calcd (%) for  $\text{C}_{13}\text{H}_{12}\text{INO}_2\text{S}$ : C 41.84, H 3.24, N 3.75; found: C 41.71, H 3.25, N 3.69.

### 4-Methyl-*N*-(2-phenylallyl)benzenesulfonamide (**10a**)

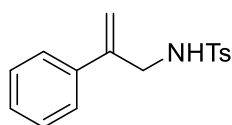

Compound **10a** was prepared according to the general procedure **GP1** and was obtained after column chromatography (*n*-hexane : ethyl acetate 4:1→1:1) as a colorless oil in 70% yield (40 mg).

$^1\text{H NMR}$  (400 MHz,  $\text{CDCl}_3$ ):  $\delta$  = 7.70 (d,  $J$  = 8.3 Hz, 2H), 7.31 – 7.25 (m, 5H), 7.24 – 7.19 (m, 2H), 5.36 (d,  $J$  = 0.4 Hz, 1H), 5.19 (d,  $J$  = 0.6 Hz, 1H), 4.42 (t,  $J$  = 6.0 Hz, 1H), 4.09 – 3.85 (m, 2H), 2.43 (s, 3H) ppm.

$^{13}\text{C NMR}$  (101 MHz,  $\text{CDCl}_3$ ):  $\delta$  = 143.4, 142.8, 137.7, 136.6, 129.6, 128.5, 128.1, 127.2, 126.0, 115.1, 47.0, 21.5 ppm.

**HRMS** (ESI): mass found: 288.10504, calculated mass for  $\text{C}_{16}\text{H}_{18}\text{NO}_2\text{S}^+$ : 288.10528.

**IR** (KBr): 3512, 3282, 3059, 2927, 2864, 2317, 2166, 1971, 1916, 1811, 1727, 1598, 1495, 1446, 1328, 1157, 1087, 1028, 978, 904, 814, 763, 699, 667  $\text{cm}^{-1}$ .

### 4-Methyl-*N*-(2-phenylallyl-3,3- $d_2$ )benzenesulfonamide (**10a- $d_2$** )

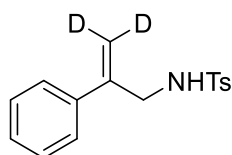

Compound **10a- $d_2$**  was prepared according to the general procedure **GP1** and was obtained after column chromatography (*n*-hexane : ethyl acetate 4:1→1:1) as a colorless oil in 70% yield (40 mg), deuterium content: 86%.

$^1\text{H NMR}$  (600 MHz,  $\text{CDCl}_3$ ):  $\delta$  = 7.74 (d,  $J$  = 8.2 Hz, 2H), 7.35 – 7.29 (m, 5H), 7.26 (dd,  $J$  = 6.8, 3.0 Hz, 2H), 5.39 (d,  $J$  = 8.7 Hz, 0.14H), 5.22 (d,  $J$  = 8.4 Hz, 0.14H), 4.48 (s, 1H), 4.03 (d,  $J$  = 6.2 Hz, 2H), 2.47 (s, 3H) ppm.

$^{13}\text{C NMR}$  (151 MHz,  $\text{CDCl}_3$ ):  $\delta$  = 143.5, 142.7, 137.7, 136.7, 129.7, 128.5, 128.2, 127.2, 126.0, 122.9, 46.9, 21.5 ppm.

**HRMS** (ESI): mass found: 290.11750, calculated mass for  $\text{C}_{16}\text{H}_{16}\text{D}_2\text{NO}_2\text{S}^+$ : 290.11783.

**IR** (KBr): 3558, 3509, 3282, 3058, 2921, 2867, 2682, 2328, 2194, 2164, 2078, 2028, 1911, 1731, 1597, 1495, 1444, 1326, 1157, 1091, 814, 763, 732, 697, 666  $\text{cm}^{-1}$ .

#### 4-Methyl-*N*-(2-(*p*-tolyl)allyl)benzenesulfonamide (**10b**)

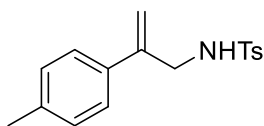

Compound **10b** was prepared according to the general procedure **GP1** and was obtained after column chromatography (*n*-hexane : ethyl acetate 9:1→4:1) as a colorless oil in 57% yield (34 mg).

**<sup>1</sup>H NMR** (600 MHz,  $\text{CDCl}_3$ ):  $\delta$  = 7.73 (d,  $J$  = 8.0 Hz, 2H), 7.31 (d,  $J$  = 8.0 Hz, 2H), 7.14 (d,  $J$  = 7.8 Hz, 2H), 7.10 (d,  $J$  = 8.0 Hz, 2H), 5.35 (s, 1H), 5.16 (s, 1H), 4.41 (t,  $J$  = 6.2 Hz, 1H), 3.99 (d,  $J$  = 6.1 Hz, 2H), 2.46 (s, 3H), 2.35 (s, 3H) ppm.

**<sup>13</sup>C NMR** (151 MHz,  $\text{CDCl}_3$ ):  $\delta$  = 143.5, 142.6, 138.1, 136.7, 134.8, 129.6, 129.2, 127.2, 125.9, 114.3, 47.1, 21.5, 21.1 ppm.

**HRMS** (ESI): Mass found: 302.12135, calculated mass for  $\text{C}_{17}\text{H}_{20}\text{NO}_2\text{S}^+$ : 302.12093.

**IR** (KBr): 3510, 3283, 2925, 2866, 2732, 2161, 2032, 1912, 1726, 1679, 1600, 1513, 1449, 1407, 1329, 1158, 1088, 976, 901, 814, 762, 707, 665  $\text{cm}^{-1}$ .

#### *N*-(2-(4-Butylphenyl)allyl)-4-methylbenzenesulfonamide (**10c**)

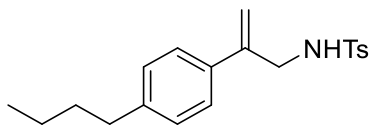

Compound **10c** was prepared according to the general procedure **GP1** and was obtained after column chromatography (*n*-hexane : ethyl acetate 9:1→4:1) as a colorless oil in 52% yield (36 mg).

**<sup>1</sup>H NMR** (600 MHz,  $\text{CDCl}_3$ ):  $\delta$  = 7.84 – 7.69 (m, 2H), 7.32 (d,  $J$  = 7.9 Hz, 2H), 7.19 – 7.16 (m, 2H), 7.12 (d,  $J$  = 8.3 Hz, 2H), 5.37 (s, 1H), 5.17 (d,  $J$  = 0.7 Hz, 1H), 4.48 (t,  $J$  = 6.0 Hz, 1H), 4.01 (dd,  $J$  = 6.2, 0.4 Hz, 2H), 2.61 (dd,  $J$  = 9.5, 6.0 Hz, 2H), 2.47 (s, 3H), 1.69 – 1.44 (m, 2H), 1.44 – 1.28 (m, 2H), 0.96 (t,  $J$  = 7.4 Hz, 3H) ppm.

**<sup>13</sup>C NMR** (151 MHz,  $\text{CDCl}_3$ ):  $\delta$  = 143.4, 143.1, 142.6, 136.7, 135.0, 129.6, 128.6, 127.2, 125.9, 114.3, 47.0, 35.2, 33.5, 22.3, 21.5, 13.9 ppm.

**HRMS** (ESI): mass found: 344.16822, calculated mass for  $\text{C}_{20}\text{H}_{26}\text{NO}_2\text{S}^+$ : 344.16788.

**IR** (KBr): 3866, 3524, 3272, 3029, 2927, 2861, 2678, 2478, 2321, 2083, 1996, 1910, 1805, 1731, 1678, 1598, 1512, 1456, 1405, 1314, 1239, 1137, 1085, 1046, 1019, 896, 814, 774, 708, 671  $\text{cm}^{-1}$ .

#### *N*-(2-(4-Fluorophenyl)allyl)-4-methylbenzenesulfonamide (**10d**)

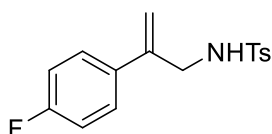

Compound **10d** was prepared according to the general procedure **GP1** and was obtained after column chromatography (*n*-hexane : ethyl acetate 9:1→4:1) as a white solid in 62% yield (38 mg).

**<sup>1</sup>H NMR** (600 MHz, Chloroform-*d*):  $\delta$  = 7.64 (d, *J* = 8.0 Hz, 2H), 7.23 (d, *J* = 8.0 Hz, 2H), 7.16 (dd, *J* = 8.5, 5.4 Hz, 2H), 6.90 (t, *J* = 8.5 Hz, 2H), 5.26 (s, 1H), 5.12 (s, 1H), 4.37 (t, *J* = 6.3 Hz, 1H), 3.90 (d, *J* = 6.3 Hz, 2H), 2.38 (s, 3H) ppm.

**<sup>13</sup>C NMR** (151 MHz, CDCl<sub>3</sub>):  $\delta$  = 162.6 (d, *J* = 247.2 Hz), 143.6, 141.9, 136.7, 133.8 (d, *J* = 3.3 Hz), 129.7, 127.8 (d, *J* = 7.8 Hz), 127.2, 115.4 (d, *J* = 21.8 Hz), 115.2, 47.2, 21.5 ppm.

**<sup>19</sup>F NMR** (565 MHz, CDCl<sub>3</sub>):  $\delta$  = -113.61 – -113.76 ppm.

**HRMS** (ESI): mass found: 306.09707, calculated mass for C<sub>16</sub>H<sub>17</sub>NFO<sub>2</sub>S<sup>+</sup>: 306.09586.

**IR** (KBr): 3514, 3284, 3069, 2928, 2869, 2733, 2161, 2029, 1978, 1898, 1726, 1600, 1509, 1452, 1327, 1229, 1157, 1090, 1014, 976, 910, 836, 816, 766, 665 cm<sup>-1</sup>.

#### ***N*-(2-(4-Chlorophenyl)allyl)-4-methylbenzenesulfonamide (10e)**

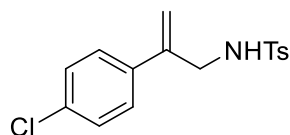

Compound **10e** was prepared according to the general procedure **GP1** and was obtained after column chromatography (*n*-hexane : ethyl acetate 9:1→4:1) as a colorless oil in 53% yield (34 mg).

**<sup>1</sup>H NMR** (600 MHz, CDCl<sub>3</sub>):  $\delta$  = 7.72 (d, *J* = 7.9 Hz, 2H), 7.31 (d, *J* = 8.0 Hz, 2H), 7.27 – 7.23 (m, 2H), 7.19 (d, *J* = 8.3 Hz, 2H), 5.39 (s, 1H), 5.24 (s, 1H), 4.44 (t, *J* = 6.4 Hz, 1H), 3.98 (d, *J* = 6.3 Hz, 2H), 2.46 (s, 3H) ppm.

**<sup>13</sup>C NMR** (151 MHz, CDCl<sub>3</sub>):  $\delta$  = 143.6, 141.9, 136.7, 136.2, 134.1, 129.7, 128.7, 127.4, 127.2, 115.8, 47.0, 21.5 ppm.

**HRMS** (ESI): Mass found: 344.04806, calculated mass for C<sub>16</sub>H<sub>16</sub>ClNNaO<sub>2</sub>S<sup>+</sup>: 344.04825.

**IR** (KBr): 3852, 3507, 3254, 3063, 2865, 2672, 2324, 2159, 1981, 1924, 1843, 1732, 1630, 1595, 1492, 1427, 1398, 1323, 1224, 1158, 1089, 1011, 889, 832, 729, 765, 729, 706, 664 cm<sup>-1</sup>.

#### ***N*-(2-(4-Bromophenyl)allyl)-4-methylbenzenesulfonamide (10f)**

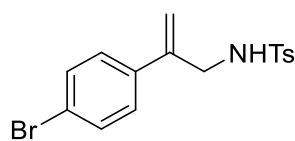

Compound **10f** was prepared according to the general procedure **GP1** and was obtained after column chromatography (*n*-hexane : ethyl acetate 9:1→4:1) as a white solid in 53% yield (39 mg).

**<sup>1</sup>H NMR** (400 MHz, CDCl<sub>3</sub>):  $\delta$  = 7.68 (d, *J* = 8.2 Hz, 2H), 7.38 (d, *J* = 8.5 Hz, 2H), 7.28 (d, *J* = 8.0 Hz, 2H), 7.10 (d, *J* = 8.6 Hz, 2H), 5.36 (s, 1H), 5.21 (s, 1H), 4.45 (t, *J* = 6.1 Hz, 1H), 3.95 (d, *J* = 6.3 Hz, 2H), 2.43 (s, 3H) ppm.

**<sup>13</sup>C NMR** (101 MHz, CDCl<sub>3</sub>):  $\delta$  = 143.6, 141.9, 136.6, 131.5, 129.6, 127.6, 127.1, 122.2, 115.9, 114.9, 46.9, 21.5 ppm.

**HRMS** (ESI): mass found: 366.01623, calculated mass for C<sub>16</sub>H<sub>17</sub>BrNO<sub>2</sub>S<sup>+</sup>: 366.01579.

**IR** (KBr): 3851, 3511, 3259, 3060, 2924, 2863, 2663, 2321, 2161, 2013, 1911, 1849, 1722, 1683, 1633, 1590, 1489, 1427, 1396, 1324, 1156, 1073, 1006, 919, 891, 819, 736, 705, 662  $\text{cm}^{-1}$ .

***N*-(2-(4-Methoxyphenyl)allyl)-4-methylbenzenesulfonamide (10g)**

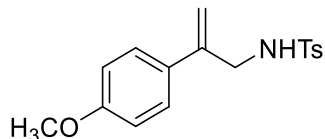

Compound **10g** was prepared according to the general procedure **GP1** and was obtained after column chromatography (*n*-hexane : ethyl acetate 9:1→4:1) as a colorless oil in 49% yield (31 mg).

**<sup>1</sup>H NMR** (600 MHz,  $\text{CDCl}_3$ ):  $\delta$  = 7.76 – 7.69 (m, 2H), 7.31 (d,  $J$  = 7.8 Hz, 2H), 7.21 – 7.18 (m, 2H), 6.85 – 6.80 (m, 2H), 5.30 (s, 1H), 5.11 (s, 1H), 4.40 (t,  $J$  = 6.1 Hz, 1H), 3.98 (d,  $J$  = 6.2 Hz, 2H), 3.81 (s, 3H), 2.45 (s, 3H) ppm.

**<sup>13</sup>C NMR** (151 MHz,  $\text{CDCl}_3$ ):  $\delta$  = 159.6, 143.5, 142.1, 136.7, 130.1, 129.6, 127.2, 113.9, 113.6, 55.3, 47.2, 21.5 ppm. (\*one carbon signal is missing, due to the overlap)

**HRMS** (ESI): mass found: 340.09736, calculated mass for  $\text{C}_{17}\text{H}_{19}\text{NO}_3\text{SNa}^+$ : 340.09779.

**IR** (KBr): 3509, 3276, 2932, 2838, 2321, 2159, 2039, 1991, 1918, 1718, 1673, 1604, 1510, 1456, 1321, 1247, 1156, 1091, 1030, 899, 830, 746, 664  $\text{cm}^{-1}$ .

***N*-(2-(4-Cyanophenyl)allyl)-4-methylbenzenesulfonamide (10h)**

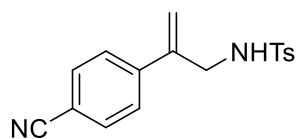

Compound **10h** was prepared according to the general procedure **GP1** and was obtained after column chromatography (*n*-hexane : ethyl acetate 9:1→4:1) as a colorless oil in 71% yield (44 mg).

**<sup>1</sup>H NMR** (600 MHz,  $\text{CDCl}_3$ ):  $\delta$  7.71 (d,  $J$  = 8.0 Hz, 2H), 7.57 (d,  $J$  = 8.2 Hz, 2H), 7.40 – 7.37 (m, 2H), 7.30 (d,  $J$  = 8.0 Hz, 2H), 5.51 (s, 1H), 5.38 (s, 1H), 4.53 (t,  $J$  = 6.4 Hz, 1H), 4.00 (d,  $J$  = 6.5 Hz, 2H), 2.45 (s, 3H) ppm.

**<sup>13</sup>C NMR** (151 MHz,  $\text{CDCl}_3$ ):  $\delta$  = 143.8, 142.3, 141.7, 136.6, 132.3, 129.8, 127.1, 126.8, 118.5, 118.3, 111.7, 46.8, 21.5 ppm.

**HRMS** (ESI): Mass found: 335.08276, calculated mass for  $\text{C}_{17}\text{H}_{16}\text{N}_2\text{NaO}_2\text{S}^+$ : 335.08247.

**IR** (KBr): 3357, 3262, 3051, 2923, 2856, 2593, 2316, 2228, 2088, 1995, 1921, 1733, 1598, 1527, 1426, 1392, 1300, 1154, 1094, 1050, 903, 867, 844, 814, 679  $\text{cm}^{-1}$ .

***N*-(2-(3-Fluorophenyl)allyl)-4-methylbenzenesulfonamide (10i)**

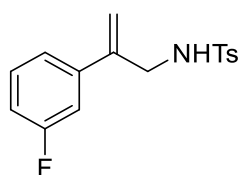

Compound **10i** was prepared according to the general procedure **GP1** and was obtained after column chromatography (*n*-hexane : ethyl acetate 9:1→4:1) as a colorless oil in 57% yield (35 mg).

**<sup>1</sup>H NMR** (600 MHz, CDCl<sub>3</sub>): δ = 7.64 (d, *J* = 8.2 Hz, 2H), 7.22 (d, *J* = 8.1 Hz, 2H), 7.20 – 7.13 (m, 1H), 6.96 (d, *J* = 7.8 Hz, 1H), 6.90 (td, *J* = 8.4, 2.5 Hz, 1H), 6.84 – 6.76 (m, 1H), 5.32 (s, 1H), 5.19 (s, 1H), 4.44 (t, *J* = 6.1 Hz, 1H), 3.91 (d, *J* = 6.2 Hz, 2H), 2.37 (s, 3H) ppm.

**<sup>13</sup>C NMR** (151 MHz, CDCl<sub>3</sub>): δ = 162.8 (d, *J* = 246.3 Hz), 143.69, 141.9, 140.1 (d, *J* = 7.6 Hz), 136.6, 130.0 (d, *J* = 8.2 Hz), 129.7, 127.2, 121.7 (d, *J* = 3.2 Hz), 116.3, 114.9, 113.1 (d, *J* = 22.3 Hz), 46.9, 21.5 ppm.

**<sup>19</sup>F NMR** (565 MHz, CDCl<sub>3</sub>): δ = -112.66 – -112.77 ppm.

**HRMS** (ESI): mass found: 306.09602, calculated mass for C<sub>16</sub>H<sub>17</sub>FNO<sub>2</sub>S<sup>+</sup>: 306.09586.

**IR** (KBr): 3512, 3279, 3071, 2926, 2161, 1923, 1722, 1584, 1489, 1439, 1324, 1268, 1194, 1156, 1089, 870, 813, 788, 726, 666 cm<sup>-1</sup>.

#### 4-Methyl-*N*-(2-(*m*-tolyl)allyl)benzenesulfonamide (**10j**)

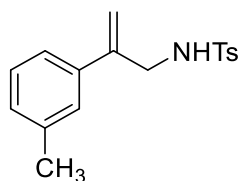

Compound **10j** was prepared according to the general procedure **GP1** and was obtained after column chromatography (*n*-hexane : ethyl acetate 9:1→4:1) as a colorless oil in 50% yield (30 mg).

**<sup>1</sup>H NMR** (600 MHz, CDCl<sub>3</sub>): δ = 7.64 (d, *J* = 8.1 Hz, 2H), 7.22 (d, *J* = 8.0 Hz, 2H), 7.10 (t, *J* = 7.6 Hz, 1H), 7.02 (d, *J* = 7.5 Hz, 1H), 6.97 – 6.89 (m, 2H), 5.27 (s, 1H), 5.11 (s, 1H), 4.35 (t, *J* = 5.9 Hz, 1H), 3.92 (d, *J* = 6.1 Hz, 2H), 2.37 (s, 3H), 2.23 (s, 3H) ppm.

**<sup>13</sup>C NMR** (151 MHz, CDCl<sub>3</sub>): δ = 143.4, 142.9, 138.2, 137.8, 136.8, 129.6, 128.9, 128.4, 127.2, 126.8, 123.1, 115.0, 47.1, 21.5, 21.4 ppm.

**HRMS** (ESI): mass found: 324.10239, calculated mass for C<sub>17</sub>H<sub>19</sub>NNaO<sub>2</sub>S<sup>+</sup>: 324.10287.

**IR** (KBr): 3521, 3281, 3033, 2923, 2163, 1916, 1721, 1683, 1599, 1490, 1446, 1326, 1156, 1089, 904, 863, 811, 790, 704, 666 cm<sup>-1</sup>.

#### *N*-(2-(3-Methoxyphenyl)allyl)-4-methylbenzenesulfonamide (**10k**)

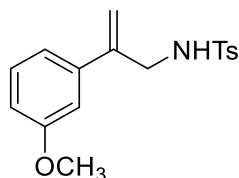

Compound **10k** was prepared according to the general procedure **GP1** and was obtained after column chromatography (*n*-hexane : ethyl acetate 9:1→4:1) as a colorless oil in 49% yield (31 mg).

**<sup>1</sup>H NMR** (600 MHz, CDCl<sub>3</sub>): δ = 7.73 (d, *J* = 8.3 Hz, 2H), 7.32 (d, *J* = 8.0 Hz, 2H), 7.22 (t, *J* = 8.0 Hz, 1H), 6.85 (dd, *J* = 10.8, 5.1 Hz, 2H), 6.81 – 6.77 (m, 1H), 5.39 (s, 1H), 5.23 (s, 1H), 4.47 (t, *J* = 6.0 Hz, 1H), 4.01 (d, *J* = 6.2 Hz, 2H), 3.81 (s, 3H), 2.46 (s, 3H) ppm.

$^{13}\text{C}$  NMR (151 MHz,  $\text{CDCl}_3$ ):  $\delta = 159.7, 143.5, 142.8, 139.3, 136.8, 129.6, 129.5, 127.2, 118.4, 115.3, 113.5, 112.0, 55.2, 47.1, 21.5$  ppm.

**HRMS** (ESI): mass found: 340.09775, calculated mass for  $\text{C}_{17}\text{H}_{19}\text{NNaO}_3\text{S}^+$ : 340.09779.

**IR** (KBr): 3870, 3522, 3279, 2935, 2838, 2165, 1923, 1721, 1681, 1597, 1488, 1455, 1430, 1323, 1288, 1227, 1157, 1090, 1041, 861, 813, 785, 700, 667  $\text{cm}^{-1}$ .

#### 4-Methyl-*N*-(2-(3-(trifluoromethyl)phenyl)allyl)benzenesulfonamide (**10l**)

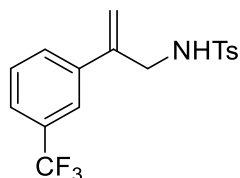

Compound **10l** was prepared according to the general procedure **GP1** and was obtained after column chromatography (*n*-hexane : ethyl acetate 9:1→4:1) as a colorless oil in 57% yield (41 mg).

$^1\text{H}$  NMR (600 MHz,  $\text{CDCl}_3$ ):  $\delta = 7.73$  (d,  $J = 8.2$  Hz, 2H), 7.56 (d,  $J = 7.5$  Hz, 1H), 7.46 (td,  $J = 15.5, 7.8$  Hz, 3H), 7.31 (d,  $J = 8.1$  Hz, 2H), 5.46 (s, 1H), 5.35 (s, 1H), 4.53 (t,  $J = 6.1$  Hz, 1H), 4.05 (d,  $J = 6.3$  Hz, 2H), 2.46 (s, 3H) ppm.

$^{13}\text{C}$  NMR (151 MHz,  $\text{CDCl}_3$ ):  $\delta = 143.7, 141.9, 138.7, 136.6, 130.9$  (q,  $J = 32.6$  Hz), 129.7, 129.3, 129.0, 127.2, 124.8 (q,  $J = 3.4$  Hz), 122.9 (q,  $J = 3.6$  Hz), 122.2 (q,  $J = 273.3$  Hz), 117.0, 46.9, 21.5 ppm.

$^{19}\text{F}$  NMR (565 MHz,  $\text{CDCl}_3$ ):  $\delta = -62.72$  ppm.

**HRMS** (ESI): mass found: 356.09307, calculated mass for  $\text{C}_{17}\text{H}_{17}\text{NO}_2\text{F}_3\text{S}^+$ : 356.09266.

**IR** (KBr): 3515, 3279, 3069, 2927, 2160, 1913, 1720, 1598, 1492, 1439, 1328, 1157, 1120, 1072, 905, 808, 726, 698, 664  $\text{cm}^{-1}$ .

#### *N*-(2-(2-Bromophenyl)allyl)-4-methylbenzenesulfonamide (**10m**)

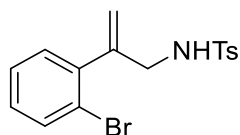

Compound **10m** was prepared according to the general procedure **GP1** and was obtained after column chromatography (*n*-hexane : ethyl acetate 9:1→4:1) as a colorless oil in 51% yield (38 mg).

$^1\text{H}$  NMR (600 MHz,  $\text{CDCl}_3$ ):  $\delta = 7.70$  (d,  $J = 8.2$  Hz, 2H), 7.51 (d,  $J = 7.3$  Hz, 1H), 7.29 – 7.21 (m, 3H), 7.15 (td,  $J = 7.7, 1.7$  Hz, 1H), 7.05 (dd,  $J = 7.5, 1.7$  Hz, 1H), 5.47 (s, 1H), 5.13 (s, 1H), 4.54 (t,  $J = 6.2$  Hz, 1H), 3.95 (d,  $J = 6.4$  Hz, 2H), 2.44 (s, 3H) ppm.

$^{13}\text{C}$  NMR (151 MHz,  $\text{CDCl}_3$ ):  $\delta = 144.7, 143.3, 140.5, 136.8, 132.7, 130.8, 129.6, 129.2, 127.4, 127.1, 122.0, 117.9, 47.6, 21.5$  ppm.

**HRMS** (ESI): mass found: 366.01628, calculated mass for  $\text{C}_{16}\text{H}_{17}\text{NO}_2\text{BrS}^+$ : 366.01579.

**IR** (KBr): 3282, 3060, 2923, 2162, 1920, 1810, 1724, 1643, 1596, 1426, 1325, 1156, 1086, 1024, 914, 853, 813, 759, 733, 663  $\text{cm}^{-1}$ .

#### 4-Methyl-*N*-(2-(*o*-tolyl)allyl)benzenesulfonamide (10n)

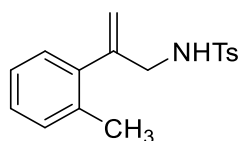

Compound **10n** was prepared according to the general procedure **GP1** and was obtained after column chromatography (*n*-hexane : ethyl acetate 9:1→4:1) as a colorless oil in 42% yield (25 mg).

**<sup>1</sup>H NMR** (400 MHz, CDCl<sub>3</sub>): δ = 7.66 (d, *J* = 8.3 Hz, 2H), 7.36 – 7.21 (m, 2H), 7.19 – 7.03 (m, 3H), 6.91 (d, *J* = 7.5 Hz, 1H), 5.37 (d, *J* = 1.2 Hz, 1H), 4.98 (d, *J* = 1.0 Hz, 1H), 4.48 (t, *J* = 6.1 Hz, 1H), 3.79 (d, *J* = 6.3 Hz, 2H), 2.40 (s, 3H), 2.16 (s, 3H) ppm.

**<sup>13</sup>C NMR** (101 MHz, CDCl<sub>3</sub>): δ = 144.4, 143.3, 139.0, 136.8, 135.1, 130.3, 129.6, 128.5, 127.6, 127.0, 125.6, 116.0, 48.2, 21.4, 19.6 ppm.

**HRMS** (ESI): mass found: 302.12205, calculated mass for C<sub>17</sub>H<sub>20</sub>NO<sub>2</sub>S<sup>+</sup>: 302.12093.

**IR** (KBr): 3283, 3061, 3022, 2923, 2863, 2416, 2163, 2052, 1988, 1917, 1809, 1725, 1642, 1598, 1490, 1448, 1325, 1235, 1157, 1091, 1063, 993, 907, 813, 765, 730, 704, 664 cm<sup>-1</sup>.

#### *N*-(2-(3,5-bis(Trifluoromethyl)phenyl)allyl)-4-methylbenzenesulfonamide (10o)

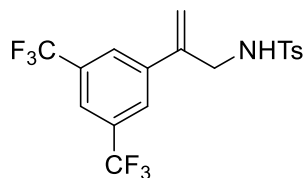

Compound **10o** was prepared according to the general procedure **GP1** and was obtained after column chromatography (*n*-hexane : ethyl acetate 9:1 - 4:1) as colorless oil in 68% (57 mg).

**<sup>1</sup>H NMR** (600 MHz, CDCl<sub>3</sub>): δ = 7.71 (s, 1H), 7.66 – 7.61 (m, 2H), 7.59 (s, 2H), 7.21 (d, *J* = 7.9 Hz, 2H), 5.44 (s, 1H), 5.39 (s, 1H), 4.52 (t, *J* = 6.4 Hz, 1H), 3.98 (d, *J* = 6.5 Hz, 2H), 2.36 (s, 3H) ppm.

**<sup>13</sup>C NMR** (151 MHz, CDCl<sub>3</sub>): δ = 143.9, 141.0, 140.2, 136.6, 131.9 (q, *J* = 33.8 Hz), 129.8, 127.1, 126.3, 123.1 (q, *J* = 273.4 Hz), 121.9 - 121.7 (m), 118.9, 46.7, 21.4 ppm.

**<sup>19</sup>F NMR** (565 MHz, CDCl<sub>3</sub>): δ = -62.92 ppm.

**HRMS** (ESI): Mass found: 462.03528, calculated mass for C<sub>18</sub>H<sub>15</sub>F<sub>6</sub>KNO<sub>2</sub>S<sup>+</sup>: 462.03593.

**IR** (KBr): 3278, 3093, 2930, 2161, 1726, 1599, 1419, 1376, 1327, 1277, 897, 844, 814, 676 cm<sup>-1</sup>.

#### 4-Chloro-*N*-(2-phenylallyl)benzenesulfonamide (10p)

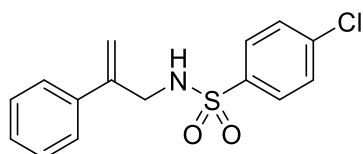

Compound **10p** was prepared according to the general procedure **GP1** and was obtained after column chromatography (*n*-hexane : ethyl acetate 9:1 - 4:1) as a colorless oil in 61% (37 mg).

**<sup>1</sup>H NMR** (600 MHz, CDCl<sub>3</sub>): δ = 7.75 (d, *J* = 8.4 Hz, 2H), 7.47 (d, *J* = 8.3 Hz, 2H), 7.33 – 7.29 (m, 3H), 7.24 – 7.19 (m, 2H), 5.38 (s, 1H), 5.21 (s, 1H), 4.54 (t, *J* = 6.2 Hz, 1H), 4.07 (d, *J* = 6.2 Hz, 2H) ppm.

**<sup>13</sup>C NMR** (151 MHz, CDCl<sub>3</sub>): δ = 142.7, 139.2, 138.4, 137.6, 129.3, 128.6, 128.3, 126.0, 115.5, 47.1 ppm. (\*one carbon signal is missing, due to the overlap)

**HRMS** (ESI): Mass found: 330.03235, calculated mass for C<sub>15</sub>H<sub>14</sub>CINNaO<sub>2</sub>S<sup>+</sup>: 330.03260.

**IR** (KBr): 3852, 3524, 3284, 3089, 2929, 2668, 2325, 2163, 2100, 1808, 1725, 1632, 1580, 1475, 1397, 1327, 1279, 1159, 1087, 1014, 907, 826, 754, 703 cm<sup>-1</sup>.

#### 2-Nitro-*N*-(2-phenylallyl)benzenesulfonamide (**10q**)

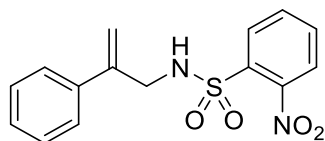

Compound **10q** was prepared according to the general procedure **GP1** and was obtained after column chromatography (*n*-hexane : ethyl acetate 9:1→4:1) as a yellow solid in 69% yield (44 mg).

**<sup>1</sup>H NMR** (600 MHz, CDCl<sub>3</sub>): δ = 8.20 – 8.02 (m, 1H), 7.92 – 7.80 (m, 1H), 7.79 – 7.67 (m, 2H), 7.36 – 7.21 (m, 3H), 7.22 – 7.07 (m, 2H), 5.60 (t, *J* = 5.8 Hz, 1H), 5.35 (s, 1H), 5.29 (s, 1H), 4.26 (d, *J* = 6.3 Hz, 2H) ppm.

**<sup>13</sup>C NMR** (151 MHz, CDCl<sub>3</sub>): δ = 147.7, 142.8, 137.6, 134.2, 133.4, 132.7, 131.1, 128.6, 128.3, 125.9, 125.4, 115.5, 47.8 ppm.

**HRMS** (ESI): mass found: 319.07507, calculated mass for C<sub>15</sub>H<sub>15</sub>N<sub>2</sub>O<sub>4</sub>S<sup>+</sup>: 319.07471.

**IR** (KBr): 3869, 3363, 3099, 3051, 2974, 2936, 2866, 2679, 2321, 2158, 2006, 1889, 1801, 1725, 1627, 1572, 1527, 1442, 1405, 1334, 1234, 1153, 1112, 1076, 979, 938, 900, 860, 821, 776, 731, 706, 663 cm<sup>-1</sup>.

#### 4-Methyl-*N*-(2,3,4,5-tetrahydro-[1,1'-biphenyl]-2-yl)benzenesulfonamide (**10r**)

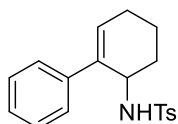

Compound **10r** was prepared according to the general procedure **GP1** and was obtained after column chromatography (*n*-hexane : ethyl acetate 20:1→9:1) as a colorless oil in 70% yield (46 mg). The NMR spectrum is consistent with the previous literature.<sup>3</sup>

**<sup>1</sup>H NMR** (400 MHz, CDCl<sub>3</sub>): δ = 7.50 (d, *J* = 7.9 Hz, 2H), 7.13 (t, *J* = 7.7 Hz, 3H), 7.03 (t, *J* = 7.6 Hz, 2H), 6.90 (d, *J* = 7.8 Hz, 2H), 6.06 (s, 1H), 4.30 (d, *J* = 5.4 Hz, 1H), 4.21 (d, *J* = 2.7 Hz, 1H), 2.41 (s, 3H), 2.28 – 2.01 (m, 3H), 1.93 – 1.57 (m, 3H) ppm.

**<sup>13</sup>C NMR** (101 MHz, CDCl<sub>3</sub>): δ = 142.9, 139.2, 137.1, 136.3, 131.2, 129.4, 128.2, 127.1, 127.0, 126.1, 49.4, 29.9, 25.6, 21.5, 16.5 ppm.

**HRMS** (ESI): mass found: 350.11816, calculated mass for C<sub>19</sub>H<sub>21</sub>NO<sub>2</sub>SN<sup>+</sup>: 350.11852.

**IR** (KBr): 3851, 3454, 3258, 3058, 3028, 2936, 2868, 2713, 2507, 2320, 2161, 2102, 2034, 2002, 1969, 1918, 1809, 1718, 1661, 1598, 1493, 1446, 1420, 1323, 1258, 1151, 1067, 998, 945, 914, 876, 811, 757, 696, 667 cm<sup>-1</sup>.



#### 4-Methyl-*N*-(2-methylcyclopent-2-en-1-yl)benzenesulfonamide (10s)

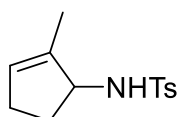

Compound **10s** was prepared according to the general procedure **GP1** and was obtained after column chromatography (*n*-hexane : ethyl acetate 20:1→9:1) as a colorless oil in 51% yield (30 mg).

**<sup>1</sup>H NMR** (400 MHz, CDCl<sub>3</sub>): δ = 7.75 (d, *J* = 8.1 Hz, 2H), 7.28 (d, *J* = 8.2 Hz, 2H), 5.45 (s, 1H), 4.30 (d, *J* = 9.7 Hz, 1H), 4.19 – 4.10 (m, 1H), 2.41 (s, 3H), 2.33 – 2.17 (m, 1H), 2.16 – 1.93 (m, 2H), 1.58 (s, 3H), 1.50 – 1.35 (m, 1H) ppm.

**<sup>13</sup>C NMR** (101 MHz, CDCl<sub>3</sub>): δ = 143.1, 138.7, 138.2, 129.6, 128.6, 127.0, 62.4, 32.4, 29.8, 21.5, 13.5 ppm.

**HRMS** (ESI): mass found: 252.10457, calculated mass for C<sub>13</sub>H<sub>18</sub>NO<sub>2</sub>S<sup>+</sup>: 252.10528.

**IR** (KBr): 3275, 3043, 2929, 2858, 2734, 2325, 2161, 2092, 1918, 1719, 1597, 1494, 1438, 1321, 1154, 1089, 1036, 990, 904, 813, 705, 664 cm<sup>-1</sup>.

#### 4-Methyl-*N*-(2-methylene-4-phenylbut-3-yn-1-yl)benzenesulfonamide (10t)

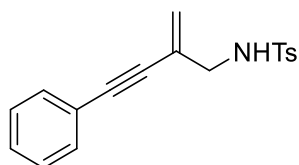

Compound **10t** was prepared according to the general procedure **GP1** and was obtained after column chromatography (*n*-hexane : ethyl acetate 20:1→9:1) as a light yellow oil in 26% yield (16 mg).

**<sup>1</sup>H NMR** (600 MHz, CDCl<sub>3</sub>): δ = 7.86 – 7.76 (m, 2H), 7.41 – 7.38 (m, 2H), 7.37 – 7.33 (m, 3H), 7.30 (d, *J* = 8.0 Hz, 2H), 5.48 (dd, *J* = 13.1, 1.1 Hz, 2H), 4.73 (t, *J* = 6.3 Hz, 1H), 3.78 (d, *J* = 6.4 Hz, 2H), 2.43 (s, 3H) ppm.

**<sup>13</sup>C NMR** (151 MHz, CDCl<sub>3</sub>): δ = 143.5, 137.1, 131.6, 129.6, 128.7, 128.3, 127.2, 126.8, 122.9, 122.3, 91.2, 86.6, 47.8, 21.5 ppm.

**HRMS** (ESI): mass found: 312.10486, calculated mass for C<sub>18</sub>H<sub>18</sub>NO<sub>2</sub>S<sup>+</sup>: 312.10528.

**IR** (KBr): 3520, 3286, 3059, 2926, 2864, 2201, 2162, 2030, 1986, 1906, 1729, 1676, 1597, 1492, 1446, 1333, 1157, 1086, 1025, 906, 814, 757, 689, 668 cm<sup>-1</sup>.

#### *N*-(2-Cyclohexylallyl)-4-methylbenzenesulfonamide (10u)

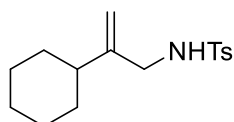

Compound **10u** was prepared according to the general procedure **GP1** and was obtained after column chromatography (*n*-hexane : ethyl acetate 20:1→9:1) as a colorless oil in 48% yield (28 mg).

**<sup>1</sup>H NMR** (600 MHz, CDCl<sub>3</sub>): δ = 7.84 – 7.73 (m, 2H), 7.34 (d, *J* = 8.0 Hz, 2H), 5.05 – 4.64 (m, 2H), 4.35 (t, *J* = 6.2 Hz, 1H), 3.55 (d, *J* = 6.4 Hz, 2H), 2.46 (s, 3H), 1.84 (tt, *J* = 11.8, 2.9 Hz, 1H), 1.78 – 1.72 (m, 2H), 1.71 – 1.65 (m, 3H), 1.34 – 0.99 (m, 5H) ppm.

**<sup>13</sup>C NMR** (151 MHz, CDCl<sub>3</sub>): δ = 149.8, 143.4, 136.9, 129.7, 127.1, 110.3, 47.0, 41.6, 32.1, 26.5, 26.1, 21.5 ppm.

**HRMS** (ESI): mass found: 316.13368, calculated mass for C<sub>16</sub>H<sub>23</sub>NO<sub>2</sub>SNa<sup>+</sup>: 316.13417.

**IR** (KBr): 3527, 3282, 2925, 2853, 2666, 2165, 2039, 1912, 1731, 1647, 1598, 1495, 1446, 1325, 1156, 1091, 892, 842, 813, 735, 703, 665 cm<sup>-1</sup>.

### ***N*-(3,3-Dimethyl-2-methylenebutyl)-4-methylbenzenesulfonamide and 4-Methyl-*N*-(2,2,3-trimethylbut-3-en-1-yl)benzenesulfonamide (10v)**

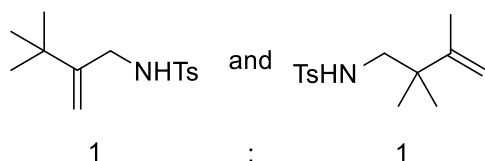

Compound **10v** was prepared according to the general procedure **GP1** and was obtained after column chromatography (*n*-hexane : ethyl acetate 20:1→9:1) as a colorless oil in 64% yield (34 mg).

**<sup>1</sup>H NMR** (600 MHz, CDCl<sub>3</sub>): δ = 7.76 (d, *J* = 8.2 Hz, 1.38H), 7.73 (d, *J* = 8.2 Hz, 1.77H), 7.32 (dd, *J* = 7.8, 5.2 Hz, 3.36H), 4.97 (s, 0.83H) and 4.87 (s, 1.00H), 4.90 (s, 0.81H) and 4.74 (s, 1.03H), 4.34 (t, *J* = 6.0 Hz, 0.70H) and 4.17 (t, *J* = 5.6 Hz, 0.90H), 3.59 (d, *J* = 6.2 Hz, 1.61H) and 2.80 (d, *J* = 6.0 Hz, 2.00H), 2.44 (s, 2.10H) and 2.43 (s, 3.08H), 1.59 (s, 2.18H), 1.56 (s, 2.94H), 1.03 (s, 13.27H) ppm.

**<sup>13</sup>C NMR** (151 MHz, CDCl<sub>3</sub>): δ = 152.7, 148.5, 143.4, 143.3, 136.8, 136.7, 129.69, 129.64, 127.1, 127.0, 112.6, 109.4, 50.9, 44.2, 39.2, 35.3, 29.1, 24.9, 21.5, 18.9 ppm.

**HRMS** (ESI): mass found: 290.11847, calculated mass for C<sub>14</sub>H<sub>21</sub>NO<sub>2</sub>SNa<sup>+</sup>: 290.11852.

**IR** (KBr): 3286, 2965, 2875, 2158, 2030, 1922, 1725, 1638, 1599, 1449, 1326, 1156, 1087, 896, 814, 706, 663 cm<sup>-1</sup>.

### **2-Methyl-2-phenyl-1-tosylaziridine (11a)**

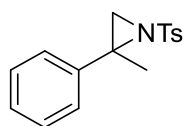

Compound **11a** was prepared according to the general procedure **GP2** and was obtained after column chromatography (*n*-hexane : ethyl acetate 20:1→9:1) as a colorless oil in 80% yield (46 mg).

**<sup>1</sup>H NMR** (400 MHz, CDCl<sub>3</sub>): δ = 7.86 (d, *J* = 8.3 Hz, 2H), 7.40 – 7.35 (m, 2H), 7.33 – 7.28 (m, 4H), 7.28 – 7.22 (m, 1H), 2.95 (s, 1H), 2.51 (s, 1H), 2.42 (s, 3H), 2.04 (s, 3H) ppm.

**<sup>13</sup>C NMR** (101 MHz, CDCl<sub>3</sub>): δ = 143.9, 140.9, 137.7, 129.5, 128.3, 127.7, 127.4, 126.5, 51.8, 41.8, 21.5, 20.9 ppm.

**HRMS** (ESI): mass found: 288.10533, calculated mass for C<sub>16</sub>H<sub>18</sub>NO<sub>2</sub>S<sup>+</sup>: 288.10528.

**IR** (KBr): 3518, 3061, 2978, 2932, 2173, 2028, 1894, 1813, 1728, 1683, 1597, 1553, 1494, 1444, 1380, 1313, 1156, 1131, 1093, 1057, 1013, 935, 869, 808, 767, 704, 659 cm<sup>-1</sup>.

### 2-(Methyl-d3)-2-phenyl-1-tosylaziridine (11a-d<sub>3</sub>)

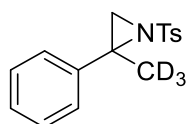

Compound **11a-d<sub>3</sub>** was prepared according to the general procedure **GP2** and was obtained after column chromatography (*n*-hexane : ethyl acetate 20:1→9:1) as a colorless oil in 80% yield (46 mg), deuterium content: 86%.

**<sup>1</sup>H NMR** (400 MHz, CDCl<sub>3</sub>): δ = 7.86 (d, *J* = 8.3 Hz, 2H), 7.39 – 7.34 (m, 2H), 7.30 (ddd, *J* = 7.4, 4.6, 2.6 Hz, 4H), 7.27 – 7.21 (m, 1H), 2.94 (s, 1H), 2.50 (s, 1H), 2.42 (s, 3H), 2.05 – 1.90 (m, 0.42H) ppm.

**<sup>13</sup>C NMR** (101 MHz, CDCl<sub>3</sub>): δ = 143.9, 140.9, 137.7, 129.4, 128.3, 127.7, 127.4, 126.4, 51.5, 41.7, 21.5, 20.5 ppm.

**HRMS** (ESI): mass found: 291.12431, calculated mass for C<sub>16</sub>H<sub>15</sub>D<sub>3</sub>NO<sub>2</sub>S<sup>+</sup>: 291.12411.

**IR** (KBr): 3505, 3294, 3060, 2926, 2161, 2025, 1975, 1918, 1812, 1733, 1597, 1494, 1446, 1403, 1316, 1155, 1088, 1047, 974, 871, 809, 774, 699, 659 cm<sup>-1</sup>.

### 2-(4-Chlorophenyl)-2-methyl-1-tosylaziridine (11b)

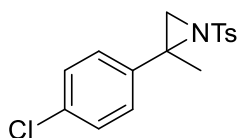

Compound **11b** was prepared according to the general procedure **GP2** and was obtained after column chromatography (*n*-hexane : ethyl acetate 20:1→9:1) as a white solid in 85% yield (55 mg).

**<sup>1</sup>H NMR** (400 MHz, CDCl<sub>3</sub>): δ = 7.84 (d, *J* = 8.3 Hz, 2H), 7.43 – 7.20 (m, 6H), 2.93 (s, 1H), 2.47 (s, 1H), 2.42 (s, 3H), 2.01 (s, 3H) ppm.

**<sup>13</sup>C NMR** (101 MHz, CDCl<sub>3</sub>): δ = 144.1, 139.4, 137.5, 133.6, 129.5, 128.5, 127.9, 127.4, 50.9, 41.8, 21.5, 20.7 ppm.

**HRMS** (ESI): mass found: 344.04785, calculated mass for C<sub>16</sub>H<sub>16</sub>ClNO<sub>2</sub>SNa<sup>+</sup>: 344.04825.

**IR** (KBr): 3511, 3063, 2928, 2312, 2166, 2035, 1909, 1734, 1597, 1492, 1400, 1321, 1158, 1128, 1092, 1017, 938, 873, 819, 694, 658 cm<sup>-1</sup>.

### 2-(4-Bromophenyl)-2-methyl-1-tosylaziridine (11c)

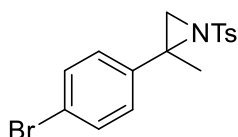

Compound **11c** was prepared according to the general procedure **GP2** and was obtained after column chromatography (*n*-hexane : ethyl acetate 20:1→9:1) as a colorless oil in 85% yield (63 mg).

**<sup>1</sup>H NMR** (400 MHz, CDCl<sub>3</sub>): δ = 7.84 (d, *J* = 8.3 Hz, 2H), 7.46 – 7.38 (m, 2H), 7.31 (d, *J* = 8.0 Hz, 2H), 7.26 – 7.20 (m, 2H), 2.93 (s, 1H), 2.46 (s, 1H), 2.42 (s, 3H), 2.00 (s, 3H) ppm.

**<sup>13</sup>C NMR** (101 MHz, CDCl<sub>3</sub>): δ = 144.1, 140.0, 137.4, 131.5, 129.5, 128.2, 127.4, 121.7, 51.0, 41.8, 21.6, 20.6 ppm.

**HRMS** (ESI): mass found: 387.99807, calculated mass for  $C_{16}H_{16}BrNO_2SNa^+$ : 387.99773.

**IR** (KBr): 3512, 3065, 2926, 2161, 2030, 1909, 1733, 1596, 1490, 1454, 1397, 1321, 1157, 1127, 1090, 1011, 937, 873, 816, 707, 688, 656  $cm^{-1}$ .

#### 4-(2-Methyl-1-tosylaziridin-2-yl)benzonitrile (**11d**)

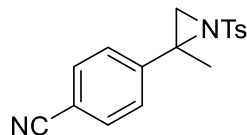

Compound **11d** was prepared according to the general procedure **GP2** and was obtained after column chromatography (*n*-hexane : ethyl acetate 20:1→9:1) as a colorless oil in 77% yield (48 mg).

**<sup>1</sup>H NMR** (400 MHz,  $CDCl_3$ ):  $\delta$  = 7.85 (d,  $J$  = 8.3 Hz, 2H), 7.65 – 7.57 (m, 2H), 7.53 – 7.44 (m, 2H), 7.33 (d,  $J$  = 8.0 Hz, 2H), 2.98 (s, 1H), 2.45 (s, 1H), 2.43 (s, 3H), 2.04 (s, 3H) ppm.

**<sup>13</sup>C NMR** (101 MHz,  $CDCl_3$ ):  $\delta$  = 146.0, 144.3, 137.2, 132.3, 129.6, 127.4, 127.3, 118.4, 111.6, 50.6, 41.9, 21.6, 20.1 ppm.

**HRMS** (ESI): mass found: 335.08225, calculated mass for  $C_{17}H_{16}N_2O_2SNa^+$ : 335.08247.

**IR** (KBr): 3065, 2984, 2930, 2229, 2175, 2083, 1924, 1808, 1734, 1691, 1601, 1501, 1452, 1403, 1321, 1262, 1158, 1129, 1093, 1063, 1022, 939, 874, 819, 766, 706, 658  $cm^{-1}$ .

#### 2-(3-Fluorophenyl)-2-methyl-1-tosylaziridine (**11e**)

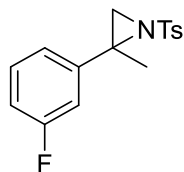

Compound **11e** was prepared according to the general procedure **GP2** and was obtained after column chromatography (*n*-hexane : ethyl acetate 20:1→9:1) as a colorless oil in 84% yield (52 mg).

**<sup>1</sup>H NMR** (400 MHz,  $CDCl_3$ ):  $\delta$  = 7.86 (d,  $J$  = 8.3 Hz, 2H), 7.32 (d,  $J$  = 8.0 Hz, 2H), 7.30 – 7.23 (m, 1H), 7.15 (dd,  $J$  = 7.8, 1.0 Hz, 1H), 7.09 – 7.02 (m, 1H), 7.00 – 6.84 (m, 1H), 2.95 (s, 1H), 2.46 (s, 1H), 2.42 (s, 3H), 2.03 (s, 3H) ppm.

**<sup>13</sup>C NMR** (101 MHz,  $CDCl_3$ ):  $\delta$  = 162.6 (d,  $J$  = 246.3 Hz), 144.1, 143.5 (d,  $J$  = 7.4 Hz), 137.5, 129.9 (d,  $J$  = 8.3 Hz), 129.5, 127.4, 122.0 (d,  $J$  = 2.8 Hz), 114.7 (d,  $J$  = 21.1 Hz), 113.6 (d,  $J$  = 22.7 Hz), 50.8, 42.0, 21.5, 20.3 ppm.

**<sup>19</sup>F NMR** (376 MHz,  $CDCl_3$ ):  $\delta$  = -104.78 – -129.58 ppm.

**HRMS** (ESI): mass found: 328.07782, calculated mass for  $C_{16}H_{16}FNO_2SNa^+$ : 328.07780.

**IR** (KBr): 3069, 2985, 2929, 2166, 2034, 1735, 1590, 1489, 1443, 1387, 1321, 1202, 1157, 1125, 1091, 1026, 938, 851, 787, 709  $cm^{-1}$ .

### 2-Methyl-2-(*m*-tolyl)-1-tosylaziridine (**11f**)

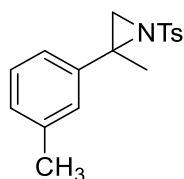

Compound **11f** was prepared according to the general procedure **GP2** and was obtained after column chromatography (*n*-hexane : ethyl acetate 20:1→9:1) as a colorless oil in 75% yield (45 mg).

**<sup>1</sup>H NMR** (600 MHz, CDCl<sub>3</sub>): δ = 7.86 (d, *J* = 8.2 Hz, 2H), 7.31 (d, *J* = 8.2 Hz, 2H), 7.23 – 7.15 (m, 3H), 7.07 (d, *J* = 7.2 Hz, 1H), 2.94 (s, 1H), 2.52 (s, 1H), 2.43 (s, 3H), 2.33 (s, 3H), 2.03 (s, 3H) ppm.

**<sup>13</sup>C NMR** (151 MHz, CDCl<sub>3</sub>): δ = 143.8, 140.9, 138.0, 137.7, 129.4, 128.4, 128.2, 127.4, 127.2, 123.5, 51.9, 41.7, 21.5, 21.4, 21.0 ppm.

**HRMS** (ESI): mass found: 324.10249, calculated mass for C<sub>17</sub>H<sub>19</sub>NO<sub>2</sub>SNa<sup>+</sup>: 324.10287.

**IR** (KBr): 3516, 3276, 2924, 2857, 2661, 2326, 2174, 2089, 2055, 2028, 1991, 1913, 1802, 1732, 1682, 1599, 1490, 1452, 1379, 1322, 1158, 1089, 940, 905, 844, 786, 705 cm<sup>-1</sup>.

### 2-(3-Methoxyphenyl)-2-methyl-1-tosylaziridine (**11g**)

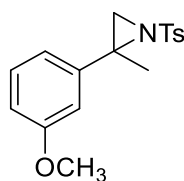

Compound **11g** was prepared according to the general procedure **GP2** and was obtained after column chromatography (*n*-hexane : ethyl acetate 20:1→9:1) as a colorless oil in 72% yield (46 mg).

**<sup>1</sup>H NMR** (400 MHz, CDCl<sub>3</sub>): δ = 7.85 (d, *J* = 8.3 Hz, 2H), 7.30 (d, *J* = 8.4 Hz, 2H), 7.22 (dd, *J* = 13.4, 5.4 Hz, 1H), 6.98 – 6.92 (m, 1H), 6.91 – 6.86 (m, 1H), 6.79 (dd, *J* = 8.2, 2.5 Hz, 1H), 3.77 (s, 3H), 2.93 (s, 1H), 2.49 (s, 1H), 2.41 (s, 3H), 2.02 (s, 3H) ppm.

**<sup>13</sup>C NMR** (101 MHz, CDCl<sub>3</sub>): δ = 159.5, 143.9, 142.6, 137.6, 129.5, 129.4, 127.4, 118.7, 113.0, 112.4, 55.2, 51.6, 41.7, 21.5, 20.7 ppm.

**HRMS** (ESI): mass found: 340.09772, calculated mass for C<sub>17</sub>H<sub>19</sub>NO<sub>3</sub>SNa<sup>+</sup>: 340.09779.

**IR** (KBr): 3527, 2934, 2838, 2326, 2175, 2080, 1990, 1932, 1731, 1682, 1594, 1488, 1456, 1320, 1227, 1158, 1127, 1092, 1040, 939, 901, 845, 783, 702 cm<sup>-1</sup>.

### 2-Methyl-1-tosyl-2-(3-(trifluoromethyl)phenyl)aziridine (**11h**)

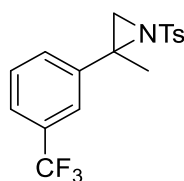

Compound **11h** was prepared according to the general procedure **GP2** and was obtained after column chromatography (*n*-hexane : ethyl acetate 20:1→9:1) as a colorless oil in 83% yield (59 mg).

**<sup>1</sup>H NMR** (400 MHz, CDCl<sub>3</sub>): δ = 7.86 (d, *J* = 8.3 Hz, 2H), 7.60 – 7.55 (m, 2H), 7.54 – 7.46 (m, 1H), 7.43 (t, *J* = 7.7 Hz, 1H), 7.32 (d, *J* = 8.0 Hz, 2H), 2.98 (s, 1H), 2.49 (s, 1H), 2.42 (s, 3H), 2.05 (s, 3H) ppm.

**<sup>13</sup>C NMR** (101 MHz, CDCl<sub>3</sub>): δ = 144.2, 142.0, 137.3, 130.9, 130.0, 129.6, 128.9, 127.5, 124.6 (q, *J* = 3.7 Hz), 123.8 (q, *J* = 272.6 Hz), 123.2 (q, *J* = 3.7 Hz), 50.8, 41.7, 21.5, 20.4 ppm.

**<sup>19</sup>F NMR** (376 MHz, CDCl<sub>3</sub>): δ = -62.66 ppm.

**HRMS** (ESI): mass found: 378.07446, calculated mass for C<sub>17</sub>H<sub>16</sub>F<sub>3</sub>NO<sub>2</sub>SNa<sup>+</sup>: 378.07461.

**IR** (KBr): 3069, 2030, 2165, 2028, 1730, 1598, 1493, 1450, 1387, 1318, 1262, 1160, 1121, 1071, 1027, 939, 885, 808, 709, 663 cm<sup>-1</sup>.

### 2-(2-Bromophenyl)-2-methyl-1-tosylaziridine (**11i**)

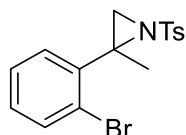

Compound **11i** was prepared according to the general procedure **GP2** and was obtained after column chromatography (*n*-hexane : ethyl acetate 20:1→9:1) as a colorless oil in 66% yield (49 mg).

**<sup>1</sup>H NMR** (400 MHz, CDCl<sub>3</sub>): δ = 7.88 (d, *J* = 8.3 Hz, 2H), 7.59 (dd, *J* = 7.7, 1.7 Hz, 1H), 7.46 (dd, *J* = 8.0, 1.0 Hz, 1H), 7.34 – 7.27 (m, 3H), 7.12 (td, *J* = 7.9, 1.7 Hz, 1H), 3.05 (s, 1H), 2.50 (s, 1H), 2.41 (s, 3H), 2.03 (s, 3H) ppm.

**<sup>13</sup>C NMR** (101 MHz, CDCl<sub>3</sub>): δ = 144.1, 140.8, 137.5, 132.5, 130.9, 129.5, 129.2, 127.6, 127.5, 120.8, 53.3, 42.5, 21.5, 20.0 ppm.

**HRMS** (ESI): mass found: 387.99804, calculated mass for C<sub>16</sub>H<sub>16</sub>BrNO<sub>2</sub>SNa<sup>+</sup>: 387.99773.

**IR** (KBr): 3063, 2928, 2167, 2028, 1973, 1921, 1910, 1700, 1595, 1566, 1435, 1381, 1322, 1274, 1244, 1158, 1091, 1021, 938, 876, 818, 758, 721, 691 cm<sup>-1</sup>.

### 2-Methyl-2-(*o*-tolyl)-1-tosylaziridine (**11j**)

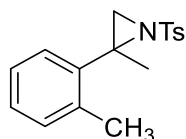

Compound **11j** was prepared according to the general procedure **GP2** and was obtained after column chromatography (*n*-hexane : ethyl acetate 20:1→9:1) as a colorless oil in 65% yield (39 mg).

**<sup>1</sup>H NMR** (400 MHz, CDCl<sub>3</sub>): δ = 7.88 (d, *J* = 8.3 Hz, 2H), 7.42 – 7.35 (m, 1H), 7.33 – 7.26 (m, 2H), 7.19 – 7.13 (m, 2H), 7.13 – 7.07 (m, 1H), 3.02 (s, 1H), 2.44 (s, 1H), 2.43 (s, 3H), 2.41 (s, 3H), 2.00 (s, 3H) ppm.

**<sup>13</sup>C NMR** (101 MHz, CDCl<sub>3</sub>): δ = 143.9, 139.7, 137.8, 134.8, 130.4, 129.5, 128.3, 127.7, 127.4, 126.0, 52.7, 41.8, 21.5, 20.7, 18.7 ppm.

**HRMS** (ESI): mass found: 324.10251, calculated mass for C<sub>17</sub>H<sub>19</sub>NO<sub>2</sub>SNa<sup>+</sup>: 324.10287.

**IR** (KBr): 3509, 2928, 2163, 1976, 1917, 1809, 1733, 1598, 1492, 1452, 1383, 1320, 1263, 1157, 1090, 1027, 939, 876, 821, 764, 708  $\text{cm}^{-1}$ .

### 2-(2,4-Dimethylphenyl)-2-methyl-1-tosylaziridine (**11k**)

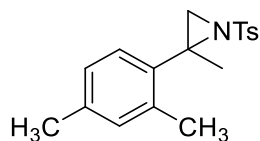

Compound **11k** was prepared according to the general procedure **GP2** and was obtained after column chromatography (*n*-hexane : ethyl acetate 20:1→9:1) as a colorless oil in 60% yield (38 mg).

**<sup>1</sup>H NMR** (400 MHz,  $\text{CDCl}_3$ ):  $\delta$  = 7.87 (d,  $J$  = 8.3 Hz, 2H), 7.27 (dd,  $J$  = 15.9, 7.8 Hz, 3H), 7.02 – 6.85 (m, 2H), 3.00 (s, 1H), 2.42 (s, 1H), 2.41 (s, 3H), 2.39 (s, 3H), 2.27 (s, 3H), 1.98 (s, 3H) ppm.

**<sup>13</sup>C NMR** (101 MHz,  $\text{CDCl}_3$ ):  $\delta$  = 143.8, 137.8, 137.4, 136.9, 134.6, 131.1, 129.4, 128.3, 127.4, 126.6, 52.6, 41.9, 21.5, 20.9, 20.7, 18.6 ppm.

**HRMS** (ESI): mass found: 338.11853, calculated mass for  $\text{C}_{18}\text{H}_{21}\text{NO}_2\text{SNa}^+$ : 338.11852.

**IR** (KBr): 3518, 3286, 2925, 2735, 2164, 2028, 1912, 1736, 1679, 1600, 1500, 1450, 1381, 1321, 1266, 1157, 1089, 1060, 1028, 940, 868, 813, 710, 660  $\text{cm}^{-1}$ .

### 2-Methyl-2-phenyl-1-(phenylsulfonyl)aziridine (**11l**)

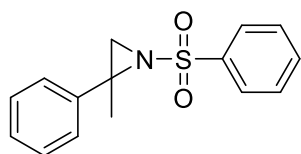

Compound **11l** was prepared according to the general procedure **GP2** and was obtained after column chromatography (*n*-hexane : ethyl acetate 20:1→9:1) as a colorless oil in 77% yield (42 mg).

**<sup>1</sup>H NMR** (400 MHz,  $\text{CDCl}_3$ ):  $\delta$  = 7.99 – 7.96 (m, 2H), 7.64 – 7.55 (m, 1H), 7.55 – 7.48 (m, 2H), 7.38 – 7.35 (m, 2H), 7.34 – 7.22 (m, 3H), 2.97 (s, 1H), 2.54 (s, 1H), 2.05 (s, 3H) ppm.

**<sup>13</sup>C NMR** (101 MHz,  $\text{CDCl}_3$ ):  $\delta$  = 140.8, 140.5, 133.0, 128.9, 128.4, 127.7, 127.4, 126.4, 52.0, 41.9, 21.0 ppm.

**HRMS** (ESI): mass found: 274.08967, calculated mass for  $\text{C}_{15}\text{H}_{16}\text{NO}_2\text{S}^+$ : 274.08963.

**IR** (KBr): 3281, 3063, 2991, 2933, 2325, 2161, 2031, 1993, 1899, 1816, 1728, 1684, 1603, 1494, 1447, 1384, 1316, 1266, 1159, 1131, 1091, 1061, 1023, 938, 871, 806, 762, 738, 690  $\text{cm}^{-1}$ .

### 1-((4-Chlorophenyl)sulfonyl)-2-methyl-2-phenylaziridine (**11m**)

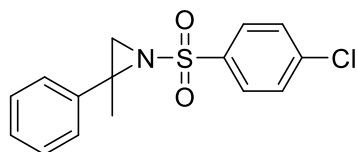

Compound **11m** was prepared according to the general procedure **GP2** and was obtained after column chromatography (*n*-hexane : ethyl acetate 20:1→9:1) as a colorless oil in 59% yield (37 mg).

**<sup>1</sup>H NMR** (400 MHz, CDCl<sub>3</sub>): δ = 7.97 – 7.85 (m, 2H), 7.52 – 7.44 (m, 2H), 7.39 – 7.26 (m, 5H), 2.96 (s, 1H), 2.54 (s, 1H), 2.04 (s, 3H) ppm.

**<sup>13</sup>C NMR** (101 MHz, CDCl<sub>3</sub>): δ = 140.5, 139.6, 139.0, 129.2, 128.9, 128.4, 127.8, 126.4, 52.3, 42.1, 21.1 ppm.

**HRMS** (ESI): mass found: 308.05030, calculated mass for C<sub>15</sub>H<sub>15</sub>ClNO<sub>2</sub>S<sup>+</sup>: 308.05065.

**IR** (KBr): 3520, 3284, 3029, 2979, 2929, 2320, 2164, 2029, 1911, 1727, 1681, 1582, 1475, 1448, 1392, 1324, 1273, 1160, 1087, 1021, 939, 872, 824, 760, 700 cm<sup>-1</sup>.

### 2-Methyl-1-(naphthalen-2-ylsulfonyl)-2-phenylaziridine (**11n**)

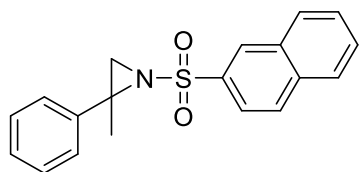

Compound **11n** was prepared according to the general procedure **GP2** and was obtained after column chromatography (*n*-hexane : ethyl acetate 20:1→9:1) as a colorless oil in 70% yield (45 mg).

**<sup>1</sup>H NMR** (600 MHz, CDCl<sub>3</sub>): δ = 8.51 (s, 1H), 8.01 – 7.97 (m, 3H), 7.92 (d, *J* = 8.1 Hz, 1H), 7.67 – 7.59 (m, 2H), 7.42 – 7.38 (m, 2H), 7.34 – 7.30 (m, 2H), 7.29 – 7.24 (m, 1H), 3.03 (s, 1H), 2.57 (s, 1H), 2.10 (s, 3H) ppm.

**<sup>13</sup>C NMR** (151 MHz, CDCl<sub>3</sub>): δ = 129.4, 129.2, 128.9, 128.7, 128.57, 128.51, 128.4, 127.89, 127.80, 127.49, 127.45, 126.9, 126.5, 122.9, 52.1, 42.1, 21.1 ppm.

**HRMS** (ESI): mass found: 346.08670., calculated mass for C<sub>19</sub>H<sub>17</sub>NO<sub>2</sub>SNa<sup>+</sup>: 346.08722.

**IR** (KBr): 3516, 3276, 3060, 2922, 2852, 2321, 2161, 2098, 2032, 1729, 1624, 1593, 1498, 1448, 1383, 1318, 1154, 1065, 947, 868, 812, 754, 698, 658 cm<sup>-1</sup>.

### 2-Methyl-1-(methylsulfonyl)-2-phenylaziridine (**11o**)

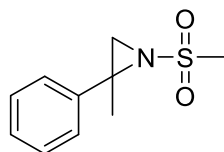

Compound **11o** was prepared according to the general procedure **GP2** and was obtained after column chromatography (*n*-hexane : ethyl acetate 9:1→4:1) as a colorless oil in 40% yield (18 mg).

**<sup>1</sup>H NMR** (400 MHz, CDCl<sub>3</sub>): δ = 7.42 – 7.38 (m, 2H), 7.37 – 7.31 (m, 2H), 7.30 – 7.26 (m, 1H), 3.12 (s, 3H), 2.93 (s, 1H), 2.60 (s, 1H), 1.97 (s, 3H) ppm.

**<sup>13</sup>C NMR** (101 MHz, CDCl<sub>3</sub>): δ = 128.4, 127.8, 126.6, 126.4, 42.3, 41.9, 26.5, 20.8 ppm.

**HRMS** (ESI): mass found: 212.07335, calculated mass for C<sub>10</sub>H<sub>14</sub>NO<sub>2</sub>S<sup>+</sup>: 212.07398.

**IR** (KBr): 3512, 3286, 3028, 2979, 2933, 2298, 2163, 2029, 1992, 1889, 1726, 1602, 1541, 1496, 1448, 1412, 1382, 1311, 1149, 1063, 1024, 966, 939, 875, 813, 768, 699, 661 cm<sup>-1</sup>.



#### 4-(2-Methyl-1-tosylaziridin-2-yl)pyridine (11p)

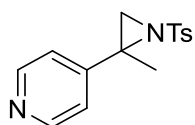

Compound **11r** was prepared according to the general procedure **GP2** and was obtained after column chromatography (*n*-hexane : ethyl acetate 20:1→9:1) as a colorless oil in 71% yield (41 mg).

**<sup>1</sup>H NMR** (400 MHz, CDCl<sub>3</sub>): δ = 8.55 (dd, *J* = 4.6, 1.4 Hz, 2H), 7.94 – 7.79 (m, 2H), 7.33 (d, *J* = 8.0 Hz, 2H), 7.27 (dd, *J* = 4.5, 1.6 Hz, 2H), 2.99 (s, 1H), 2.43 (s, 3H), 2.42 (s, 1H), 2.05 (s, 3H) ppm.

**<sup>13</sup>C NMR** (101 MHz, CDCl<sub>3</sub>): δ = 150.0, 149.5, 144.3, 137.2, 129.6, 127.4, 121.1, 49.6, 42.0, 21.6, 19.1 ppm.

**HRMS** (ESI): mass found: 289.10044, calculated mass for C<sub>15</sub>H<sub>17</sub>N<sub>2</sub>O<sub>2</sub>S<sup>+</sup>: 289.10053.

**IR** (KBr): 3405, 3125, 3056, 2972, 2923, 2869, 2431, 2261, 2162, 2033, 1982, 1906, 1735, 1637, 1598, 1560, 1496, 1454, 1410, 1381, 1323, 1157, 1085, 939, 815, 713, 659 cm<sup>-1</sup>.

#### 2-(2-Methyl-1-tosylaziridin-2-yl)pyridine (11q)

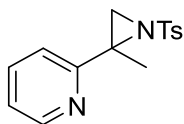

Compound **11s** was prepared according to the general procedure **GP2** and was obtained after column chromatography (*n*-hexane : ethyl acetate 20:1→9:1) as a white solid in 55% yield (32 mg).

**<sup>1</sup>H NMR** (600 MHz, CDCl<sub>3</sub>): δ = 8.45 (d, *J* = 4.7 Hz, 1H), 7.81 (d, *J* = 8.0 Hz, 2H), 7.59 (t, *J* = 7.7 Hz, 1H), 7.41 (d, *J* = 7.9 Hz, 1H), 7.26 (d, *J* = 8.0 Hz, 2H), 7.12 (dd, *J* = 7.4, 4.9 Hz, 1H), 2.93 (s, 1H), 2.61 (s, 1H), 2.37 (s, 3H), 2.07 (s, 3H) ppm.

**<sup>13</sup>C NMR** (151 MHz, CDCl<sub>3</sub>): δ = 159.1, 148.8, 144.1, 137.6, 136.8, 129.6, 127.5, 122.7, 121.2, 51.9, 41.7, 21.6, 18.4 ppm.

**HRMS** (ESI): mass found: 289.10007, calculated mass for C<sub>15</sub>H<sub>17</sub>N<sub>2</sub>O<sub>2</sub>S<sup>+</sup>: 289.10053.

**IR** (KBr): 3356, 3262, 3062, 2926, 2163, 1914, 1728, 1591, 1442, 1386, 1319, 1157, 1091, 1017, 941, 903, 863, 799, 752, 718, 681, 661 cm<sup>-1</sup>.

#### 2-(4-Chlorophenyl)-2-ethyl-1-tosylaziridine (11r)

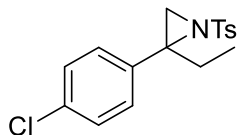

Compound **11p** was prepared according to the general procedure **GP2** and was obtained after column chromatography (*n*-hexane : ethyl acetate 20:1→9:1) as a colorless oil in 92% yield (62 mg).

**<sup>1</sup>H NMR** (400 MHz, CDCl<sub>3</sub>): δ = 7.79 (d, *J* = 8.3 Hz, 2H), 7.36 – 7.21 (m, 6H), 2.78 (s, 1H), 2.60 (s, 1H), 2.40 (s, 3H), 2.39 – 2.29 (m, 1H), 2.26 – 2.12 (m, 1H), 0.92 (t, *J* = 7.4 Hz, 3H) ppm.

$^{13}\text{C}$  NMR (101 MHz,  $\text{CDCl}_3$ ):  $\delta = 144.0, 137.3, 136.7, 133.7, 129.5, 129.4, 128.4, 127.4, 57.0, 39.8, 28.6, 21.5, 10.8$  ppm.

**HRMS** (ESI): mass found: 358.06387, calculated mass for  $\text{C}_{17}\text{H}_{18}\text{ClNO}_2\text{SNa}^+$ : 358.06390.

**IR** (KBr): 3065, 2973, 2931, 2880, 2164, 2028, 1910, 1733, 1597, 1492, 1457, 1399, 1368, 1321, 1253, 1157, 1089, 1047, 1015, 941, 870, 817, 737, 705, 656  $\text{cm}^{-1}$ .

### 2-(*tert*-Butyl)-2-phenyl-1-tosylaziridine (**11s**)

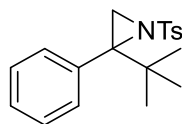

Compound **11q** was prepared according to the general procedure **GP2** and was obtained after column chromatography (*n*-hexane : ethyl acetate 20:1→9:1) as a white solid in 95% yield (63 mg).

$^1\text{H}$  NMR (400 MHz,  $\text{CDCl}_3$ ):  $\delta = 7.74$  (d,  $J = 8.3$  Hz, 2H), 7.64 – 7.45 (m, 2H), 7.35 – 7.29 (m, 3H), 7.28 – 7.22 (m, 2H), 2.78 (s, 1H), 2.57 (s, 1H), 2.40 (s, 3H), 0.95 (s, 9H) ppm.

$^{13}\text{C}$  NMR (101 MHz,  $\text{CDCl}_3$ ):  $\delta = 143.5, 137.4, 134.8, 131.3, 129.3, 128.1, 127.6, 127.1, 63.2, 37.3, 35.4, 26.5, 21.5$  ppm.

**HRMS** (ESI): mass found: 352.13386, calculated mass for  $\text{C}_{19}\text{H}_{23}\text{NO}_2\text{SNa}^+$ : 352.13417.

**IR** (KBr): 3270, 3033, 2964, 2923, 2867, 2607, 2292, 2195, 2161, 2087, 2033, 1988, 1913, 1721, 1598, 1488, 1447, 1391, 1363, 1318, 1193, 1157, 1093, 1024, 950, 857, 812, 753, 704, 669  $\text{cm}^{-1}$ .

### 1-Phenyl-7-tosyl-7-azabicyclo[4.1.0]heptane (**11t**)

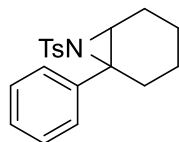

Compound **11t** was prepared according to the general procedure **GP2** and was obtained after column chromatography (*n*-hexane : ethyl acetate 20:1→9:1) as a colorless oil in 86% yield (60 mg).

$^1\text{H}$  NMR (400 MHz,  $\text{CDCl}_3$ ):  $\delta = 7.61$  (d,  $J = 8.2$  Hz, 2H), 7.40 – 7.35 (m, 2H), 7.31 – 7.28 (m, 3H), 7.21 (d,  $J = 8.3$  Hz, 2H), 3.54 (d,  $J = 5.4$  Hz, 1H), 2.53 (dt,  $J = 14.3, 4.7$  Hz, 1H), 2.39 (s, 3H), 2.10 – 1.91 (m, 1H), 1.81 – 1.62 (m, 2H), 1.62 – 1.55 (m, 1H), 1.54 – 1.43 (m, 1H), 1.43 – 1.32 (m, 1H), 1.30 – 1.13 (m, 1H) ppm.

$^{13}\text{C}$  NMR (101 MHz,  $\text{CDCl}_3$ ):  $\delta = 143.3, 137.8, 137.5, 129.2, 128.4, 128.2, 128.1, 127.4, 56.4, 43.9, 33.4, 22.8, 21.5, 19.8, 19.7$  ppm.

**HRMS** (ESI): mass found: 350.11801, calculated mass for  $\text{C}_{19}\text{H}_{21}\text{NO}_2\text{SNa}^+$ : 350.11852.

**IR** (KBr): 3518, 3261, 3058, 3030, 2935, 2863, 2725, 2306, 2162, 2022, 1918, 1720, 1657, 1597, 1494, 1445, 1414, 1321, 1153, 1088, 997, 918, 879, 811, 757, 695, 665  $\text{cm}^{-1}$ .

### 1-Methyl-6-tosyl-6-azabicyclo[3.1.0]hexane (**11u**)

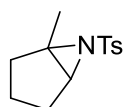

Compound **11u** was prepared according to the general procedure **GP2** and was obtained after column chromatography (*n*-hexane : ethyl acetate 20:1→9:1) as a colorless oil in 75% yield (38 mg).

**<sup>1</sup>H NMR** (400 MHz, CDCl<sub>3</sub>): δ = 7.79 (d, *J* = 8.1 Hz, 2H), 7.27 (d, *J* = 8.0 Hz, 2H), 3.29 (s, 1H), 2.40 (s, 3H), 2.09 – 1.97 (m, 1H), 1.83 (s, 3H), 1.76 (dd, *J* = 13.4, 7.8 Hz, 1H), 1.69 – 1.56 (m, 1H), 1.56 – 1.45 (m, 2H), 1.45 – 1.28 (m, 1H) ppm.

**<sup>13</sup>C NMR** (101 MHz, CDCl<sub>3</sub>): δ = 143.3, 138.7, 129.3, 126.9, 58.5, 53.1, 34.8, 27.7, 21.5, 20.4, 14.9 ppm.

**HRMS** (ESI): mass found: 274.08670, calculated mass for C<sub>13</sub>H<sub>17</sub>NO<sub>2</sub>SNa<sup>+</sup>: 274.08722.

**IR** (KBr): 3626, 2957, 2162, 2032, 1916, 1722, 1598, 1495, 1452, 1395, 1312, 1230, 1152, 1083, 1007, 959, 896, 859, 814, 715, 678 cm<sup>-1</sup>.

### 2-Methyl-2-(phenylethynyl)-1-tosylaziridine (**11v**)

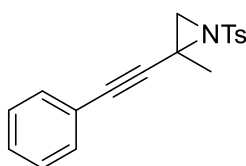

Compound **11v** was prepared according to the general procedure **GP2** and was obtained after column chromatography (*n*-hexane : ethyl acetate 20:1→9:1) as a light yellow oil in 35% yield (22 mg).

**<sup>1</sup>H NMR** (600 MHz, CDCl<sub>3</sub>): δ = 7.99 – 7.82 (m, 2H), 7.55 – 7.44 (m, 2H), 7.39 – 7.30 (m, 5H), 3.02 (s, 1H), 2.58 (s, 1H), 2.46 (s, 3H), 1.74 (s, 3H) ppm.

**<sup>13</sup>C NMR** (151 MHz, CDCl<sub>3</sub>): δ = 144.2, 136.6, 131.8, 129.5, 128.7, 128.2, 127.9, 122.1, 90.4, 88.6, 41.9, 38.8, 23.5, 21.6 ppm.

**HRMS** (ESI): mass found: 334.08700, calculated mass for C<sub>18</sub>H<sub>17</sub>NO<sub>2</sub>SNa<sup>+</sup>: 334.08722.

**IR** (KBr): 3510, 3283, 3059, 2982, 2927, 2324, 2179, 1928, 1810, 1727, 1673, 1596, 1570, 1491, 1445, 1326, 1271, 1158, 1089, 1027, 933, 819, 756, 737, 690 cm<sup>-1</sup>.

### 2-Cyclopentyl-2-methyl-1-tosylaziridine (**11w**)

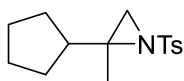

Compound **11w** was prepared according to the general procedure **GP2** and was obtained after column chromatography (*n*-hexane : ethyl acetate 20:1→9:1) as a colorless oil in 78% yield (44 mg).

**<sup>1</sup>H NMR** (600 MHz, CDCl<sub>3</sub>): δ = 7.84 (d, *J* = 8.2 Hz, 2H), 7.32 (d, *J* = 8.0 Hz, 2H), 2.60 (s, 1H), 2.45 (s, 3H), 2.27 (s, 1H), 2.13 – 1.96 (m, 1H), 1.85 – 1.75 (m, 1H), 1.70 (s, 3H), 1.65 – 1.56 (m, 3H), 1.57 – 1.48 (m, 2H), 1.43 – 1.33 (m, 1H), 1.32 – 1.21 (m, 1H) ppm.

**<sup>13</sup>C NMR** (151 MHz, CDCl<sub>3</sub>): δ = 143.5, 138.2, 129.4, 127.3, 52.5, 46.0, 40.0, 28.9, 27.5, 25.5, 25.4, 21.5, 17.5 ppm.

**HRMS** (ESI): mass found: 302.11826, calculated mass for C<sub>15</sub>H<sub>21</sub>NO<sub>2</sub>SNa<sup>+</sup>: 302.11852.

**IR** (KBr): 2952, 2870, 2584, 2167, 2035, 1916, 1737, 1598, 1493, 1453, 1387, 1317, 1232, 1156, 1090, 1019, 977, 938, 860, 816, 751, 708, 687, 656 cm<sup>-1</sup>.

### 2-Cyclohexyl-2-methyl-1-tosylaziridine (11x)

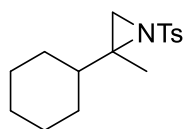

Compound **11x** was prepared according to the general procedure **GP2** and was obtained after column chromatography (*n*-hexane : ethyl acetate 20:1→9:1) as a colorless oil in 75% yield (44 mg).

**<sup>1</sup>H NMR** (600 MHz, CDCl<sub>3</sub>): δ = 7.87 – 7.83 (m, 2H), 7.33 (d, *J* = 8.0 Hz, 2H), 2.61 (s, 1H), 2.45 (s, 3H), 2.23 (s, 1H), 1.85 – 1.74 (m, 3H), 1.71 – 1.65 (m, 2H), 1.63 (s, 3H), 1.31 – 1.06 (m, 6H) ppm.

**<sup>13</sup>C NMR** (151 MHz, CDCl<sub>3</sub>): δ = 143.6, 138.2, 129.4, 127.3, 54.4, 46.1, 41.0, 28.7, 28.6, 26.24, 26.22, 26.0, 21.5, 14.7 ppm.

**HRMS** (ESI): mass found: 294.15167, calculated mass for C<sub>16</sub>H<sub>24</sub>NO<sub>2</sub>S<sup>+</sup>: 294.15223.

**IR** (KBr): 3046, 2982, 2927, 2853, 2664, 2324, 2178, 2047, 2000, 1911, 1800, 1725, 1597, 1537, 1491, 1446, 1388, 1306, 1225, 1150, 1111, 1086, 1001, 948, 883, 834, 741, 692 cm<sup>-1</sup>.

### 2-Methyl-2-(tetrahydro-2H-pyran-4-yl)-1-tosylaziridine (11y)

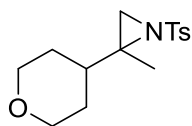

Compound **11y** was prepared according to the general procedure **GP2** and was obtained after column chromatography (*n*-hexane : ethyl acetate 4:1→2:1) as a colorless oil in 60% yield (35 mg).

**<sup>1</sup>H NMR** (400 MHz, CDCl<sub>3</sub>): δ = 7.81 (d, *J* = 7.9 Hz, 2H), 7.31 (d, *J* = 8.1 Hz, 2H), 4.10 – 3.89 (m, 2H), 3.60 – 3.14 (m, 2H), 2.60 (s, 1H), 2.43 (s, 3H), 2.25 (s, 1H), 1.65 (s, 3H), 1.63 – 1.42 (m, 5H) ppm.

**<sup>13</sup>C NMR** (101 MHz, CDCl<sub>3</sub>): δ = 143.8, 137.9, 129.4, 127.3, 67.7, 67.6, 52.9, 42.6, 40.0, 28.5, 28.2, 21.5, 15.3 ppm.

**HRMS** (ESI): mass found: 318.11313, calculated mass for C<sub>15</sub>H<sub>21</sub>NO<sub>3</sub>SN<sup>+</sup>: 318.11344.

**IR** (KBr): 3356, 3260, 2949, 2845, 2756, 2691, 2589, 2165, 2032, 1918, 1735, 1657, 1598, 1527, 1496, 1449, 1388, 1298, 1241, 1150, 1086, 1014, 956, 905, 867, 836, 813, 754, 694, 657 cm<sup>-1</sup>.

### 2-(*tert*-Butyl)-2-methyl-1-tosylaziridine (11z)

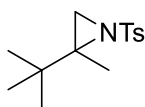

Compound **11z** was prepared according to the general procedure **GP2** and was obtained after column chromatography (*n*-hexane : ethyl acetate 20:1→9:1) as a colorless oil in 95% yield (51 mg).

**<sup>1</sup>H NMR** (600 MHz, CDCl<sub>3</sub>): δ = 7.85 (d, *J* = 8.2 Hz, 2H), 7.32 (d, *J* = 8.1 Hz, 2H), 2.54 (s, 1H), 2.45 (s, 3H), 2.35 (s, 1H), 1.74 (s, 3H), 0.95 (s, 9H) ppm.

$^{13}\text{C}$  NMR (151 MHz,  $\text{CDCl}_3$ ):  $\delta = 143.5, 138.4, 129.3, 127.3, 56.1, 38.6, 34.6, 25.9, 21.5, 14.9$  ppm.

**HRMS** (ESI): mass found: 290.11834, calculated mass for  $\text{C}_{14}\text{H}_{21}\text{NO}_2\text{SNa}^+$ : 290.11852.

**IR** (KBr): 2966, 2875, 2177, 1919, 1735, 1599, 1460, 1386, 1316, 1210, 1156, 1113, 1069, 1042, 1005, 945, 901, 830, 709, 660  $\text{cm}^{-1}$ .

### 2-Methyl-2-(1-phenylethyl)-1-tosylaziridine (**11aa**)

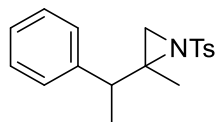

Compound **11aa** was prepared according to the general procedure **GP2** and was obtained after column chromatography (*n*-hexane : ethyl acetate 20:1→9:1) as a colorless oil in 80% yield (50 mg); d.r.56:44.

$^1\text{H}$  NMR (600 MHz,  $\text{CDCl}_3$ ):  $\delta = 7.88$  (d,  $J = 8.2$  Hz, 1.53H) and 7.83 (d,  $J = 8.2$  Hz, 1.96H), 7.39 – 7.30 (m, 5.25H) and 7.30 – 7.19 (m, 7.41H), 2.85 (q,  $J = 7.2$  Hz, 1.01H) and 2.70 (q,  $J = 7.1$  Hz, 0.81H), 2.67 (s, 0.81H), and 2.66 (s, 1.00H), 2.51 (s, 0.81H), 2.48 (s, 2.37H) and 2.46 (s, 3.00H), 2.17 (s, 1.03H), 1.64 (s, 3.09H) and 1.57 (s, 2.42H), 1.42 (d,  $J = 7.1$  Hz, 2.32H) and 1.34 (d,  $J = 7.2$  Hz, 3.02H) ppm.

$^{13}\text{C}$  NMR (151 MHz,  $\text{CDCl}_3$ ):  $\delta = 143.8$  and 143.7, 141.6 and 141.5, 138.0 and 137.9, 129.5 and 129.4, 128.4 and 128.1, 128.0 and 127.9, 127.47 and 127.40, 126.9 and 126.7, 54.3 and 53.8, 46.8 and 46.0, 41.3 and 39.2, 21.6 and 21.5, 16.1 and 15.7, 15.7 and 14.2 ppm.

**HRMS** (ESI): mass found: 338.11871, calculated mass for  $\text{C}_{18}\text{H}_{21}\text{NO}_2\text{SNa}^+$ : 338.11852.

**IR** (KBr): 3523, 3061, 3030, 2970, 2928, 2161, 2032, 1915, 1808, 1728, 1599, 1494, 1453, 1382, 1318, 1262, 1157, 1090, 1020, 986, 941, 897, 822, 773, 706, 659  $\text{cm}^{-1}$ .

### 2-Benzyl-2-methyl-1-tosylaziridine (**11ab**)

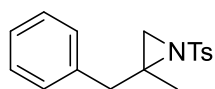

Compound **11ab** was prepared according to the general procedure **GP2** and was obtained after column chromatography (*n*-hexane : ethyl acetate 20:1→9:1) as a colorless oil in 84% yield (51 mg).

$^1\text{H}$  NMR (600 MHz,  $\text{CDCl}_3$ ):  $\delta = 7.89 - 7.81$  (m, 2H), 7.34 (d,  $J = 8.0$  Hz, 2H), 7.32 – 7.28 (m, 2H), 7.28 – 7.24 (m, 1H), 7.23 – 7.19 (m, 2H), 2.97 (s, 2H), 2.63 (s, 1H), 2.47 (s, 3H), 2.44 (s, 1H), 1.60 (s, 3H) ppm.

$^{13}\text{C}$  NMR (151 MHz,  $\text{CDCl}_3$ ):  $\delta = 143.8, 137.8, 136.8, 129.52, 129.51, 128.3, 127.4, 126.8, 50.8, 44.0, 40.3, 21.6, 18.4$  ppm.

**HRMS** (ESI): mass found: 324.10217, calculated mass for  $\text{C}_{17}\text{H}_{19}\text{NO}_2\text{SNa}^+$ : 324.10287.

**IR** (KBr): 3541, 3062, 3030, 2926, 2322, 2163, 2036, 1991, 1920, 1809, 1725, 1598, 1494, 1452, 1386, 1316, 1155, 1089, 1029, 951, 821, 761, 704  $\text{cm}^{-1}$ .

### 2-methyl-2-phenethyl-1-tosylaziridine (**11ac**)

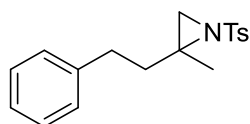

Compound **11ac** was prepared according to the general procedure **GP2** and was obtained after column chromatography (*n*-hexane : ethyl acetate 20:1→9:1) as a colorless oil in 87% yield (55 mg).

**<sup>1</sup>H NMR** (600 MHz, CDCl<sub>3</sub>): δ = 7.86 (d, *J* = 8.3 Hz, 2H), 7.34 (d, *J* = 8.0 Hz, 2H), 7.32 – 7.27 (m, 2H), 7.20 (dd, *J* = 14.5, 7.2 Hz, 3H), 2.87 – 2.69 (m, 2H), 2.58 (s, 1H), 2.46 (s, 3H), 2.28 (s, 1H), 2.03 (ddd, *J* = 13.8, 10.7, 6.5 Hz, 1H), 1.93 (ddd, *J* = 13.9, 10.5, 5.5 Hz, 1H), 1.74 (s, 3H) ppm.

**<sup>13</sup>C NMR** (151 MHz, CDCl<sub>3</sub>): δ = 143.8, 141.2, 138.0, 129.5, 128.4, 128.3, 127.3, 126.0, 50.5, 41.4, 39.6, 32.0, 21.5, 18.6 ppm.

**HRMS** (ESI): mass found: 338.11777, calculated mass for C<sub>18</sub>H<sub>21</sub>NO<sub>2</sub>SNa<sup>+</sup>: 338.11852.

**IR** (KBr): 3538, 3062, 3028, 2929, 2863, 2180, 2033, 1920, 1808, 1724, 1599, 1495, 1453, 1386, 1316, 1212, 1155, 1107, 1040, 946, 816, 737, 700 cm<sup>-1</sup>.

### 2-hexyl-2-methyl-1-tosylaziridine (**11ad**)

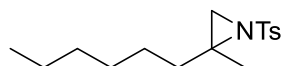

Compound **11ad** was prepared according to the general procedure **GP2** and was obtained after column chromatography (*n*-hexane : ethyl acetate 20:1→9:1) as a colorless oil in 89% yield (53 mg).

**<sup>1</sup>H NMR** (600 MHz, CDCl<sub>3</sub>): δ = 7.85 (d, *J* = 8.3 Hz, 2H), 7.33 (d, *J* = 8.1 Hz, 2H), 2.57 (s, 1H), 2.45 (s, 3H), 2.30 (s, 1H), 1.70 – 1.65 (m, 1H), 1.64 (s, 3H), 1.63 – 1.56 (m, 1H), 1.49 – 1.35 (m, 2H), 1.35 – 1.24 (m, 6H), 0.90 (t, *J* = 7.0 Hz, 3H) ppm.

**<sup>13</sup>C NMR** (151 MHz, CDCl<sub>3</sub>): δ = 143.6, 138.1, 129.4, 127.3, 51.1, 41.4, 37.8, 31.6, 29.0, 25.7, 22.5, 21.5, 18.6, 14.0 ppm.

**HRMS** (ESI): mass found: 318.14923, calculated mass for C<sub>16</sub>H<sub>25</sub>NO<sub>2</sub>SNa<sup>+</sup>: 318.14982.

**IR** (KBr): 2928, 2860, 2324, 2191, 2086, 1986, 1733, 1599, 1458, 1384, 1318, 1213, 1157, 1093, 1057, 1034, 946, 824, 741, 705, 677 cm<sup>-1</sup>.

### 2-Ethyl-2-phenyl-1-tosylaziridine (**14**)

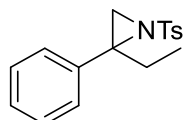

Compound **14** was prepared according to the general procedure **GP2** and was obtained after column chromatography (*n*-hexane : ethyl acetate 20:1→9:1) as a colorless oil in 92% yield (56 mg).

**<sup>1</sup>H NMR** (400 MHz, CDCl<sub>3</sub>): δ = 7.80 (d, *J* = 8.2 Hz, 2H), 7.49 – 7.19 (m, 7H), 2.80 (s, 1H), 2.63 (d, *J* = 0.7 Hz, 1H), 2.46 – 2.33 (m, 4H), 2.23 (dq, *J* = 14.8, 7.5 Hz, 1H), 0.94 (t, *J* = 7.4 Hz, 3H) ppm.

$^{13}\text{C}$  NMR (101 MHz,  $\text{CDCl}_3$ ):  $\delta = 143.8, 138.3, 137.5, 129.4, 128.1, 128.0, 127.8, 127.5, 57.8, 39.8, 28.6, 21.5, 10.9$  ppm.

**HRMS** (ESI): mass found: 324.10137, calculated mass for  $\text{C}_{17}\text{H}_{19}\text{NNaO}_2\text{S}^+$ : 324.10287.

**IR** (KBr): 3285, 3061, 3032, 2973, 2933, 2880, 2325, 2160, 2030, 1913, 1811, 1731, 1685, 1598, 1494, 1452, 1365, 1319, 1256, 1157, 1093, 1047, 1027, 994, 945, 868, 840, 814, 766, 720, 699, 658  $\text{cm}^{-1}$ .

#### (2R,3R)-2-Methyl-3-phenyl-1-tosylaziridine (20a)

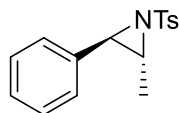

Compound **20a** was prepared from *Z*- $\beta$ -methyl styrene according to the general procedure **GP1** and was obtained after column chromatography (*n*-hexane : ethyl acetate 20:1 $\rightarrow$ 9:1) as a yellow oil in 89% yield (51 mg); d.r.81:19.

Compound **20a** was prepared from *E*- $\beta$ -methyl styrene according to the general procedure **GP1** and was obtained after column chromatography (*n*-hexane : ethyl acetate 20:1 $\rightarrow$ 9:1) as a yellow oil in 82% yield (47 mg); d.r. 91:9.

Compound **20a** was prepared from *Z*- $\beta$ -methyl styrene according to the general procedure **GP2** and was obtained after column chromatography (*n*-hexane : ethyl acetate 20:1 $\rightarrow$ 9:1) as a yellow oil in 93% yield (53 mg); d.r.85:15.

Compound **20a** was prepared from *E*- $\beta$ -methyl styrene according to the general procedure **GP2** and was obtained after column chromatography (*n*-hexane : ethyl acetate 20:1 $\rightarrow$ 9:1) as a yellow oil in 96% yield (55 mg); d.r. 93:7.

$^1\text{H}$  NMR (600 MHz,  $\text{CDCl}_3$ ):  $\delta = 7.88$  (d,  $J = 8.2$  Hz, 0.17H) and 7.85 – 7.76 (m, 1.86H), 7.33 (d,  $J = 8.0$  Hz, 0.23H) and 7.25 (dt,  $J = 9.4, 4.9$  Hz, 5.31H), 7.23 – 7.18 (m, 0.20H) and 7.14 (dd,  $J = 7.6, 2.1$  Hz, 1.95H), 3.92 (d,  $J = 7.3$  Hz, 0.09H) and 3.79 (d,  $J = 4.3$  Hz, 0.95H), 3.19 (dq,  $J = 7.4, 5.9$  Hz, 0.08H) and 2.91 (qd,  $J = 6.0, 4.1$  Hz, 0.96H), 2.43 (s, 0.32H) and 2.39 (s, 3.00H), 1.84 (d,  $J = 6.0$  Hz, 3.14H) and 1.02 (d,  $J = 5.8$  Hz, 0.29H) ppm.

$^{13}\text{C}$  NMR (151 MHz,  $\text{CDCl}_3$ ):  $\delta = 144.4$  and 143.8, 137.8, 135.5, 129.7 and 129.5, 128.4 and 128.2, 128.0 and 127.8, 127.5 and 127.1, 126.2, 49.18 and 41.5, 49.12 and 46.0, 21.5, 14.1 and 11.9 ppm.

**HRMS** (ESI): mass found: 288.10541, calculated mass for  $\text{C}_{16}\text{H}_{18}\text{NO}_2\text{S}^+$ : 288.10528.

**IR** (KBr): 3367, 3033, 2927, 2859, 2678, 2325, 2166, 2108, 1914, 1810, 1729, 1677, 1598, 1496, 1454, 1410, 1319, 1240, 1157, 1089, 1037, 970, 887, 814, 748, 684  $\text{cm}^{-1}$ .

#### (2R,3R)-2-(4-Bromophenyl)-3-methyl-1-tosylaziridine (20b)

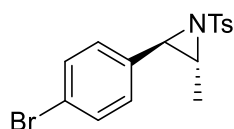

Compound **20b** was prepared according to the general procedure **GP1** and was obtained after column chromatography (*n*-hexane : ethyl acetate 20:1 $\rightarrow$ 9:1) as a colorless oil in 70% yield (51 mg); d.r.75:25. (from crude NMR)

Compound **20b** was prepared according to the general procedure **GP2** and was obtained after column chromatography (*n*-hexane : ethyl acetate 20:1→9:1) as a colorless oil in 79% yield (58 mg); d.r.78:22. (from crude NMR)

Main product:

**<sup>1</sup>H NMR** (600 MHz, CDCl<sub>3</sub>): δ = 7.83 (d, *J* = 8.2 Hz, 2H), 7.39 (d, *J* = 8.4 Hz, 2H), 7.29 (d, *J* = 7.3 Hz, 2H), 7.03 (d, *J* = 8.4 Hz, 2H), 3.76 (d, *J* = 4.2 Hz, 2H), 3.00 – 2.78 (m, 2H), 2.42 (s, 3H), 1.85 (d, *J* = 6.0 Hz, 3H) ppm.

**<sup>13</sup>C NMR** (151 MHz, CDCl<sub>3</sub>): δ = 144.1, 137.7, 134.7, 131.6, 129.6, 127.9, 127.2, 122.0, 49.2, 48.3, 21.6, 14.0 ppm.

**HRMS** (ESI): mass found: 387.99776, calculated mass for C<sub>16</sub>H<sub>16</sub>BrNO<sub>2</sub>SNa<sup>+</sup>: 387.99773.

**IR** (KBr): 3551, 2977, 2930, 2174, 2007, 1913, 1596, 1489, 1449, 1421, 1398, 1236, 1156, 1089, 1040, 1010, 976, 885, 815, 775, 736, 709, 680 cm<sup>-1</sup>.

### (2R,3R)-2-Methyl-1-tosyl-3-(4-(trifluoromethyl)phenyl)aziridine (**20c**)

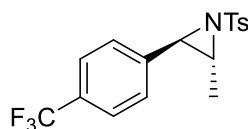

Compound **20c** was prepared according to the general procedure **GP1** and was obtained after column chromatography (*n*-hexane : ethyl acetate 20:1→9:1) as a colorless oil in 80% yield (57 mg); d.r.86:14. (from crude NMR)

Compound **20c** was prepared according to the general procedure **GP2** and was obtained after column chromatography (*n*-hexane : ethyl acetate 20:1→9:1) as a colorless oil in 90% yield (64 mg); d.r.88:12. (from crude NMR)

Main product:

**<sup>1</sup>H NMR** (600 MHz, CDCl<sub>3</sub>): δ = 7.93 – 7.65 (m, 2H), 7.62 – 7.39 (m, 2H), 7.29 (dd, *J* = 14.1, 7.6 Hz, 4H), 3.85 (d, *J* = 4.2 Hz, 1H), 3.13 – 2.68 (m, 1H), 2.43 (s, 3H), 1.88 (d, *J* = 6.0 Hz, 3H) ppm.

**<sup>13</sup>C NMR** (151 MHz, CDCl<sub>3</sub>): δ = 144.2, 139.7, 137.6, 130.2 (q, *J* = 32.6 Hz), 129.6, 127.2, 126.4, 125.5 (q, *J* = 3.6 Hz), 123.9 (q, *J* = 272.3 Hz), 49.5, 48.1, 21.59, 14.0 ppm.

**<sup>19</sup>F NMR** (565 MHz, CDCl<sub>3</sub>): δ = -62.65 ppm.

**HRMS** (ESI): mass found: 394.04830, calculated mass for C<sub>17</sub>H<sub>16</sub>F<sub>3</sub>NO<sub>2</sub>SK<sup>+</sup>: 394.04854.

**IR** (KBr): 3338, 2927, 2174, 1921, 1619, 1598, 1495, 1431, 1405, 1320, 1238, 1158, 1120, 1064, 977, 890, 852, 819, 737, 707, 682 cm<sup>-1</sup>.

### (2R,3R)-2-Methyl-1-tosyl-3-(4-(trifluoromethoxy)phenyl)aziridine (**20d**)

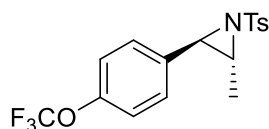

Compound **20d** was prepared according to the general procedure **GP1** and was obtained after column chromatography (*n*-hexane : ethyl acetate 20:1→9:1) as a colorless oil in 75% yield (54 mg); d.r.82:18. (from crude NMR)



Compound **20d** was prepared according to the general procedure **GP2** and was obtained after column chromatography (*n*-hexane : ethyl acetate 20:1→9:1) as a colorless oil in 89% yield (64 mg); d.r.86:14. (from crude NMR)

Main product:

**<sup>1</sup>H NMR** (600 MHz, CDCl<sub>3</sub>): δ = 7.84 (d, *J* = 8.2 Hz, 2H), 7.30 (d, *J* = 8.1 Hz, 2H), 7.19 (d, *J* = 8.6 Hz, 2H), 7.12 (d, *J* = 8.4 Hz, 2H), 3.81 (d, *J* = 4.2 Hz, 1H), 3.02 – 2.75 (m, 1H), 2.43 (s, 3H), 1.86 (d, *J* = 6.0 Hz, 3H) ppm.

**<sup>13</sup>C NMR** (151 MHz, CDCl<sub>3</sub>): δ = 148.9, 144.1, 137.7, 134.3, 129.6, 127.7, 127.2, 121.0, 120.3 (q, *J* = 257.6 Hz), 49.2, 48.1, 21.5, 14.0 ppm.

**<sup>19</sup>F NMR** (565 MHz, CDCl<sub>3</sub>): δ = -57.91 ppm.

**HRMS** (ESI): mass found: 394.06938, calculated mass for C<sub>17</sub>H<sub>16</sub>F<sub>3</sub>NO<sub>3</sub>SNa<sup>+</sup>: 394.06952.

**IR** (KBr): 2934, 2327, 2176, 1913, 1597, 1510, 1449, 1403, 1322, 1255, 1219, 1155, 1091, 1040, 976, 890, 855, 816, 734, 682 cm<sup>-1</sup>.

### (2R,3R)-2-Methyl-1-tosyl-3-(3-(trifluoromethoxy)phenyl)aziridine (**20e**)

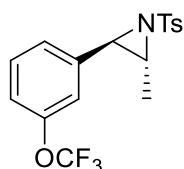

Compound **20e** was prepared according to the general procedure **GP1** and was obtained after column chromatography (*n*-hexane : ethyl acetate 20:1→9:1) as a colorless oil in 73% yield (54 mg); d.r.83:17. (from crude NMR)

Compound **20e** was prepared according to the general procedure **GP2** and was obtained after column chromatography (*n*-hexane : ethyl acetate 20:1→9:1) as a colorless oil in 87% yield (65 mg); d.r.85:15. (from crude NMR)

Main product:

**<sup>1</sup>H NMR** (600 MHz, CDCl<sub>3</sub>): δ = 7.93 – 7.76 (m, 2H), 7.36 – 7.26 (m, 3H), 7.14 – 7.08 (m, 2H), 6.96 (s, 1H), 3.80 (d, *J* = 4.2 Hz, 1H), 2.91 (qd, *J* = 6.0, 4.2 Hz, 1H), 2.43 (s, 3H), 1.87 (d, *J* = 6.0 Hz, 3H) ppm.

**<sup>13</sup>C NMR** (151 MHz, CDCl<sub>3</sub>): δ = 149.4, 144.2, 138.1, 137.6, 129.9, 129.6, 127.2, 124.7, 120.5, 120.3 (q, *J* = 257.4 Hz), 118.6, 49.4, 48.0, 21.5, 14.0 ppm.

**<sup>19</sup>F NMR** (565 MHz, CDCl<sub>3</sub>): δ = -57.88 ppm.

**HRMS** (ESI): mass found: 394.06960, calculated mass for C<sub>17</sub>H<sub>16</sub>F<sub>3</sub>NO<sub>3</sub>SNa<sup>+</sup>: 394.06952.

**IR** (KBr): 2979, 2931, 2667, 2327, 2176, 2105, 1997, 1916, 1595, 1492, 1450, 1407, 1324, 1253, 1215, 1156, 1089, 1042, 997, 958, 888, 810, 768, 686 cm<sup>-1</sup>.

### (2R,3R)-2-(2-Bromophenyl)-3-methyl-1-tosylaziridine (**20f**)

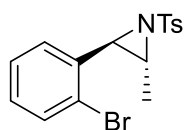

Compound **20f** was prepared according to the general procedure **GP1** and was obtained after ; column chromatography (*n*-hexane : ethyl acetate 20:1→9:1) as a colorless oil in 62% yield (46 mg); d.r.69:31.(from crude NMR)

Compound **20f** was prepared according to the general procedure **GP2** and was obtained after column chromatography (*n*-hexane : ethyl acetate 20:1→9:1) as a colorless oil in 72% yield (53 mg); d.r.74:26.(from crude NMR)

**<sup>1</sup>H NMR** (600 MHz, CDCl<sub>3</sub>): δ = 7.94 – 7.92 (m, 0.64H) and 7.92 – 7.90 (m, 2.00H), 7.55 – 7.52 (m, 0.35H) and 7.53 – 7.50 (m, 0.95H), 7.38 (d, *J* = 8.0 Hz, 0.73H) and 7.34 (d, *J* = 8.0 Hz, 2.03H), 7.25 – 7.18 (m, 0.74H) and 7.15 – 7.09 (m, 2.09H), 7.17 (dd, *J* = 7.5, 2.1 Hz, 0.30H) and 6.87 (dd, *J* = 7.0, 2.3 Hz, 1.00H), 4.02 (d, *J* = 4.3 Hz, 0.98H) and 4.00 (d, *J* = 7.3 Hz, 0.36H), 3.32 (dq, *J* = 11.6, 5.8 Hz, 0.36H) and 2.78 (qd, *J* = 6.0, 4.4 Hz, 1.01H), 2.47 (s, 1.10H) and 2.46 (s, 3.00H), 1.93 (d, *J* = 6.0 Hz, 3.06H) and 1.00 (d, *J* = 5.8 Hz, 1.06H) ppm.

**<sup>13</sup>C NMR** (151 MHz, CDCl<sub>3</sub>): δ = 144.6 and 144.2, 137.6 and 135.5, 135.1 and 132.8, 132.2 and 129.9, 129.8 and 129.6, 129.38 and 129.31, 127.9 and 127.5, 127.4 and 127.2, 123.1 and 122.9, 49.4 and 48.9, 47.0 and 41.8, 21.68 and 21.64, 14.0 and 12.0 ppm.

**HRMS** (ESI): mass found: 387.99766, calculated mass for C<sub>16</sub>H<sub>16</sub>BrNO<sub>2</sub>SNa<sup>+</sup>: 387.99773.

**IR** (KBr): 3062, 2976, 2929, 2326, 2177, 2086, 1921, 1810, 1596, 1472, 1441, 1409, 1323, 1236, 1157, 1089, 1030, 982, 890, 813, 752, 711, 681 cm<sup>-1</sup>.

#### (2R,3R)-2-Ethyl-3-phenyl-1-tosylaziridine (**20g**)

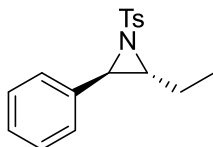

Compound **20g** was prepared according to the general procedure **GP1** and was obtained after column chromatography (*n*-hexane : ethyl acetate 20:1→9:1) as a colorless oil in 88% yield (53 mg); d.r.82:18.(from crude NMR)

Compound **20g** was prepared according to the general procedure **GP2** and was obtained after column chromatography (*n*-hexane : ethyl acetate 20:1→9:1) as a colorless oil in 93% yield (56 mg); d.r.88:12.(from crude NMR)

**<sup>1</sup>H NMR** (600 MHz, CDCl<sub>3</sub>): δ = 7.92 (d, *J* = 8.2 Hz, 0.26H) and 7.84 (d, *J* = 8.2 Hz, 1.95H), 7.32 – 7.24 (m, 5.80H), 7.36 (d, *J* = 8.0 Hz, 0.30H) and 7.17 (dd, *J* = 7.4, 1.8 Hz, 2.03H), 4.01 (d, *J* = 7.2 Hz, 0.13H) and 3.82 (d, *J* = 4.4 Hz, 0.99H), 3.04 (dd, *J* = 13.4, 7.4 Hz, 0.14H) and 2.85 (dt, *J* = 8.1, 5.2 Hz, 1.01H), 2.46 (s, 0.41H) and 2.41 (s, 3.00H), 2.36 – 2.24 (m, 1.06H) and 1.37 – 1.28 (m, 0.19H), 2.21 – 2.08 (m, 1.05H) and 1.28 – 1.22 (m, 0.17H), 1.19 (t, *J* = 7.5 Hz, 3.00H) and 0.81 (t, *J* = 7.5 Hz, 0.41H) ppm.

**<sup>13</sup>C NMR** (151 MHz, CDCl<sub>3</sub>): δ = 144.4 and 143.8, 137.8 and 135.5, 135.2 and 133.0, 129.6 and 129.5, 128.5 and 128.2, 128.06 and 128.02, 127.7 and 127.4, 127.2 and 126.4, 54.7 and 48.7, 47.7 and 46.0, 22.2 and 21.6, 21.5 and 19.8, 12.3 and 11.0 ppm.

**HRMS** (ESI): mass found: 324.10278, calculated mass for C<sub>17</sub>H<sub>19</sub>NO<sub>2</sub>SNa<sup>+</sup>: 324.10287.

**IR** (KBr): 3551, 3035, 2971, 2933, 2878, 2161, 2030, 1918, 1734, 1598, 1496, 1456, 1420, 1320, 1235, 1156, 1088, 1019, 903, 853, 812, 747, 691 cm<sup>-1</sup>.

**(2S,3S)-2,3-Dibutyl-1-tosylaziridine (20h)**

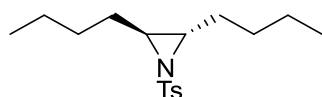

Compound **20h** was prepared from *trans*-5-Decen according to the general procedure **GP1** and was obtained after column chromatography (*n*-hexane : ethyl acetate 40:1→20:1) as a colorless oil in 71% yield (44 mg); d.r.73:27.(from crude NMR)

Compound **20h** was prepared from *trans*-5-Decen according to the general procedure **GP2** and was obtained after column chromatography (*n*-hexane : ethyl acetate 40:1→20:1) as a colorless oil in 76% yield (47 mg); d.r.75:25.(from crude NMR)

**<sup>1</sup>H NMR** (600 MHz, CDCl<sub>3</sub>): δ = 7.94 – 7.74 (m, 2.75H), 7.33 (t, *J* = 8.7 Hz, 2.81H), 2.84 – 2.73 (m, 0.70H) and 2.71 – 2.60 (m, 2.05H), 2.46 (s, 1.04H) and 2.45 (s, 3.00H), 1.83 – 1.65 (m, 4.31H), 1.54 – 1.46 (m, 0.89H), 1.46 – 1.18 (m, 12.65H), 1.10 – 0.78 (m, 8.85H) ppm.

**<sup>13</sup>C NMR** (151 MHz, CDCl<sub>3</sub>): δ = 144.1 and 143.7, 138.0 and 135.4, 129.4 and 129.3, 128.0 and 127.4, 49.8 and 45.2, 29.6 and 29.5, 29.4 and 26.4, 22.28 and 22.24, 21.58 and 21.56, 13.87 and 13.86 ppm.

**HRMS** (ESI): mass found: 332.16528, calculated mass for C<sub>17</sub>H<sub>27</sub>NO<sub>2</sub>SNa<sup>+</sup>: 332.16547.

**IR** (KBr): 3432, 2928, 2865, 2322, 2159, 2079, 1910, 1715, 1673, 1616, 1494, 1459, 1377, 1321, 1241, 1157, 1090, 1015, 951, 894, 813, 690 cm<sup>-1</sup>.

**(2S,3S)-2-Isopropyl-3-methyl-1-tosylaziridine (20i)**

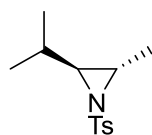

Compound **20i** was prepared according to the general procedure **GP1** and was obtained after column chromatography (*n*-hexane : ethyl acetate 20:1→9:1) as a colorless oil in 54% yield (27 mg); d.r.75:25.

Compound **20i** was prepared according to the general procedure **GP2** and was obtained after column chromatography (*n*-hexane : ethyl acetate 20:1→9:1) as a colorless oil in 68% yield (34 mg); d.r.80:20.

**<sup>1</sup>H NMR** (400 MHz, CDCl<sub>3</sub>): δ = 7.81 (t, *J* = 8.6 Hz, 2.22H), 7.29 (t, *J* = 7.2 Hz, 2.32H), 2.99 – 2.82 (m, 0.26H) and 2.73 – 2.59 (m, 0.94H), 2.51 (dd, *J* = 7.9, 4.6 Hz, 0.95H), 2.39 (d, *J* = 11.7 Hz, 4.01H), 1.62 (d, *J* = 6.0 Hz, 3.08H), 1.55 – 1.33 (m, 1.27H), 1.20 (d, *J* = 5.9 Hz, 0.82H), 0.89 (d, *J* = 6.8 Hz, 0.84H) and 0.86 (d, *J* = 6.8 Hz, 3.06H), 0.75 (d, *J* = 6.6 Hz, 0.81H) and 0.71 (d, *J* = 6.7 Hz, 3.00H) ppm.

**<sup>13</sup>C NMR** (101 MHz, CDCl<sub>3</sub>): δ = 144.1 and 143.7, 137.9 and 135.4, 129.8 and 129.3, 127.9 and 127.5, 55.0 and 51.4, 45.4 and 40.3, 30.1 and 26.3, 21.5 and 21.5, 20.7 and 19.8, 19.4 and 19.1, 14.3 and 11.9 ppm.

**HRMS** (ESI): mass found: 276.10229, calculated mass for C<sub>13</sub>H<sub>19</sub>NO<sub>2</sub>SNa<sup>+</sup>: 276.10287.

**IR** (KBr): 3854, 3632, 2963, 2874, 2730, 2325, 2179, 2092, 1992, 1808, 1599, 1460, 1387, 1317, 1246, 1155, 1089, 1057, 1024, 992, 947, 876, 814, 739, 708, 681 cm<sup>-1</sup>.

## 2-Phenyl-1-tosylaziridine (**22a**)

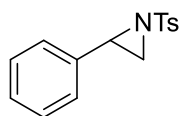

Compound **22a** was prepared according to the general procedure **GP1** and was obtained after column chromatography (*n*-hexane : ethyl acetate 20:1→9:1) as a white solid in 84% yield (46 mg).

Compound **22a** was prepared according to the general procedure **GP2** and was obtained after column chromatography (*n*-hexane : ethyl acetate 20:1→9:1) as a white solid in 90% yield (49 mg).

**<sup>1</sup>H NMR** (400 MHz, CDCl<sub>3</sub>): δ = 7.91 – 7.84 (m, 2H), 7.37 – 7.26 (m, 5H), 7.25 – 7.19 (m, 2H), 3.78 (dd, *J* = 7.2, 4.5 Hz, 1H), 2.99 (d, *J* = 7.2 Hz, 1H), 2.43 (s, 3H), 2.39 (d, *J* = 4.5 Hz, 1H) ppm.

**<sup>13</sup>C NMR** (101 MHz, CDCl<sub>3</sub>): δ = 144.6, 135.0, 134.9, 129.7, 128.5, 128.2, 127.9, 126.5, 41.0, 35.9, 21.6 ppm.

**HRMS** (ESI): mass found: 296.07123, calculated mass for C<sub>15</sub>H<sub>15</sub>NO<sub>2</sub>SNa<sup>+</sup>: 296.07157.

**IR** (KBr): 3482, 3037, 2926, 2859, 2586, 2318, 2040, 1896, 1815, 1727, 1687, 1595, 1494, 1456, 1387, 1319, 1232, 1190, 1156, 1117, 1091, 1028, 970, 908, 804, 780, 753, 691, 663 cm<sup>-1</sup>.

## 1-((4-Chlorophenyl)sulfonyl)-2-phenylaziridine (**22b**)

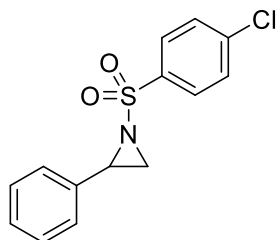

Compound **22b** was prepared according to the general procedure **GP1** and was obtained after column chromatography (*n*-hexane : ethyl acetate 20:1→9:1) as a white solid in 78% yield (46 mg).

Compound **22b** was prepared according to the general procedure **GP2** and was obtained after column chromatography (*n*-hexane : ethyl acetate 20:1→9:1) as a white solid in 87% yield (51 mg).

**<sup>1</sup>H NMR** (400 MHz, CDCl<sub>3</sub>): δ = 7.95 – 7.83 (m, 2H), 7.54 – 7.45 (m, 2H), 7.33 – 7.26 (m, 3H), 7.23 – 7.16 (m, 2H), 3.80 (dd, *J* = 7.2, 4.5 Hz, 1H), 3.01 (d, *J* = 7.2 Hz, 1H), 2.41 (d, *J* = 4.5 Hz, 1H) ppm.

**<sup>13</sup>C NMR** (101 MHz, CDCl<sub>3</sub>): δ = 140.3, 136.5, 134.6, 129.4, 129.3, 128.6, 128.4, 126.4, 41.3, 36.1 ppm.

**HRMS** (ESI): mass found: 316.01542, calculated mass for C<sub>14</sub>H<sub>12</sub>NCIO<sub>2</sub>SNa<sup>+</sup>: 316.01695.

**IR** (KBr): 3095, 3038, 2926, 2858, 2323, 2165, 2023, 1918, 1729, 1582, 1477, 1393, 1327, 1280, 1237, 1160, 1085, 1014, 937, 910, 830, 803, 761, 699 cm<sup>-1</sup>.

### 1-((3,5-bis(Trifluoromethyl)phenyl)sulfonyl)-2-phenylaziridine (**22c**)

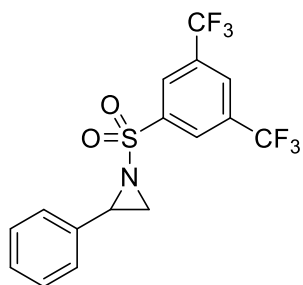

Compound **22c** was prepared according to the general procedure **GP1** and was obtained after column chromatography (*n*-hexane : ethyl acetate 20:1→9:1) as a white solid in 77% yield (61 mg).

Compound **22c** was prepared according to the general procedure **GP2** and was obtained after column chromatography (*n*-hexane : ethyl acetate 20:1→9:1) as a white solid in 80% yield (63 mg).

**<sup>1</sup>H NMR** (600 MHz, CDCl<sub>3</sub>): δ = 8.47 (s, 2H), 8.15 (s, 1H), 7.40 – 7.33 (m, 3H), 7.31 – 7.18 (m, 2H), 4.00 – 3.97 (m, 1H), 3.16 (d, *J* = 7.3 Hz, 1H), 2.59 (d, *J* = 4.6 Hz, 1H) ppm.

**<sup>13</sup>C NMR** (151 MHz, CDCl<sub>3</sub>): δ = 141.2, 133.9, 133.0 (q, *J* = 34.9 Hz), 128.89, 128.81, 128.1 (q, *J* = 3.2 Hz), 127.2 (m), 126.5, 122.3 (q, *J* = 273.4 Hz, 1H), 42.0, 36.8 ppm.

**<sup>19</sup>F NMR** (565 MHz, CDCl<sub>3</sub>): δ = -62.98 ppm.

**HRMS** (ESI): mass found: 396.04849, calculated mass for C<sub>16</sub>H<sub>12</sub>NF<sub>6</sub>O<sub>2</sub>S<sup>+</sup>: 396.04875.

**IR** (KBr): 3085, 2927, 2859, 2165, 1835, 1734, 1607, 1498, 1459, 1331, 1273, 1116, 1029, 976, 906, 838, 770, 726, 692 cm<sup>-1</sup>.

### 1-((3-Nitrophenyl)sulfonyl)-2-phenylaziridine (**22d**)

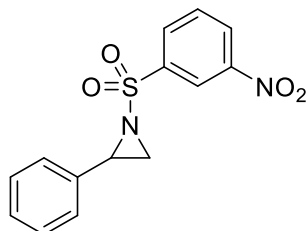

Compound **22d** was prepared according to the general procedure **GP1** and was obtained after column chromatography (*n*-hexane : ethyl acetate 9:1→4:1) as a white oil in 82% yield (50 mg).

Compound **22d** was prepared according to the general procedure **GP2** and was obtained after column chromatography (*n*-hexane : ethyl acetate 9:1→4:1) as a white oil in 85% yield (52 mg).

**<sup>1</sup>H NMR** (600 MHz, CDCl<sub>3</sub>): δ = 8.86 (s, 1H), 8.51 (d, *J* = 8.2 Hz, 1H), 8.35 (dd, *J* = 7.8, 0.8 Hz, 1H), 7.80 (t, *J* = 8.0 Hz, 1H), 7.53 – 7.29 (m, 3H), 7.28 – 7.08 (m, 2H), 3.95 (dd, *J* = 7.0, 4.8 Hz, 1H), 3.14 (d, *J* = 7.2 Hz, 1H), 2.54 (d, *J* = 4.6 Hz, 1H) ppm.

**<sup>13</sup>C NMR** (151 MHz, CDCl<sub>3</sub>): δ = 148.2, 140.5, 134.1, 133.3, 130.6, 128.77, 128.75, 128.1, 126.5, 123.1, 41.8, 36.6 ppm.

**HRMS** (ESI): mass found: 305.05882, calculated mass for C<sub>14</sub>H<sub>13</sub>N<sub>2</sub>O<sub>4</sub>S<sup>+</sup>: 305.05905.

**IR** (KBr): 3464, 3090, 2932, 2872, 2663, 2332, 2160, 2079, 1985, 1887, 1811, 1726, 1605, 1533, 1498, 1459, 1347, 1234, 1169, 1124, 1081, 1029, 978, 908, 812, 775, 736, 695, 664  $\text{cm}^{-1}$ .

### 1-((2-Nitrophenyl)sulfonyl)-2-phenylaziridine (**22e**)

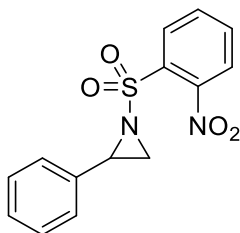

Compound **22e** was prepared according to the general procedure **GP1** and was obtained after column chromatography (*n*-hexane : ethyl acetate 9:1→4:1) as a white oil in 76% yield (40 mg).

Compound **22e** was prepared according to the general procedure **GP2** and was obtained after column chromatography (*n*-hexane : ethyl acetate 9:1→4:1) as a white oil in 79% yield (48 mg).

**$^1\text{H}$  NMR** (600 MHz,  $\text{CDCl}_3$ ):  $\delta$  = 8.86 (s, 1H), 8.59 – 8.42 (m, 1H), 8.38 – 8.23 (m, 1H), 7.79 (t,  $J$  = 8.0 Hz, 1H), 7.36 – 7.29 (m, 3H), 7.26 (d,  $J$  = 7.8 Hz, 2H), 3.95 (dd,  $J$  = 7.0, 4.8 Hz, 1H), 3.14 (d,  $J$  = 7.2 Hz, 1H), 2.54 (d,  $J$  = 4.6 Hz, 1H) ppm.

**$^{13}\text{C}$  NMR** (151 MHz,  $\text{CDCl}_3$ ):  $\delta$  = 148.2, 140.4, 134.1, 133.3, 130.6, 128.77, 128.75, 128.1, 126.5, 123.1, 41.8, 36.6 ppm.

**HRMS** (ESI): mass found: 305.05879, calculated mass for  $\text{C}_{14}\text{H}_{13}\text{N}_2\text{O}_4\text{S}^+$ : 305.05905.

**IR** (KBr): 3548, 3089, 2928, 2872, 2333, 2162, 1972, 1888, 1812, 1727, 1605, 1532, 1498, 1460, 1384, 1347, 1276, 1233, 1168, 1123, 1079, 979, 908, 812, 775, 736, 695, 664  $\text{cm}^{-1}$ .

### 2-Phenyl-1-(*o*-tolylsulfonyl)aziridine (**22f**)

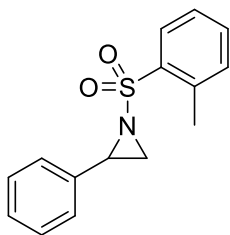

Compound **22f** was prepared according to the general procedure **GP1** and was obtained after column chromatography (*n*-hexane : ethyl acetate 20:1→9:1) as a colorless oil in 84% yield (46 mg).

Compound **22f** was prepared according to the general procedure **GP2** and was obtained after column chromatography (*n*-hexane : ethyl acetate 20:1→9:1) as a colorless oil in 89% yield (49 mg).

**$^1\text{H}$  NMR** (600 MHz,  $\text{CDCl}_3$ ):  $\delta$  = 8.00 (d,  $J$  = 7.9 Hz, 1H), 7.52 (t,  $J$  = 7.5 Hz, 1H), 7.39 – 7.29 (m, 5H), 7.23 (d,  $J$  = 7.7 Hz, 2H), 3.84 (dd,  $J$  = 7.0, 4.6 Hz, 1H), 3.06 (d,  $J$  = 7.2 Hz, 1H), 2.83 (s, 3H), 2.41 (d,  $J$  = 4.4 Hz, 1H) ppm.

**$^{13}\text{C}$  NMR** (151 MHz,  $\text{CDCl}_3$ ):  $\delta$  = 139.1, 136.4, 135.3, 133.60, 132.61, 129.2, 128.6, 128.3, 126.4, 126.0, 40.9, 36.2, 20.6 ppm.

**HRMS** (ESI): mass found: 274.08942, calculated mass for  $C_{15}H_{16}NO_2S^+$ : 274.08963.

**IR** (KBr): 3437, 3064, 3033, 2960, 2933, 2870, 2332, 2161, 2035, 1973, 1699, 1634, 1599, 1496, 1458, 1379, 1319, 1231, 1190, 1160, 1063, 978  $cm^{-1}$ .

### 1-([1,1'-Biphenyl]-4-ylsulfonyl)-2-phenylaziridine (**22g**)

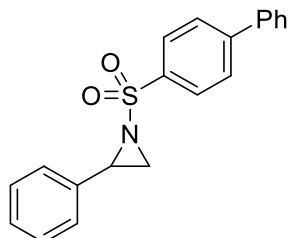

Compound **22g** was prepared according to the general procedure **GP1** and was obtained after column chromatography (*n*-hexane : ethyl acetate 20:1→9:1) as a white solid in 57% yield (38 mg).

Compound **22g** was prepared according to the general procedure **GP2** and was obtained after column chromatography (*n*-hexane : ethyl acetate 20:1→9:1) as a white solid in 65% yield (44 mg).

**$^1H$  NMR** (600 MHz,  $CDCl_3$ ):  $\delta$  = 8.08 (d,  $J$  = 8.1 Hz, 2H), 7.77 (d,  $J$  = 8.1 Hz, 2H), 7.63 (d,  $J$  = 8.0 Hz, 2H), 7.51 (t,  $J$  = 7.4 Hz, 2H), 7.45 (t,  $J$  = 7.3 Hz, 1H), 7.36 – 7.30 (m, 3H), 7.29 – 7.20 (m, 2H), 3.87 (dd,  $J$  = 6.9, 4.7 Hz, 1H), 3.07 (d,  $J$  = 7.2 Hz, 1H), 2.47 (d,  $J$  = 4.5 Hz, 1H) ppm.

**$^{13}C$  NMR** (151 MHz,  $CDCl_3$ ):  $\delta$  = 146.5, 139.2, 136.5, 134.9, 129.0, 128.65, 128.62, 128.44, 128.40, 127.7, 127.3, 126.6, 41.2, 36.0 ppm.

**HRMS** (ESI): mass found: 336.10491, calculated mass for  $C_{20}H_{18}NO_2S^+$ : 336.10528.

**IR** (KBr): 3842, 3451, 3064, 3034, 2925, 2858, 2668, 2326, 2201, 2087, 2028, 1996, 1943, 1729, 1595, 1456, 1385, 1327, 1162, 1126, 1095, 1030, 877, 909, 842, 761, 696  $cm^{-1}$ .

### 1-(Naphthalen-2-ylsulfonyl)-2-phenylaziridine (**22h**)

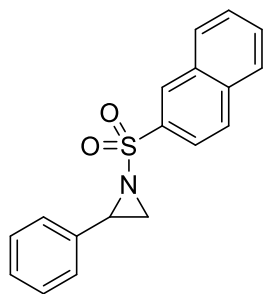

Compound **22h** was prepared according to the general procedure **GP1** and was obtained after column chromatography (*n*-hexane : ethyl acetate 20:1→9:1) as a white solid in 68% yield (42 mg).

Compound **22h** was prepared according to the general procedure **GP2** and was obtained after column chromatography (*n*-hexane : ethyl acetate 20:1→9:1) as a white solid in 74% yield (46 mg).

**$^1H$  NMR** (600 MHz,  $CDCl_3$ ):  $\delta$  = 8.57 (s, 1H), 8.01 (d,  $J$  = 6.8 Hz, 3H), 7.95 (d,  $J$  = 8.2 Hz, 1H), 7.69 (t,  $J$  = 7.5 Hz, 1H), 7.65 (t,  $J$  = 7.5 Hz, 1H), 7.30 (t,  $J$  = 6.9 Hz, 3H), 7.26 (d,  $J$  = 7.8 Hz, 2H), 3.90 (dd,  $J$  = 6.9, 4.6 Hz, 1H), 3.09 (d,  $J$  = 7.2 Hz, 1H), 2.46 (d,  $J$  = 4.4 Hz, 1H) ppm.

<sup>13</sup>C NMR (151 MHz, CDCl<sub>3</sub>): δ = 135.3, 134.9, 134.9, 132.0, 129.4, 129.4, 129.2, 128.6, 128.3, 127.9, 127.6, 126.5, 122.9, 41.2, 36.1 ppm.

**HRMS** (ESI): mass found: 310.08916, calculated mass for C<sub>18</sub>H<sub>16</sub>NO<sub>2</sub>S<sup>+</sup>: 310.08963.

**IR** (KBr): 3525, 3060, 2928, 2861, 2159, 2027, 1939, 1814, 1727, 1591, 1499, 1458, 1384, 1320, 1235, 1189, 1156, 1077, 1029, 976, 906, 860, 816, 750, 698, 661 cm<sup>-1</sup>.

### 2-(*p*-Tolyl)-1-tosylaziridine (**22i**)

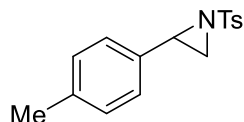

Compound **22i** was prepared according to the general procedure **GP1** and was obtained after column chromatography (*n*-hexane : ethyl acetate 20:1→9:1) as a white solid in 77% yield (44 mg).

Compound **22i** was prepared according to the general procedure **GP2** and was obtained after column chromatography (*n*-hexane : ethyl acetate 20:1→9:1) as a white solid in 84% yield (48 mg).

<sup>1</sup>H NMR (400 MHz, CDCl<sub>3</sub>): δ = 7.84 (d, *J* = 8.3 Hz, 2H), 7.30 (d, *J* = 8.0 Hz, 2H), 7.08 (s, 4H), 3.72 (dd, *J* = 7.2, 4.5 Hz, 1H), 2.95 (d, *J* = 7.2 Hz, 1H), 2.41 (s, 3H), 2.36 (d, *J* = 4.5 Hz, 1H), 2.29 (s, 3H) ppm.

<sup>13</sup>C NMR (101 MHz, CDCl<sub>3</sub>): δ = 144.5, 138.1, 135.0, 131.9, 129.6, 129.2, 127.8, 126.4, 41.0, 35.7, 21.6, 21.1 ppm.

**HRMS** (ESI): mass found: 288.10394, calculated mass for C<sub>14</sub>H<sub>19</sub>NO<sub>2</sub>SNa<sup>+</sup>: 288.10287.

**IR** (KBr): 3484, 2923, 2858, 2305, 2167, 2031, 1910, 1810, 1730, 1596, 1515, 1454, 1381, 1318, 1184, 1157, 1092, 1022, 974, 910, 811, 716, 661 cm<sup>-1</sup>.

### 2-(4-(*tert*-Butyl)phenyl)-1-tosylaziridine (**22j**)

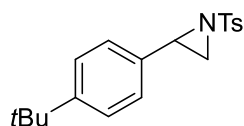

Compound **22j** was prepared according to the general procedure **GP1** and was obtained after column chromatography (*n*-hexane : ethyl acetate 20:1→9:1) as a colorless oil in 76% yield (50 mg).

Compound **22j** was prepared according to the general procedure **GP2** and was obtained after column chromatography (*n*-hexane : ethyl acetate 20:1→9:1) as a colorless oil in 82% yield (54 mg).

<sup>1</sup>H NMR (400 MHz, CDCl<sub>3</sub>): δ = 7.85 (d, *J* = 8.3 Hz, 2H), 7.39 – 7.27 (m, 4H), 7.19 – 7.08 (m, 2H), 3.75 (dd, *J* = 7.2, 4.5 Hz, 1H), 2.95 (d, *J* = 7.2 Hz, 1H), 2.42 (s, 3H), 2.37 (d, *J* = 4.5 Hz, 1H), 1.27 (s, 9H) ppm.

<sup>13</sup>C NMR (101 MHz, CDCl<sub>3</sub>): δ = 151.3, 144.5, 135.0, 131.9, 129.7, 127.9, 126.2, 125.4, 40.9, 35.7, 34.5, 31.2, 21.6 ppm.

**HRMS** (ESI): mass found: 330.15264, calculated mass for C<sub>19</sub>H<sub>24</sub>NO<sub>2</sub>S<sup>+</sup>: 330.15223.

**IR** (KBr): 3450, 2959, 2869, 2162, 2049, 1913, 1726, 1599, 1513, 1460, 1363, 1326, 1270, 1236, 1188, 1160, 1093, 1019, 980, 910, 816, 745, 714, 670 cm<sup>-1</sup>.



### 1-Tosyl-2-(4-(trifluoromethyl)phenyl)aziridine (**22k**)

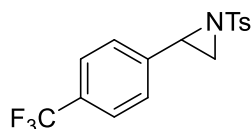

Compound **22k** was prepared according to the general procedure **GP1** and was obtained after column chromatography (*n*-hexane : ethyl acetate 20:1→9:1) as a white solid in 82% yield (56 mg).

Compound **22k** was prepared according to the general procedure **GP2** and was obtained after column chromatography (*n*-hexane : ethyl acetate 20:1→9:1) as a white solid in 88% yield (60 mg).

**<sup>1</sup>H NMR** (600 MHz, CDCl<sub>3</sub>): δ = 7.94 – 7.72 (m, 2H), 7.48 (d, *J* = 8.2 Hz, 2H), 7.27 (d, *J* = 8.4 Hz, 4H), 3.73 (dd, *J* = 7.2, 4.3 Hz, 1H), 2.95 (d, *J* = 7.2 Hz, 1H), 2.37 (s, 3H), 2.29 (d, *J* = 4.3 Hz, 1H) ppm.

**<sup>13</sup>C NMR** (151 MHz, CDCl<sub>3</sub>): δ = 144.9, 139.2, 134.7, 130.5 (q, *J* = 32.6 Hz), 129.8, 127.9, 126.9, 125.5 (q, *J* = 3.6 Hz), 123.9 (q, *J* = 272.0 Hz), 40.1, 36.2, 21.6 ppm.

**<sup>19</sup>F NMR** (565 MHz, CDCl<sub>3</sub>): δ = -62.68 ppm.

**HRMS** (ESI): mass found: 342.07718, calculated mass for C<sub>16</sub>H<sub>15</sub>NF<sub>3</sub>O<sub>2</sub>S<sup>+</sup>: 342.07701.

**IR** (KBr): 2925, 2859, 2164, 2029, 1925, 1807, 1732, 1621, 1594, 1493, 1455, 1423, 1388, 1315, 1239, 1158, 1118, 1064, 1015, 977, 915, 845, 814, 750, 706, 661 cm<sup>-1</sup>.

### 2-(4-Fluorophenyl)-1-tosylaziridine (**22l**)

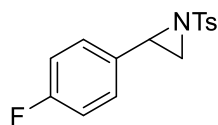

Compound **22l** was prepared according to the general procedure **GP1** and was obtained after column chromatography (*n*-hexane : ethyl acetate 20:1→9:1) as a white solid in 84% yield (49 mg).

Compound **22l** was prepared according to the general procedure **GP2** and was obtained after column chromatography (*n*-hexane : ethyl acetate 20:1→9:1) as a white solid in 92% yield (54 mg).

**<sup>1</sup>H NMR** (400 MHz, CDCl<sub>3</sub>): δ = 7.84 (d, *J* = 8.2 Hz, 2H), 7.32 (d, *J* = 8.0 Hz, 2H), 7.25 – 7.08 (m, 2H), 7.03 – 6.84 (m, 2H), 3.73 (dd, *J* = 7.1, 4.5 Hz, 1H), 2.95 (d, *J* = 7.2 Hz, 1H), 2.42 (s, 3H), 2.33 (d, *J* = 4.4 Hz, 1H) ppm.

**<sup>13</sup>C NMR** (101 MHz, CDCl<sub>3</sub>): δ = 162.6 (d, *J* = 247.3 Hz), 144.7, 134.8, 130.8 (d, *J* = 2.8 Hz), 129.7, 128.2 (d, *J* = 8.4 Hz), 127.9, 115.53 (d, *J* = 21.7 Hz), 40.2, 35.9, 21.6 ppm.

**<sup>19</sup>F NMR** (376 MHz, CDCl<sub>3</sub>): δ = -113.45 – -113.46 ppm.

**HRMS** (ESI): mass found: 292.08053, calculated mass for C<sub>15</sub>H<sub>15</sub>NFO<sub>2</sub>S<sup>+</sup>: 292.08020.

**IR** (KBr): 3068, 2927, 2863, 2176, 2043, 1989, 1897, 1729, 1601, 1512, 1455, 1380, 1324, 1230, 1187, 1158, 1092, 1018, 981, 909, 817, 715, 663 cm<sup>-1</sup>.

## 2-(4-Chlorophenyl)-1-tosylaziridine (**22m**)

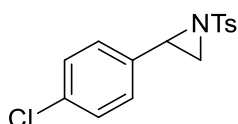

Compound **22m** was prepared according to the general procedure **GP1** and was obtained after column chromatography (*n*-hexane : ethyl acetate 20:1→9:1) as a white solid in 81% yield (50 mg).

Compound **22m** was prepared according to the general procedure **GP2** and was obtained after column chromatography (*n*-hexane : ethyl acetate 20:1→9:1) as a white solid in 88% yield (54 mg).

**<sup>1</sup>H NMR** (400 MHz, CDCl<sub>3</sub>): δ = 7.84 (d, *J* = 8.3 Hz, 2H), 7.31 (d, *J* = 8.0 Hz, 2H), 7.27 – 7.20 (m, 2H), 7.16 – 7.05 (m, 2H), 3.71 (dd, *J* = 7.1, 4.4 Hz, 1H), 2.96 (d, *J* = 7.2 Hz, 1H), 2.42 (s, 3H), 2.32 (d, *J* = 4.4 Hz, 1H) ppm.

**<sup>13</sup>C NMR** (101 MHz, CDCl<sub>3</sub>): δ = 144.7, 134.7, 134.1, 133.6, 129.7, 128.7, 127.9, 127.8, 40.2, 36.0, 21.6 ppm.

**HRMS** (ESI): mass found: 330.03096, calculated mass for C<sub>15</sub>H<sub>14</sub>NClO<sub>2</sub>SNa<sup>+</sup>: 330.03260.

**IR** (KBr): 3462, 2924, 2857, 2302, 2169, 1926, 1730, 1594, 1491, 1453, 1405, 1376, 1319, 1226, 1185, 1157, 1089, 1014, 977, 909, 815, 730, 696, 668 cm<sup>-1</sup>.

## 2-(4-Bromophenyl)-1-tosylaziridine (**22n**)

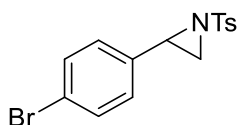

Compound **22n** was prepared according to the general procedure **GP1** and was obtained after column chromatography (*n*-hexane : ethyl acetate 20:1→9:1) as a white solid in 77% yield (54 mg).

Compound **22n** was prepared according to the general procedure **GP2** and was obtained after column chromatography (*n*-hexane : ethyl acetate 20:1→9:1) as a white solid in 85% yield (60 mg).

**<sup>1</sup>H NMR** (400 MHz, CDCl<sub>3</sub>): δ = 7.83 (d, *J* = 8.3 Hz, 2H), 7.46 – 7.36 (m, 2H), 7.32 (d, *J* = 8.0 Hz, 2H), 7.16 – 6.97 (m, 2H), 3.70 (dd, *J* = 7.1, 4.4 Hz, 1H), 2.96 (d, *J* = 7.2 Hz, 1H), 2.42 (s, 3H), 2.32 (d, *J* = 4.4 Hz, 1H) ppm.

**<sup>13</sup>C NMR** (101 MHz, CDCl<sub>3</sub>): δ = 144.7, 134.7, 134.1, 131.6, 129.7, 128.1, 127.9, 122.2, 40.2, 35.9, 21.6 ppm.

**HRMS** (ESI): mass found: 373.98253, calculated mass for C<sub>15</sub>H<sub>14</sub>NBrO<sub>2</sub>SNa<sup>+</sup>: 373.98208.

**IR** (KBr): 3444, 2926, 2859, 2296, 2177, 2019, 1901, 1724, 1591, 1487, 1456, 1405, 1317, 1221, 1185, 1156, 1091, 1071, 1009, 979, 904, 814, 726, 693, 663 cm<sup>-1</sup>.

## 4-(1-Tosylaziridin-2-yl)phenyl acetate (**22o**)

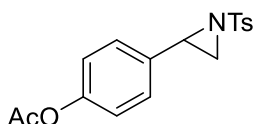

Compound **22o** was prepared according to the general procedure **GP1** and was obtained after column chromatography (*n*-hexane : ethyl acetate 20:1→9:1) as a white solid in 88% yield (58 mg).

Compound **22o** was prepared according to the general procedure **GP2** and was obtained after column chromatography (*n*-hexane : ethyl acetate 20:1→9:1) as a white solid in 89% yield (59 mg).

**<sup>1</sup>H NMR** (600 MHz, CDCl<sub>3</sub>): δ = 7.95 (d, *J* = 8.3 Hz, 2H), 7.86 (d, *J* = 8.2 Hz, 2H), 7.33 (d, *J* = 8.0 Hz, 2H), 7.28 (d, *J* = 8.2 Hz, 2H), 3.89 (s, 3H), 3.79 (dd, *J* = 7.1, 4.4 Hz, 1H), 3.01 (d, *J* = 7.2 Hz, 1H), 2.43 (s, 3H), 2.38 (d, *J* = 4.3 Hz, 1H) ppm.

**<sup>13</sup>C NMR** (151 MHz, CDCl<sub>3</sub>): δ = 166.5, 144.8, 140.1, 134.6, 130.0, 129.8, 129.8, 127.9, 126.5, 52.1, 40.4, 36.2, 21.6 ppm.

**HRMS** (ESI): mass found: 332.09547, calculated mass for C<sub>17</sub>H<sub>18</sub>NO<sub>4</sub>S<sup>+</sup>: 332.09511.

**IR** (KBr): 3449, 2952, 2857, 2730, 2160, 2037, 1934, 1718, 1611, 1507, 1436, 1323, 1278, 1185, 1160, 1103, 1020, 973, 908, 858, 815, 770, 718, 695, 666 cm<sup>-1</sup>.

### 2-(*m*-Tolyl)-1-tosylaziridine (**22p**)

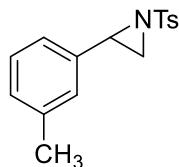

Compound **22p** was prepared according to the general procedure **GP1** and was obtained after column chromatography (*n*-hexane : ethyl acetate 20:1→9:1) as a colorless oil in 75% yield (43 mg).

Compound **22p** was prepared according to the general procedure **GP2** and was obtained after column chromatography (*n*-hexane : ethyl acetate 20:1→9:1) as a colorless oil in 79% yield (46 mg).

**<sup>1</sup>H NMR** (400 MHz, CDCl<sub>3</sub>): δ = 7.85 (d, *J* = 8.3 Hz, 2H), 7.31 (d, *J* = 8.0 Hz, 2H), 7.20 – 7.12 (m, 1H), 7.06 (d, *J* = 7.5 Hz, 1H), 7.00 (d, *J* = 6.1 Hz, 2H), 3.73 (dd, *J* = 7.2, 4.5 Hz, 1H), 2.94 (d, *J* = 7.2 Hz, 1H), 2.42 (s, 3H), 2.36 (d, *J* = 4.5 Hz, 1H), 2.28 (s, 3H) ppm.

**<sup>13</sup>C NMR** (101 MHz, CDCl<sub>3</sub>): δ = 144.5, 138.2, 134.9, 134.9, 129.7, 129.0, 128.4, 127.9, 127.1, 123.6, 41.0, 35.8, 21.6, 21.2 ppm.

**HRMS** (ESI): mass found: 288.10555, calculated mass for C<sub>16</sub>H<sub>18</sub>NO<sub>2</sub>S<sup>+</sup>: 288.10528.

**IR** (KBr): 3259, 3029, 2924, 2864, 2324, 2167, 2087, 1992, 1929, 1728, 1598, 1490, 1455, 1378, 1324, 1247, 1214, 1159, 1091, 1035, 978, 928, 867, 813, 786, 720, 694, 666 cm<sup>-1</sup>.

### 1-Tosyl-2-(3-(trifluoromethyl)phenyl)aziridine (**22q**)

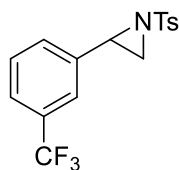

Compound **22q** was prepared according to the general procedure **GP1** and was obtained after column chromatography (*n*-hexane : ethyl acetate 20:1→9:1) as a white solid in 75% yield (51 mg).

Compound **22q** was prepared according to the general procedure **GP2** and was obtained after column chromatography (*n*-hexane : ethyl acetate 20:1→9:1) as a white solid in 82% yield (56 mg).

**<sup>1</sup>H NMR** (600 MHz, CDCl<sub>3</sub>): δ = 7.95 – 7.74 (m, 2H), 7.47 – 7.43 (m, 1H), 7.42 – 7.29 (m, 3H), 7.28 (d, *J* = 8.0 Hz, 2H), 3.73 (dd, *J* = 7.2, 4.4 Hz, 1H), 2.93 (d, *J* = 7.2 Hz, 1H), 2.37 (s, 3H), 2.31 (d, *J* = 4.4 Hz, 1H) ppm.

**<sup>13</sup>C NMR** (151 MHz, CDCl<sub>3</sub>): δ = 145.0, 136.3, 134.6, 131.0 (q, *J* = 32.6 Hz), 130.0, 129.8, 129.1, 128.0, 125.1 (q, *J* = 3.5 Hz), 123.8 (q, *J* = 272.1 Hz), 123.4 (q, *J* = 3.9 Hz), 40.1, 36.1, 21.6 ppm.

**<sup>19</sup>F NMR** (565 MHz, CDCl<sub>3</sub>): δ = -62.78 ppm.

**HRMS** (ESI): mass found: 342.07770, calculated mass for C<sub>16</sub>H<sub>15</sub>NF<sub>3</sub>O<sub>2</sub>S<sup>+</sup>: 342.07701.

**IR** (KBr): 3473, 3068, 2929, 2862, 2163, 1919, 1728, 1597, 1493, 1452, 1381, 1324, 1231, 1159, 1123, 1074, 983, 920, 845, 806, 719, 700, 672 cm<sup>-1</sup>.

### 2-(3-Nitrophenyl)-1-tosylaziridine (**22r**)

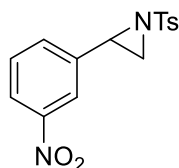

Compound **22r** was prepared according to the general procedure **GP1** and was obtained after column chromatography (*n*-hexane : ethyl acetate 20:1→9:1) as a colorless oil in 47% yield (30 mg).

Compound **22r** was prepared according to the general procedure **GP2** and was obtained after column chromatography (*n*-hexane : ethyl acetate 20:1→9:1) as a colorless oil in 54% yield (32 mg).

**<sup>1</sup>H NMR** (600 MHz, CDCl<sub>3</sub>): δ = 8.10 (d, *J* = 8.1 Hz, 1H), 7.90 (d, *J* = 8.2 Hz, 2H), 7.57 (d, *J* = 4.1 Hz, 2H), 7.48 – 7.43 (m, 1H), 7.37 (d, *J* = 8.1 Hz, 2H), 4.33 (dd, *J* = 7.4, 4.4 Hz, 1H), 3.06 (d, *J* = 7.5 Hz, 1H), 2.46 (s, 3H), 2.26 (d, *J* = 4.3 Hz, 1H) ppm.

**<sup>13</sup>C NMR** (151 MHz, CDCl<sub>3</sub>): δ = 148.0, 145.0, 134.1, 134.0, 131.3, 129.9, 129.4, 129.0, 128.1, 124.7, 39.3, 35.9, 21.7 ppm.

**HRMS** (ESI): mass found: 341.05660, calculated mass for C<sub>15</sub>H<sub>14</sub>N<sub>2</sub>O<sub>4</sub>SNa<sup>+</sup>: 341.05665.

**IR** (KBr): 3290, 3070, 2926, 2890, 2723, 2163, 1727, 1602, 1525, 1451, 1340, 1231, 1160, 1044, 1091, 1044, 982, 915, 857, 815, 791, 722, 697, 670 cm<sup>-1</sup>.

### 2-(2-Fluorophenyl)-1-tosylaziridine (**22s**)

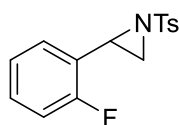

Compound **22s** was prepared according to the general procedure **GP1** and was obtained after column chromatography (*n*-hexane : ethyl acetate 20:1→9:1) as a colorless oil in 77% yield (45 mg).

Compound **22s** was prepared according to the general procedure **GP2** and was obtained after column chromatography (*n*-hexane : ethyl acetate 20:1→9:1) as a colorless oil in 80% yield (47 mg).

**<sup>1</sup>H NMR** (400 MHz, CDCl<sub>3</sub>): δ = 7.86 (d, *J* = 8.3 Hz, 2H), 7.32 (d, *J* = 8.0 Hz, 2H), 7.26 – 7.18 (m, 1H), 7.11 (td, *J* = 7.5, 1.8 Hz, 1H), 7.06 – 6.91 (m, 2H), 3.96 (dd, *J* = 7.2, 4.4 Hz, 1H), 2.99 (d, *J* = 7.2 Hz, 1H), 2.42 (s, 3H), 2.38 (d, *J* = 4.4 Hz, 1H) ppm.

**<sup>13</sup>C NMR** (101 MHz, CDCl<sub>3</sub>): δ = 161.3 (d, *J* = 248.0 Hz), 144.7, 134.6, 129.7 (d, *J* = 7.8 Hz), 129.7, 128.0, 127.4 (d, *J* = 3.2 Hz), 124.2 (d, *J* = 3.7 Hz), 122.4 (d, *J* = 13.4 Hz), 115.2 (d, *J* = 21.0 Hz), 35.57 (d, *J* = 5.4 Hz), 35.09, 21.64 ppm.

**<sup>19</sup>F NMR** (376 MHz, CDCl<sub>3</sub>): δ = -119.41 – -119.50 ppm.

**HRMS** (ESI): mass found: 292.07994, calculated mass for C<sub>15</sub>H<sub>15</sub>NFO<sub>2</sub>S<sup>+</sup>: 292.07916.

**IR** (KBr): 3546, 3064, 2927, 2863, 2170, 2049, 1922, 1806, 1730, 1593, 1495, 1455, 1386, 1326, 1244, 1212, 1159, 1092, 1034, 980, 910, 815, 759, 696, 663 cm<sup>-1</sup>.

### 2-(2,6-Dichlorophenyl)-1-tosylaziridine (**22t**)

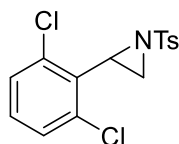

Compound **22t** was prepared according to the general procedure **GP1** and was obtained after column chromatography (*n*-hexane : ethyl acetate 20:1→9:1) as a colorless oil in 69% yield (47 mg).

Compound **22t** was prepared according to the general procedure **GP2** and was obtained after column chromatography (*n*-hexane : ethyl acetate 20:1→9:1) as a colorless oil in 75% yield (52 mg).

**<sup>1</sup>H NMR** (600 MHz, CDCl<sub>3</sub>): δ = 7.84 (d, *J* = 8.3 Hz, 2H), 7.28 (d, *J* = 8.0 Hz, 2H), 7.17 (d, *J* = 7.9 Hz, 2H), 7.10 – 6.99 (m, 1H), 3.81 (dd, *J* = 7.2, 4.6 Hz, 1H), 3.06 (d, *J* = 7.2 Hz, 1H), 2.47 (d, *J* = 4.6 Hz, 1H), 2.39 (s, 3H) ppm.

**<sup>13</sup>C NMR** (151 MHz, CDCl<sub>3</sub>): δ = 144.7, 136.1, 134.9, 130.5, 129.8, 129.6, 128.69, 128.62, 39.6, 34.9, 21.6 ppm.

**HRMS** (ESI): mass found: 342.01153, calculated mass for C<sub>15</sub>H<sub>14</sub>NCl<sub>2</sub>O<sub>2</sub>S<sup>+</sup>: 342.01168.

**IR** (KBr): 3508, 3070, 2926, 2859, 2163, 2044, 1988, 1925, 1728, 1592, 1562, 1493, 1432, 1328, 1238, 1188, 1160, 1093, 971, 912, 852, 784, 712, 665 cm<sup>-1</sup>.

### 1-Tosyl-1,1a,6,6a-tetrahydroindeno[1,2-*b*]azirine (**22u**)

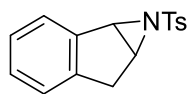

Compound **22u** was prepared according to the general procedure **GP1** and was obtained after column chromatography (*n*-hexane : ethyl acetate 9:1→4:1) as a white solid in 74% yield (42 mg).

Compound **22u** was prepared according to the general procedure **GP2** and was obtained after column chromatography (*n*-hexane : ethyl acetate 9:1→4:1) as a white solid in 83% yield (48 mg).

**<sup>1</sup>H NMR** (600 MHz, CDCl<sub>3</sub>): δ = 8.47 (s, 2H), 8.15 (s, 1H), 7.44 – 7.30 (m, 3H), 7.33 – 7.14 (m, 2H), 4.09 – 3.83 (m, 1H), 3.16 (d, *J* = 7.3 Hz, 1H), 2.59 (d, *J* = 4.6 Hz, 1H) ppm.

**<sup>13</sup>C NMR** (151 MHz, CDCl<sub>3</sub>): δ = 144.4, 143.5, 138.2, 135.4, 129.6, 128.7, 127.7, 126.6, 125.5, 125.0, 50.1, 44.9, 34.6, 21.6 ppm.

**HRMS** (ESI): mass found: 286.08944, calculated mass for C<sub>16</sub>H<sub>16</sub>NO<sub>2</sub>S<sup>+</sup>: 286.08963.

**IR** (KBr): 3460, 3044, 2924, 2858, 2324, 2164, 2043, 1922, 1811, 1730, 1596, 1465, 1381, 1359, 1311, 1237, 1185, 1152, 1088, 1023, 1001, 968, 927, 871, 814, 766, 719, 671 cm<sup>-1</sup>.

### 2-Cyclohexyl-1-tosylaziridine (**23a**)

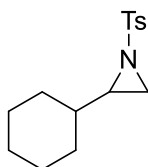

Compound **23a** was prepared according to the general procedure **GP1** and was obtained after column chromatography (*n*-hexane : ethyl acetate 20:1→9:1) as a colorless oil in 40% yield (23 mg).

Compound **23a** was prepared according to the general procedure **GP2** and was obtained after column chromatography (*n*-hexane : ethyl acetate 20:1→9:1) as a colorless oil in 62% yield (35 mg).

**<sup>1</sup>H NMR** (600 MHz, CDCl<sub>3</sub>): δ = 7.88 – 7.75 (m, 2H), 7.33 (d, *J* = 8.1 Hz, 2H), 2.59 (d, *J* = 7.0 Hz, 1H), 2.57 – 2.50 (m, 1H), 2.44 (s, 3H), 2.10 (d, *J* = 4.7 Hz, 1H), 1.76 – 1.67 (m, 1H), 1.66 – 1.58 (m, 3H), 1.53 – 1.46 (m, 1H), 1.22 – 1.03 (m, 4H), 1.03 – 0.97 (m, 1H), 0.95 – 0.86 (m, 1H) ppm.

**<sup>13</sup>C NMR** (151 MHz, CDCl<sub>3</sub>): δ = 144.3, 135.1, 129.5, 128.0, 45.1, 39.3, 32.6, 30.1, 29.6, 25.9, 25.5, 25.3, 21.63 ppm.

**HRMS** (ESI): mass found: 302.11820, calculated mass for C<sub>15</sub>H<sub>21</sub>NNaO<sub>2</sub>S<sup>+</sup>: 302.11852.

**IR** (KBr): 3336, 2925, 2853, 2662, 2164, 1916, 1725, 1598, 1494, 1449, 1404, 1321, 1230, 1157, 1091, 948, 885, 814, 717, 666 cm<sup>-1</sup>.

### 2-Butyl-1-tosylaziridine (**23b**)

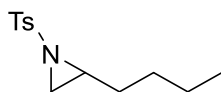

Compound **23b** was prepared according to the general procedure **GP1** and was obtained after column chromatography (*n*-hexane : ethyl acetate 20:1→9:1) as a colorless oil in 47% yield (24 mg).

Compound **23b** was prepared according to the general procedure **GP2** and was obtained after column chromatography (*n*-hexane : ethyl acetate 20:1→9:1) as a colorless oil in 61% yield (31 mg).

**<sup>1</sup>H NMR** (400 MHz, CDCl<sub>3</sub>): δ = 7.81 (d, *J* = 8.2 Hz, 2H), 7.32 (d, *J* = 8.0 Hz, 2H), 2.70 (dq, *J* = 7.3, 4.9 Hz, 1H), 2.61 (d, *J* = 7.0 Hz, 1H), 2.43 (s, 3H), 2.03 (d, *J* = 4.6 Hz, 1H), 1.60 – 1.44 (m, 1H), 1.39 – 1.27 (m, 1H), 1.27 – 1.14 (m, 4H), 0.79 (t, *J* = 7.0 Hz, 3H) ppm.

**<sup>13</sup>C NMR** (101 MHz, CDCl<sub>3</sub>): δ = 144.3, 135.2, 129.5, 127.9, 40.3, 33.7, 30.9, 28.8, 22.0, 21.5, 13.7 ppm.

**HRMS** (ESI): mass found: 276.10249, calculated mass for C<sub>13</sub>H<sub>19</sub>NNaO<sub>2</sub>S<sup>+</sup>: 276.10287.

**IR** (KBr): 2930, 2865, 2327, 2168, 2103, 1993, 1915, 1597, 1457, 1400, 1321, 1230, 1158, 1090, 1036, 923, 863, 814, 773, 711, 661 cm<sup>-1</sup>.

### 2-Hexyl-1-tosylaziridine (**23c**)

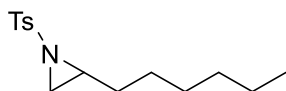

Compound **23c** was prepared according to the general procedure **GP1** and was obtained after column chromatography (*n*-hexane : ethyl acetate 20:1→9:1) as a colorless oil in 41% yield (23 mg).

Compound **23c** was prepared according to the general procedure **GP2** and was obtained after column chromatography (*n*-hexane : ethyl acetate 20:1→9:1) as a colorless oil in 60% yield (34 mg).

**<sup>1</sup>H NMR** (400 MHz, CDCl<sub>3</sub>): δ = 7.81 (d, *J* = 8.3 Hz, 2H), 7.31 (d, *J* = 8.0 Hz, 2H), 2.69 (tt, *J* = 7.3, 4.8 Hz, 1H), 2.62 (d, *J* = 7.0 Hz, 1H), 2.42 (s, 3H), 2.03 (d, *J* = 4.6 Hz, 1H), 1.56 – 1.44 (m, 1H), 1.38 – 1.25 (m, 1H), 1.25 – 1.10 (m, 8H), 0.83 (t, *J* = 7.0 Hz, 3H) ppm.

**<sup>13</sup>C NMR** (101 MHz, CDCl<sub>3</sub>): δ = 144.3, 135.2, 129.5, 127.9, 40.4, 33.7, 31.5, 31.2, 28.6, 26.6, 22.3, 21.5, 13.9 ppm.

**HRMS** (ESI): mass found: 304.13369, calculated mass for C<sub>15</sub>H<sub>23</sub>NNaO<sub>2</sub>S<sup>+</sup>: 304.13417.

**IR** (KBr): 2927, 2858, 2327, 2085, 2000, 1912, 1597, 1457, 1400, 1323, 1231, 1158, 1091, 1017, 930, 865, 814, 777, 712, 662 cm<sup>-1</sup>.

### 2-Dodecyl-1-tosylaziridine (**23d**)

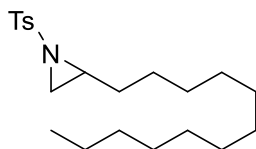

Compound **23d** was prepared according to the general procedure **GP1** and was obtained after column chromatography (*n*-hexane : ethyl acetate 20:1→9:1) as a colorless oil in 43% yield (32 mg).

Compound **23d** was prepared according to the general procedure **GP2** and was obtained after column chromatography (*n*-hexane : ethyl acetate 20:1→9:1) as a colorless oil in 59% yield (43 mg).

**<sup>1</sup>H NMR** (400 MHz, CDCl<sub>3</sub>): δ = 7.80 (d, *J* = 8.2 Hz, 2H), 7.31 (d, *J* = 8.0 Hz, 2H), 2.69 (dq, *J* = 7.3, 4.8 Hz, 1H), 2.61 (d, *J* = 7.0 Hz, 1H), 2.42 (s, 3H), 2.03 (d, *J* = 4.6 Hz, 1H), 1.50 (dt, *J* = 13.3, 5.6 Hz, 1H), 1.38 – 1.08 (m, 21H), 0.86 (t, *J* = 6.8 Hz, 3H) ppm.

**<sup>13</sup>C NMR** (101 MHz, CDCl<sub>3</sub>): δ = 144.3, 135.2, 129.5, 127.9, 40.4, 33.7, 31.8, 31.2, 29.62, 29.60, 29.5, 29.4, 29.38, 29.31, 28.9, 26.7, 22.6, 21.5, 14.0 ppm.

**HRMS** (ESI): mass found: 366.24557, calculated mass for C<sub>21</sub>H<sub>36</sub>NO<sub>2</sub>S<sup>+</sup>: 366.24613.

**IR** (KBr): 3882, 3525, 2923, 2853, 2327, 2191, 2107, 1988, 1912, 1730, 1597, 1495, 1459, 1401, 1325, 1231, 1160, 1092, 1018, 927, 865, 813, 713, 662 cm<sup>-1</sup>.

### 2-(3-Methylbenzyl)-1-tosylaziridine (**23e**)

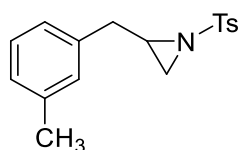

Compound **23e** was prepared according to the general procedure **GP1** and was obtained after column chromatography (*n*-hexane : ethyl acetate 20:1→9:1) as a colorless oil in 53% yield (32 mg).

Compound **23e** was prepared according to the general procedure **GP2** and was obtained after column chromatography (*n*-hexane : ethyl acetate 20:1→9:1) as a colorless oil in 71% yield (43 mg).

**<sup>1</sup>H NMR** (400 MHz, CDCl<sub>3</sub>): δ = 7.66 (d, *J* = 8.3 Hz, 2H), 7.19 (d, *J* = 8.0 Hz, 2H), 7.04 (t, *J* = 7.8 Hz, 1H), 6.95 (d, *J* = 7.6 Hz, 1H), 6.84 (d, *J* = 6.9 Hz, 2H), 3.07 – 2.83 (m, 1H), 2.80 – 2.67 (m, 2H), 2.63 (dd, *J* = 14.4, 7.1 Hz, 1H), 2.40 (s, 3H), 2.22 (s, 3H), 2.15 (d, *J* = 4.5 Hz, 1H) ppm.

**<sup>13</sup>C NMR** (101 MHz, CDCl<sub>3</sub>): δ = 144.1, 137.9, 136.9, 134.8, 129.49, 129.46, 128.3, 127.7, 127.2, 125.6, 41.3, 37.4, 32.8, 21.5, 21.2 ppm.

**HRMS** (ESI): mass found: 324.10260, calculated mass for C<sub>17</sub>H<sub>19</sub>NNaO<sub>2</sub>S<sup>+</sup>: 324.10287.

**IR** (KBr): 3505, 3022, 2921, 2161, 2029, 1917, 1724, 1676, 1599, 1489, 1451, 1391, 1321, 1230, 1157, 1090, 973, 945, 903, 853, 813, 774, 742, 695, 661 cm<sup>-1</sup>.

### 2-Phenethyl-1-tosylaziridine (**23f**)

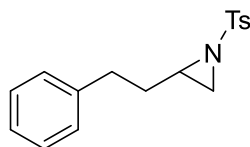

Compound **23f** was prepared according to the general procedure **GP1** and was obtained after column chromatography (*n*-hexane : ethyl acetate 20:1→9:1) as a colorless oil in 43% yield (26 mg).

Compound **23f** was prepared according to the general procedure **GP2** and was obtained after column chromatography (*n*-hexane : ethyl acetate 20:1→9:1) as a colorless oil in 70% yield (42 mg).

**<sup>1</sup>H NMR** (600 MHz, CDCl<sub>3</sub>): δ = 7.88 – 7.73 (m, 2H), 7.34 (d, *J* = 8.1 Hz, 2H), 7.26 (dq, *J* = 5.0, 1.7 Hz, 2H), 7.23 – 7.16 (m, 1H), 7.11 (dd, *J* = 9.1, 2.0 Hz, 2H), 2.81 – 2.73 (m, 1H), 2.67



– 2.53 (m, 3H), 2.44 (s, 3H), 2.05 (d,  $J = 4.6$  Hz, 1H), 1.92 – 1.83 (m, 1H), 1.73 – 1.63 (m, 1H)ppm.

$^{13}\text{C NMR}$  (151 MHz,  $\text{CDCl}_3$ ):  $\delta = 144.5, 140.6, 135.0, 129.6, 128.4, 128.3, 128.0, 126.1, 39.7, 33.8, 33.1, 32.9, 21.6$  ppm.

**HRMS** (ESI): mass found: 324.10257, calculated mass for  $\text{C}_{17}\text{H}_{19}\text{NNaO}_2\text{S}^+$ : 324.10287.

**IR** (KBr): 3545, 3061, 3028, 2926, 2860, 2167, 2024, 1887, 1811, 1725, 1598, 1495, 1452, 1400, 1320, 1231, 1157, 1091, 1021, 926, 872, 814, 748, 697, 662  $\text{cm}^{-1}$ .

### 6-Tosyl-6-azabicyclo[3.1.0]hexane (23g)

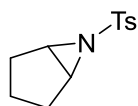

Compound **23g** was prepared according to the general procedure **GP1** and was obtained after column chromatography (*n*-hexane : ethyl acetate 20:1→9:1) as a colorless oil in 68% yield (32 mg).

Compound **23g** was prepared according to the general procedure **GP2** and was obtained after column chromatography (*n*-hexane : ethyl acetate 20:1→9:1) as a colorless oil in 85% yield (41 mg).

$^1\text{H NMR}$  (400 MHz,  $\text{CDCl}_3$ ):  $\delta = 7.78$  (d,  $J = 8.2$  Hz, 2H), 7.29 (d,  $J = 8.0$  Hz, 2H), 3.30 (s, 2H), 2.41 (s, 3H), 1.91 (dd,  $J = 13.3, 7.9$  Hz, 2H), 1.75 – 1.46 (m, 3H), 1.45 – 1.23 (m, 1H) ppm.

$^{13}\text{C NMR}$  (101 MHz,  $\text{CDCl}_3$ ):  $\delta = 144.0, 136.0, 129.5, 127.5, 46.6, 26.9, 21.5, 19.4$  ppm.

**HRMS** (ESI): mass found: 260.07144, calculated mass for  $\text{C}_{12}\text{H}_{15}\text{NNaO}_2\text{S}^+$ : 260.07157.

**IR** (KBr): 35149, 3048, 2959, 2859, 2162, 2028, 1920, 1598, 1494, 1444, 1402, 1366, 1316, 1191, 1154, 1092, 1012, 973, 870, 814, 720, 670  $\text{cm}^{-1}$ .

### Methyl (1R,3R,6S)-7-tosyl-7-azabicyclo[4.1.0]heptane-3-carboxylate (23h)

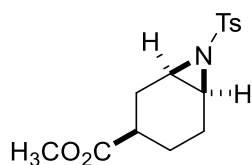

Compound **23h** was prepared according to the general procedure **GP1** and was obtained after column chromatography (*n*-hexane : ethyl acetate 20:1→9:1) as a colorless oil in 58% yield (36 mg).

Compound **23h** was prepared according to the general procedure **GP2** and was obtained after column chromatography (*n*-hexane : ethyl acetate 20:1→9:1) as a colorless oil in 73% yield (45 mg).

$^1\text{H NMR}$  (400 MHz,  $\text{CDCl}_3$ ):  $\delta = 7.77$  (d,  $J = 8.3$  Hz, 2H), 7.30 (d,  $J = 8.0$  Hz, 2H), 3.61 (s, 3H), 3.04 (ddd,  $J = 6.9, 3.9, 1.3$  Hz, 1H), 2.96 (t,  $J = 6.2$  Hz, 1H), 2.49 – 2.43 (m, 1H), 2.41 (s, 3H), 2.07 (dd,  $J = 14.7, 4.9$  Hz, 1H), 2.01 – 1.81 (m, 2H), 1.79 – 1.67 (m, 2H), 1.43 – 1.27 (m, 1H) ppm.

$^{13}\text{C NMR}$  (101 MHz,  $\text{CDCl}_3$ ):  $\delta = 175.2, 144.2, 135.4, 129.6, 127.6, 51.7, 39.8, 38.7, 35.8, 25.4, 22.9, 21.5, 21.3$  ppm.

**HRMS** (ESI): mass found: 332.09306, calculated mass for  $\text{C}_{15}\text{H}_{19}\text{NNaO}_4\text{S}^+$ : 332.09270.

**IR** (KBr): 3541, 2950, 2165, 1976, 1919, 1730, 1597, 1495, 1439, 1403, 1316, 1237, 1155, 1090, 1058, 1016, 977, 919, 888, 814, 724, 668  $\text{cm}^{-1}$ .

**(2Z,4Z,6Z)-9-Tosyl-9-azabicyclo[6.1.0]nona-2,4,6-triene (23i)**

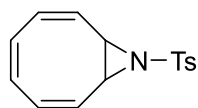

Compound **23i** was prepared according to the general procedure **GP1** and was obtained after column chromatography (*n*-hexane : ethyl acetate 20:1→9:1) as a colorless oil in 20% yield (11 mg).

Compound **23i** was prepared according to the general procedure **GP2** and was obtained after column chromatography (*n*-hexane : ethyl acetate 20:1→9:1) as a colorless oil in 25% yield (14 mg).

**<sup>1</sup>H NMR** (600 MHz,  $\text{CDCl}_3$ ):  $\delta$  = 8.14 – 7.71 (m, 2H), 7.35 (d,  $J$  = 8.1 Hz, 2H), 5.99 (dd,  $J$  = 12.4, 1.0 Hz, 2H), 5.93 – 5.86 (m, 2H), 5.82 (d,  $J$  = 11.6 Hz, 2H), 3.41 (s, 2H), 2.46 (s, 3H) ppm.

**<sup>13</sup>C NMR** (151 MHz,  $\text{CDCl}_3$ ):  $\delta$  = 144.5, 135.1, 129.5, 129.5, 127.8, 125.4, 124.2, 43.9, 21.6 ppm.

**HRMS** (ESI): mass found: 274.08943, calculated mass for  $\text{C}_{15}\text{H}_{16}\text{NO}_2\text{S}^+$ : 274.08963.

**IR** (KBr): 3474, 2923, 2853, 2585, 2241, 2168, 1978, 1930, 1688, 1595, 1493, 1425, 1383, 1318, 1251, 1153, 1088, 1001, 900, 863, 811, 788, 724, 693, 668  $\text{cm}^{-1}$ .

## DFT Calculations

### Computational Details

All calculations were performed using the Gaussian 16, Revision C.01 package.<sup>4</sup> All structures were optimized at the (U)M06-2X level<sup>5</sup> of theory in combination with D3 dispersion corrections,<sup>6</sup> in which all atoms were described with the def2-SVP basis set,<sup>7</sup> Analytical frequency calculations were carried out at the same level of theory in order to confirm each stationary point as either an intermediate (no imaginary frequencies) or a transition state (only one imaginary frequency). Key transition-state structures were confirmed to connect corresponding reactants and products by intrinsic reaction coordinate (IRC) calculations.<sup>8</sup> The electronic energy was then refined using def2-TZVP basis set<sup>7</sup> at the (U)M06-2X level on the optimized geometries in combination with D3 dispersion corrections.<sup>5</sup> Solvation energies in dichloromethane ( $\epsilon = 8.93$ ) and acetonitrile ( $\epsilon = 35.688$ ) were evaluated by IEFPCM calculations with radii and non-electrostatic terms for SMD solvation model<sup>9</sup> based on the optimized structures. The given Gibbs free energies in dichloromethane and acetonitrile were calculated in Table S1 according to the formula:  $G_{\text{sol}} = \text{TCG} + E_{\text{sol}} + 1.89 \text{ kcal mol}^{-1}$ . Time-dependent (TD)-DFT calculations were carried out on the optimized structures of the PhINTs to obtain the absorption wavelength. The CYLview software was employed to show the 3D structures of the studied species.<sup>10</sup>

### Calculation of Single Electron Transfer Steps by Marcus-Hush Theory

To get more details of the singlet electron transfer (SET) process, we estimated the free energy barrier of SET process using the Marcus-Hush theory,<sup>11</sup> which can be calculated according to the following formula:

$$\Delta G_{\text{MH}}^{\ddagger} = \frac{(\Delta G_{\text{r}} + \lambda)^2}{4\lambda}$$

Where  $\Delta G_{\text{r}}$  is the Gibbs free energy change of the SET step,  $\lambda$  is the reorganization energy including inner sphere energy and outer sphere energy. However, the outer sphere energy is often much larger than the inner sphere contribution. Hence, the outer sphere reorganization energy ( $\lambda_{\text{outer}}$ ) can be regarded as the total reorganization energy, which can be calculated according to the following formula:

$$\lambda = \lambda_{\text{outer}} = 332 \left( \frac{1}{2r_1} + \frac{1}{2r_2} - \frac{1}{R} \right) \left( \frac{1}{\epsilon_{\text{opt}}} - \frac{1}{\epsilon_{\text{s}}} \right)$$

Where  $r_1$  and  $r_2$  are the radii of electron donor and acceptor,  $R$  is the sum of  $r_1$  and  $r_2$ ,  $\epsilon_{\text{opt}}$  and  $\epsilon_{\text{s}}$  is the high frequency (optical) dielectric constant and static dielectric constant of solvent respectively (for DCM,  $\epsilon_{\text{opt}} = 2.03$ ,  $\epsilon_{\text{s}} = 8.93$ ).

**Supplementary Table 4.** Calculated free energy barriers ( $\Delta G_{\text{MH}}^\ddagger$ , kcal mol<sup>-1</sup>) of single electron transfer steps.

|                      | $r_1$ (Å) | $r_2$ (Å) | $R$ (Å) | $\lambda$ | $\Delta G_r$ | $\Delta G_{\text{MH}}^\ddagger$ |
|----------------------|-----------|-----------|---------|-----------|--------------|---------------------------------|
| SET1 <sub>DCM</sub>  | 5.40      | 7.15      | 12.55   | 10.47     | -2.88        | 1.38                            |
| SET2 <sub>DCM</sub>  | 6.08      | 7.14      | 13.22   | 9.68      | -38.11       | 20.51                           |
| SET3 <sub>DCM</sub>  | 5.40      | 7.14      | 12.54   | 10.47     | -30.15       | 9.25                            |
| SET1 <sub>MeCN</sub> | 5.40      | 7.15      | 12.55   | 14.45     | -17.68       | 0.18                            |
| SET2 <sub>MeCN</sub> | 6.08      | 7.14      | 13.22   | 13.37     | -23.00       | 1.73                            |
| SET3 <sub>MeCN</sub> | 5.40      | 7.14      | 12.54   | 14.46     | -14.45       | 0.00                            |

### Natural Bond Orbital (NBO) Analysis and Orbital Analysis

Further understanding of the structural and electronic properties of triplet nitrene and nitrene radical anion, we then performed natural bond orbital (NBO) analysis and orbital analysis at SMD(DCM)-M06-2X-D3/def2-TZVP level. For both intermediates, the highest spin population is found on the nitrogen atom. And further calculations show nitrene radical anion **INT2** possesses a higher electron density compared to triplet nitrene **INT1<sub>T</sub>**, which in turn leads to higher nucleophilicity of **INT2**.

Further SOMO orbital analysis and Mayer bond order analysis using Multiwfn program<sup>12</sup> show a  $\pi$ -bonding between S and N atoms in nitrene radical anion **INT2**.

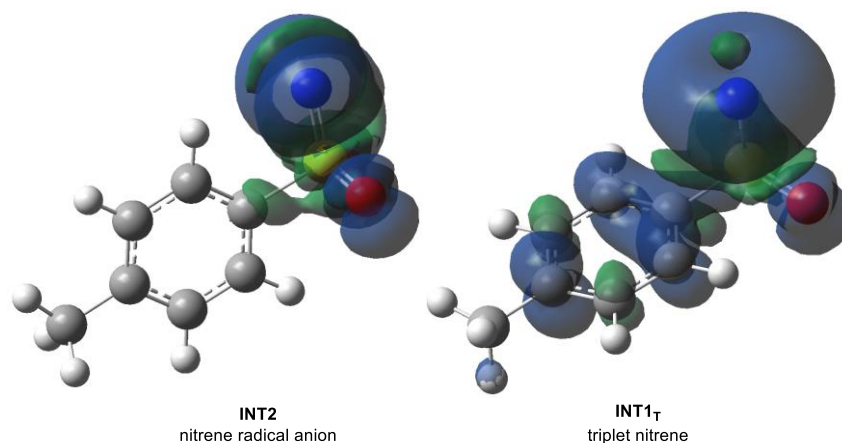

**Supplementary Figure 4.** Computed spin density plots of nitrene radical anion **INT2** and triplet nitrene **INT1<sub>T</sub>**.

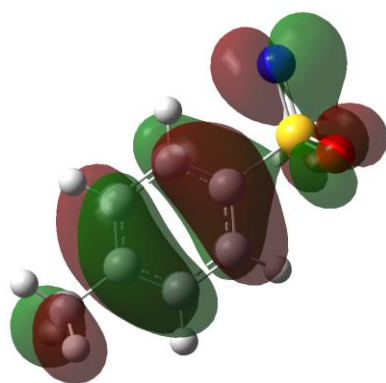

SOMO of INT2  
Mayer bond order of S N bond: 1.56

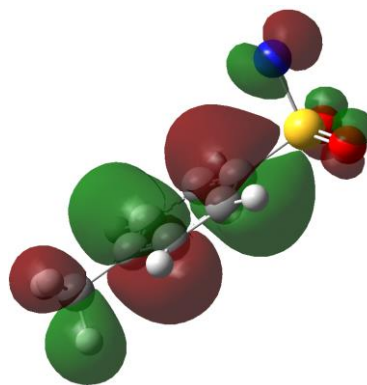

SOMO of INT1<sub>T</sub>  
Mayer bond order of S N bond: 1.02

**Supplementary Figure 5.** SOMO orbitals analysis and Mayer bond order analysis of INT2 and INT1<sub>T</sub>.

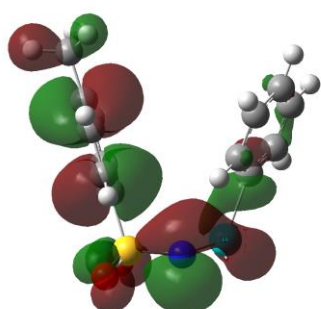

HOMO, left side

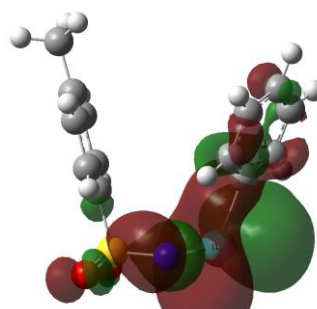

LUMO, left side

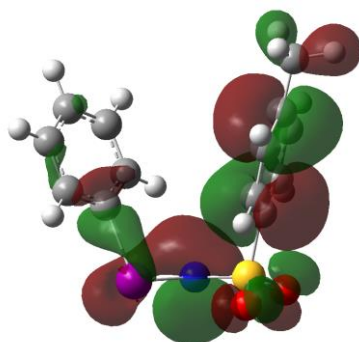

HOMO, right side

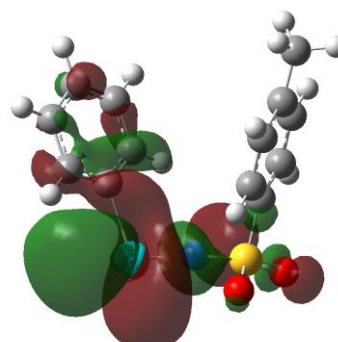

LUMO, right side

**Supplementary Figure 6.** HOMO (orbital #77) and LUMO (orbital #78) of 1a.

Summary of Natural Population Analysis:

| Atom      | No | Natural Charge | Natural Population |          |         |          |
|-----------|----|----------------|--------------------|----------|---------|----------|
|           |    |                | Core               | Valence  | Rydberg | Total    |
| S         | 1  | 2.20567        | 9.99867            | 3.55646  | 0.23921 | 13.79433 |
| O         | 2  | -1.01224       | 1.99984            | 6.98427  | 0.02814 | 9.01224  |
| O         | 3  | -1.00806       | 1.99984            | 6.98005  | 0.02817 | 9.00806  |
| C         | 4  | -0.32920       | 1.99878            | 4.29631  | 0.03411 | 6.32920  |
| C         | 5  | -0.02838       | 1.99917            | 4.00962  | 0.01958 | 6.02838  |
| C         | 6  | -0.20952       | 1.99911            | 4.19017  | 0.02024 | 6.20952  |
| C         | 7  | -0.21995       | 1.99910            | 4.20046  | 0.02039 | 6.21995  |
| C         | 8  | -0.22724       | 1.99913            | 4.20919  | 0.01892 | 6.22724  |
| C         | 9  | -0.22332       | 1.99913            | 4.20579  | 0.01839 | 6.22332  |
| H         | 10 | 0.23447        | 0.00000            | 0.76373  | 0.00180 | 0.76553  |
| H         | 11 | 0.24153        | 0.00000            | 0.75668  | 0.00179 | 0.75847  |
| H         | 12 | 0.22278        | 0.00000            | 0.77558  | 0.00163 | 0.77722  |
| H         | 13 | 0.22301        | 0.00000            | 0.77537  | 0.00162 | 0.77699  |
| C         | 14 | -0.63326       | 1.99945            | 4.62200  | 0.01182 | 6.63326  |
| H         | 15 | 0.21971        | 0.00000            | 0.77875  | 0.00154 | 0.78029  |
| H         | 16 | 0.22467        | 0.00000            | 0.77359  | 0.00174 | 0.77533  |
| H         | 17 | 0.22464        | 0.00000            | 0.77364  | 0.00172 | 0.77536  |
| N         | 18 | -0.90530       | 1.99977            | 5.87453  | 0.03100 | 7.90530  |
| * Total * |    | -1.00000       | 29.99201           | 58.52619 | 0.48180 | 89.00000 |

**Supplementary Figure 7. Natural bond orbital (NBO) analysis of nitrene radical anion INT2.**

Summary of Natural Population Analysis:

| Atom      | No | Natural Charge | Natural Population |          |         |          |
|-----------|----|----------------|--------------------|----------|---------|----------|
|           |    |                | Core               | Valence  | Rydberg | Total    |
| S         | 1  | 2.16138        | 9.99854            | 3.61520  | 0.22489 | 13.83862 |
| O         | 2  | -0.92720       | 1.99983            | 6.89300  | 0.03437 | 8.92720  |
| O         | 3  | -0.92716       | 1.99983            | 6.89296  | 0.03437 | 8.92716  |
| C         | 4  | -0.39735       | 1.99882            | 4.36897  | 0.02956 | 6.39735  |
| C         | 5  | 0.03294        | 1.99919            | 3.94890  | 0.01897 | 5.96706  |
| C         | 6  | -0.16519       | 1.99911            | 4.14655  | 0.01954 | 6.16519  |
| C         | 7  | -0.16744       | 1.99911            | 4.14878  | 0.01955 | 6.16744  |
| C         | 8  | -0.21359       | 1.99914            | 4.19620  | 0.01825 | 6.21359  |
| C         | 9  | -0.21659       | 1.99914            | 4.19890  | 0.01855 | 6.21659  |
| H         | 10 | 0.25558        | 0.00000            | 0.74285  | 0.00156 | 0.74442  |
| H         | 11 | 0.25545        | 0.00000            | 0.74298  | 0.00156 | 0.74455  |
| H         | 12 | 0.23857        | 0.00000            | 0.75988  | 0.00156 | 0.76143  |
| H         | 13 | 0.23879        | 0.00000            | 0.75965  | 0.00156 | 0.76121  |
| C         | 14 | -0.64084       | 1.99944            | 4.62919  | 0.01221 | 6.64084  |
| H         | 15 | 0.23831        | 0.00000            | 0.75997  | 0.00172 | 0.76169  |
| H         | 16 | 0.22780        | 0.00000            | 0.77069  | 0.00151 | 0.77220  |
| H         | 17 | 0.23301        | 0.00000            | 0.76539  | 0.00160 | 0.76699  |
| N         | 18 | -0.22646       | 1.99990            | 5.20571  | 0.02084 | 7.22646  |
| * Total * |    | 0.00000        | 29.99203           | 57.54578 | 0.46219 | 88.00000 |

**Supplementary Figure 8. Natural bond orbital (NBO) analysis of triplet nitrene INT1T.**

Based on the above optimized structure of **1a**, DFT-TD was performed at SMD(DCM)-M06-2X-D3/def2-TZVP level.

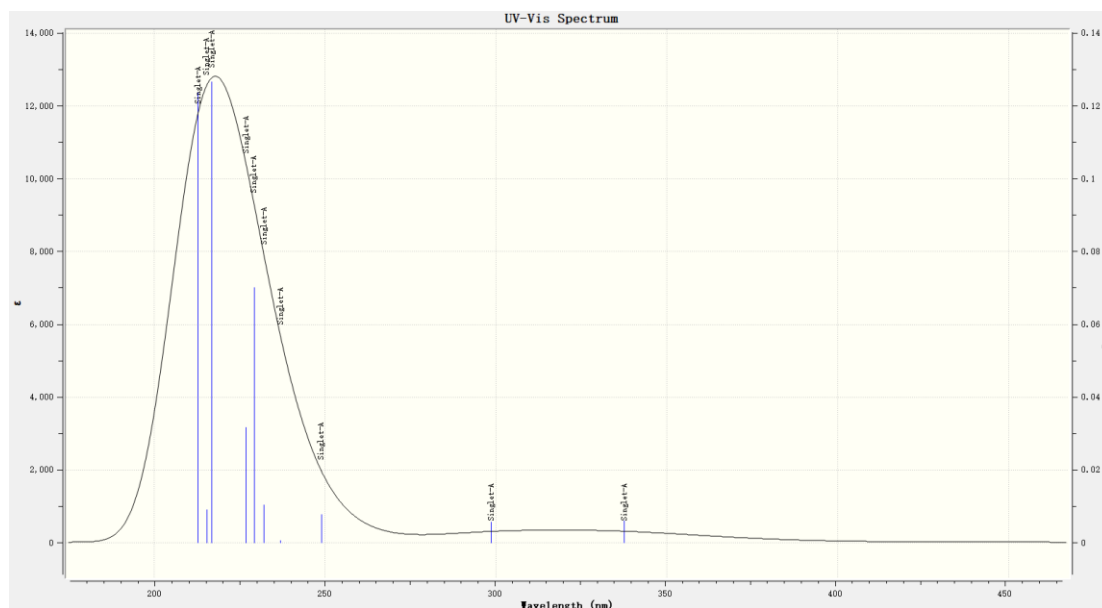

**Supplementary Figure 9.** Calculated UV-Vis spectrum of **1a**.

Excitation energies and oscillator strengths:

Excited State 1: Singlet-A 3.6721 eV **337.64 nm** f=0.0060 <math>\langle S^{\*2} \rangle = 0.000</math>

73 -> 78 0.39940  
 73 -> 82 -0.10352  
 76 -> 78 0.24148  
 77 -> 78 0.44170

Excited State 2: Singlet-A 4.1509 eV **298.69 nm** f=0.0057 <math>\langle S^{\*2} \rangle = 0.000</math>

70 -> 78 0.12250  
 72 -> 78 0.25132  
 75 -> 78 -0.15361  
 76 -> 78 0.54218  
 77 -> 78 -0.24286

Excited State 3: Singlet-A 4.9804 eV **248.94 nm** f=0.0078 <math>\langle S^{\*2} \rangle = 0.000</math>

72 -> 78 0.25363  
 76 -> 79 0.49253  
 76 -> 82 -0.27028  
 77 -> 79 -0.17120

Excited State 4: Singlet-A 5.2315 eV **237.00 nm** f=0.0005 <math>\langle S^{\*2} \rangle = 0.000</math>

74 -> 80 0.12266  
 75 -> 78 -0.13612  
 75 -> 79 0.12337  
 75 -> 80 0.31266  
 77 -> 79 0.27284  
 77 -> 80 -0.25422

|               |          |           |           |                  |                       |
|---------------|----------|-----------|-----------|------------------|-----------------------|
|               | 77 -> 81 | -0.11535  |           |                  |                       |
|               | 77 -> 82 | 0.20288   |           |                  |                       |
|               | 77 -> 83 | -0.25140  |           |                  |                       |
| Excited State | 5:       | Singlet-A | 5.3391 eV | <b>232.22 nm</b> | f=0.0104 <S**2>=0.000 |
|               | 72 -> 78 | 0.25191   |           |                  |                       |
|               | 74 -> 78 | 0.17213   |           |                  |                       |
|               | 74 -> 80 | -0.10496  |           |                  |                       |
|               | 74 -> 81 | 0.19798   |           |                  |                       |
|               | 74 -> 82 | 0.10531   |           |                  |                       |
|               | 75 -> 78 | -0.15263  |           |                  |                       |
|               | 75 -> 79 | -0.12245  |           |                  |                       |
|               | 75 -> 81 | -0.11857  |           |                  |                       |
|               | 75 -> 82 | -0.11446  |           |                  |                       |
|               | 76 -> 78 | -0.11736  |           |                  |                       |
|               | 76 -> 79 | -0.20155  |           |                  |                       |
|               | 76 -> 81 | 0.23660   |           |                  |                       |
|               | 76 -> 83 | -0.12094  |           |                  |                       |
|               | 77 -> 83 | 0.20932   |           |                  |                       |
| Excited State | 6:       | Singlet-A | 5.4069 eV | <b>229.31 nm</b> | f=0.0701 <S**2>=0.000 |
|               | 72 -> 78 | -0.10015  |           |                  |                       |
|               | 73 -> 79 | 0.16873   |           |                  |                       |
|               | 73 -> 82 | -0.10762  |           |                  |                       |
|               | 76 -> 79 | 0.18136   |           |                  |                       |
|               | 77 -> 78 | -0.26881  |           |                  |                       |
|               | 77 -> 79 | 0.39305   |           |                  |                       |
|               | 77 -> 80 | 0.35375   |           |                  |                       |
| Excited State | 7:       | Singlet-A | 5.4627 eV | <b>226.97 nm</b> | f=0.0316 <S**2>=0.000 |
|               | 71 -> 78 | 0.14210   |           |                  |                       |
|               | 72 -> 78 | 0.38054   |           |                  |                       |
|               | 74 -> 78 | -0.21657  |           |                  |                       |
|               | 75 -> 78 | 0.12948   |           |                  |                       |
|               | 76 -> 78 | -0.18103  |           |                  |                       |
|               | 76 -> 79 | -0.15050  |           |                  |                       |
|               | 76 -> 81 | -0.18524  |           |                  |                       |
|               | 77 -> 79 | 0.16933   |           |                  |                       |
|               | 77 -> 81 | 0.15221   |           |                  |                       |
|               | 77 -> 82 | -0.14929  |           |                  |                       |
| Excited State | 8:       | Singlet-A | 5.7155 eV | <b>216.93 nm</b> | f=0.1267 <S**2>=0.000 |
|               | 72 -> 78 | 0.12428   |           |                  |                       |
|               | 73 -> 78 | -0.24056  |           |                  |                       |
|               | 74 -> 79 | -0.14961  |           |                  |                       |
|               | 75 -> 78 | -0.26646  |           |                  |                       |



|               |          |           |           |                  |                       |
|---------------|----------|-----------|-----------|------------------|-----------------------|
|               | 77 -> 78 | 0.26077   |           |                  |                       |
|               | 77 -> 80 | 0.38296   |           |                  |                       |
|               | 77 -> 82 | 0.18039   |           |                  |                       |
| Excited State | 9:       | Singlet-A | 5.7548 eV | <b>215.45 nm</b> | f=0.0090 <S**2>=0.000 |
|               | 73 -> 78 | -0.21927  |           |                  |                       |
|               | 74 -> 78 | -0.32690  |           |                  |                       |
|               | 74 -> 79 | 0.21980   |           |                  |                       |
|               | 74 -> 81 | 0.10304   |           |                  |                       |
|               | 75 -> 78 | 0.33535   |           |                  |                       |
|               | 75 -> 79 | -0.17903  |           |                  |                       |
|               | 76 -> 78 | 0.10597   |           |                  |                       |
|               | 77 -> 78 | 0.20777   |           |                  |                       |
|               | 77 -> 79 | 0.15100   |           |                  |                       |
|               | 77 -> 82 | 0.12092   |           |                  |                       |
| Excited State | 10:      | Singlet-A | 5.8242 eV | <b>212.88 nm</b> | f=0.1236 <S**2>=0.000 |
|               | 72 -> 78 | 0.10841   |           |                  |                       |
|               | 73 -> 78 | 0.30945   |           |                  |                       |
|               | 73 -> 79 | -0.15286  |           |                  |                       |
|               | 75 -> 78 | 0.10117   |           |                  |                       |
|               | 75 -> 80 | 0.17007   |           |                  |                       |
|               | 76 -> 79 | -0.17587  |           |                  |                       |
|               | 76 -> 80 | 0.18061   |           |                  |                       |
|               | 77 -> 78 | -0.16277  |           |                  |                       |
|               | 77 -> 79 | -0.23083  |           |                  |                       |
|               | 77 -> 80 | 0.25379   |           |                  |                       |
|               | 77 -> 81 | -0.14498  |           |                  |                       |
|               | 77 -> 82 | 0.17127   |           |                  |                       |

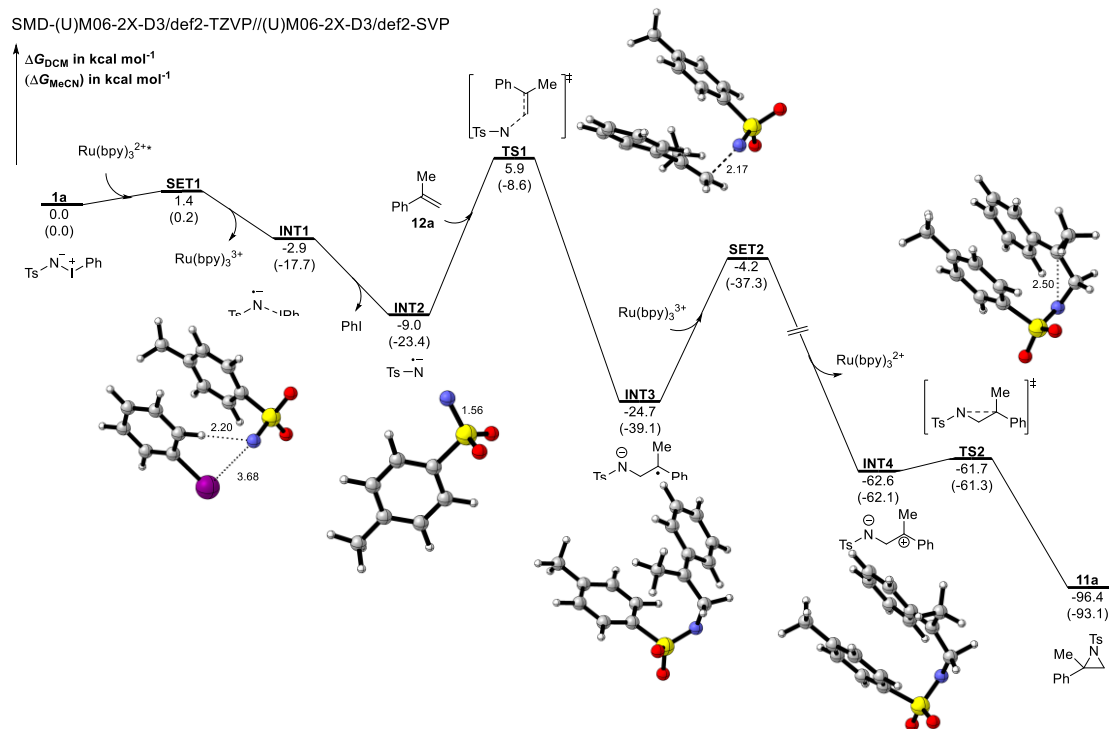

**Supplementary Figure 10.** Relative free-energy profile of photocatalytic reaction of iminoiodinane **1a** with **12a**.

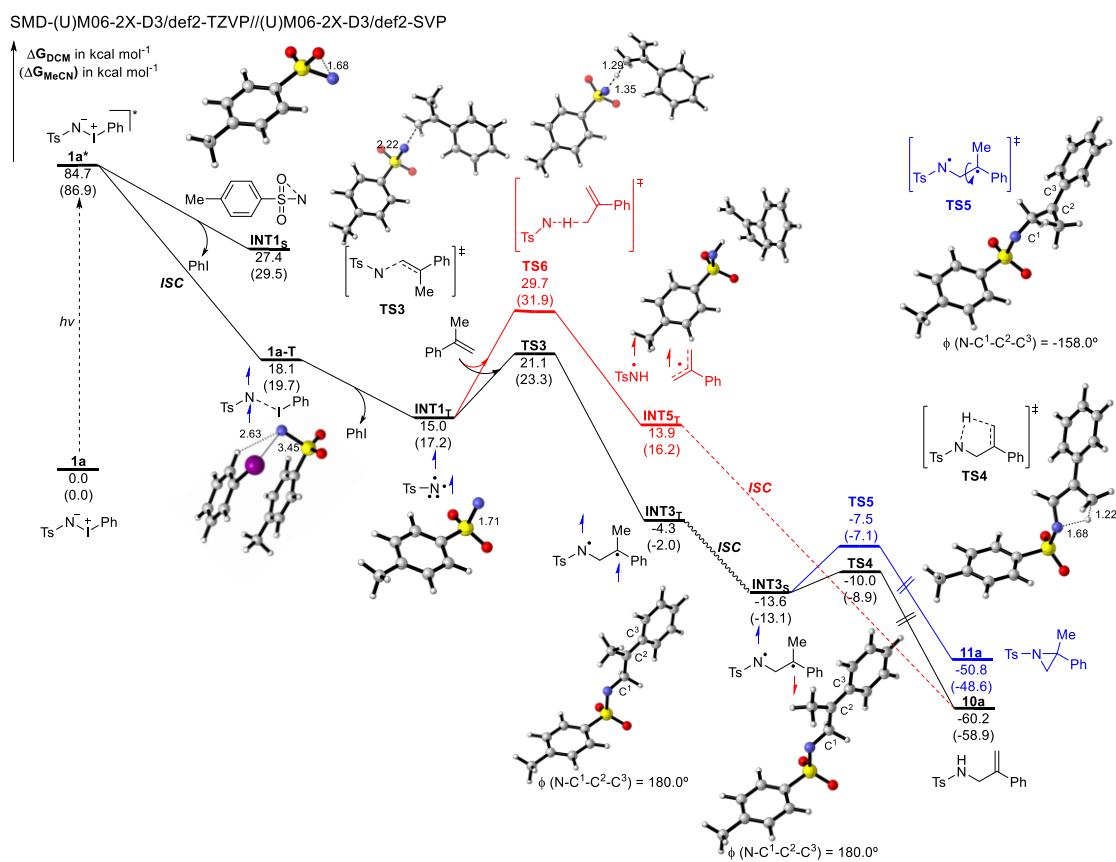

**Supplementary Figure 11.** Relative free-energy profile of photochemical reaction of iminoiodinane **1a** with **12a**.

SMD-(U)M06-2X-D3/def2-TZVP//((U)M06-2X-D3/def2-SVP

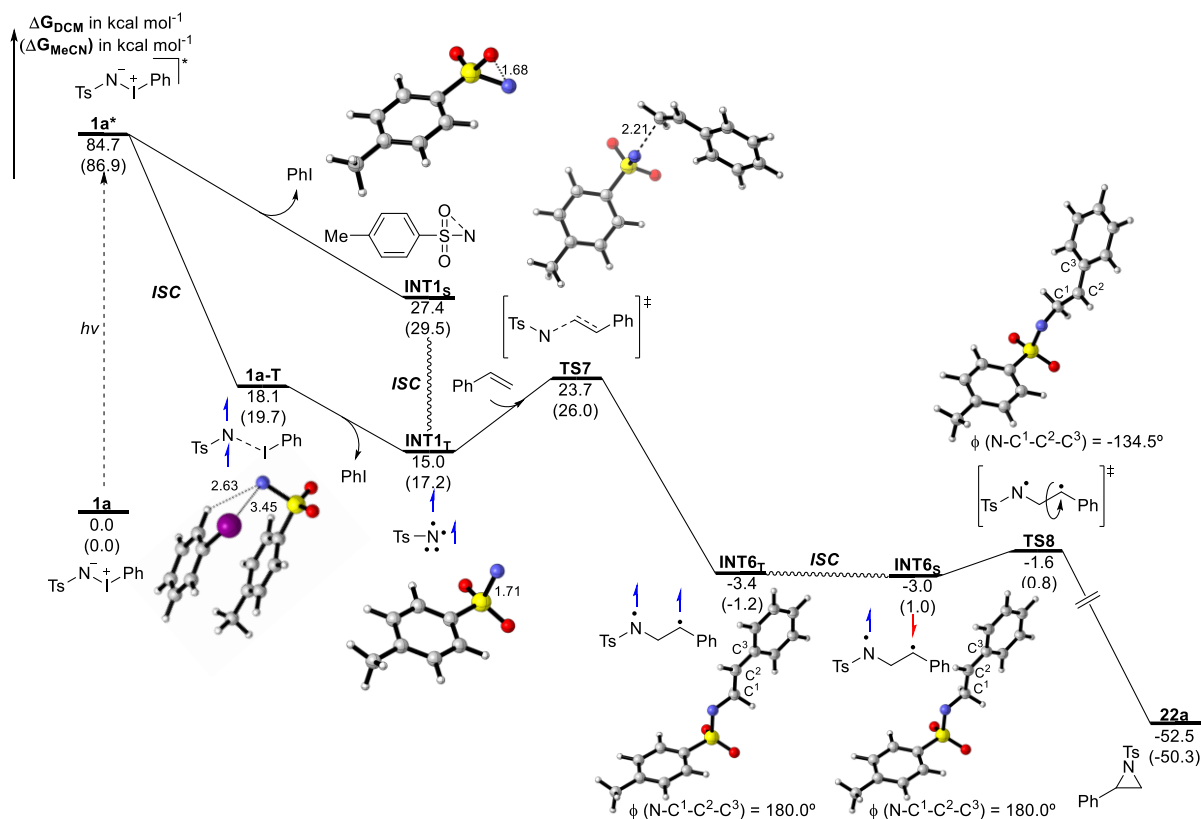

**Supplementary Figure 12.** Relative free-energy profile of photochemical reaction of iminoiodanine **1a** with styrene.

SMD-(U)M06-2X-D3/def2-TZVP//((U)M06-2X-D3/def2-SVP

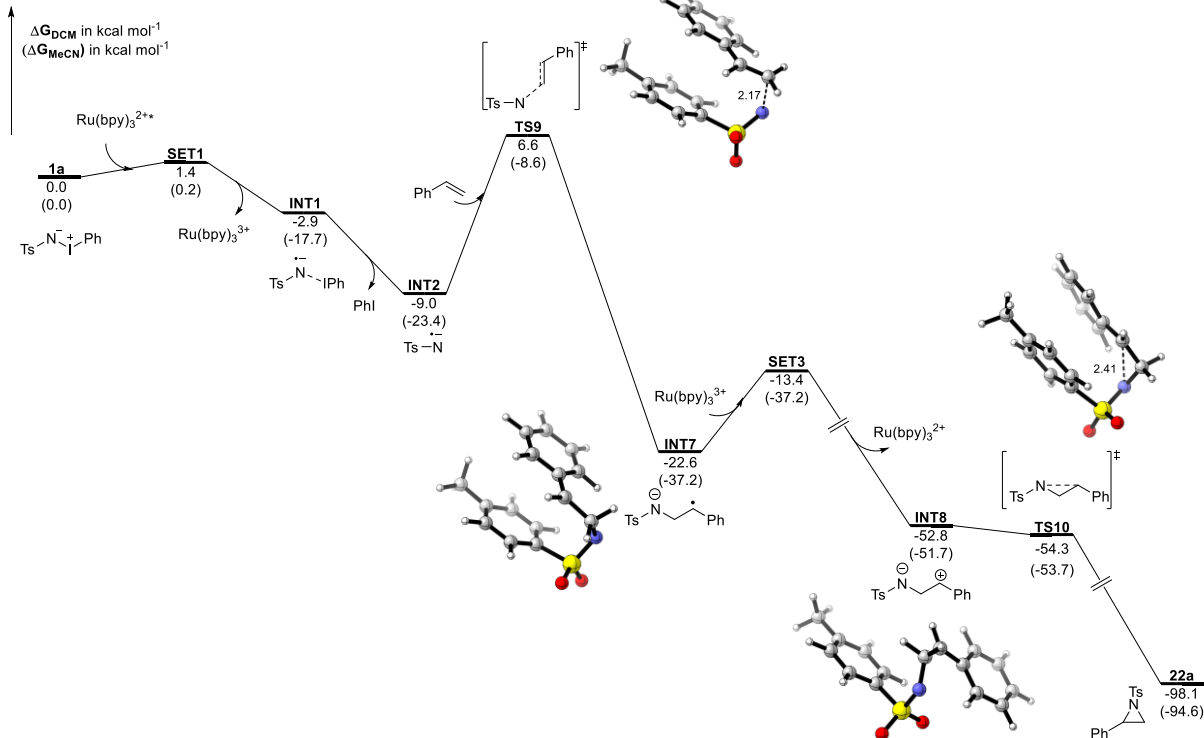

**Supplementary Figure 13.** Relative free-energy profile of photocatalytic reaction of iminoiodanine **1a** with styrene.

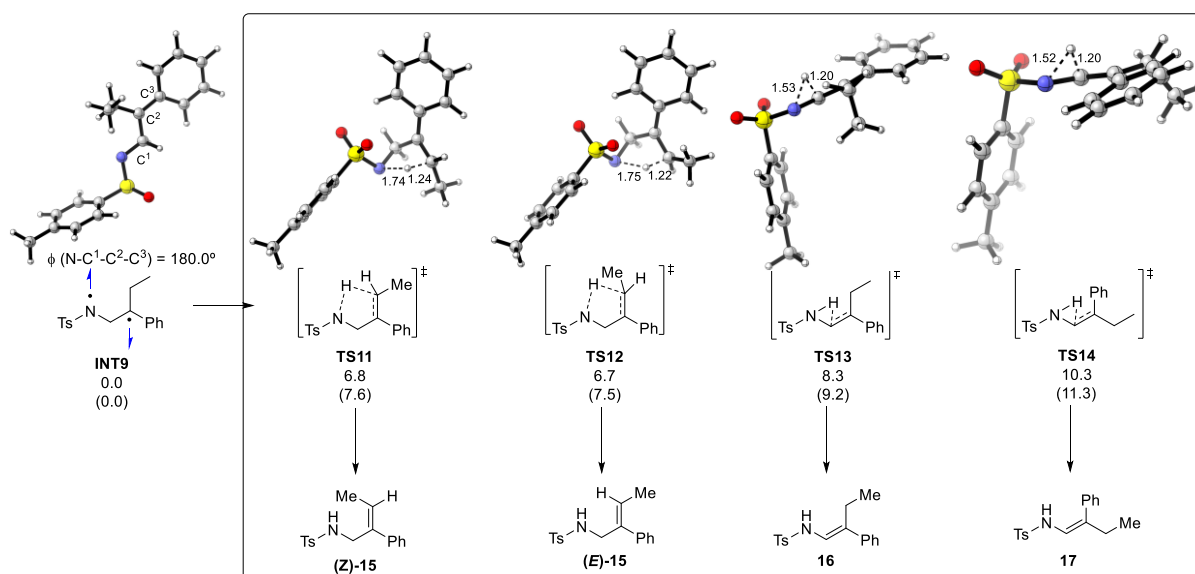

**Supplementary Figure 14.** Selective H-transfer step of of **INT9** from  $\alpha$ -ethyl styrene **13**.

### Computed energies of all stationary points

**Supplementary Table 5.** Thermal correction to Gibbs free energies (*TCG*, in Hartree), thermal correction to enthalpies (*TCH*, in Hartree), sum of electronic and thermal free energies (*G*, in Hartree), Sum of electronic and thermal enthalpies (*G*, in Hartree), single point energies in dichloromethane computed at the (U)M06-2X-D3/def2-TZVP level (*E<sub>sol</sub>*, in Hartree), and total spin-squared operator of open-shell species *S*<sup>2</sup>.

| Name                                    | <i>TCG</i> /a.u. | <i>TCH</i> /a.u. | <i>G</i> /a.u. | <i>E<sub>DCM</sub></i> /a.u. | <i>E<sub>MeCN</sub></i> /a.u. | <i>S</i> <sup>2</sup> |
|-----------------------------------------|------------------|------------------|----------------|------------------------------|-------------------------------|-----------------------|
| <b>1a</b>                               | 0.177353         | 0.242490         | -1402.290641   | -1403.514800                 | -1403.517404                  | -                     |
| <b>PhI</b>                              | 0.059292         | 0.097728         | -528.933922    | -529.265727                  | -529.264630                   | -                     |
| <b>Ru(bpy)<sub>3</sub><sup>2+</sup></b> | 0.425155         | 0.516648         | -1578.446643   | -1580.731415                 | -1580.743282                  | 2.0154                |
| <b>Ru(bpy)<sub>3</sub><sup>3+</sup></b> | 0.429102         | 0.518877         | -1578.082838   | -1580.590952                 | -1580.622206                  | 0.7551                |
| <b>Ru(bpy)<sub>3</sub><sup>2+</sup></b> | 0.428938         | 0.518655         | -1578.530139   | -1580.807785                 | -1580.818006                  | -                     |
| <b>INT1</b>                             | 0.171647         | 0.241317         | -1402.391271   | -1403.658100                 | -1403.664898                  | 0.7562                |
| <b>INT2</b>                             | 0.091769         | 0.141810         | -873.455084    | -874.384549                  | -874.391828                   | 0.7554                |
| <b>12a</b>                              | 0.130070         | 0.171714         | -348.412462    | -348.939666                  | -348.938195                   | -                     |
| <b>TS1</b>                              | 0.245426         | 0.314092         | -1221.861269   | -1223.321025                 | -1223.326921                  | 0.7833                |
| <b>INT3</b>                             | 0.247321         | 0.316133         | -1221.912959   | -1223.371752                 | -1223.377426                  | 0.7705                |
| <b>INT4</b>                             | 0.250611         | 0.316238         | -1221.802279   | -1223.218386                 | -1223.221399                  | -                     |
| <b>TS2</b>                              | 0.251330         | 0.315886         | -1221.798069   | -1223.217738                 | -1223.220851                  | -                     |
| <b>11a</b>                              | 0.250983         | 0.319436         | -1221.885743   | -1223.272562                 | -1223.271219                  | -                     |

|                         |          |          |              |              |              |        |
|-------------------------|----------|----------|--------------|--------------|--------------|--------|
| <b>1a-T</b>             | 0.172441 | 0.241693 | -1402.289544 | -1403.481074 | -1403.481175 | 2.0105 |
| <b>INT1<sub>T</sub></b> | 0.094300 | 0.141280 | -873.358573  | -874.204410  | -874.204644  | 2.0099 |
| <b>INT1<sub>s</sub></b> | 0.094261 | 0.142582 | -873.335132  | -874.184669  | -874.185024  | -      |
| <b>TS3</b>              | 0.242420 | 0.314998 | -1221.764543 | -1223.149365 | -1223.148069 | 2.0422 |
| <b>INT3<sub>T</sub></b> | 0.241798 | 0.315996 | -1221.806492 | -1223.189179 | -1223.187874 | 2.0267 |
| <b>INT3<sub>s</sub></b> | 0.241760 | 0.314988 | -1221.808396 | -1223.204017 | -1223.205534 | 0.7808 |
| <b>TS4</b>              | 0.243793 | 0.312832 | -1221.799781 | -1223.200383 | -1223.200870 | -      |
| <b>10a</b>              | 0.251686 | 0.31984  | -1221.891522 | -1223.288158 | -1223.288344 | -      |
| <b>TS5</b>              | 0.245307 | 0.314771 | -1221.803881 | -1223.197938 | -1223.199454 | 0.8932 |
| <b>TS6</b>              | 0.236607 | 0.309412 | -1221.752338 | -1223.129951 | -1223.128657 | 2.0284 |
| <b>INT5<sub>T</sub></b> | 0.238007 | 0.313213 | -1221.778834 | -1223.156505 | -1223.154975 | 2.0419 |
| <b>styrene</b>          | 0.102670 | 0.142140 | -309.173011  | -309.628699  | -309.627427  | -      |
| <b>TS7</b>              | 0.216379 | 0.285421 | -1182.521147 | -1183.835609 | -1183.834411 | 2.0477 |
| <b>INT6<sub>T</sub></b> | 0.216294 | 0.286095 | -1182.563882 | -1183.878730 | -1183.877660 | 2.0305 |
| <b>INT6<sub>s</sub></b> | 0.217186 | 0.285917 | -1182.562806 | -1183.878956 | -1183.875006 | 1.0058 |
| <b>TS8</b>              | 0.219382 | 0.285469 | -1182.559469 | -1183.879009 | -1183.877547 | 0.9625 |
| <b>22a</b>              | 0.224321 | 0.290284 | -1182.644777 | -1183.965078 | -1183.964015 | -      |
| <b>TS9</b>              | 0.219275 | 0.284222 | -1182.618210 | -1184.010229 | -1184.016711 | 0.7832 |
| <b>INT7</b>             | 0.222044 | 0.286180 | -1182.670196 | -1184.059547 | -1184.065831 | 0.7740 |
| <b>INT8</b>             | 0.221888 | 0.287355 | -1182.547794 | -1183.890448 | -1183.892743 | -      |
| <b>TS10</b>             | 0.224321 | 0.290284 | -1182.547262 | -1183.896158 | -1183.899277 | -      |
| <b>INT9</b>             | 0.270312 | 0.345461 | -1261.043697 | -1262.508135 | -1262.509447 | 0.8609 |
| <b>TS11</b>             | 0.273122 | 0.343914 | -1261.032913 | -1262.500094 | -1262.500072 | -      |
| <b>TS12</b>             | 0.273639 | 0.343560 | -1261.033268 | -1262.500817 | -1262.500872 | -      |
| <b>TS13</b>             | 0.270931 | 0.344196 | -1261.027899 | -1262.495560 | -1262.495362 | -      |
| <b>TS14</b>             | 0.271056 | 0.344429 | -1261.026378 | -1262.492449 | -1262.492119 | -      |

### Coordinates of all stationary points

|           |             |            |             |   |            |             |             |
|-----------|-------------|------------|-------------|---|------------|-------------|-------------|
| <b>1a</b> |             |            |             | C | 2.23874700 | 0.87723600  | 1.37345400  |
| S         | -1.44134200 | 1.90371500 | 0.03578200  | H | 0.20303400 | 0.80560000  | 2.13252300  |
| O         | -1.70391400 | 3.07529800 | -0.78015200 | H | 0.69779800 | 2.72864600  | -1.67107900 |
| O         | -2.00137500 | 1.77076500 | 1.37748700  | H | 3.16825900 | 2.32619100  | -1.55816900 |
| C         | 0.33089900  | 1.75304200 | 0.20750100  | H | 2.66645600 | 0.36762100  | 2.24002000  |
| C         | 3.08103700  | 1.29213900 | 0.33468500  | C | 4.55415000 | 0.98692900  | 0.37768300  |
| C         | 0.86641000  | 1.11013400 | 1.32053500  | H | 5.12597300 | 1.67539700  | -0.25808900 |
| C         | 1.14779400  | 2.20211600 | -0.82737600 | H | 4.94608000 | 1.05177500  | 1.40164100  |
| C         | 2.51863900  | 1.97189100 | -0.75448700 | H | 4.74215600 | -0.03765100 | 0.01751000  |

|                                          |             |             |             |   |             |             |             |
|------------------------------------------|-------------|-------------|-------------|---|-------------|-------------|-------------|
| N                                        | -1.87849000 | 0.64335300  | -0.96382700 | H | 1.31468600  | 1.51545400  | 2.32004800  |
| I                                        | -1.94846700 | -1.10431300 | 0.02932200  | H | 3.54270100  | 1.52304900  | 3.46897900  |
| C                                        | 0.07070200  | -1.73664100 | -0.20184400 | H | 4.73643400  | -1.71433100 | 0.88302500  |
| C                                        | 2.72013200  | -2.40579800 | -0.50776800 | N | 1.06986800  | -1.58822200 | -0.97117000 |
| C                                        | 0.77390500  | -1.17843100 | -1.26055300 | N | 1.80626400  | -0.05301400 | 1.06022400  |
| C                                        | 0.64212700  | -2.61028100 | 0.71504400  | C | -2.72992100 | -0.94627900 | -0.63805100 |
| C                                        | 1.98592200  | -2.94912700 | 0.54593100  | C | -3.99205800 | -0.99689200 | -1.22631100 |
| C                                        | 2.11804600  | -1.52113800 | -1.40381900 | C | -4.29880600 | -0.11011400 | -2.25685100 |
| H                                        | 0.28361100  | -0.46683600 | -1.93006500 | C | -3.34015800 | 0.80938700  | -2.67221900 |
| H                                        | 0.07123000  | -3.01379600 | 1.55308000  | C | -2.09996300 | 0.81050000  | -2.04179400 |
| H                                        | 2.45922800  | -3.63411100 | 1.25075400  | C | -2.30603600 | -1.82648800 | 0.47890100  |
| H                                        | 2.69603400  | -1.08587400 | -2.22069400 | C | -3.10473900 | -2.83812600 | 1.01213100  |
| H                                        | 3.77101700  | -2.67218900 | -0.62979100 | C | -2.61649500 | -3.60438300 | 2.06784700  |
| <b>PhI</b>                               |             |             |             | C | -1.34040500 | -3.34754200 | 2.56355200  |
| C                                        | 2.63733400  | -1.20576800 | -0.00000100 | C | -0.59669900 | -2.32754900 | 1.98012200  |
| C                                        | 1.24236400  | -1.21381300 | 0.00000000  | H | -5.28374000 | -0.13601300 | -2.72494400 |
| C                                        | 0.55723200  | -0.00000300 | 0.00000000  | H | -1.31412800 | 1.51598500  | -2.32006900 |
| C                                        | 1.24236200  | 1.21381300  | 0.00000000  | H | -4.09854900 | -3.03171900 | 0.61214500  |
| C                                        | 2.63732800  | 1.20577100  | -0.00000100 | H | -3.23036800 | -4.39679000 | 2.49817900  |
| C                                        | 3.33651400  | 0.00000100  | -0.00000200 | H | 0.40857300  | -2.08488900 | 2.33304100  |
| H                                        | 3.17755200  | -2.15369600 | -0.00000100 | C | -0.46508400 | 2.78598000  | 0.53496900  |
| H                                        | 0.69579100  | -2.15692000 | 0.00000000  | C | -1.76594900 | 1.43631000  | 1.99890700  |
| H                                        | 0.69578100  | 2.15691500  | 0.00000000  | C | -2.33679800 | 2.53068500  | 2.59467800  |
| H                                        | 3.17754900  | 2.15369800  | -0.00000100 | C | -1.94987400 | 3.82511100  | 2.14311100  |
| H                                        | 4.42711500  | 0.00000600  | -0.00000200 | C | -1.03593400 | 3.94699600  | 1.13072200  |
| I                                        | -1.54891700 | 0.00000000  | 0.00000100  | C | 0.46646900  | 2.78573000  | -0.53505000 |
| <b>Ru(bpy)<sub>3</sub><sup>2+</sup>*</b> |             |             |             | C | 1.76655700  | 1.43537200  | -1.99903500 |
| C                                        | 2.30520200  | -1.82747500 | -0.47887000 | C | 2.33801900  | 2.52944300  | -2.59477900 |
| C                                        | 0.59563700  | -2.32787500 | -1.98005300 | C | 1.95183800  | 3.82407400  | -2.14316600 |
| C                                        | 1.33895700  | -3.34811700 | -2.56353900 | C | 1.03797300  | 3.94644100  | -1.13076700 |
| C                                        | 2.61497700  | -3.60542200 | -2.06789200 | H | -2.02630100 | 0.42368200  | 2.31591100  |
| C                                        | 3.10353000  | -2.83937500 | -1.01216600 | H | -2.38639400 | 4.71553600  | 2.59611200  |
| C                                        | 2.72943500  | -0.94746300 | 0.63810800  | H | 2.02633300  | 0.42260800  | -2.31608000 |
| C                                        | 2.10021000  | 0.80960600  | 2.04181400  | H | 2.38886300  | 4.71426500  | -2.59613800 |
| C                                        | 3.34036700  | 0.80791700  | 2.67231300  | H | 0.74986100  | 4.93160400  | -0.76689800 |
| C                                        | 4.29860800  | -0.11203800 | 2.25701200  | N | -1.07062600 | -1.58770000 | 0.97124100  |
| C                                        | 3.99150800  | -0.99867300 | 1.22645300  | N | 0.83681100  | 1.53649700  | -1.01582400 |
| H                                        | -0.40956100 | -2.08484500 | -2.33292600 | H | -0.92241800 | -3.92318300 | 3.38879300  |
| H                                        | 0.92073600  | -3.92358700 | -3.38878200 | H | -4.73730600 | -1.71218600 | -0.88282200 |
| H                                        | 4.09729000  | -3.03332800 | -0.61223300 | H | -3.54220600 | 1.52461200  | -3.46887500 |
|                                          |             |             |             | H | -3.06294700 | 2.40044500  | 3.39469300  |
|                                          |             |             |             | H | 3.06407700  | 2.39881500  | -3.39481300 |

|                                         |             |             |             |                                         |             |             |             |
|-----------------------------------------|-------------|-------------|-------------|-----------------------------------------|-------------|-------------|-------------|
| H                                       | 3.22855700  | -4.39802600 | -2.49828000 | C                                       | -1.42960000 | 1.77033200  | -2.05162100 |
| H                                       | 5.28349600  | -0.13840400 | 2.72517300  | C                                       | -2.51542300 | 2.35630600  | -2.69242000 |
| N                                       | -0.83613100 | 1.53694500  | 1.01571200  | C                                       | -3.79845000 | 2.05141700  | -2.24261600 |
| N                                       | -1.80636000 | -0.05225600 | -1.06022000 | C                                       | -3.95400200 | 1.17478900  | -1.16960800 |
| Ru                                      | -0.00003200 | -0.01511300 | -0.00001000 | C                                       | -2.87293100 | -0.31773700 | 0.57437400  |
| H                                       | -0.74725900 | 4.93200800  | 0.76689200  | C                                       | -1.60540500 | -1.59859000 | 2.06210600  |
| <b>Ru(bpy)<sub>3</sub><sup>3+</sup></b> |             |             |             | C                                       | -2.74656600 | -2.07024800 | 2.70096500  |
| C                                       | 1.71363700  | -2.31634400 | 0.57640600  | C                                       | -3.99127600 | -1.64167000 | 2.24442700  |
| C                                       | 2.20893200  | -0.56451000 | 2.04111400  | C                                       | -4.05464300 | -0.75781300 | 1.16803200  |
| C                                       | 3.19798900  | -1.31013300 | 2.67268100  | H                                       | -0.40615000 | 1.98061400  | -2.36953700 |
| C                                       | 3.44364700  | -2.60630200 | 2.22445200  | H                                       | -4.67486200 | 2.49329500  | -2.72019000 |
| C                                       | 2.69477200  | -3.11350200 | 1.16347800  | H                                       | -0.60960600 | -1.90940100 | 2.38514900  |
| C                                       | 0.86484300  | -2.75308400 | -0.55606300 | H                                       | -4.90909300 | -1.99301200 | 2.71938200  |
| C                                       | -0.84327600 | -2.13542300 | -2.02623600 | H                                       | -5.02183400 | -0.41971800 | 0.79862300  |
| C                                       | -0.81531000 | -3.37575500 | -2.65368000 | N                                       | 1.58983800  | 0.89144000  | -1.02782900 |
| C                                       | 0.09158200  | -4.33147700 | -2.20047000 | N                                       | -1.66805300 | -0.74058100 | 1.03222900  |
| C                                       | 0.93866800  | -4.01706400 | -1.13862900 | H                                       | 3.84271000  | 0.45008000  | -3.49101300 |
| H                                       | 1.98277900  | 0.45543000  | 2.35935800  | H                                       | 2.15938000  | 4.55454700  | 0.76260100  |
| H                                       | 3.76134500  | -0.87584100 | 3.49881100  | H                                       | -1.10625600 | 3.74348000  | 3.46053600  |
| H                                       | 2.88113800  | -4.12345100 | 0.80090500  | H                                       | -2.35044600 | 3.03842100  | -3.52667500 |
| H                                       | -1.53875500 | -1.35727800 | -2.34782500 | H                                       | -2.65334000 | -2.76141000 | 3.53886500  |
| H                                       | -1.49562500 | -3.58154100 | -3.48029600 | H                                       | 4.21385800  | -3.22075300 | 2.69414200  |
| H                                       | 1.64772500  | -4.75780600 | -0.77159200 | H                                       | 0.14036900  | -5.31724100 | -2.66662700 |
| N                                       | 1.48330700  | -1.05758900 | 1.02586800  | N                                       | -1.58189700 | 0.91892800  | -1.02577100 |
| N                                       | -0.02054900 | -1.83128300 | -1.01068500 | N                                       | 0.18031800  | 1.82896600  | 1.00742200  |
| C                                       | 1.16309000  | 2.64622200  | 0.55269300  | Ru                                      | -0.00485300 | 0.00240300  | 0.00044000  |
| C                                       | 1.37223200  | 3.89750900  | 1.12984200  | H                                       | -4.95161300 | 0.93332300  | -0.80534100 |
| C                                       | 0.55983000  | 4.30820500  | 2.18580800  | <b>Ru(bpy)<sub>3</sub><sup>2+</sup></b> |             |             |             |
| C                                       | -0.44842800 | 3.45987800  | 2.63877800  | C                                       | -1.56014600 | -2.43557300 | -0.58527900 |
| C                                       | -0.60884900 | 2.22667300  | 2.01737500  | C                                       | -2.11569600 | -0.76363000 | -2.10026700 |
| C                                       | 1.96222600  | 2.11457600  | -0.57543500 | C                                       | -3.04213000 | -1.58011900 | -2.74057100 |
| C                                       | 3.03284300  | 2.79280300  | -1.15578500 | C                                       | -3.22283100 | -2.87739400 | -2.26842200 |
| C                                       | 3.72317000  | 2.20327200  | -2.21382600 | C                                       | -2.47322100 | -3.30949700 | -1.17814100 |
| C                                       | 3.33004500  | 0.94546900  | -2.66626800 | C                                       | -0.71364200 | -2.80486700 | 0.57766300  |
| C                                       | 2.25793200  | 0.31905000  | -2.04096000 | C                                       | 0.89248500  | -2.07593100 | 2.09039800  |
| H                                       | 0.71396700  | 5.28510400  | 2.64768000  | C                                       | 0.92444000  | -3.31057800 | 2.73041200  |
| H                                       | -1.38626000 | 1.53054800  | 2.33921600  | C                                       | 0.09460200  | -4.32468200 | 2.25979700  |
| H                                       | 3.33383300  | 3.77343300  | -0.78979200 | C                                       | -0.73334600 | -4.06853900 | 1.17062600  |
| H                                       | 4.56249000  | 2.72417400  | -2.67814200 | H                                       | -1.93838700 | 0.26059800  | -2.43510100 |
| H                                       | 1.91579300  | -0.66677600 | -2.36295900 | H                                       | -3.60670900 | -1.19898800 | -3.59088700 |
| C                                       | -2.82440900 | 0.61762800  | -0.57279400 | H                                       | -2.60428800 | -4.31995300 | -0.79531200 |

|   |             |             |             |             |             |             |             |
|---|-------------|-------------|-------------|-------------|-------------|-------------|-------------|
| H | 1.52363400  | -1.24969400 | 2.42446500  | H           | -3.94022300 | -3.54859200 | -2.74196800 |
| H | 1.58933300  | -3.46586500 | 3.57944300  | H           | 0.09042000  | -5.30705000 | 2.73343700  |
| H | -1.38584900 | -4.85148700 | 0.78852700  | N           | 1.53786900  | 0.99009500  | 1.05125500  |
| N | -1.39265900 | -1.17833000 | -1.05307700 | N           | -0.32843500 | 1.80145400  | -1.04559600 |
| N | 0.09480200  | -1.82723200 | 1.04482500  | Ru          | 0.00244500  | 0.00086300  | -0.00083800 |
| C | -1.33876500 | 2.56767200  | -0.57678000 | H           | 4.89634700  | 1.23166900  | 0.79440800  |
| C | -1.64841000 | 3.79334400  | -1.16886500 |             |             |             |             |
| C | -0.90289900 | 4.23277400  | -2.25900200 | <b>INT1</b> |             |             |             |
| C | 0.13661400  | 3.43603400  | -2.73137700 | S           | 0.11986900  | -2.82809500 | -0.28738600 |
| C | 0.38950700  | 2.22678000  | -2.09206600 | O           | -0.67290500 | -3.97339800 | -0.77169700 |
| C | -2.07633500 | 2.01406500  | 0.58726000  | O           | 0.96993000  | -3.01695900 | 0.90087300  |
| C | -3.16410600 | 2.65548800  | 1.18240400  | C           | -1.15610300 | -1.66613700 | 0.29380300  |
| C | -3.79290600 | 2.06266200  | 2.27348100  | C           | -2.98333500 | 0.37124000  | 0.93792700  |
| C | -3.31921000 | 0.84097500  | 2.74418900  | C           | -0.88932600 | -0.79569000 | 1.34878700  |
| C | -2.23160400 | 0.25854100  | 2.10173500  | C           | -2.35212600 | -1.54977800 | -0.41375800 |
| H | -1.13280600 | 5.18814600  | -2.73205300 | C           | -3.25666500 | -0.54107400 | -0.08932400 |
| H | 1.19288900  | 1.56733800  | -2.42715600 | C           | -1.79474400 | 0.21755800  | 1.66032000  |
| H | -3.52363700 | 3.60933700  | 0.80073000  | H           | 0.04058500  | -0.92803400 | 1.90524100  |
| H | -4.64404300 | 2.55155500  | 2.74881800  | H           | -2.55218900 | -2.26482800 | -1.21466700 |
| H | -1.82401200 | -0.69807000 | 2.43540800  | H           | -4.19240300 | -0.44935400 | -0.64900800 |
| C | 2.78911000  | 0.78485200  | 0.58247100  | H           | -1.57153200 | 0.91112500  | 2.47647600  |
| C | 1.35233600  | 1.79944300  | 2.10095000  | C           | -3.92253800 | 1.51073900  | 1.23835800  |
| C | 2.40388300  | 2.44446400  | 2.74374200  | H           | -4.92932300 | 1.31546100  | 0.84239500  |
| C | 3.69744400  | 2.23936500  | 2.27129200  | H           | -4.00631100 | 1.68777900  | 2.32068800  |
| C | 3.89169600  | 1.40026100  | 1.17785800  | H           | -3.55494600 | 2.44332100  | 0.77919200  |
| C | 2.89443000  | -0.12740100 | -0.58455800 | N           | 0.90220800  | -2.15607600 | -1.47310400 |
| C | 1.72672300  | -1.44151500 | -2.10406600 | I           | 2.42640400  | 0.68350800  | 0.31184100  |
| C | 2.89782500  | -1.83102000 | -2.74580200 | C           | 0.70499500  | 1.62567400  | -0.45412400 |
| C | 4.11066300  | -1.33776400 | -2.27227100 | C           | -1.60488300 | 2.82233500  | -1.41625500 |
| C | 4.10842800  | -0.47640600 | -1.17887900 | C           | -0.07677700 | 0.93466400  | -1.37814200 |
| H | 0.32087700  | 1.92815900  | 2.43577200  | C           | 0.35364300  | 2.89629300  | 0.00023400  |
| H | 4.54902300  | 2.72730900  | 2.74681700  | C           | -0.80963300 | 3.49327400  | -0.48737800 |
| H | 0.75181100  | -1.80117300 | -2.43994800 | C           | -1.23690200 | 1.54966400  | -1.85256200 |
| H | 5.05112200  | -1.61983000 | -2.74700400 | H           | 0.20229900  | -0.08550100 | -1.68079700 |
| H | 5.04829000  | -0.08427600 | -0.79460500 | H           | 0.97811500  | 3.41157800  | 0.73108500  |
| N | -1.62448500 | 0.82842700  | 1.05379600  | H           | -1.09314200 | 4.48710300  | -0.13429200 |
| N | 1.72274300  | -0.61140800 | -1.05417600 | H           | -1.86599800 | 1.00914100  | -2.56210300 |
| H | -3.78009000 | 0.34032800  | 3.59506500  | H           | -2.51777600 | 3.28861200  | -1.79259700 |
| H | -2.46245100 | 4.40575600  | -0.78538200 |             |             |             |             |
| H | 0.74696200  | 3.73981200  | -3.58122200 | <b>INT2</b> |             |             |             |
| H | 2.20428400  | 3.09300400  | 3.59615600  | S           | 2.01351600  | 0.01067600  | -0.00041600 |
| H | 2.85142700  | -2.50788400 | -3.59829900 | O           | 2.32324900  | -0.99647000 | -1.03384500 |



O 2.29529700 -0.36410500 1.39867600  
 C 0.18260600 0.01918100 -0.03058600  
 C -2.62865500 0.01773900 0.00223600  
 C -0.51759000 -1.18924100 -0.01052100  
 C -0.51501300 1.21989800 -0.04445700  
 C -1.91277900 1.21659800 -0.02651300  
 C -1.90814700 -1.18677700 0.00774800  
 H 0.05107600 -2.12132100 -0.02053100  
 H 0.06904200 2.14282300 -0.08194600  
 H -2.45923800 2.16434800 -0.03866400  
 H -2.45463800 -2.13498200 0.02288200  
 C -4.13704000 0.00375100 0.01894900  
 H -4.54326600 1.02481100 0.02660200  
 H -4.54275900 -0.51424100 -0.86420900  
 H -4.52234500 -0.51988500 0.90774100  
 N 2.55103100 1.43790600 -0.33785900

**12a**

C -1.85368500 -1.22748700 -0.19220900  
 C -0.46104400 -1.16259100 -0.18635300  
 C 0.20588900 0.05838000 -0.00851900  
 C -0.57242800 1.20917600 0.19541400  
 C -1.96210800 1.14602100 0.19283800  
 C -2.61084600 -0.07350200 -0.00573900  
 H -2.34831800 -2.18849200 -0.34204800  
 H 0.11249300 -2.07820000 -0.33507300  
 H -0.07847900 2.16357300 0.38319500  
 H -2.54416800 2.05396300 0.35883800  
 H -3.70062100 -0.12381300 -0.00461300  
 C 1.69411200 0.12435900 -0.02355300  
 C 2.34540300 1.24510400 -0.36112000  
 H 1.81845200 2.14701400 -0.67644400  
 H 3.43647100 1.28205600 -0.35040400  
 C 2.44586100 -1.13094600 0.33704200  
 H 2.31787500 -1.90466300 -0.43569500  
 H 3.51993200 -0.92830800 0.43123400  
 H 2.07944500 -1.55421400 1.28420100

**TS1**

S -2.25029400 -1.24815200 -0.42335500  
 N -1.07438600 -2.20881500 -0.84345100  
 O -2.77152500 -1.42180100 0.95434700

O -3.26052600 -1.23396700 -1.49537300  
 C -1.61250600 0.45734100 -0.36507500  
 C -0.45005300 0.78407700 -1.05835500  
 H 0.04545600 -0.00052700 -1.63352100  
 C 0.08199700 2.06753900 -0.95689000  
 H 1.01438100 2.30760000 -1.47620500  
 C -0.54638400 3.04739600 -0.17776100  
 C -1.72434100 2.70602000 0.49736100  
 H -2.22128200 3.45784700 1.11716700  
 C -2.25405400 1.41869800 0.41170300  
 H -3.14529100 1.12853200 0.97111600  
 C 3.96422400 0.39173100 0.38850000  
 C 2.81114200 0.01375900 1.07359600  
 C 1.93493600 -0.95413200 0.54909100  
 C 2.24266200 -1.50017400 -0.71479700  
 C 3.39265700 -1.11771200 -1.39722200  
 C 4.26709800 -0.17487900 -0.84928600  
 H 4.63010100 1.14011600 0.82437300  
 H 2.58363700 0.47245100 2.03750500  
 H 1.51859500 -2.17647700 -1.17562100  
 H 3.59975900 -1.54477000 -2.38103800  
 H 5.16611400 0.12645100 -1.39050500  
 C 0.70993900 -1.34704700 1.26041400  
 C 0.08190200 -2.52436800 0.96271400  
 H -0.81810800 -2.81194700 1.50569500  
 H 0.59400100 -3.30225900 0.39921400  
 C 0.11537200 -0.38453200 2.25512700  
 C 0.04270000 4.43186300 -0.07368800  
 H -0.01958100 4.96505100 -1.03546900  
 H -0.48499900 5.03393500 0.67896900  
 H 1.10589900 4.38900900 0.20665500  
 H 0.17112600 0.65373000 1.88732900  
 H 0.64223100 -0.42203500 3.22586400  
 H -0.94395300 -0.63190500 2.41193100

**INT3**

S -2.08564000 -1.35408000 -0.43340700  
 N -0.78469600 -2.22033400 -0.55008500  
 O -2.82525700 -1.51788600 0.84292200  
 O -2.87283200 -1.44383100 -1.66503800  
 C -1.57301800 0.39726200 -0.36233500  
 C -0.45110000 0.81394400 -1.07836700

|             |             |             |             |            |             |             |             |
|-------------|-------------|-------------|-------------|------------|-------------|-------------|-------------|
| H           | 0.09882900  | 0.07336700  | -1.66343500 | C          | -1.45737800 | 2.21139300  | -0.24867900 |
| C           | -0.02290800 | 2.13514500  | -0.99150000 | C          | -1.05984200 | 1.84953700  | 1.05225900  |
| H           | 0.87497300  | 2.44829100  | -1.53204100 | H          | -1.76187600 | 1.98505500  | 1.87946400  |
| C           | -0.71202500 | 3.06575100  | -0.20077200 | C          | 0.19953200  | 1.32052500  | 1.29751800  |
| C           | -1.84200200 | 2.63360400  | 0.50039600  | H          | 0.51296600  | 1.02133500  | 2.30033100  |
| H           | -2.38543800 | 3.34557500  | 1.12833000  | C          | -3.31429100 | -1.00643500 | 0.14512500  |
| C           | -2.27068700 | 1.30667000  | 0.42606400  | C          | -2.26727200 | -1.07754500 | -0.75677600 |
| H           | -3.12810400 | 0.94550300  | 0.99696500  | C          | -0.96729100 | -1.45113700 | -0.32584700 |
| C           | 3.85954400  | 0.57983800  | 0.41825100  | C          | -0.76033800 | -1.76097400 | 1.04296900  |
| C           | 2.68963000  | 0.19584200  | 1.06162900  | C          | -1.82943000 | -1.71700700 | 1.93027300  |
| C           | 1.88075500  | -0.85693400 | 0.55865400  | C          | -3.09613600 | -1.33643100 | 1.48880900  |
| C           | 2.30933500  | -1.48249100 | -0.64536600 | H          | -4.30580000 | -0.70235500 | -0.19160500 |
| C           | 3.47596900  | -1.08518800 | -1.28166800 | H          | -2.44365100 | -0.81549800 | -1.80045500 |
| C           | 4.26862700  | -0.05663000 | -0.75687300 | H          | 0.24965400  | -2.01623200 | 1.36804000  |
| H           | 4.46164000  | 1.38997300  | 0.83667000  | H          | -1.66863800 | -1.97194900 | 2.97804200  |
| H           | 2.38928900  | 0.70846200  | 1.97670300  | H          | -3.92713500 | -1.29461200 | 2.19548500  |
| H           | 1.66133000  | -2.23600300 | -1.09630700 | C          | 0.10832300  | -1.49423600 | -1.27132900 |
| H           | 3.76945800  | -1.57430200 | -2.21338200 | C          | 1.54373000  | -1.60896100 | -0.90273200 |
| H           | 5.18491900  | 0.25131200  | -1.26380200 | H          | 1.62692000  | -2.71637300 | -1.12046100 |
| C           | 0.67437900  | -1.26628700 | 1.21103500  | H          | 2.14583900  | -1.16986700 | -1.72963000 |
| C           | -0.09321900 | -2.46736700 | 0.70661500  | C          | -0.18435300 | -1.55096600 | -2.73024100 |
| H           | -0.78818900 | -2.79384300 | 1.50238600  | H          | -1.02809200 | -2.20727500 | -2.97758000 |
| H           | 0.61237200  | -3.29894000 | 0.53230800  | H          | 0.70688300  | -1.84011900 | -3.30025400 |
| C           | 0.08233000  | -0.44978500 | 2.31789900  | H          | -0.45108100 | -0.52423900 | -3.03738200 |
| C           | -0.23355300 | 4.49328500  | -0.11374000 | C          | -2.83393100 | 2.77183700  | -0.48765300 |
| H           | -0.34158700 | 5.00997700  | -1.08043900 | H          | -3.03423700 | 2.90347300  | -1.55915800 |
| H           | -0.80390100 | 5.05954300  | 0.63565400  | H          | -2.94911000 | 3.75121200  | 0.00047100  |
| H           | 0.83101200  | 4.53805800  | 0.16170300  | H          | -3.60550600 | 2.10771000  | -0.06910700 |
| H           | 0.15813100  | 0.63113500  | 2.11117900  |            |             |             |             |
| H           | 0.58423700  | -0.63768200 | 3.28696100  | <b>TS2</b> |             |             |             |
| H           | -0.98349100 | -0.69903200 | 2.42303900  | S          | -2.49164900 | 0.32861600  | -0.51316300 |
|             |             |             |             | N          | -2.07798900 | -1.20400300 | -0.64340800 |
| <b>INT4</b> |             |             |             | O          | -3.22106400 | 0.61143800  | 0.73618500  |
| S           | 2.58230100  | 0.15779000  | 0.49720500  | O          | -3.02360200 | 0.79794000  | -1.78192200 |
| N           | 1.98596400  | -1.32553800 | 0.39581400  | C          | -0.91467200 | 1.19245800  | -0.28281900 |
| O           | 3.03550200  | 0.40635900  | 1.85467500  | C          | 0.00973700  | 1.19729100  | -1.33076200 |
| O           | 3.45041000  | 0.49599900  | -0.63782100 | H          | -0.29577300 | 0.80760000  | -2.30463800 |
| C           | 1.09121300  | 1.14318400  | 0.23666000  | C          | 1.29434200  | 1.67373100  | -1.10948300 |
| C           | 0.73164000  | 1.52433200  | -1.05361500 | H          | 2.02367000  | 1.66824900  | -1.92441100 |
| H           | 1.46575400  | 1.41388300  | -1.85555200 | C          | 1.68088200  | 2.16545600  | 0.15178900  |
| C           | -0.54043300 | 2.05747700  | -1.29004800 | C          | 0.73113000  | 2.18882300  | 1.17423500  |
| H           | -0.82121600 | 2.36355200  | -2.30161700 | H          | 1.00480900  | 2.59635500  | 2.15093700  |

|   |             |             |             |
|---|-------------|-------------|-------------|
| C | -0.56511700 | 1.70644200  | 0.96031700  |
| H | -1.32744600 | 1.73382900  | 1.74213300  |
| C | 1.87576100  | -2.00812300 | -1.71170000 |
| C | 0.71372000  | -1.92139800 | -0.96215100 |
| C | 0.77330100  | -1.49743900 | 0.39395500  |
| C | 2.02437800  | -1.10737300 | 0.93589200  |
| C | 3.17527800  | -1.17223400 | 0.16662300  |
| C | 3.10101600  | -1.63556900 | -1.15049000 |
| H | 1.82895100  | -2.34938800 | -2.74593400 |
| H | -0.26705100 | -2.13188000 | -1.39515300 |
| H | 2.08893600  | -0.73639900 | 1.95801300  |
| H | 4.13293600  | -0.86730100 | 0.58890200  |
| H | 4.01057700  | -1.69547200 | -1.75145100 |
| C | -0.41022300 | -1.51674300 | 1.19389900  |
| C | -1.77676500 | -1.78581500 | 0.61975600  |
| H | -2.51481000 | -1.55535400 | 1.41256600  |
| H | -1.78004000 | -2.89989000 | 0.53702100  |
| C | 3.08290300  | 2.66991100  | 0.36668400  |
| H | 3.27477600  | 3.56765100  | -0.23989600 |
| H | 3.26019200  | 2.92938700  | 1.41867800  |
| H | 3.82391000  | 1.91285500  | 0.06652800  |
| C | -0.38676600 | -1.34840000 | 2.66063700  |
| H | 0.59800200  | -1.33190300 | 3.13336700  |
| H | -0.93716500 | -0.41473900 | 2.87247300  |
| H | -1.00825800 | -2.14458100 | 3.10294400  |

### 11a

|   |             |             |             |
|---|-------------|-------------|-------------|
| S | -0.67470300 | -1.26996300 | 0.57987400  |
| N | 0.48114600  | -0.45107800 | -0.33268900 |
| O | -0.28824000 | -1.06647900 | 1.96472500  |
| O | -0.89485500 | -2.61280200 | 0.05415500  |
| C | -2.11915900 | -0.30824300 | 0.22814500  |
| C | -3.02990400 | -0.76595900 | -0.71656000 |
| H | -2.85519400 | -1.71980800 | -1.21575900 |
| C | -4.15840200 | 0.00680100  | -0.98768600 |
| H | -4.88310000 | -0.34081000 | -1.72643800 |
| C | -4.38022300 | 1.21710200  | -0.32361300 |
| C | -3.44490400 | 1.64377100  | 0.63239600  |
| H | -3.61295500 | 2.58301800  | 1.16376800  |
| C | -2.31502200 | 0.88839200  | 0.91683400  |
| H | -1.59053600 | 1.20405400  | 1.66889000  |
| C | 4.99954500  | 1.14795000  | -0.86130800 |

|   |             |             |             |
|---|-------------|-------------|-------------|
| C | 4.04923700  | 0.13651200  | -0.98930200 |
| C | 2.86832700  | 0.18195900  | -0.24366800 |
| C | 2.64819100  | 1.24352000  | 0.63588600  |
| C | 3.60080400  | 2.25257000  | 0.76713200  |
| C | 4.77660000  | 2.20740600  | 0.01836700  |
| H | 5.91633900  | 1.11046500  | -1.45169400 |
| H | 4.22117400  | -0.69375400 | -1.67913800 |
| H | 1.71905100  | 1.26347200  | 1.20873900  |
| H | 3.42380800  | 3.07939500  | 1.45673500  |
| H | 5.52015700  | 2.99945700  | 0.11909300  |
| C | 1.86219300  | -0.93006800 | -0.34729400 |
| C | 0.99506600  | -1.03396900 | -1.55930000 |
| H | 0.63074500  | -2.03526100 | -1.81135700 |
| H | 1.11336900  | -0.32754100 | -2.38433700 |
| C | 2.24753700  | -2.19170900 | 0.40324600  |
| H | 2.32311600  | -1.97203200 | 1.47678100  |
| H | 1.50852700  | -2.98954900 | 0.25872800  |
| H | 3.22836200  | -2.53458100 | 0.04675400  |
| C | -5.60174600 | 2.04935200  | -0.60752300 |
| H | -6.19480100 | 1.62407400  | -1.42677100 |
| H | -6.24446300 | 2.11205200  | 0.28304400  |
| H | -5.32044000 | 3.07622500  | -0.88173700 |

### 1a-T

|   |             |            |             |
|---|-------------|------------|-------------|
| S | -2.04469300 | 2.01069200 | -0.10937000 |
| O | -2.37956000 | 3.28795800 | -0.71054600 |
| O | -2.79773900 | 1.45492200 | 0.99597400  |
| C | -0.31852800 | 1.96215100 | 0.24849300  |
| C | 2.41524700  | 1.78985600 | 0.71272800  |
| C | 0.13872200  | 1.17994600 | 1.30717700  |
| C | 0.55395900  | 2.68107700 | -0.57048700 |
| C | 1.91901300  | 2.58604000 | -0.33030600 |
| C | 1.50927200  | 1.10068100 | 1.52975500  |
| H | -0.57836400 | 0.64363200 | 1.93082100  |
| H | 0.15617600  | 3.30438000 | -1.37308200 |
| H | 2.61752800  | 3.13544200 | -0.96464900 |
| H | 1.88650300  | 0.48308400 | 2.34739600  |
| C | 3.89378500  | 1.69455700 | 0.96943300  |
| H | 4.47045900  | 1.89627300 | 0.05709000  |
| H | 4.20024200  | 2.42973200 | 1.72987000  |
| H | 4.16285300  | 0.69609300 | 1.33974300  |
| N | -2.10638200 | 0.88937300 | -1.41104400 |

|   |             |             |             |
|---|-------------|-------------|-------------|
| I | -1.34660500 | -2.07084600 | 0.19551800  |
| C | 0.64757000  | -1.68568700 | -0.35359600 |
| C | 3.28030000  | -1.12318200 | -1.04709900 |
| C | 0.90622600  | -0.85871100 | -1.44593000 |
| C | 1.68657900  | -2.23608000 | 0.39602800  |
| C | 3.00552800  | -1.95028800 | 0.04158000  |
| C | 2.23022400  | -0.57954400 | -1.78611000 |
| H | 0.08312600  | -0.43426000 | -2.02295900 |
| H | 1.47054400  | -2.88350100 | 1.24642600  |
| H | 3.82196800  | -2.38473300 | 0.62128600  |
| H | 2.43619600  | 0.06910600  | -2.63925400 |
| H | 4.31361200  | -0.90503300 | -1.32133100 |

**INT1r**

|   |             |             |             |
|---|-------------|-------------|-------------|
| S | 1.94656300  | -0.00086600 | -0.07442800 |
| O | 2.42666700  | -1.27151300 | -0.58021500 |
| O | 2.43030300  | 1.27024800  | -0.57550500 |
| C | 0.18215600  | 0.00135500  | -0.05987500 |
| C | -2.59629400 | 0.00517500  | 0.01112800  |
| C | -0.49230800 | 1.22092400  | -0.04351100 |
| C | -0.49629100 | -1.21821500 | -0.04349200 |
| C | -1.88488100 | -1.20430000 | -0.00760800 |
| C | -1.88312600 | 1.21093100  | -0.00789600 |
| H | 0.07372200  | 2.15325000  | -0.07241900 |
| H | 0.06793600  | -2.15162800 | -0.07267900 |
| H | -2.43271200 | -2.14873000 | 0.00265800  |
| H | -2.42780700 | 2.15675800  | 0.00230100  |
| C | -4.10039700 | -0.00288800 | 0.02475100  |
| H | -4.49051300 | -0.26916400 | -0.96944200 |
| H | -4.50415100 | 0.98124200  | 0.29320400  |
| H | -4.48418500 | -0.74495800 | 0.73810700  |
| N | 2.26054200  | -0.00438400 | 1.61055600  |

**INT1s**

|   |             |             |             |
|---|-------------|-------------|-------------|
| S | 1.90817800  | 0.15460200  | -0.08987600 |
| O | 2.33327400  | 1.53232100  | -0.13106300 |
| O | 2.43572500  | -0.84394800 | 0.97511500  |
| C | 0.15179600  | 0.08980500  | -0.05148900 |
| C | -2.62084900 | -0.03929700 | 0.00862400  |
| C | -0.46635800 | -1.16045800 | -0.11957100 |
| C | -0.57460900 | 1.27274900  | 0.03385200  |
| C | -1.96547800 | 1.19530700  | 0.06401800  |

|   |             |             |             |
|---|-------------|-------------|-------------|
| C | -1.85212300 | -1.21182900 | -0.08351300 |
| H | 0.14458900  | -2.06104200 | -0.20295000 |
| H | -0.05271600 | 2.22921000  | 0.07551800  |
| H | -2.55213400 | 2.11302000  | 0.13251200  |
| H | -2.35502000 | -2.17975900 | -0.13224900 |
| C | -4.12206600 | -0.12620400 | 0.04110300  |
| H | -4.45681500 | -0.73184500 | 0.89570700  |
| H | -4.50238400 | -0.60844000 | -0.87113900 |
| H | -4.58039600 | 0.86698000  | 0.12208100  |
| N | 2.62430700  | -1.10416800 | -0.67028800 |

**TS3**

|   |             |             |             |
|---|-------------|-------------|-------------|
| S | 0.89520000  | -0.78943900 | -0.89099100 |
| N | -0.00866500 | -0.87845800 | 0.53318600  |
| O | 0.27731400  | 0.21604200  | -1.75056200 |
| O | 1.11703800  | -2.14574600 | -1.36955300 |
| C | 2.43442300  | -0.14011000 | -0.30108400 |
| C | 3.43936800  | -1.02527600 | 0.07845500  |
| H | 3.27889700  | -2.09940900 | -0.02390300 |
| C | 4.63634100  | -0.50772000 | 0.56632300  |
| H | 5.43491700  | -1.18961200 | 0.86487000  |
| C | 4.83419400  | 0.87383700  | 0.67694400  |
| C | 3.80115900  | 1.73729300  | 0.28340200  |
| H | 3.94623000  | 2.81689500  | 0.36107100  |
| C | 2.59937100  | 1.24125400  | -0.20747700 |
| H | 1.79515000  | 1.90433400  | -0.52919100 |
| C | -5.28532500 | 1.43515300  | 0.68395700  |
| C | -4.64458200 | 0.21838500  | 0.89931800  |
| C | -3.43093900 | -0.08229400 | 0.25651400  |
| C | -2.86125000 | 0.89169200  | -0.58608600 |
| C | -3.50107100 | 2.10917200  | -0.79166300 |
| C | -4.71722400 | 2.38469800  | -0.16432900 |
| H | -6.23279400 | 1.64339200  | 1.18316100  |
| H | -5.10330600 | -0.51306600 | 1.56566100  |
| H | -1.89297500 | 0.71035800  | -1.05691500 |
| H | -3.03962900 | 2.85329000  | -1.44240800 |
| H | -5.21632700 | 3.34071900  | -0.32956800 |
| C | -2.75998400 | -1.37396100 | 0.48176700  |
| C | -1.79416700 | -1.83298600 | -0.37518700 |
| H | -1.65083200 | -1.37767400 | -1.35619500 |
| H | -1.34798500 | -2.81708400 | -0.22469100 |
| C | -3.09581300 | -2.15213500 | 1.71939000  |

|   |             |             |            |
|---|-------------|-------------|------------|
| C | 6.13691700  | 1.43216300  | 1.18293900 |
| H | 6.73924700  | 0.65881200  | 1.67603300 |
| H | 6.72924300  | 1.84257000  | 0.35095200 |
| H | 5.96517400  | 2.24841800  | 1.89806800 |
| H | -2.42289200 | -3.01007100 | 1.83610700 |
| H | -4.12853000 | -2.53342000 | 1.67846000 |
| H | -3.01946500 | -1.51558200 | 2.61387100 |

**INT3r**

|   |             |             |             |
|---|-------------|-------------|-------------|
| S | -1.12327900 | -1.23744400 | 0.00051700  |
| N | -0.07562900 | 0.09128600  | 0.00011800  |
| O | -0.93920500 | -1.92591800 | 1.26788600  |
| O | -0.93910200 | -1.92695700 | -1.26627100 |
| C | -2.70375600 | -0.45019000 | 0.00012600  |
| C | -3.30815300 | -0.14841200 | -1.21711400 |
| H | -2.81069900 | -0.41842800 | -2.14956000 |
| C | -4.54704200 | 0.48453900  | -1.20633700 |
| H | -5.03401600 | 0.72918900  | -2.15241100 |
| C | -5.18245400 | 0.80972500  | -0.00049800 |
| C | -4.54709100 | 0.48558700  | 1.20569000  |
| H | -5.03413100 | 0.73106700  | 2.15152300  |
| C | -3.30823100 | -0.14733500 | 1.21709700  |
| H | -2.81082300 | -0.41653900 | 2.14980200  |
| C | 6.00974300  | 1.22614500  | -0.00007000 |
| C | 4.65485800  | 1.52294200  | 0.00005500  |
| C | 3.67504600  | 0.49557400  | -0.00011800 |
| C | 4.14482000  | -0.84477100 | -0.00042000 |
| C | 5.50316300  | -1.13063800 | -0.00054300 |
| C | 6.44744300  | -0.10142200 | -0.00037000 |
| H | 6.73742400  | 2.03940800  | 0.00007000  |
| H | 4.33922000  | 2.56632800  | 0.00029500  |
| H | 3.43879200  | -1.67553600 | -0.00056600 |
| H | 5.83135700  | -2.17131100 | -0.00077700 |
| H | 7.51351500  | -0.33111000 | -0.00046700 |
| C | 2.27710000  | 0.80978800  | 0.00000800  |
| C | 1.29576600  | -0.32944400 | -0.00012000 |
| H | 1.45934300  | -1.00032200 | 0.87389700  |
| H | 1.45907200  | -0.99990100 | -0.87451800 |
| C | 1.80436500  | 2.22697500  | 0.00025000  |
| H | 2.17716400  | 2.77175400  | -0.88366200 |
| H | 0.71080400  | 2.27832300  | 0.00017900  |
| H | 2.17701500  | 2.77140700  | 0.88444300  |

|   |             |            |             |
|---|-------------|------------|-------------|
| C | -6.53819400 | 1.46307400 | -0.00068500 |
| H | -6.68060400 | 2.08511100 | -0.89395300 |
| H | -7.33153300 | 0.69965500 | 0.00320900  |
| H | -6.67785600 | 2.09118700 | 0.88878000  |

**INT3s**

|   |             |             |             |
|---|-------------|-------------|-------------|
| S | 1.09469600  | -1.21741200 | -0.00089500 |
| N | 0.07887300  | 0.10702500  | -0.00128200 |
| O | 0.92384300  | -1.92886300 | -1.26244000 |
| O | 0.92272700  | -1.92934600 | 1.26023500  |
| C | 2.68550900  | -0.44318100 | -0.00002400 |
| C | 3.29367500  | -0.14727000 | 1.21615100  |
| H | 2.79240400  | -0.41452000 | 2.14737600  |
| C | 4.53855600  | 0.47465000  | 1.20655200  |
| H | 5.02794800  | 0.71421900  | 2.15285400  |
| C | 5.17724200  | 0.79468600  | 0.00132400  |
| C | 4.53889000  | 0.47655800  | -1.20462900 |
| H | 5.02856900  | 0.71763600  | -2.15040400 |
| C | 3.29405400  | -0.14534700 | -1.21558200 |
| H | 2.79309300  | -0.41115300 | -2.14738700 |
| C | -6.01671700 | 1.23536600  | 0.00095200  |
| C | -4.66070400 | 1.53318300  | 0.00026900  |
| C | -3.68135600 | 0.50883100  | -0.00010700 |
| C | -4.15174400 | -0.83148800 | 0.00022200  |
| C | -5.50740700 | -1.12015200 | 0.00088100  |
| C | -6.45308000 | -0.09061400 | 0.00126200  |
| H | -6.74356100 | 2.04899500  | 0.00124900  |
| H | -4.35525000 | 2.57829800  | 0.00006600  |
| H | -3.44454600 | -1.66128000 | -0.00008300 |
| H | -5.83356400 | -2.16119300 | 0.00109900  |
| H | -7.51891900 | -0.32119800 | 0.00179900  |
| C | -2.27449900 | 0.80487600  | -0.00075400 |
| C | -1.27831500 | -0.29632900 | -0.00085600 |
| H | -1.46250800 | -0.96781900 | -0.87181000 |
| H | -1.46227600 | -0.96844100 | 0.86958200  |
| C | -1.69328500 | 2.16704800  | -0.00158100 |
| H | -1.01770800 | 2.27256500  | 0.86595600  |
| H | -1.01834800 | 2.27180700  | -0.86970200 |
| H | -2.42703700 | 2.97710600  | -0.00169000 |
| C | 6.53957600  | 1.43520800  | 0.00192000  |
| H | 6.68746500  | 2.05644600  | 0.89500400  |
| H | 7.32657900  | 0.66521800  | -0.00152500 |

H 6.68547100 2.06225200 -0.88744600

**TS4**

S -1.17464300 1.36512000 0.76394700  
N -0.04161500 1.09724000 -0.36361300  
O -1.64089900 2.73488400 0.61472900  
O -0.72696100 0.88406200 2.07914800  
C -2.53582900 0.30563200 0.28933500  
C -2.74578700 -0.89747200 0.95211900  
H -2.10258100 -1.15970800 1.79342900  
C -3.79002700 -1.72736600 0.54071900  
H -3.96483600 -2.67204700 1.06050400  
C -4.62449000 -1.36410200 -0.51961700  
C -4.39485900 -0.13809000 -1.16345100  
H -5.04721200 0.16354600 -1.98656100  
C -3.36043100 0.69923100 -0.76499300  
H -3.18410800 1.66167100 -1.24796800  
C 5.81601200 -0.62285600 -0.84617400  
C 4.62554600 0.03812400 -1.12300200  
C 3.48314600 -0.17674700 -0.32741000  
C 3.56834800 -1.08194300 0.75066200  
C 4.75852400 -1.74210400 1.02279900  
C 5.88399800 -1.51213400 0.22728000  
H 6.69226600 -0.45089400 -1.47184300  
H 4.56652300 0.71285200 -1.97747100  
H 2.70130100 -1.25519400 1.38832400  
H 4.81476100 -2.43418200 1.86342300  
H 6.81862600 -2.03113600 0.44540500  
C 2.24312400 0.52031000 -0.62697200  
C 0.94323500 0.13543800 -0.02067700  
H 1.09045800 0.01717300 1.07553700  
H 0.71337400 -0.89230800 -0.38908200  
C 2.13327700 1.69752600 -1.41001500  
H 1.40976900 1.59783100 -2.23683700  
H 1.20410500 2.14589800 -0.76521700  
H 3.03586300 2.25476800 -1.66644700  
C -5.76004700 -2.25009800 -0.96024700  
H -5.76381000 -3.19902300 -0.40865300  
H -6.72905100 -1.75629100 -0.79355300  
H -5.68941300 -2.47720100 -2.03399600

**10a**

S 2.33285700 -1.39970200 0.39611300  
N 1.32685300 -2.13314600 -0.70260700  
O 3.66108600 -1.51724400 -0.17320100  
O 1.98087600 -1.92952200 1.69902700  
C 1.86588300 0.31615900 0.39417300  
C 0.84600300 0.74128800 1.24135500  
H 0.43432900 0.05256700 1.98105800  
C 0.36872200 2.04291600 1.11874400  
H -0.44120800 2.38093100 1.76897800  
C 0.90358400 2.92170300 0.16829600  
C 1.94844600 2.47161000 -0.65080900  
H 2.38479800 3.15225000 -1.38496600  
C 2.43537900 1.17235300 -0.54409000  
H 3.24691000 0.81252700 -1.17927300  
C -3.90870100 0.97301000 0.11679700  
C -2.65983000 0.69530800 -0.43070600  
C -2.18449200 -0.62334000 -0.50822900  
C -2.98982800 -1.65136200 0.00342600  
C -4.24138200 -1.37334400 0.55061400  
C -4.70655300 -0.06131500 0.60771700  
H -4.25794500 2.00538500 0.17149300  
H -2.02300200 1.51000400 -0.78111600  
H -2.64750200 -2.68672300 -0.03791500  
H -4.85571600 -2.18911800 0.93449400  
H -5.68376200 0.15651900 1.04080800  
C -0.84822700 -0.91260900 -1.09057700  
C -0.10479800 -2.10262800 -0.49749000  
H -0.53182700 -3.03576600 -0.90087200  
H -0.27312600 -2.15014300 0.58965700  
C -0.33626400 -0.17524600 -2.08142300  
H 0.66631700 -0.35841300 -2.47196200  
H 1.69063100 -2.10130800 -1.65042900  
H -0.90136500 0.64043500 -2.53490800  
C 0.38956600 4.33224200 0.05639400  
H 0.90432600 4.98882000 0.77474300  
H 0.55910300 4.74113900 -0.94822600  
H -0.68539000 4.38179300 0.27710500

**TS5**

S -1.14215900 -1.07018400 0.65056200  
N -0.05163300 0.02241200 -0.00105300  
O -1.01793300 -0.96174800 2.09828400

|            |             |             |             |                         |             |             |             |
|------------|-------------|-------------|-------------|-------------------------|-------------|-------------|-------------|
| O          | -0.97119300 | -2.35948400 | -0.00433000 | C                       | -2.78657600 | 1.23218000  | 0.13185400  |
| C          | -2.69098800 | -0.37848300 | 0.15383400  | C                       | -4.04177200 | 1.67409100  | -0.27109600 |
| C          | -3.27709000 | -0.81203600 | -1.03045000 | C                       | -4.81536200 | -0.60536100 | -0.43109300 |
| H          | -2.78626900 | -1.58415600 | -1.62431700 | H                       | -3.36031300 | -2.13408000 | 0.08439500  |
| C          | -4.49128800 | -0.25118900 | -1.41944000 | H                       | -1.98298400 | 1.93062400  | 0.36911300  |
| H          | -4.96361400 | -0.58123100 | -2.34670200 | H                       | -4.23033400 | 2.74552300  | -0.36389500 |
| C          | -5.11839800 | 0.72587900  | -0.63791600 | H                       | -5.60999500 | -1.32157800 | -0.64899100 |
| C          | -4.50289200 | 1.13348200  | 0.55473700  | C                       | -6.43365600 | 1.26027900  | -0.96181200 |
| H          | -4.98664400 | 1.89031900  | 1.17591500  | H                       | -6.36234200 | 2.17857200  | -1.55954200 |
| C          | -3.29173700 | 0.58562000  | 0.96054300  | H                       | -7.03743600 | 1.49080100  | -0.07047200 |
| H          | -2.81205900 | 0.88337600  | 1.89390700  | H                       | -6.97543800 | 0.50460500  | -1.54498700 |
| C          | 5.94847400  | 1.24991300  | -0.39308900 | N                       | -0.16173700 | -0.84354300 | -0.75419800 |
| C          | 4.61424000  | 1.46962900  | -0.07874600 | C                       | 3.35968800  | 2.21563700  | 0.42141400  |
| C          | 3.67149700  | 0.41106600  | -0.08973800 | C                       | 2.87281600  | 0.92144300  | 0.24278900  |
| C          | 4.15100700  | -0.87720600 | -0.44392400 | C                       | 3.70783400  | -0.09319600 | -0.24729200 |
| C          | 5.48692500  | -1.08909800 | -0.75019000 | C                       | 5.04654700  | 0.21913000  | -0.52807100 |
| C          | 6.39778400  | -0.02899900 | -0.72845600 | C                       | 5.53129300  | 1.51042500  | -0.34584100 |
| H          | 6.64751100  | 2.08762200  | -0.38095500 | C                       | 4.68728400  | 2.51652900  | 0.12612300  |
| H          | 4.28752800  | 2.48031100  | 0.16481400  | H                       | 2.69125100  | 2.99070100  | 0.79905000  |
| H          | 3.46907700  | -1.72829900 | -0.46553600 | H                       | 1.83004700  | 0.71292600  | 0.48856400  |
| H          | 5.82494500  | -2.09340700 | -1.01007600 | H                       | 5.72360800  | -0.56542500 | -0.86968500 |
| H          | 7.44658500  | -0.19871500 | -0.97432700 | H                       | 6.57761100  | 1.73068900  | -0.56323800 |
| C          | 2.29602700  | 0.63342800  | 0.25850600  | H                       | 5.06775700  | 3.52858200  | 0.27204900  |
| C          | 1.29224300  | -0.46020000 | 0.10122400  | C                       | 3.17857600  | -1.46883700 | -0.45983700 |
| H          | 1.42006400  | -1.21652300 | 0.90569900  | C                       | 3.70995200  | -2.30382900 | -1.38001600 |
| H          | 1.47791500  | -1.02489600 | -0.83645600 | H                       | 4.54149600  | -2.00300900 | -2.01853800 |
| C          | 1.78921100  | 1.93712300  | 0.77111800  | H                       | 3.30652400  | -3.30855500 | -1.51829900 |
| H          | 1.41388100  | 2.57711800  | -0.04715000 | C                       | 2.00520700  | -1.88615500 | 0.31452700  |
| H          | 0.92318900  | 1.75817100  | 1.42731000  | H                       | 0.98857000  | -1.37548600 | -0.29656600 |
| H          | 2.55587400  | 2.49601000  | 1.32170600  | H                       | 1.76097800  | -2.95293500 | 0.26957500  |
| C          | -6.44144000 | 1.31528900  | -1.04743400 | H                       | 1.89242100  | -1.45722000 | 1.31735100  |
| H          | -6.68206700 | 1.07261200  | -2.09014100 |                         |             |             |             |
| H          | -7.25131400 | 0.92377000  | -0.41333300 |                         |             |             |             |
| H          | -6.43708300 | 2.40854100  | -0.93706400 |                         |             |             |             |
|            |             |             |             | <b>INT5<sub>T</sub></b> |             |             |             |
|            |             |             |             | S                       | -0.72465700 | -0.58230900 | 0.31108100  |
|            |             |             |             | O                       | -0.19664300 | 0.14197600  | 1.46040900  |
|            |             |             |             | O                       | -0.63776500 | -2.03202500 | 0.22548300  |
|            |             |             |             | C                       | -2.41219500 | -0.10788000 | 0.08585900  |
|            |             |             |             | C                       | -5.06075400 | 0.65134000  | -0.29816700 |
|            |             |             |             | C                       | -3.28046900 | -0.98374300 | -0.55893000 |
|            |             |             |             | C                       | -2.83441800 | 1.13530900  | 0.55058600  |
|            |             |             |             | C                       | -4.15968200 | 1.50641800  | 0.35128900  |
|            |             |             |             | C                       | -4.60312300 | -0.59372000 | -0.74764700 |
| <b>TS6</b> |             |             |             |                         |             |             |             |
| S          | -0.96687900 | -0.71791000 | 0.72404100  |                         |             |             |             |
| O          | -0.29510900 | 0.33538100  | 1.47587400  |                         |             |             |             |
| O          | -1.09555400 | -2.06114100 | 1.26584100  |                         |             |             |             |
| C          | -2.56669700 | -0.13917900 | 0.24485900  |                         |             |             |             |
| C          | -5.07098500 | 0.76627300  | -0.55771300 |                         |             |             |             |
| C          | -3.56646400 | -1.06897700 | -0.02960800 |                         |             |             |             |

|   |             |             |             |
|---|-------------|-------------|-------------|
| H | -2.91740100 | -1.95598800 | -0.89463900 |
| H | -2.12959700 | 1.78883700  | 1.06621300  |
| H | -4.50516700 | 2.47861900  | 0.70857800  |
| H | -5.29588000 | -1.26991500 | -1.25242000 |
| C | -6.50009500 | 1.05259200  | -0.47745500 |
| H | -6.59420600 | 2.13522300  | -0.63459300 |
| H | -7.08448800 | 0.79561000  | 0.41952000  |
| H | -6.95535700 | 0.53477100  | -1.33145900 |
| N | 0.01573100  | 0.05913700  | -1.05041000 |
| C | 3.62140400  | 2.23892000  | 0.36028200  |
| C | 2.97722400  | 1.02108100  | 0.57523600  |
| C | 3.49035600  | -0.16059500 | 0.02071600  |
| C | 4.65687100  | -0.09411700 | -0.75249700 |
| C | 5.30079300  | 1.12304900  | -0.96190200 |
| C | 4.78453500  | 2.29380000  | -0.40597300 |
| H | 3.20651800  | 3.15141500  | 0.79131800  |
| H | 2.05202900  | 0.98207600  | 1.15622400  |
| H | 5.07047100  | -1.01199800 | -1.17513700 |
| H | 6.21422900  | 1.15729600  | -1.55786900 |
| H | 5.28848100  | 3.24727400  | -0.57112600 |
| C | 2.77875000  | -1.45848500 | 0.23153600  |
| C | 2.59661800  | -2.31539600 | -0.84536300 |
| H | 2.97132600  | -2.06426400 | -1.83870600 |
| H | 2.05651000  | -3.25428900 | -0.71792500 |
| C | 2.26144700  | -1.75090300 | 1.49333500  |
| H | 0.98579100  | -0.30248200 | -0.99218400 |
| H | 1.67215900  | -2.65421200 | 1.65032800  |
| H | 2.42067600  | -1.08061200 | 2.33688900  |

**Styrene**

|   |             |             |             |
|---|-------------|-------------|-------------|
| C | 1.35341600  | 1.33018200  | 0.00003500  |
| C | -0.01560400 | 1.08741300  | -0.00001300 |
| C | -0.51215200 | -0.22583000 | -0.00003300 |
| C | 0.40865800  | -1.28247200 | -0.00001100 |
| C | 1.78134400  | -1.04184000 | 0.00003800  |
| C | 2.25902200  | 0.26667100  | 0.00006200  |
| H | 1.71964400  | 2.35804800  | 0.00004900  |
| H | -0.70832500 | 1.93032300  | -0.00004200 |
| H | 0.03708900  | -2.30967500 | -0.00003000 |
| H | 2.47951900  | -1.88029300 | 0.00005600  |
| H | 3.33260600  | 0.46043100  | 0.00009900  |
| C | -1.95496500 | -0.53550000 | -0.00007700 |

|   |             |             |             |
|---|-------------|-------------|-------------|
| H | -2.19338500 | -1.60396300 | -0.00017500 |
| C | -2.96400100 | 0.33960900  | -0.00000400 |
| H | -2.80223600 | 1.41957800  | 0.00010500  |
| H | -3.99921300 | -0.00384500 | -0.00004800 |

**TS7**

|   |             |             |             |
|---|-------------|-------------|-------------|
| S | -0.74234700 | -1.04968300 | 0.59925800  |
| N | 0.09790300  | -0.90239400 | -0.86192400 |
| O | -0.03452000 | -0.26379800 | 1.60522400  |
| O | -1.01798000 | -2.46198700 | 0.81427600  |
| C | -2.26209900 | -0.22477300 | 0.21874800  |
| C | -3.32593900 | -0.96939800 | -0.28468700 |
| H | -3.21996000 | -2.04842400 | -0.40503200 |
| C | -4.50800300 | -0.31008100 | -0.60750300 |
| H | -5.35149400 | -0.88058400 | -1.00127900 |
| C | -4.63460600 | 1.07415800  | -0.43300600 |
| C | -3.54400500 | 1.79259000  | 0.07705400  |
| H | -3.63207900 | 2.87158100  | 0.21951800  |
| C | -2.35433300 | 1.15307200  | 0.40702400  |
| H | -1.50448200 | 1.70092600  | 0.81635300  |
| C | 5.43861400  | 1.29949400  | -0.76284300 |
| C | 4.73267000  | 0.17539300  | -1.17794700 |
| C | 3.57437600  | -0.23930200 | -0.49735300 |
| C | 3.12040100  | 0.52320200  | 0.59653300  |
| C | 3.82652000  | 1.64949100  | 1.00335000  |
| C | 4.98860500  | 2.03807500  | 0.33214300  |
| H | 6.34049000  | 1.60388900  | -1.29580600 |
| H | 5.08079400  | -0.40283900 | -2.03666300 |
| H | 2.19266400  | 0.25154100  | 1.10536200  |
| H | 3.46215500  | 2.23587800  | 1.84803000  |
| H | 5.53791600  | 2.92288100  | 0.65743600  |
| C | 2.86713700  | -1.42994500 | -0.94980500 |
| C | 1.87722900  | -2.06831900 | -0.25711800 |
| H | 1.71917300  | -1.85817000 | 0.80247000  |
| H | 1.43496600  | -2.98683200 | -0.64340100 |
| C | -5.92668500 | 1.77511000  | -0.75506900 |
| H | -6.50727100 | 1.21876100  | -1.50213700 |
| H | -6.54788300 | 1.86872600  | 0.14913100  |
| H | -5.74465400 | 2.78824900  | -1.13739400 |
| H | 3.13259700  | -1.80020800 | -1.94438400 |

**INT6T**



|              |             |             |             |            |             |             |             |
|--------------|-------------|-------------|-------------|------------|-------------|-------------|-------------|
| S            | -1.04796200 | -1.19107500 | 0.00018900  | H          | -2.71818600 | -0.32938300 | 2.14952600  |
| N            | 0.03445800  | 0.11074100  | -0.00075700 | C          | -4.44377300 | 0.59371300  | 1.20596700  |
| O            | -0.88054700 | -1.88577200 | -1.26639600 | H          | -4.92767500 | 0.84489100  | 2.15191200  |
| O            | -0.87997700 | -1.88454900 | 1.26736700  | C          | -5.07530200 | 0.92570700  | 0.00002300  |
| C            | -2.60914000 | -0.36665400 | 0.00015000  | C          | -4.44386800 | 0.59328200  | -1.20596500 |
| C            | -3.20689500 | -0.05127800 | 1.21715700  | H          | -4.92790700 | 0.84415300  | -2.15193800 |
| H            | -2.71552400 | -0.33165400 | 2.14976700  | C          | -3.21270200 | -0.05442900 | -1.21692700 |
| C            | -4.43172200 | 0.60846300  | 1.20608200  | H          | -2.71843000 | -0.33007300 | -2.14941100 |
| H            | -4.91330000 | 0.86405000  | 2.15202000  | C          | 5.74131100  | -0.80945000 | -0.00030100 |
| C            | -5.05981900 | 0.94687000  | 0.00010600  | C          | 4.36183200  | -0.66063700 | -0.00017300 |
| C            | -4.43144800 | 0.60875100  | -1.20593300 | C          | 3.76938400  | 0.62978600  | 0.00001500  |
| H            | -4.91288600 | 0.86460200  | -2.15188700 | C          | 4.63835500  | 1.75238800  | 0.00006800  |
| C            | -3.20671100 | -0.05094600 | -1.21696700 | C          | 6.01444700  | 1.59219600  | -0.00006400 |
| H            | -2.71519800 | -0.33112300 | -2.14956400 | C          | 6.57758900  | 0.31088100  | -0.00025000 |
| C            | 5.75027200  | -0.78600500 | -0.00028000 | H          | 6.17417800  | -1.81106800 | -0.00043900 |
| C            | 4.36854800  | -0.65552900 | -0.00042100 | H          | 3.72980900  | -1.55039300 | -0.00020700 |
| C            | 3.75929600  | 0.62698800  | -0.00012200 | H          | 4.20226500  | 2.75342300  | 0.00021500  |
| C            | 4.61304800  | 1.76161000  | 0.00032700  | H          | 6.66113900  | 2.47105000  | -0.00002000 |
| C            | 5.99073600  | 1.61955000  | 0.00046700  | H          | 7.66105400  | 0.18691800  | -0.00035100 |
| C            | 6.57092800  | 0.34532100  | 0.00016500  | C          | 2.36312500  | 0.81945800  | 0.00018300  |
| H            | 6.19672100  | -1.78164600 | -0.00051000 | H          | 1.95606400  | 1.83198000  | 0.00043900  |
| H            | 3.74774900  | -1.55310900 | -0.00075800 | C          | 1.38752500  | -0.30363900 | 0.00022400  |
| H            | 4.16335900  | 2.75661300  | 0.00056400  | H          | 1.53993300  | -0.97337100 | -0.87524200 |
| H            | 6.62606700  | 2.50666600  | 0.00081700  | H          | 1.53951200  | -0.97289900 | 0.87613100  |
| H            | 7.65599700  | 0.23605700  | 0.00027900  | C          | -6.42314300 | 1.59531400  | -0.00039400 |
| C            | 2.35080800  | 0.79246900  | -0.00025000 | H          | -6.56052900 | 2.21492100  | 0.89533800  |
| H            | 1.92134600  | 1.79526700  | 0.00007600  | H          | -7.22570100 | 0.84165200  | -0.01019800 |
| C            | 1.39719500  | -0.35135100 | -0.00065100 | H          | -6.55265400 | 2.22927500  | -0.88727900 |
| H            | 1.55016000  | -1.02220900 | -0.87680300 |            |             |             |             |
| H            | 1.55008700  | -1.02278200 | 0.87505600  | <b>TS8</b> |             |             |             |
| C            | -6.40113700 | 1.62937100  | -0.00029200 | S          | -1.11346000 | 1.34226700  | -0.24348300 |
| H            | -6.53243100 | 2.25049800  | 0.89529500  | N          | 0.10948100  | 0.18613400  | -0.13125400 |
| H            | -7.21078800 | 0.88333500  | -0.00970000 | O          | -0.98053300 | 2.23482900  | 0.89836300  |
| H            | -6.52474400 | 2.26422600  | -0.88736700 | O          | -1.08476300 | 1.86559800  | -1.60139800 |
|              |             |             |             | C          | -2.56611600 | 0.35877600  | -0.03684900 |
| <b>INT6s</b> |             |             |             | C          | -3.15033200 | -0.22810600 | -1.15697800 |
| S            | -1.04200000 | -1.17231000 | 0.00014000  | H          | -2.71808000 | -0.05731000 | -2.14381000 |
| N            | 0.02313800  | 0.14091200  | -0.00024700 | C          | -4.28538100 | -1.01158700 | -0.98243100 |
| O            | -0.86916200 | -1.86776400 | -1.26582500 | H          | -4.75491700 | -1.47944900 | -1.85025300 |
| O            | -0.86902200 | -1.86730000 | 1.26634000  | C          | -4.84073900 | -1.20762900 | 0.29016900  |
| C            | -2.61180700 | -0.36385200 | 0.00008600  | C          | -4.23112600 | -0.59694100 | 1.39271000  |
| C            | -3.21253200 | -0.05405100 | 1.21699000  | H          | -4.65654600 | -0.73908500 | 2.38803200  |

|   |             |             |             |
|---|-------------|-------------|-------------|
| C | -3.09349800 | 0.19108700  | 1.23936900  |
| H | -2.61774000 | 0.68204100  | 2.08927400  |
| C | 5.51943200  | -0.01565200 | 1.34351700  |
| C | 4.22734400  | 0.24350200  | 0.91056500  |
| C | 3.71607500  | -0.36742000 | -0.26443000 |
| C | 4.57390200  | -1.25659000 | -0.96573700 |
| C | 5.86131500  | -1.51174700 | -0.52321900 |
| C | 6.34580300  | -0.89242800 | 0.63428100  |
| H | 5.88952400  | 0.46777400  | 2.24892500  |
| H | 3.60225100  | 0.92546900  | 1.48821800  |
| H | 4.19979700  | -1.73982000 | -1.87054500 |
| H | 6.49886200  | -2.19920900 | -1.08118900 |
| H | 7.35931200  | -1.09411800 | 0.98270300  |
| C | 2.41281600  | -0.11862300 | -0.77006200 |
| H | 2.09988800  | -0.64756100 | -1.67228100 |
| C | 1.40997100  | 0.80978700  | -0.18551000 |
| H | 1.66361900  | 1.10943700  | 0.84852300  |
| H | 1.38182500  | 1.75736600  | -0.76363800 |
| C | -6.08694400 | -2.03501900 | 0.45631800  |
| H | -6.06209300 | -2.92255700 | -0.19033700 |
| H | -6.97706400 | -1.44955100 | 0.17934100  |
| H | -6.21239900 | -2.36451200 | 1.49554800  |

**22a**

|   |             |             |             |
|---|-------------|-------------|-------------|
| S | -0.93678000 | 1.98532800  | 0.01826600  |
| N | 0.59725100  | 1.49006400  | 0.54678600  |
| O | -1.48181800 | 2.80245700  | 1.08091100  |
| O | -0.83405400 | 2.50795400  | -1.33931100 |
| C | -1.76953600 | 0.42634200  | -0.03142900 |
| C | -1.96323700 | -0.20731300 | -1.25313700 |
| H | -1.62413900 | 0.27460500  | -2.17110000 |
| C | -2.60548300 | -1.44467500 | -1.26951500 |
| H | -2.76599100 | -1.95445800 | -2.22130700 |
| C | -3.05040200 | -2.04159100 | -0.08595400 |
| C | -2.84614800 | -1.36852900 | 1.12917400  |
| H | -3.19724500 | -1.82261100 | 2.05829200  |
| C | -2.21107800 | -0.13443400 | 1.16703600  |
| H | -2.05835200 | 0.40339600  | 2.10391300  |
| C | 3.30413300  | -1.73424200 | 1.33475700  |
| C | 2.46810200  | -0.64765400 | 1.08641300  |
| C | 2.42806300  | -0.06967400 | -0.18602900 |
| C | 3.22495700  | -0.59818300 | -1.20564900 |

|   |             |             |             |
|---|-------------|-------------|-------------|
| C | 4.06109000  | -1.68443100 | -0.95528700 |
| C | 4.10381300  | -2.25404300 | 0.31678600  |
| H | 3.32769200  | -2.18207800 | 2.32949200  |
| H | 1.82535400  | -0.24266400 | 1.86996000  |
| H | 3.18844900  | -0.15442000 | -2.20308700 |
| H | 4.67938500  | -2.08952400 | -1.75779300 |
| H | 4.75641100  | -3.10587400 | 0.51348200  |
| C | 1.56504700  | 1.11334900  | -0.47013700 |
| H | 1.23427100  | 1.22823000  | -1.50855600 |
| C | 1.68823100  | 2.40636900  | 0.26524500  |
| H | 2.41639300  | 2.50459600  | 1.07353000  |
| H | 1.44976700  | 3.31261700  | -0.30004000 |
| C | -3.74770300 | -3.37519400 | -0.10042100 |
| H | -3.77508700 | -3.80214600 | -1.11065200 |
| H | -4.78301500 | -3.27595400 | 0.25774100  |
| H | -3.23828700 | -4.08927300 | 0.56245100  |

**TS9**

|   |             |             |             |
|---|-------------|-------------|-------------|
| S | -2.59443500 | 0.22645700  | -0.24186100 |
| N | -2.35847200 | -1.20447200 | -0.86680600 |
| O | -3.04608700 | 0.24755700  | 1.16604800  |
| O | -3.37511600 | 1.02417400  | -1.20456700 |
| C | -0.98063900 | 1.06521000  | -0.16168200 |
| C | -0.11868900 | 0.96678500  | -1.25378300 |
| H | -0.45017300 | 0.40047900  | -2.12699200 |
| C | 1.14946500  | 1.53315200  | -1.19071900 |
| H | 1.83377800  | 1.43008500  | -2.03782900 |
| C | 1.58314800  | 2.20141000  | -0.03703700 |
| C | 0.70092600  | 2.30507200  | 1.04150400  |
| H | 1.02524200  | 2.82294800  | 1.94896800  |
| C | -0.57666200 | 1.74252100  | 0.98287900  |
| H | -1.27033800 | 1.79161100  | 1.82417900  |
| C | 3.14718200  | -1.02997900 | 0.68554100  |
| C | 1.89668900  | -1.11962700 | 1.29116900  |
| C | 0.79690900  | -1.67759600 | 0.61507300  |
| C | 0.99193500  | -2.11227300 | -0.71192300 |
| C | 2.24219200  | -2.02355000 | -1.31381700 |
| C | 3.33053000  | -1.48602900 | -0.62079300 |
| H | 3.98514800  | -0.59446300 | 1.23533200  |
| H | 1.75226400  | -0.74349300 | 2.30684500  |
| H | 0.12445900  | -2.45242700 | -1.28110900 |
| H | 2.36596700  | -2.35437000 | -2.34759100 |

|   |             |             |             |
|---|-------------|-------------|-------------|
| H | 4.30858000  | -1.41055700 | -1.10036200 |
| C | -0.51501700 | -1.73242100 | 1.25081400  |
| C | -1.58443900 | -2.41427000 | 0.75558400  |
| H | -2.53887500 | -2.37003800 | 1.27735200  |
| H | -1.46132600 | -3.19432800 | 0.00517000  |
| C | 2.98815000  | 2.73969200  | 0.04339300  |
| H | 3.24382100  | 3.33189800  | -0.84818900 |
| H | 3.12360200  | 3.37632300  | 0.92900400  |
| H | 3.71247500  | 1.91126700  | 0.10577100  |
| H | -0.67482900 | -1.05937200 | 2.09781300  |

**INT7**

|   |             |             |             |
|---|-------------|-------------|-------------|
| S | -2.54777300 | 0.15204200  | -0.30938500 |
| N | -2.14130600 | -1.36311900 | -0.29006200 |
| O | -3.28605000 | 0.60200900  | 0.89134300  |
| O | -3.10849100 | 0.50190500  | -1.61795900 |
| C | -0.99112900 | 1.09033000  | -0.22008100 |
| C | -0.12032000 | 1.05141600  | -1.30942100 |
| H | -0.46090600 | 0.57586900  | -2.23175500 |
| C | 1.15917500  | 1.58401000  | -1.19409700 |
| H | 1.84982100  | 1.52858500  | -2.04052000 |
| C | 1.59267500  | 2.16465100  | 0.00620400  |
| C | 0.69565500  | 2.22669900  | 1.07613100  |
| H | 1.01538300  | 2.68809000  | 2.01520300  |
| C | -0.59012400 | 1.69237700  | 0.96747200  |
| H | -1.29952500 | 1.71448400  | 1.79709000  |
| C | 3.21620700  | -1.16517800 | 0.49196000  |
| C | 2.04897000  | -1.13419200 | 1.24143000  |
| C | 0.80881700  | -1.56253800 | 0.69856000  |
| C | 0.80710100  | -2.02008200 | -0.64858600 |
| C | 1.98261700  | -2.05048700 | -1.38529700 |
| C | 3.19465100  | -1.62323800 | -0.83022900 |
| H | 4.15519100  | -0.82729500 | 0.93757100  |
| H | 2.06838100  | -0.76188100 | 2.26893800  |
| H | -0.15301800 | -2.28640400 | -1.09383900 |
| H | 1.95472400  | -2.39778100 | -2.42077900 |
| H | 4.11190300  | -1.64374100 | -1.42201300 |
| C | -0.37528000 | -1.51448600 | 1.48635600  |
| C | -1.76171700 | -1.87920200 | 1.00806700  |
| H | -2.47566600 | -1.58487800 | 1.80062200  |
| H | -1.81490700 | -2.98627700 | 0.94395900  |
| C | 3.00948300  | 2.65804800  | 0.14250900  |

|   |             |             |             |
|---|-------------|-------------|-------------|
| H | 3.31893400  | 3.24344400  | -0.73618300 |
| H | 3.13151500  | 3.28672500  | 1.03583600  |
| H | 3.70262600  | 1.80526200  | 0.23029300  |
| H | -0.25530800 | -1.18512400 | 2.52322500  |

**INT8**

|   |             |             |             |
|---|-------------|-------------|-------------|
| S | -0.16419200 | -1.80299700 | -0.38729400 |
| N | 0.34227000  | -1.89646800 | 1.12973300  |
| O | -0.76555900 | -3.07626100 | -0.74854300 |
| O | 0.85077000  | -1.25860200 | -1.30914300 |
| C | -1.47637400 | -0.57191000 | -0.36822900 |
| C | -1.25359000 | 0.70727500  | -0.86847100 |
| H | -0.29974400 | 0.92108900  | -1.35543300 |
| C | -2.26230500 | 1.66939600  | -0.76204700 |
| H | -2.09757100 | 2.67285600  | -1.16149600 |
| C | -3.48690500 | 1.36332500  | -0.16371800 |
| C | -3.68897100 | 0.06075800  | 0.32423800  |
| H | -4.64766100 | -0.19385900 | 0.78263800  |
| C | -2.69686100 | -0.90661800 | 0.22153200  |
| H | -2.84874100 | -1.92501200 | 0.58561100  |
| C | 4.03625100  | -0.09249500 | -0.37446500 |
| C | 2.82722700  | -0.36346100 | 0.25011900  |
| C | 1.99941300  | 0.71693400  | 0.67048500  |
| C | 2.39314900  | 2.05421500  | 0.37191300  |
| C | 3.57832200  | 2.30464500  | -0.28584600 |
| C | 4.39953200  | 1.22525500  | -0.65491500 |
| H | 4.68056300  | -0.91479000 | -0.68458100 |
| H | 2.49038700  | -1.38329700 | 0.42544100  |
| H | 1.74557800  | 2.87680500  | 0.68319200  |
| H | 3.87958300  | 3.32621000  | -0.51718400 |
| H | 5.33481500  | 1.42307700  | -1.18230300 |
| C | 0.85795500  | 0.52945500  | 1.46656100  |
| H | 0.34107200  | 1.44704100  | 1.77531800  |
| C | 0.28126100  | -0.74360700 | 1.95141200  |
| H | -0.74837000 | -0.50177000 | 2.29771000  |
| H | 0.82016200  | -0.94837000 | 2.90573500  |
| C | -4.58543600 | 2.38816700  | -0.06135000 |
| H | -4.23086200 | 3.38578400  | -0.35068800 |
| H | -5.42589600 | 2.12369500  | -0.72057900 |
| H | -4.97982700 | 2.44467300  | 0.96335500  |

**TS10**

|   |             |             |             |   |             |             |             |
|---|-------------|-------------|-------------|---|-------------|-------------|-------------|
| S | 2.55446500  | 0.03149900  | 0.33885500  | H | -2.92978300 | -0.54917700 | -2.14061800 |
| N | 2.03203000  | -1.45472900 | 0.05857000  | C | -4.62647400 | 0.39540300  | -1.16556900 |
| O | 3.34581100  | 0.57018600  | -0.77617500 | H | -5.13500200 | 0.63473800  | -2.10176600 |
| O | 3.07194500  | 0.09492500  | 1.69624100  | C | -5.22434500 | 0.74764400  | 0.05198500  |
| C | 1.04566900  | 1.03611500  | 0.32274300  | C | -4.56203700 | 0.42992900  | 1.24477700  |
| C | 0.14282900  | 0.91584700  | 1.37937300  | H | -5.01975900 | 0.69599300  | 2.19971100  |
| H | 0.44573500  | 0.36354200  | 2.27184900  | C | -3.33285200 | -0.22272900 | 1.23162300  |
| C | -1.12427900 | 1.47514600  | 1.26072900  | H | -2.81391800 | -0.48774200 | 2.15377200  |
| H | -1.84348700 | 1.36735500  | 2.07751600  | C | 5.94836700  | 1.02200000  | -0.03044700 |
| C | -1.50406300 | 2.18248500  | 0.10416100  | C | 4.60003800  | 1.30489000  | -0.20237900 |
| C | -0.56895400 | 2.32618500  | -0.92261500 | C | 3.61928600  | 0.28285300  | -0.13891400 |
| H | -0.83634500 | 2.89737000  | -1.81535400 | C | 4.07809000  | -1.03724000 | 0.11239100  |
| C | 0.70375700  | 1.75347100  | -0.82016200 | C | 5.42715100  | -1.31128300 | 0.27784100  |
| H | 1.45088400  | 1.86028100  | -1.61032200 | C | 6.37489200  | -0.28590200 | 0.20808300  |
| C | -1.99894200 | -2.30947200 | 1.17996800  | H | 6.67690900  | 1.83268300  | -0.08041200 |
| C | -0.82503700 | -2.05095700 | 0.49571300  | H | 4.29514500  | 2.33684400  | -0.37501300 |
| C | -0.87297300 | -1.32253400 | -0.72681800 | H | 3.36798300  | -1.86294600 | 0.16891400  |
| C | -2.11420000 | -0.81020400 | -1.18585600 | H | 5.74688900  | -2.33778300 | 0.46343100  |
| C | -3.28166400 | -1.06756700 | -0.48408600 | H | 7.43479500  | -0.50528900 | 0.34100300  |
| C | -3.21954900 | -1.82151200 | 0.69166200  | C | 2.22421200  | 0.57620300  | -0.31770500 |
| H | -1.97276300 | -2.87372700 | 2.11233900  | C | 1.20853300  | -0.48925300 | -0.09101900 |
| H | 0.15983700  | -2.34503900 | 0.86959700  | H | 1.39743100  | -1.01396800 | 0.87231500  |
| H | -2.13813000 | -0.22209900 | -2.10574000 | H | 1.34633000  | -1.29820600 | -0.84649400 |
| H | -4.23741800 | -0.68522600 | -0.84276800 | C | 1.71334500  | 1.93771800  | -0.64977200 |
| H | -4.13725500 | -2.02061100 | 1.24875100  | H | 0.81561600  | 1.81804700  | -1.27715400 |
| C | 0.26194200  | -1.13924000 | -1.54571700 | H | 2.45334000  | 2.50363900  | -1.23141800 |
| H | 0.07939500  | -0.55737600 | -2.45873100 | C | -6.56943500 | 1.42281900  | 0.07683700  |
| C | 1.63754400  | -1.66153400 | -1.30578200 | H | -6.70703500 | 2.06851000  | -0.80050900 |
| H | 2.32068600  | -1.21481900 | -2.05180300 | H | -7.37582300 | 0.67325600  | 0.06704300  |
| H | 1.60403400  | -2.74952800 | -1.53060800 | H | -6.69309900 | 2.03209400  | 0.98159900  |
| C | -2.88189400 | 2.78088300  | 0.00420600  | C | 1.31461000  | 2.71963700  | 0.61240600  |
| H | -3.65478100 | 2.02866800  | 0.22456500  | H | 0.54531700  | 2.16916500  | 1.17137400  |
| H | -3.00838200 | 3.59755900  | 0.73067000  | H | 2.18348500  | 2.86910000  | 1.26950900  |
| H | -3.07083300 | 3.18921900  | -0.99726600 | H | 0.90460000  | 3.70374100  | 0.34618000  |

**INT9**

|   |             |             |             |
|---|-------------|-------------|-------------|
| S | -1.19513700 | -1.36365100 | -0.02631600 |
| N | -0.14516900 | -0.05902100 | -0.10142900 |
| O | -0.99075800 | -2.03721900 | 1.24923800  |
| O | -1.07559200 | -2.10636400 | -1.27412900 |
| C | -2.76556000 | -0.55218800 | 0.00445400  |
| C | -3.39852700 | -0.25757800 | -1.19980500 |

**TS11**

|   |             |             |             |
|---|-------------|-------------|-------------|
| S | -0.53754900 | -0.42664400 | 0.32745600  |
| N | -0.16417900 | 1.09669400  | 0.71401700  |
| O | -0.30055500 | -1.34364400 | 1.45759800  |
| O | 0.08262000  | -0.84435400 | -0.94615200 |
| C | -2.28941400 | -0.31250600 | 0.04599600  |
| C | -2.80999000 | -0.74815200 | -1.16455100 |

|   |             |             |             |
|---|-------------|-------------|-------------|
| H | -2.12632000 | -1.10814500 | -1.93440500 |
| C | -4.19154100 | -0.70734000 | -1.36028400 |
| H | -4.61134800 | -1.04501200 | -2.31026300 |
| C | -5.04703600 | -0.24046500 | -0.35953700 |
| C | -4.48939300 | 0.19234700  | 0.85444000  |
| H | -5.14816800 | 0.56231000  | 1.64366600  |
| C | -3.11747700 | 0.15786000  | 1.06504400  |
| H | -2.67329100 | 0.49962500  | 2.00084900  |
| C | 5.25931900  | -0.56573000 | -0.87597800 |
| C | 4.30859600  | 0.42493500  | -0.67477300 |
| C | 3.13418500  | 0.14724500  | 0.05398800  |
| C | 2.91625600  | -1.15327500 | 0.55685500  |
| C | 3.85992500  | -2.14545500 | 0.32129000  |
| C | 5.03007100  | -1.85247800 | -0.38168200 |
| H | 6.17722100  | -0.34143300 | -1.41992200 |
| H | 4.48160900  | 1.43401300  | -1.05202200 |
| H | 1.98376400  | -1.40108800 | 1.07062100  |
| H | 3.67782600  | -3.15676600 | 0.68510600  |
| H | 5.77110000  | -2.63582100 | -0.55012200 |
| C | 2.15700000  | 1.19649500  | 0.26576600  |
| C | 1.13982500  | 1.15091100  | 1.38460500  |
| H | 1.20500400  | 2.08679700  | 1.96326900  |
| H | 1.32426500  | 0.31803600  | 2.07802400  |
| C | 1.85956100  | 2.17567800  | -0.71101200 |
| H | 0.77413800  | 1.57223600  | -0.67731800 |
| H | 2.39614300  | 2.07727200  | -1.65853200 |
| C | -6.53889800 | -0.20155300 | -0.56210300 |
| H | -6.81192900 | -0.50423000 | -1.58110900 |
| H | -7.04639400 | -0.87810900 | 0.14167300  |
| H | -6.93390000 | 0.80965300  | -0.38633400 |
| C | 1.37136800  | 3.57692000  | -0.36775900 |
| H | 0.58846600  | 3.54441300  | 0.39889800  |
| H | 2.20687100  | 4.20180400  | -0.02010600 |
| H | 0.94431500  | 4.04525000  | -1.26279000 |

**TS12**

|   |             |             |             |
|---|-------------|-------------|-------------|
| S | -0.59506100 | -0.47795000 | 0.24564600  |
| N | -0.26631100 | 0.65332000  | 1.34716400  |
| O | -0.36644400 | -1.83700900 | 0.76894100  |
| O | 0.07703300  | -0.20277100 | -1.04475300 |
| C | -2.33874600 | -0.24606600 | -0.00312100 |
| C | -2.81783800 | -0.05004600 | -1.29097800 |

|   |             |             |             |
|---|-------------|-------------|-------------|
| H | -2.10714200 | 0.00610400  | -2.11651100 |
| C | -4.19409600 | 0.07376600  | -1.48825000 |
| H | -4.58189900 | 0.23053600  | -2.49707400 |
| C | -5.08474900 | 0.00105400  | -0.41445600 |
| C | -4.56832900 | -0.19906300 | 0.87590300  |
| H | -5.25500600 | -0.25486800 | 1.72387200  |
| C | -3.20219200 | -0.32611300 | 1.08930500  |
| H | -2.78932100 | -0.47324700 | 2.08810400  |
| C | 5.26807400  | -0.15431000 | -0.74047300 |
| C | 4.28004200  | 0.66164800  | -0.20678900 |
| C | 3.06754300  | 0.10528700  | 0.24992600  |
| C | 2.85050200  | -1.28573800 | 0.13272800  |
| C | 3.82915000  | -2.08530500 | -0.44318200 |
| C | 5.03676900  | -1.52614900 | -0.86699100 |
| H | 6.21526500  | 0.27577800  | -1.06691000 |
| H | 4.45390600  | 1.73242000  | -0.10292200 |
| H | 1.89347000  | -1.72235600 | 0.43118600  |
| H | 3.64823600  | -3.15368000 | -0.56220100 |
| H | 5.80579100  | -2.16555200 | -1.30397900 |
| C | 2.06329100  | 0.95692700  | 0.84777300  |
| C | 1.07888600  | 0.43419400  | 1.88172300  |
| H | 1.18912400  | 1.04099900  | 2.79602100  |
| H | 1.29552000  | -0.61133200 | 2.14858100  |
| C | 1.70434100  | 2.25683700  | 0.40005500  |
| H | 0.56983100  | 1.81548300  | 0.34105300  |
| H | 1.43321400  | 2.93256400  | 1.22675100  |
| C | -6.57087600 | 0.13014100  | -0.62168600 |
| H | -6.81242300 | 0.32225500  | -1.67489600 |
| H | -7.08991800 | -0.79005700 | -0.31486300 |
| H | -6.98164400 | 0.95378300  | -0.01954600 |
| C | 2.22730200  | 2.91622900  | -0.85249000 |
| H | 3.16562500  | 3.46428200  | -0.68627100 |
| H | 2.38653900  | 2.16887700  | -1.64152500 |
| H | 1.48681600  | 3.64044700  | -1.21684200 |

**TS13**

|   |             |             |             |
|---|-------------|-------------|-------------|
| S | -1.39857700 | -1.82874500 | 0.37660200  |
| N | -0.17998400 | -1.37636600 | -0.64274100 |
| O | -0.89272300 | -1.92960700 | 1.74784200  |
| O | -2.08323400 | -2.94615400 | -0.23991300 |
| C | -2.48691000 | -0.41913600 | 0.31785900  |
| C | -3.29065800 | -0.23723600 | -0.80874600 |

|             |             |             |             |   |             |             |             |
|-------------|-------------|-------------|-------------|---|-------------|-------------|-------------|
| H           | -3.26583400 | -0.97667800 | -1.61085900 | O | 1.46406100  | -0.85221900 | 2.80442900  |
| C           | -4.11354000 | 0.87973300  | -0.87289500 | C | 2.43746600  | -0.25967000 | 0.44884600  |
| H           | -4.74770600 | 1.03252100  | -1.74917100 | C | 2.79080100  | 1.02094200  | 0.87602500  |
| C           | -4.15126500 | 1.81421500  | 0.17428900  | H | 2.37239100  | 1.41046000  | 1.80544600  |
| C           | -3.34305100 | 1.59806100  | 1.29403500  | C | 3.68341100  | 1.76099800  | 0.11155500  |
| H           | -3.37072300 | 2.31064400  | 2.12099900  | H | 3.96994000  | 2.76358000  | 0.43730200  |
| C           | -2.50859900 | 0.48284900  | 1.37519500  | C | 4.23318200  | 1.23892100  | -1.06990700 |
| H           | -1.89010000 | 0.29402900  | 2.25384100  | C | 3.86979800  | -0.05211400 | -1.46410600 |
| C           | 5.22456000  | 1.54299500  | -0.15299300 | H | 4.30160200  | -0.47671800 | -2.37273200 |
| C           | 4.12056300  | 0.97412400  | -0.78287200 | C | 2.97399600  | -0.80985600 | -0.70958900 |
| C           | 3.21953200  | 0.16758100  | -0.06674400 | H | 2.70416800  | -1.82747000 | -0.99573800 |
| C           | 3.47852500  | -0.07223100 | 1.29571900  | C | -5.11209600 | 1.33604300  | 0.01551600  |
| C           | 4.58598500  | 0.49085300  | 1.91879600  | C | -4.33563800 | 0.24294400  | -0.34689500 |
| C           | 5.46246700  | 1.30482400  | 1.19908200  | C | -2.94918500 | 0.21313800  | -0.08592300 |
| H           | 5.90355700  | 2.17633500  | -0.72547400 | C | -2.37266300 | 1.33185900  | 0.54956500  |
| H           | 3.94376300  | 1.17980800  | -1.83927600 | C | -3.15653400 | 2.42763700  | 0.90243900  |
| H           | 2.82494800  | -0.73109000 | 1.86981500  | C | -4.52510300 | 2.43578100  | 0.64354800  |
| H           | 4.77286800  | 0.28327600  | 2.97324200  | H | -6.18267900 | 1.33018300  | -0.19347400 |
| H           | 6.33170200  | 1.74419300  | 1.69000300  | H | -4.82003200 | -0.59923500 | -0.84050200 |
| C           | 2.03848300  | -0.38965700 | -0.74374100 | H | -1.30818200 | 1.32859200  | 0.77110900  |
| C           | 0.90063400  | -0.72794300 | -0.01028600 | H | -2.68770900 | 3.28297900  | 1.39083700  |
| H           | 0.83449100  | -0.49462000 | 1.05916200  | H | -5.13469600 | 3.29438300  | 0.92901000  |
| H           | 1.19849800  | -1.87338000 | -0.22008700 | C | -2.14982700 | -0.94675000 | -0.51013000 |
| C           | 1.99453200  | -0.55504700 | -2.23542300 | C | -0.85181400 | -1.22920200 | -0.07041200 |
| H           | 1.49951300  | -1.51144500 | -2.46345600 | H | -0.34206300 | -2.09162200 | -0.52146000 |
| H           | 3.01159800  | -0.59720000 | -2.64666600 | H | -1.33800500 | -1.50747700 | 0.99506500  |
| C           | -5.06404700 | 3.00851000  | 0.08962400  | C | -2.72969500 | -1.92574600 | -1.50263400 |
| H           | -6.11813600 | 2.69601900  | 0.13515700  | H | -3.71926000 | -2.27060600 | -1.16748700 |
| H           | -4.88279400 | 3.70995300  | 0.91385000  | H | -2.09158300 | -2.82003700 | -1.53334500 |
| H           | -4.92256500 | 3.54587300  | -0.85894300 | C | 5.20385900  | 2.05836800  | -1.87793100 |
| C           | 1.17263400  | 0.56722600  | -2.88319900 | H | 6.10194800  | 2.29333600  | -1.28786700 |
| H           | 0.14809900  | 0.55294900  | -2.48552100 | H | 5.52047400  | 1.52586300  | -2.78363300 |
| H           | 1.61402000  | 1.55368900  | -2.68138500 | H | 4.75222800  | 3.01412100  | -2.18132200 |
| H           | 1.12049600  | 0.42737400  | -3.97129600 | C | -2.83273900 | -1.32583000 | -2.90932000 |
|             |             |             |             | H | -3.48231000 | -0.43982000 | -2.91972700 |
| <b>TS14</b> |             |             |             | H | -1.84105700 | -1.01887800 | -3.27013300 |
| S           | 1.26317700  | -1.19124000 | 1.41057800  | H | -3.24205300 | -2.06282000 | -3.61369900 |
| N           | -0.17955500 | -0.52610900 | 0.94608100  |   |             |             |             |
| O           | 1.34214000  | -2.58415600 | 0.96515200  |   |             |             |             |

## Spectra

**Supplementary Figure 15.** 4-Methyl-N-(2-phenylallyl)benzenesulfonamide (**10a**)  
 $^1\text{H}$  NMR (400 MHz, 293 K,  $\text{CDCl}_3$ )

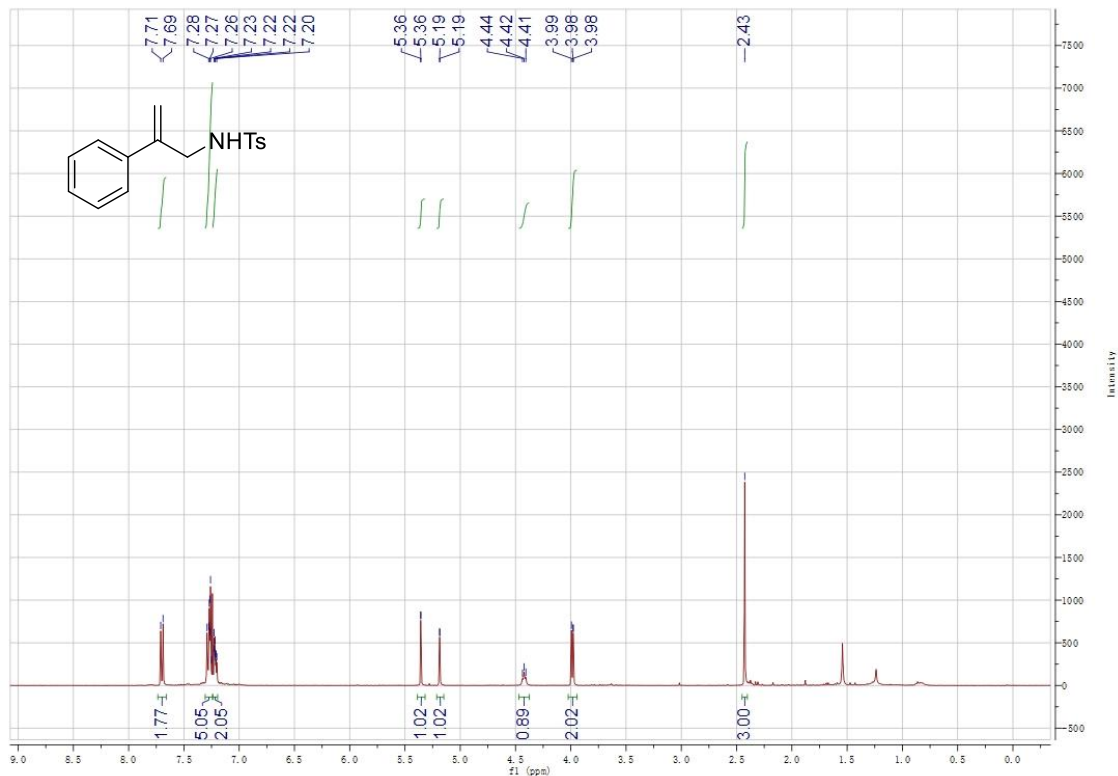

$^{13}\text{C}$  NMR (101 MHz, 293 K,  $\text{CDCl}_3$ )

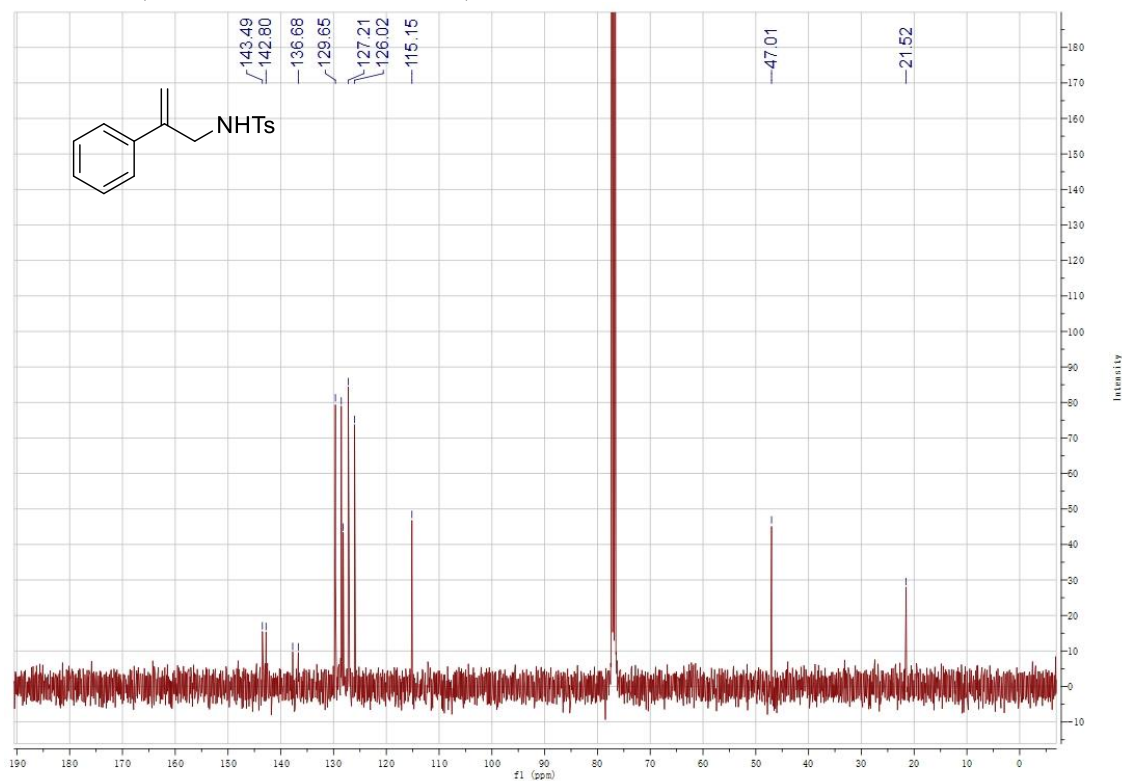

**Supplementary Figure 16.** 4-Methyl-N-(2-phenylallyl-3,3-d<sub>2</sub>)benzenesulfonamide (**10a-d<sub>2</sub>**)  
<sup>1</sup>H NMR (400 MHz, 293 K, CDCl<sub>3</sub>)

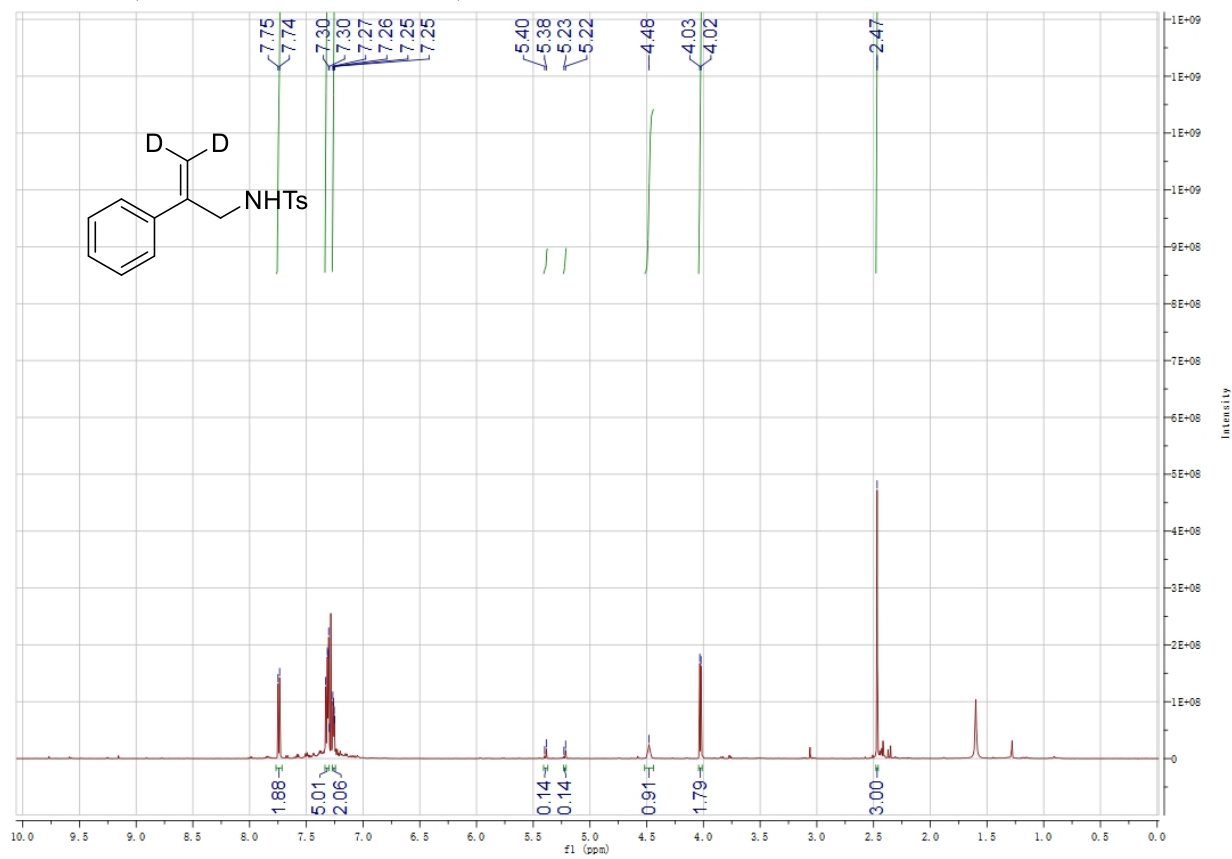

<sup>13</sup>C NMR (101 MHz, 293 K, CDCl<sub>3</sub>)

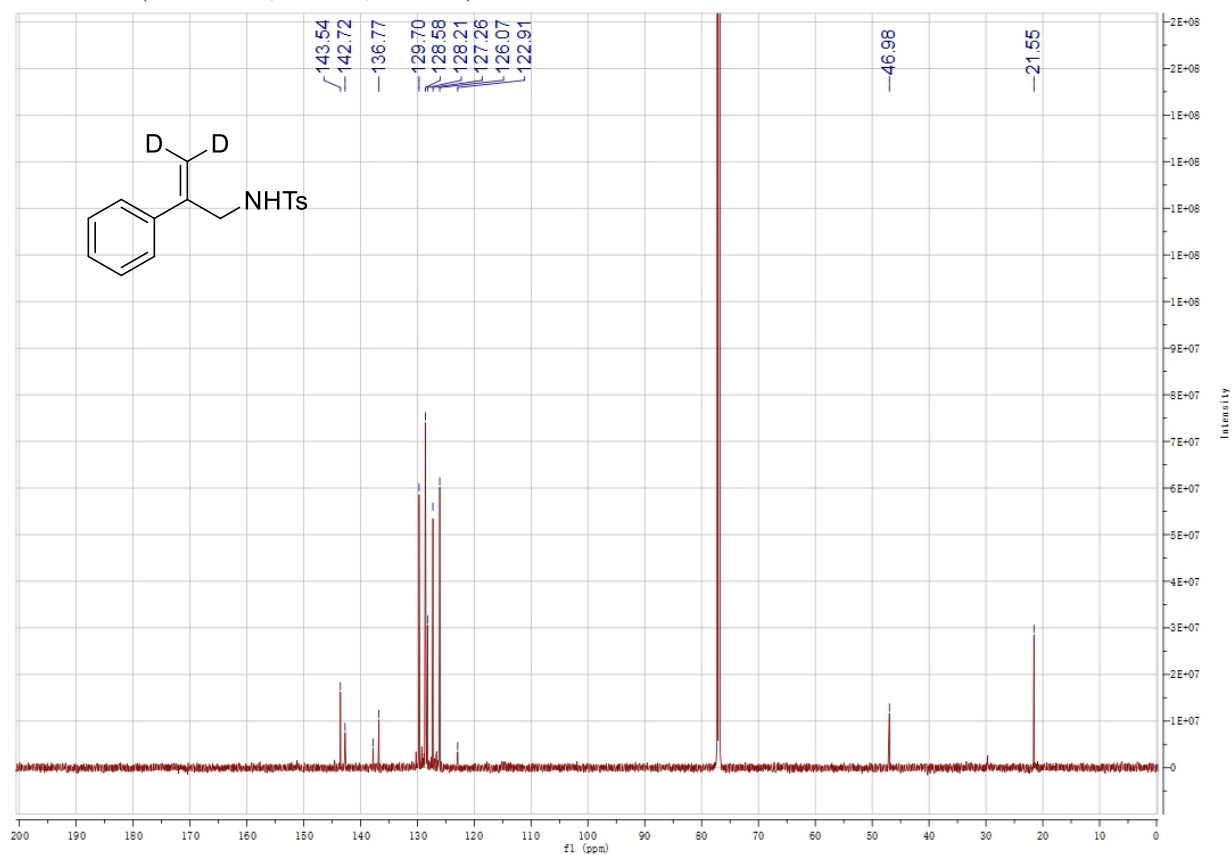



**Supplementary Figure 17. 4-Methyl-N-(2-(p-tolyl)allyl)benzenesulfonamide (10b)**

<sup>1</sup>H NMR (600 MHz, 293 K, CDCl<sub>3</sub>)

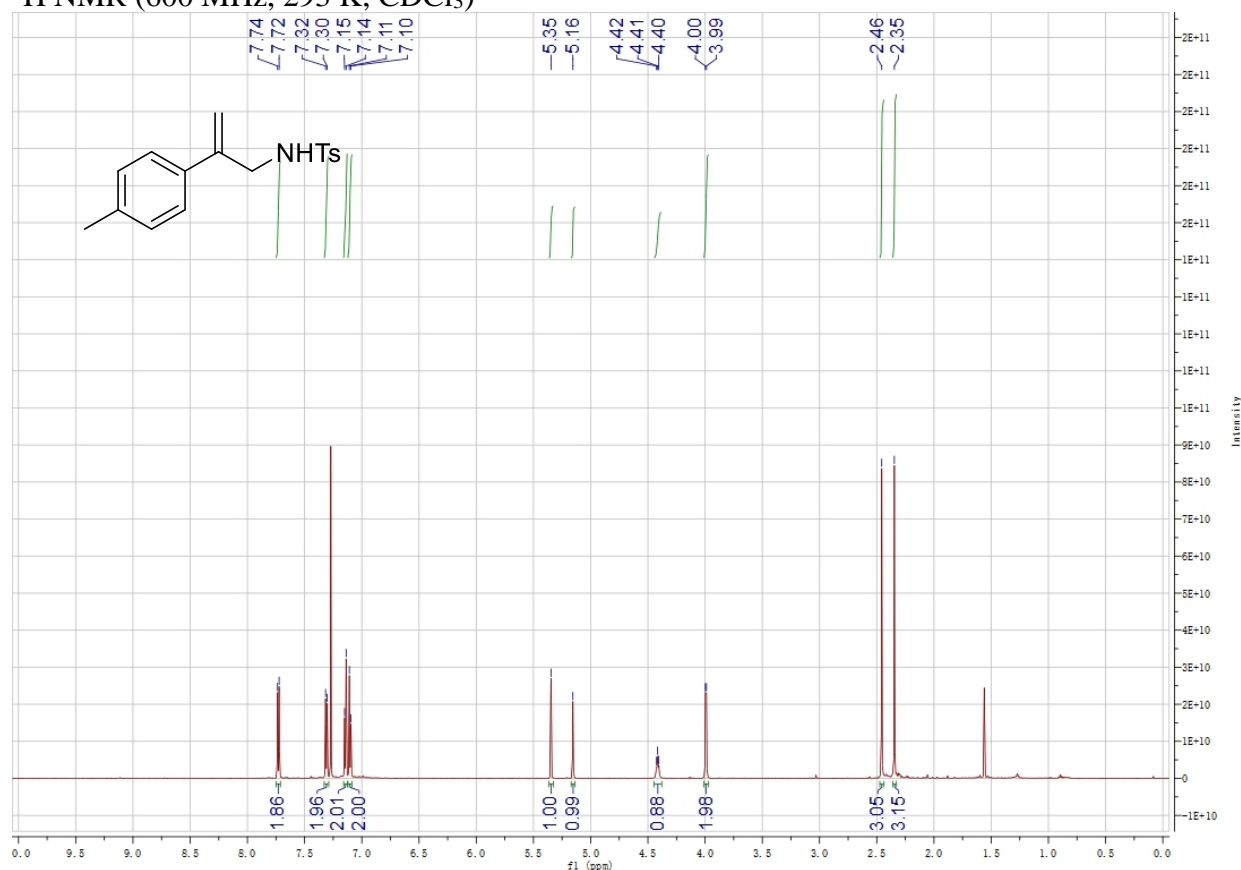

<sup>13</sup>C NMR (151 MHz, 293 K, CDCl<sub>3</sub>)

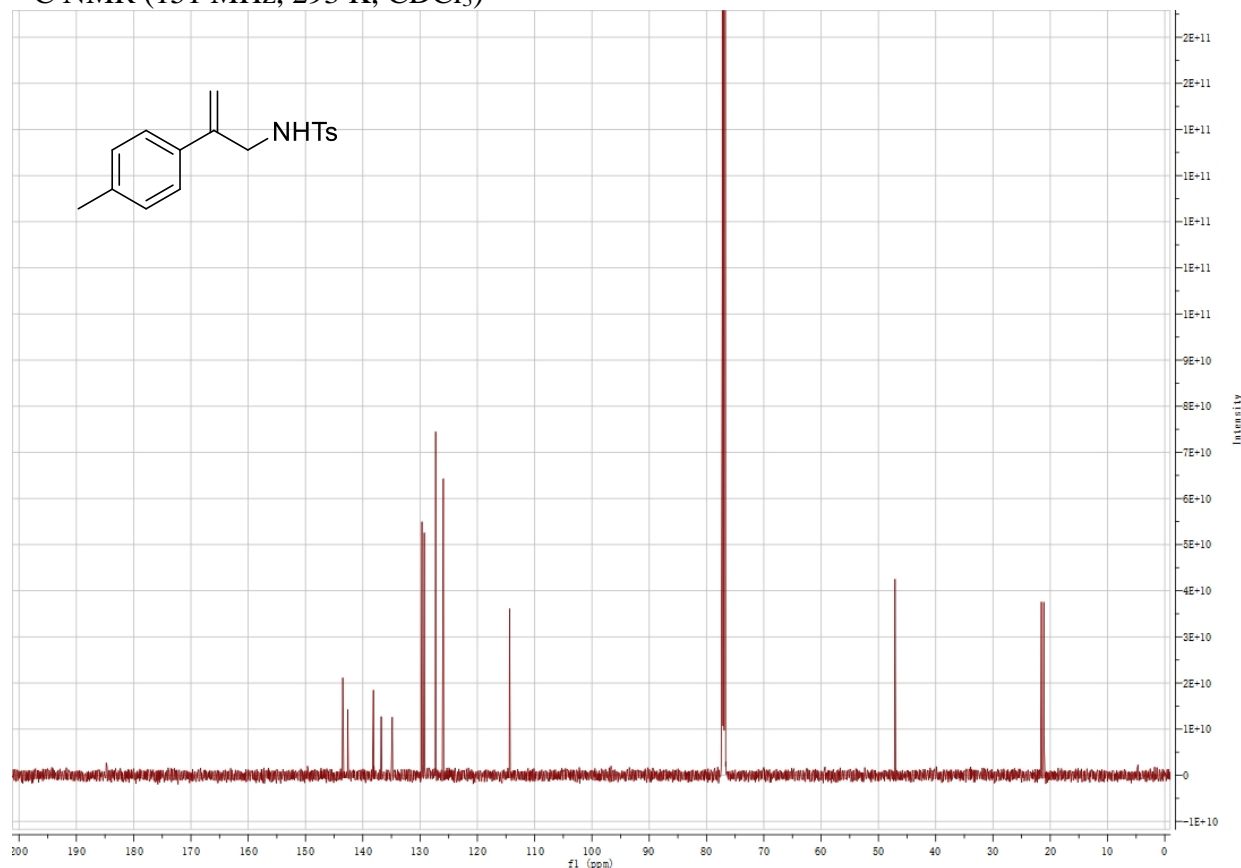

**Supplementary Figure 18.** *N*-(2-(4-Butylphenyl)allyl)-4-methylbenzenesulfonamide (**10c**)  
<sup>1</sup>H NMR (600 MHz, 293 K, CDCl<sub>3</sub>)

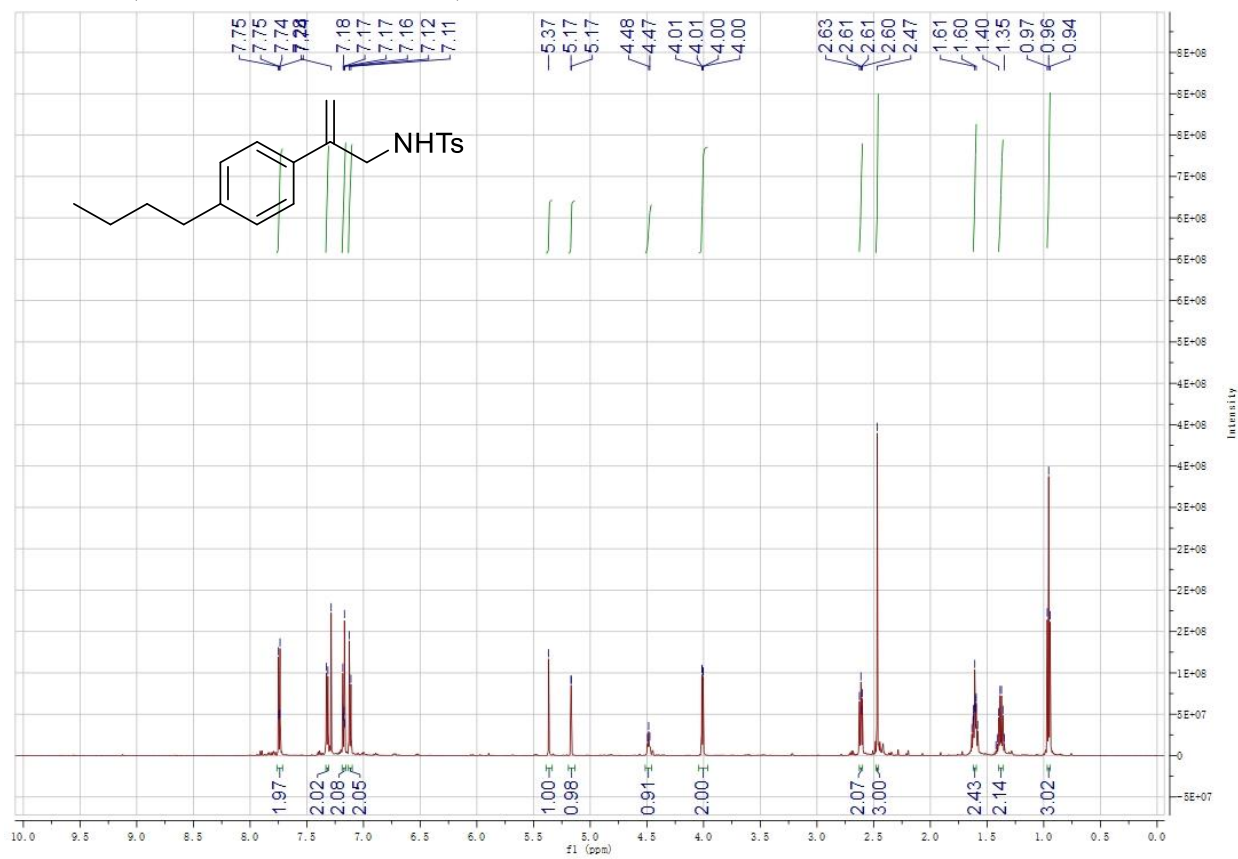

<sup>13</sup>C NMR (151 MHz, 293 K, CDCl<sub>3</sub>)

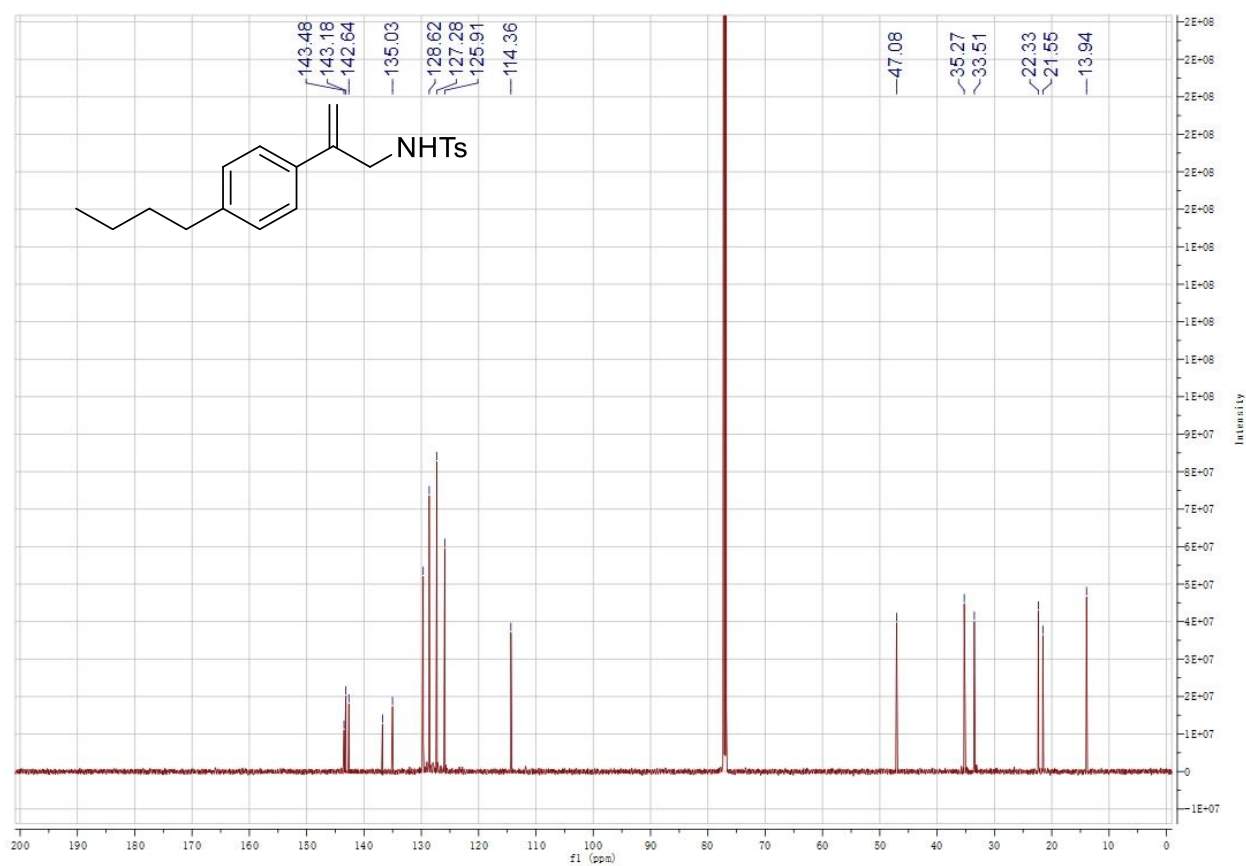

**Supplementary Figure 19.** *N*-(2-(4-Fluorophenyl)allyl)-4-methylbenzenesulfonamide (**10d**)  
<sup>1</sup>H NMR (600 MHz, 293 K, CDCl<sub>3</sub>)

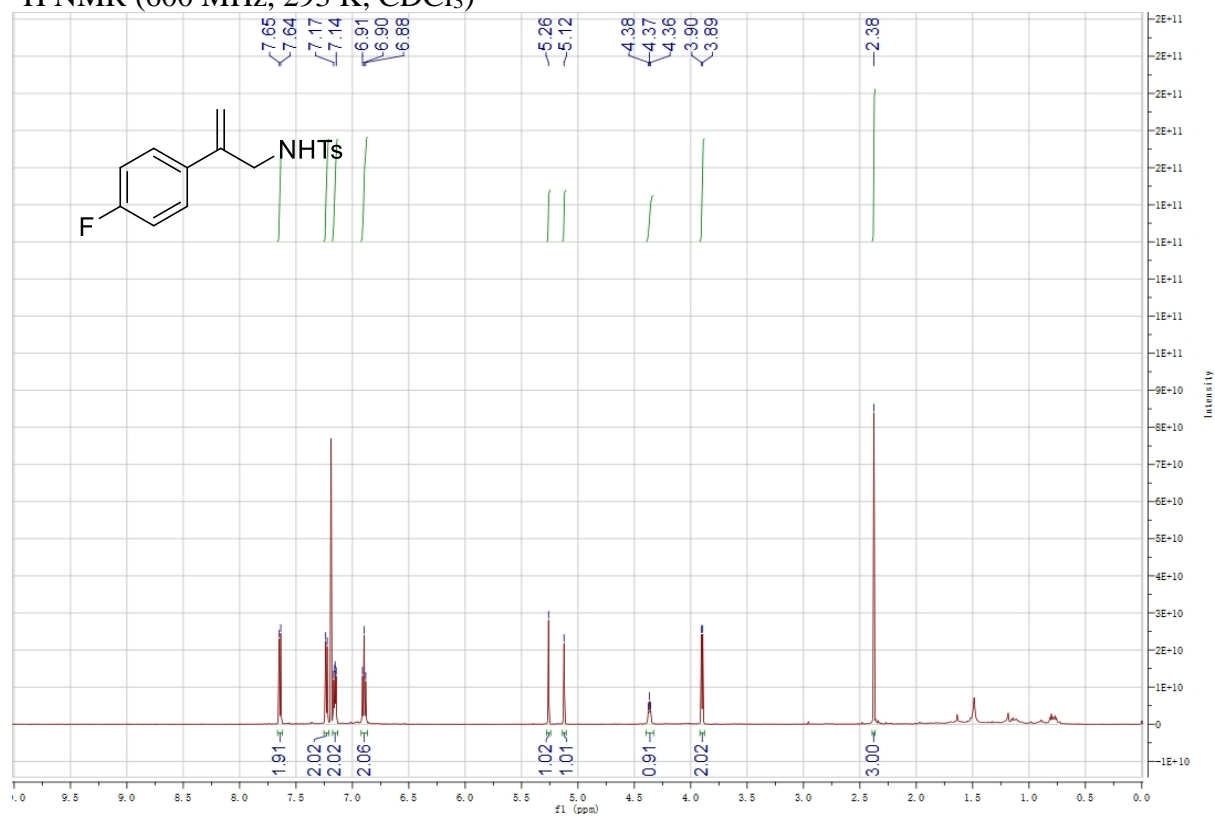

<sup>13</sup>C NMR (151 MHz, 293 K, CDCl<sub>3</sub>)

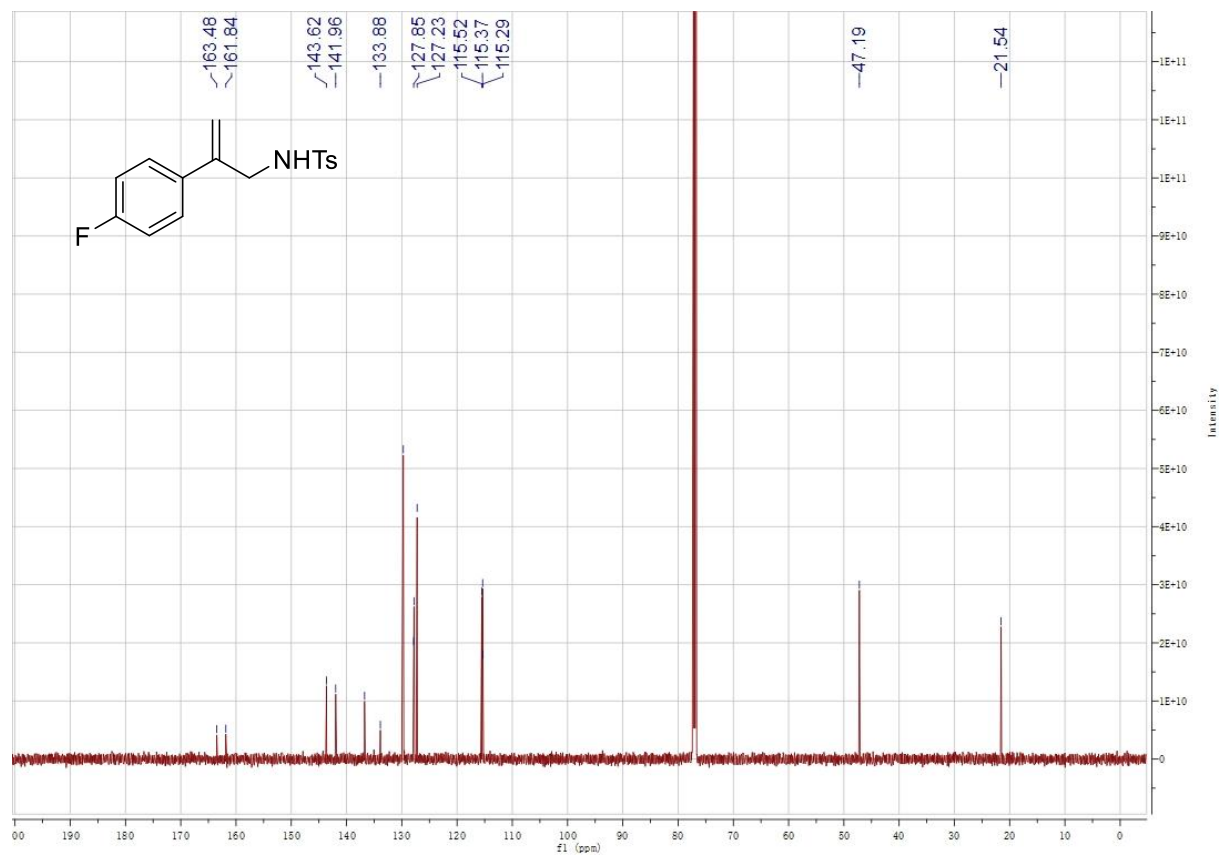

$^{19}\text{F}$ NMR (565 MHz, 293 K,  $\text{CDCl}_3$ )

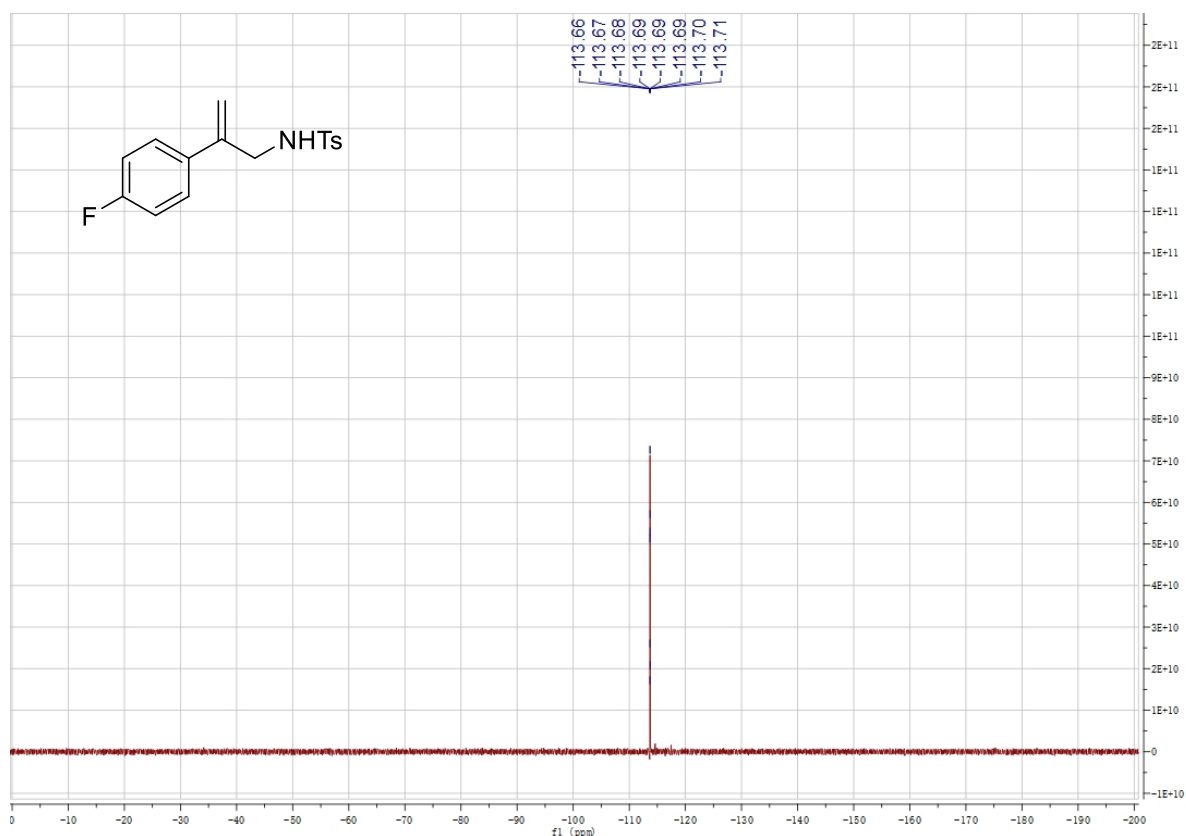

**Supplementary Figure 20.** *N*-(2-(4-Chlorophenyl)allyl)-4-methylbenzenesulfonamide (**10e**)

$^1\text{H}$  NMR (600 MHz, 293 K,  $\text{CDCl}_3$ )

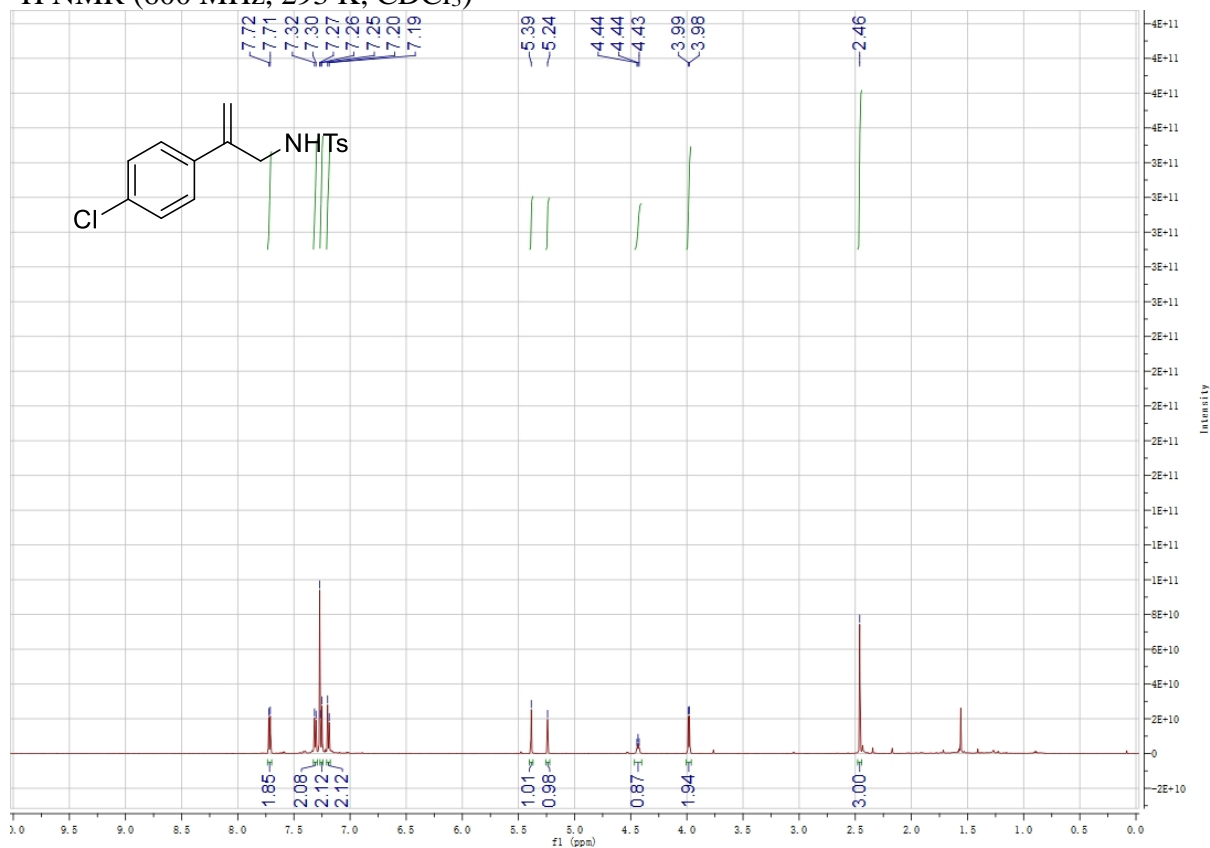

$^{13}\text{C}$  NMR (151 MHz, 293 K,  $\text{CDCl}_3$ )

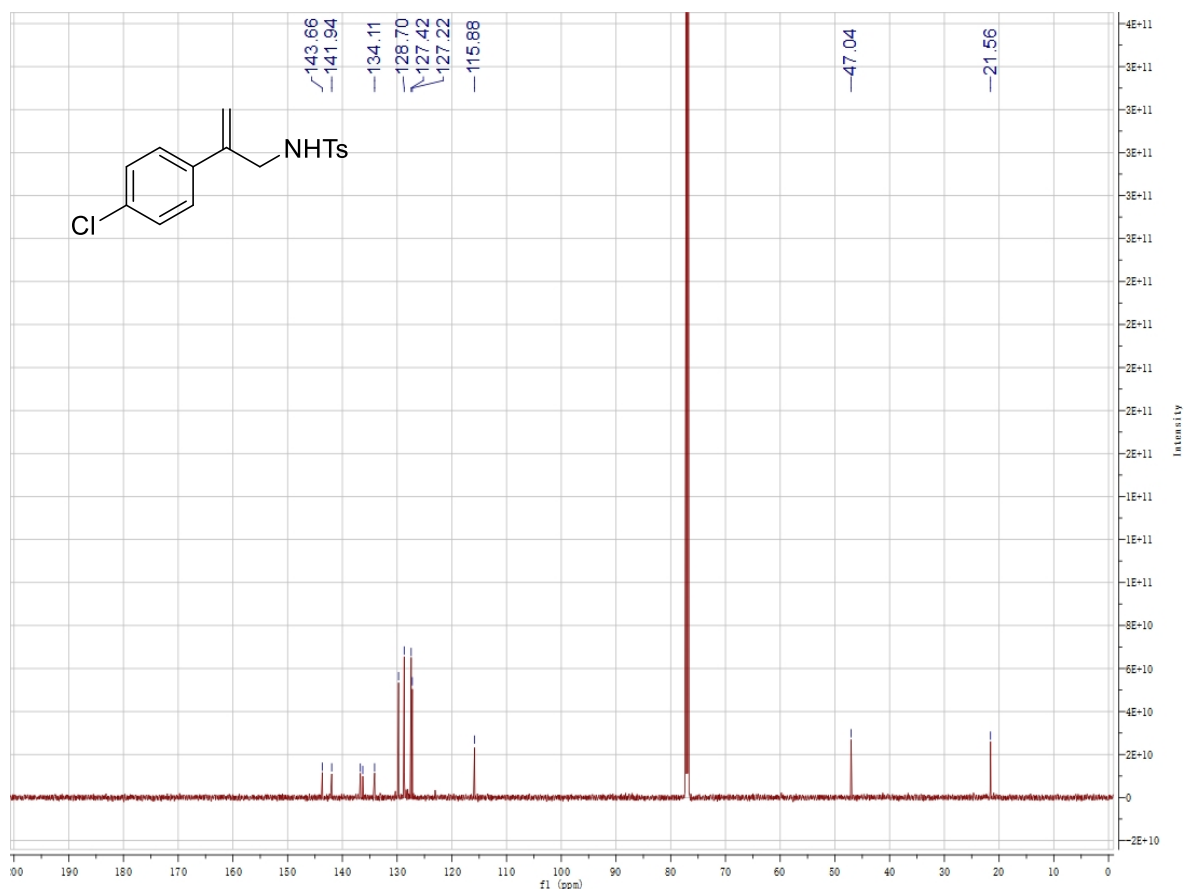

**Supplementary Figure 21.** *N*-(2-(4-Bromophenyl)allyl)-4-methylbenzenesulfonamide (**10f**)  
 $^1\text{H}$  NMR (400 MHz, 293 K,  $\text{CDCl}_3$ )

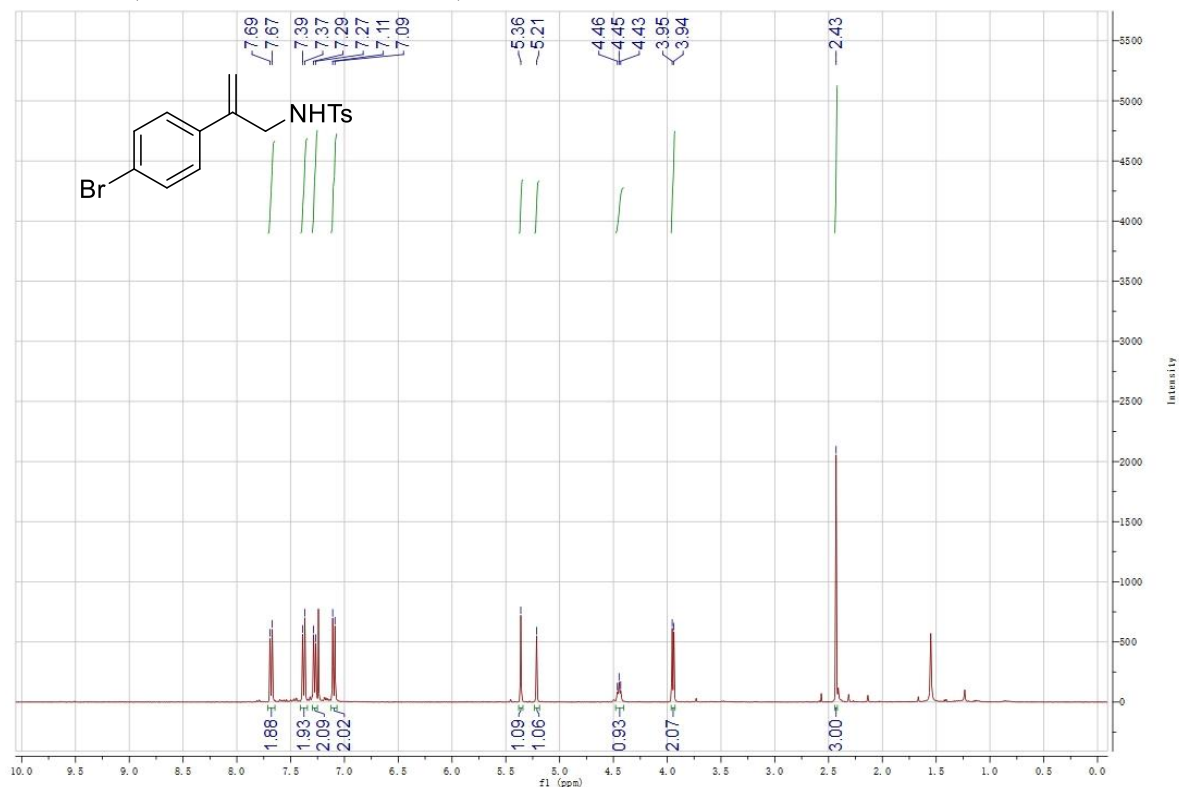

$^{13}\text{C}$  NMR (101 MHz, 293 K,  $\text{CDCl}_3$ )

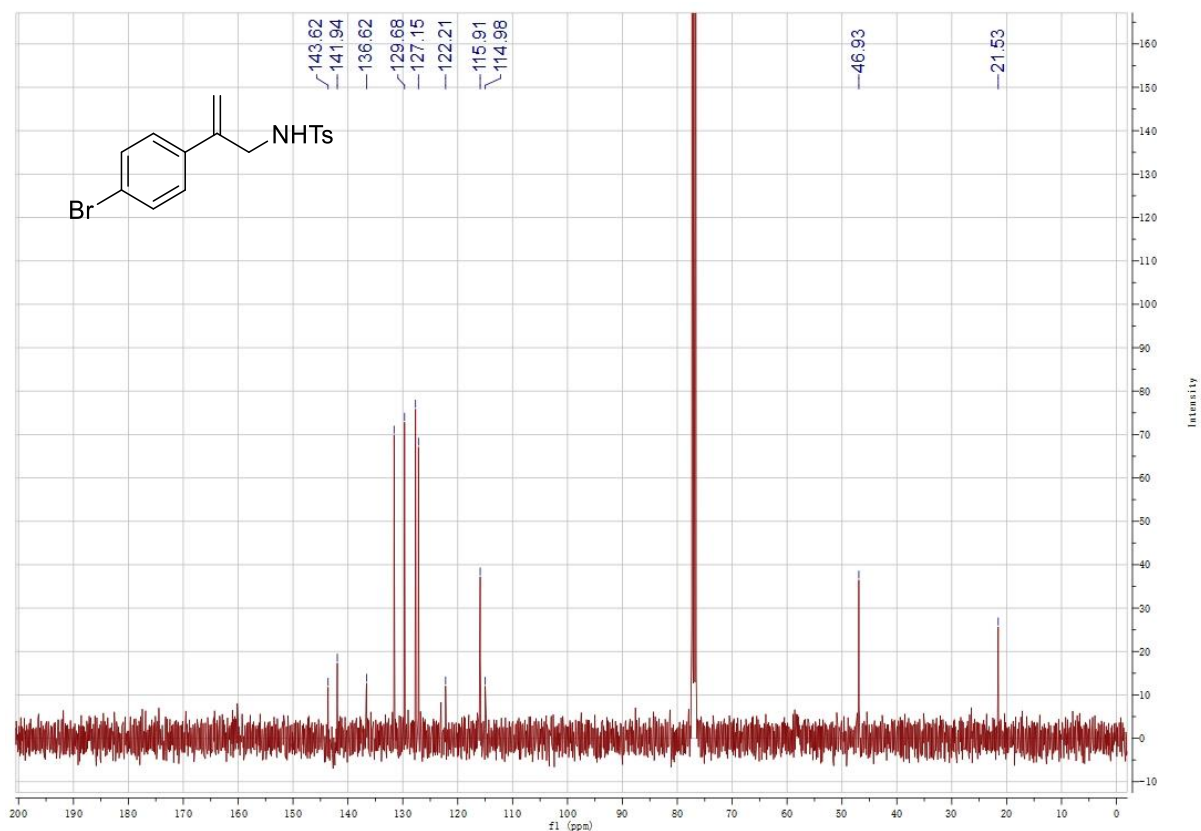

**Supplementary Figure 22.** *N*-(2-(4-Methoxyphenyl)allyl)-4-methylbenzenesulfonamide (**10g**)

$^1\text{H}$  NMR (600 MHz, 293 K,  $\text{CDCl}_3$ )

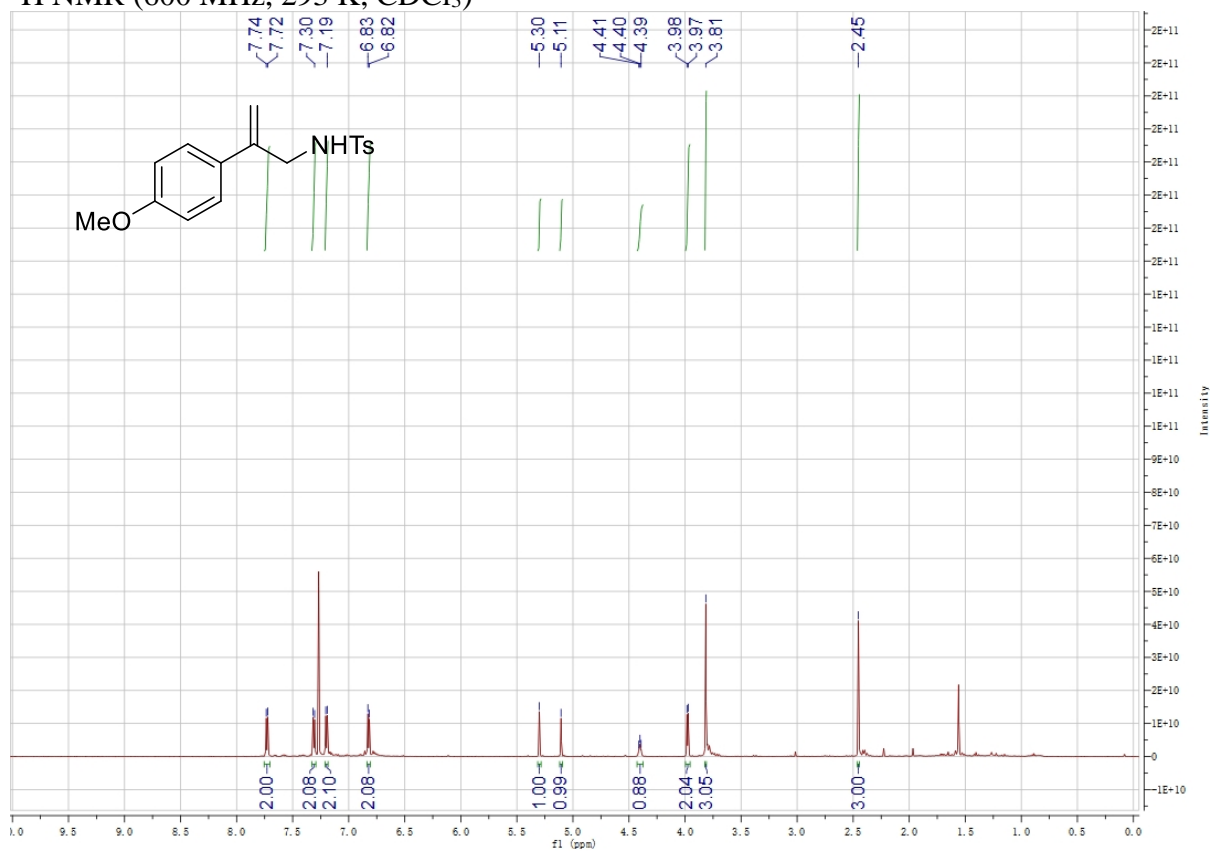

$^{13}\text{C}$  NMR (151 MHz, 293 K,  $\text{CDCl}_3$ )

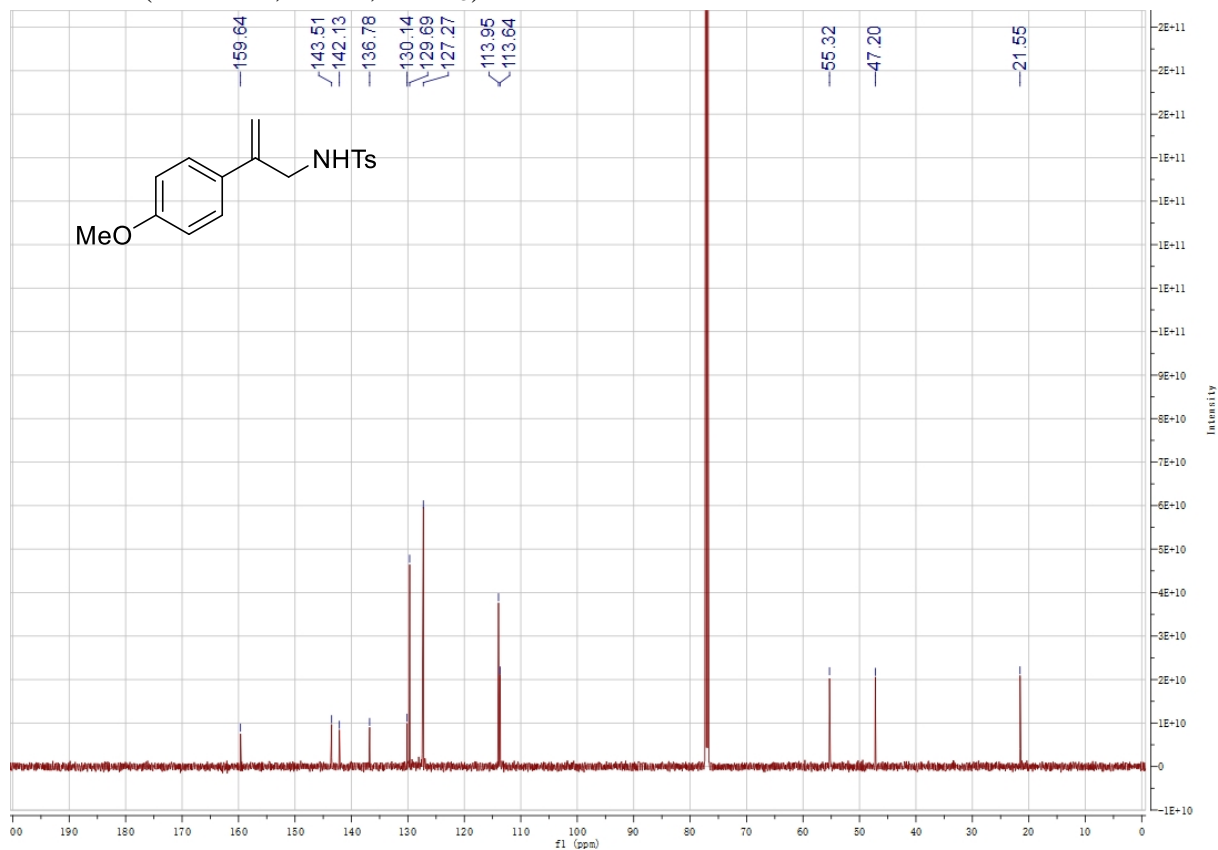

**Supplementary Figure 23.** *N*-(2-(4-Cyanophenyl)allyl)-4-methylbenzenesulfonamide (**10h**)

$^1\text{H}$  NMR (600 MHz, 293 K,  $\text{CDCl}_3$ )

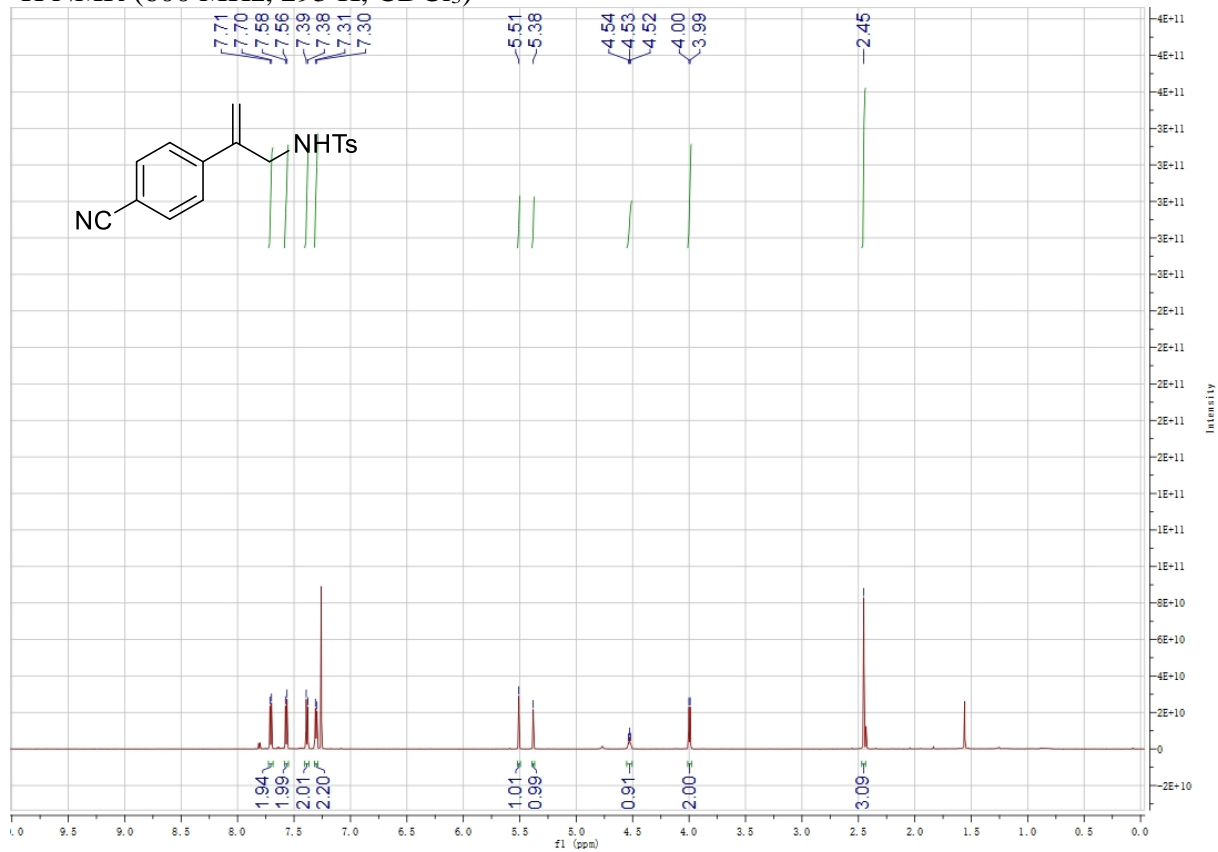

$^{13}\text{C}$  NMR (151 MHz, 293 K,  $\text{CDCl}_3$ )

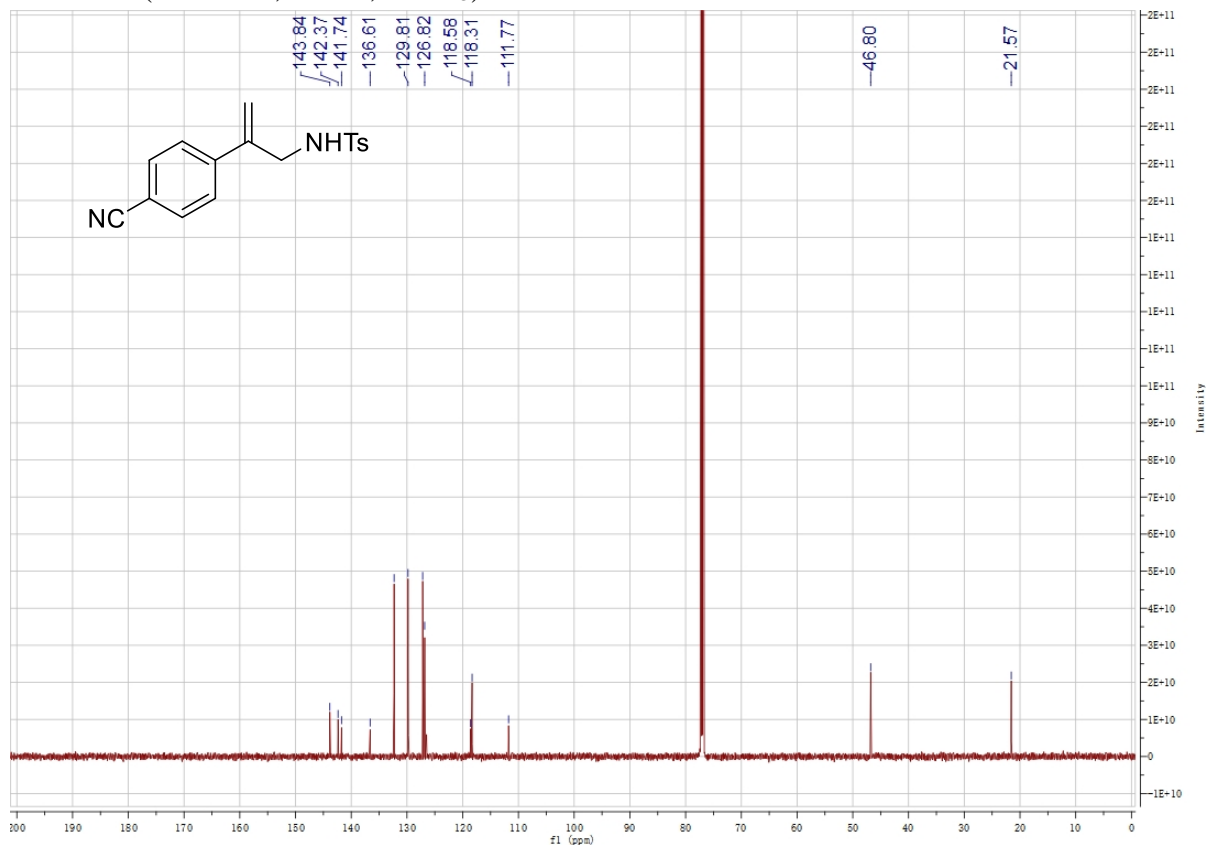

**Supplementary Figure 24.** *N*-(2-(3-Fluorophenyl)allyl)-4-methylbenzenesulfonamide (**10i**)

$^1\text{H}$  NMR (600 MHz, 293 K,  $\text{CDCl}_3$ )

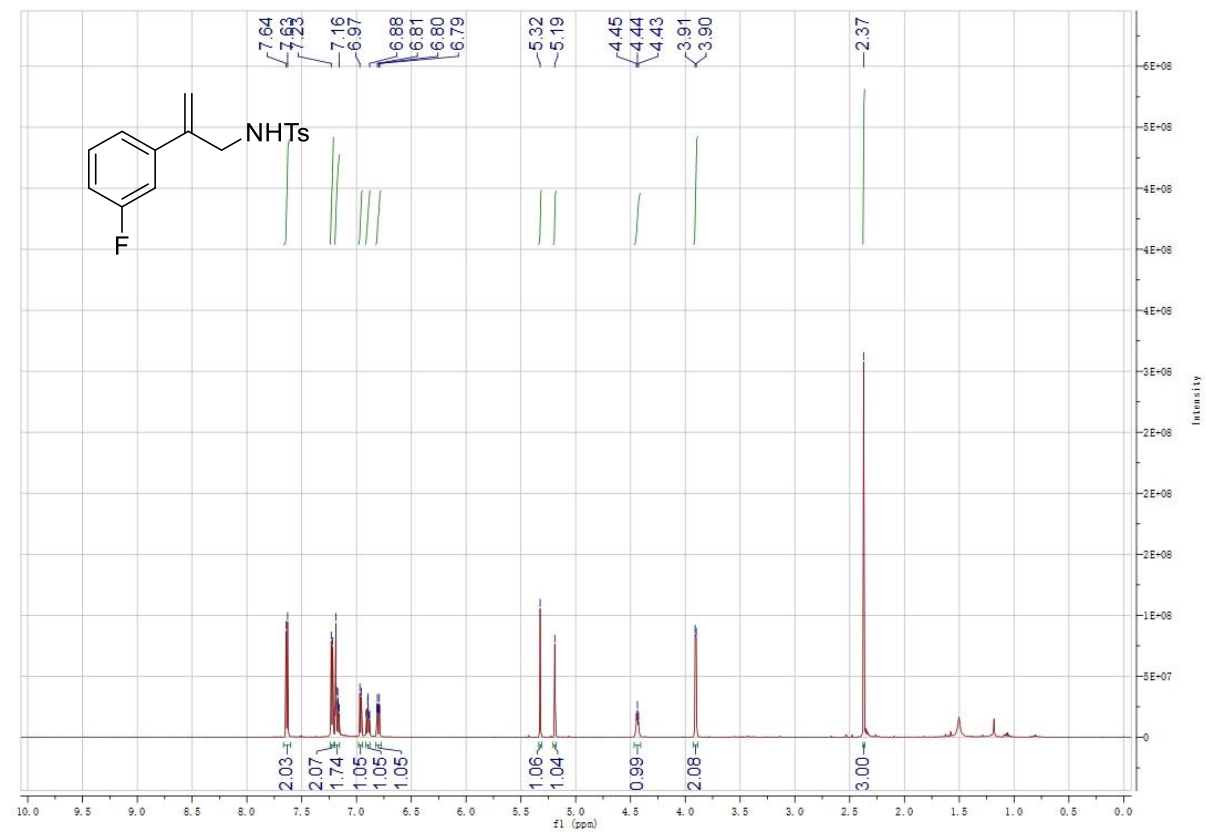



$^{13}\text{C}$  NMR (151 MHz, 293 K,  $\text{CDCl}_3$ )

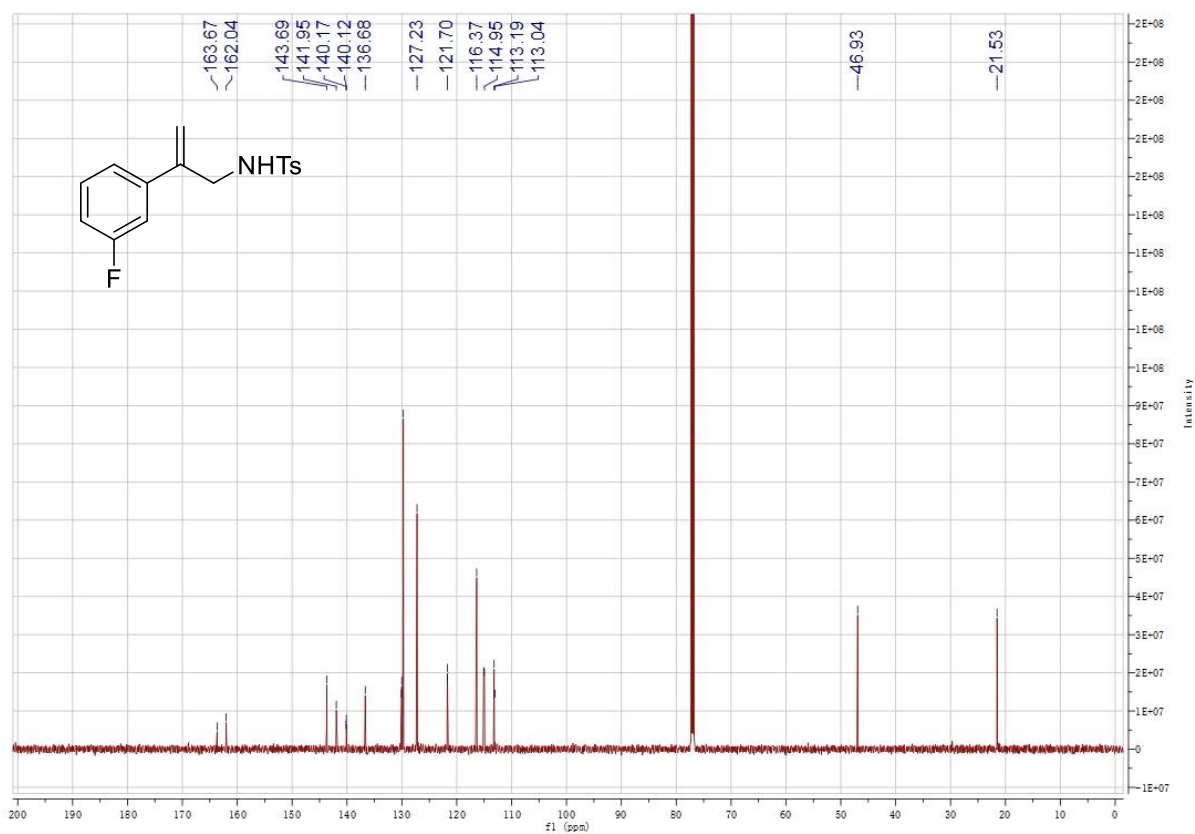

$^{19}\text{F}$  NMR (565 MHz, 293 K,  $\text{CDCl}_3$ )

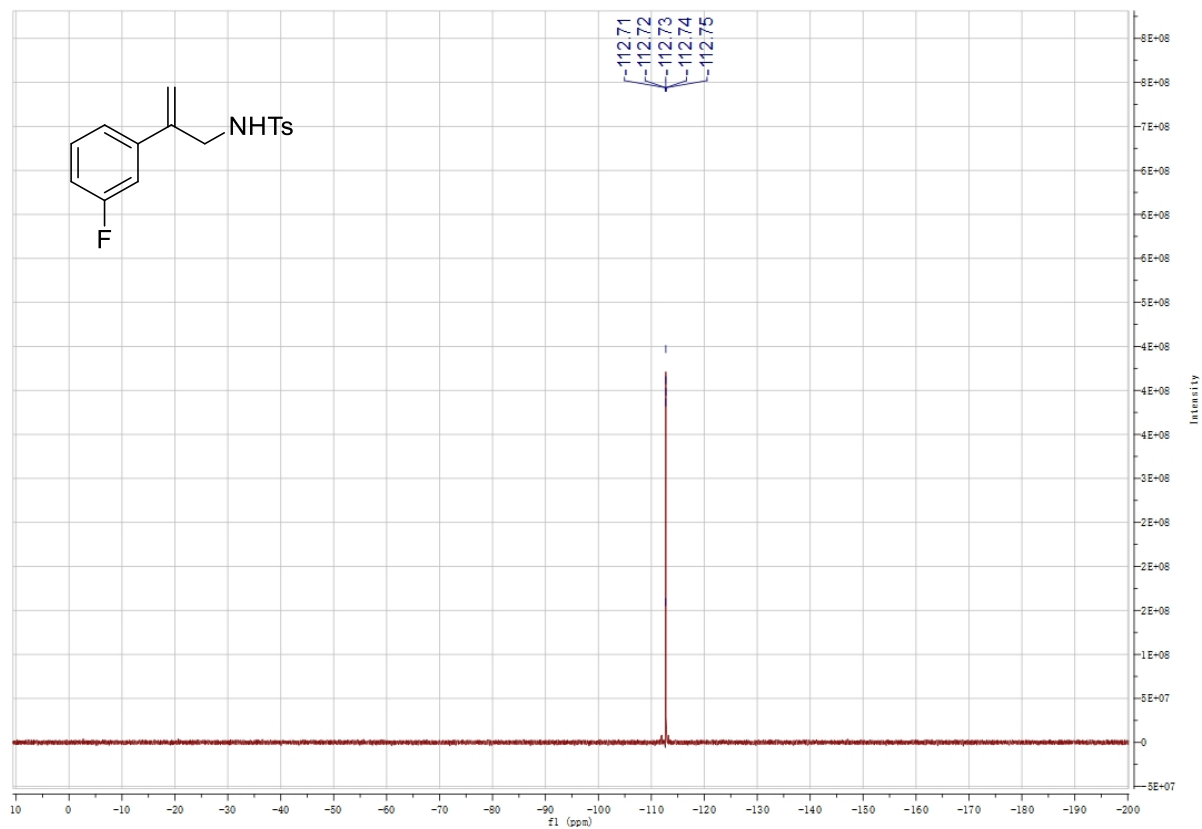

**Supplementary Figure 25. 4-Methyl-N-(2-(*m*-tolyl)allyl)benzenesulfonamide (10j)**

<sup>1</sup>H NMR (600 MHz, 293 K, CDCl<sub>3</sub>)

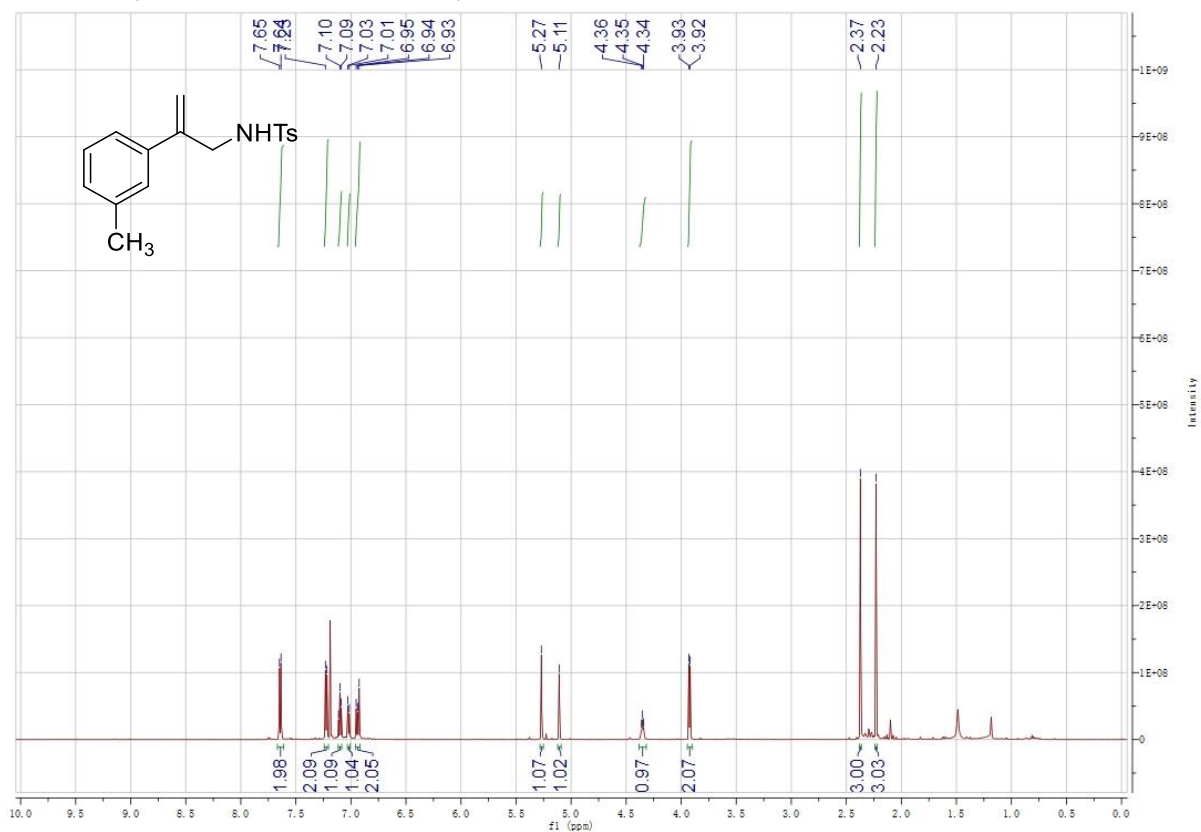

<sup>13</sup>C NMR (151 MHz, 293 K, CDCl<sub>3</sub>)

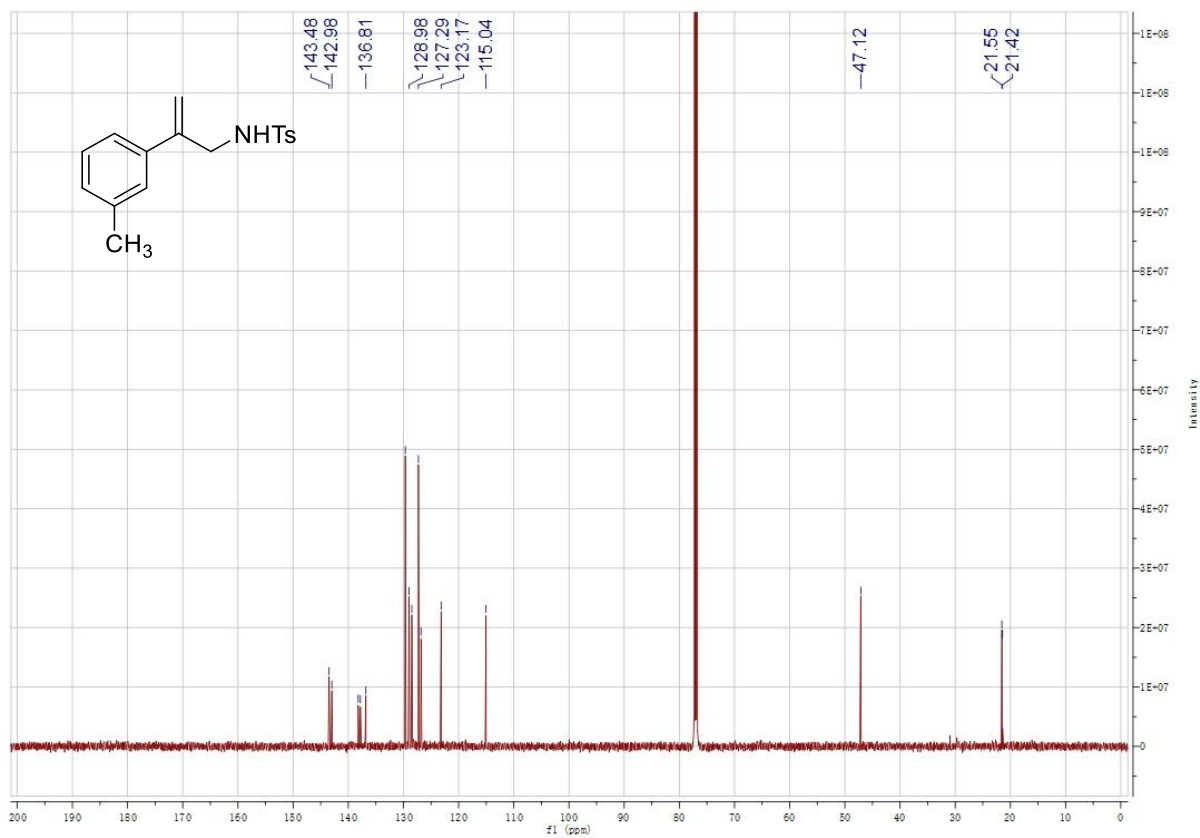

**Supplementary Figure 26.** *N*-(2-(3-Methoxyphenyl)allyl)-4-methylbenzenesulfonamide (**10k**)  
<sup>1</sup>H NMR (600 MHz, 293 K, CDCl<sub>3</sub>)

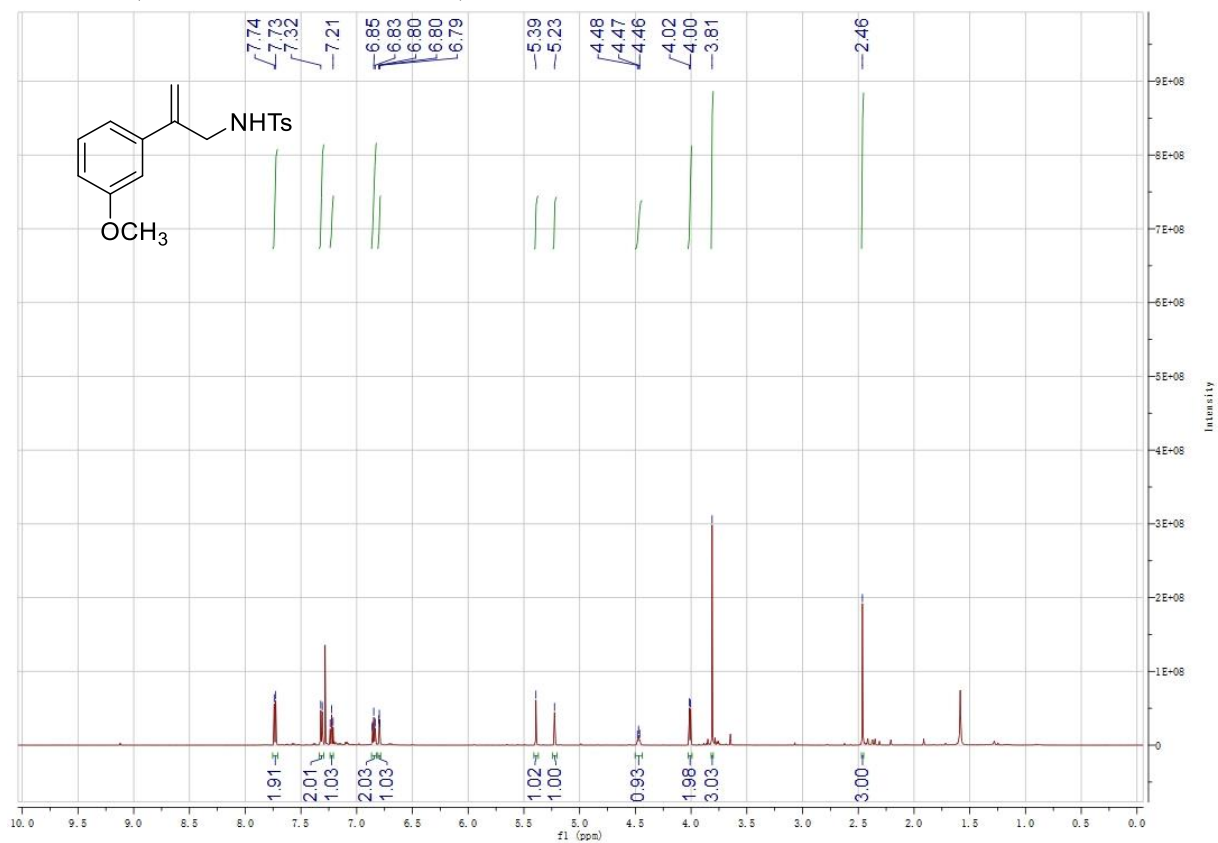

<sup>13</sup>C NMR (151 MHz, 293 K, CDCl<sub>3</sub>)

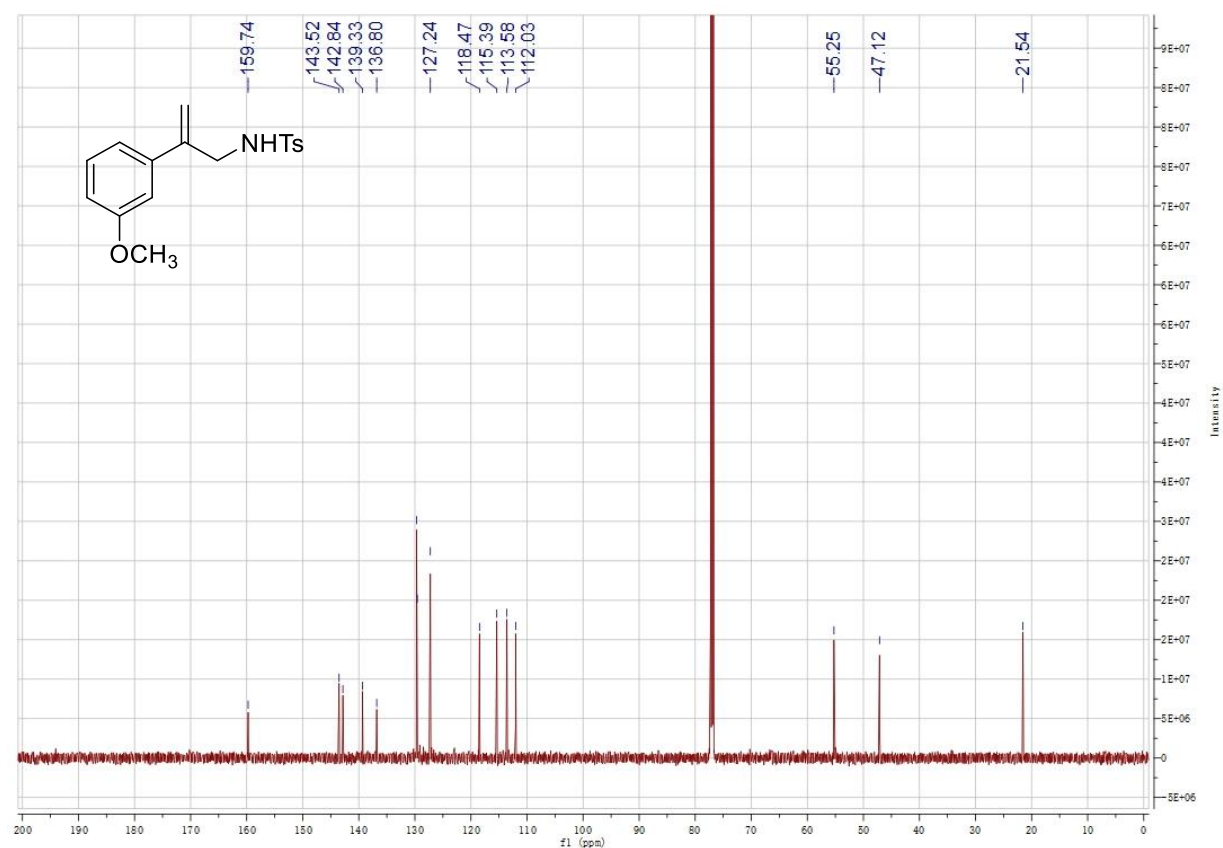

**Supplementary Figure 27.**

*4-Methyl-N-(2-(3-(trifluoromethyl)phenyl)allyl)benzenesulfonamide (10l)*

$^1\text{H NMR}$  (600 MHz, 293 K,  $\text{CDCl}_3$ )

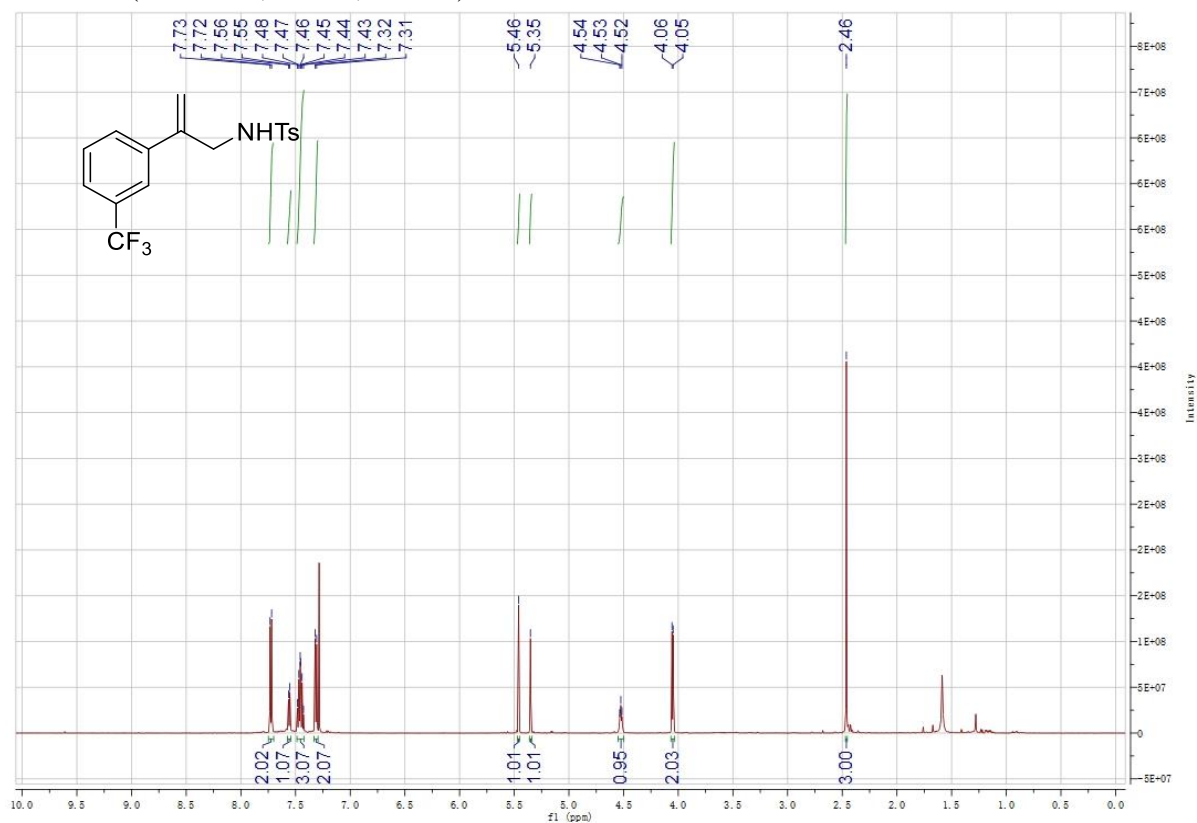

$^{13}\text{C NMR}$  (151 MHz, 293 K,  $\text{CDCl}_3$ )

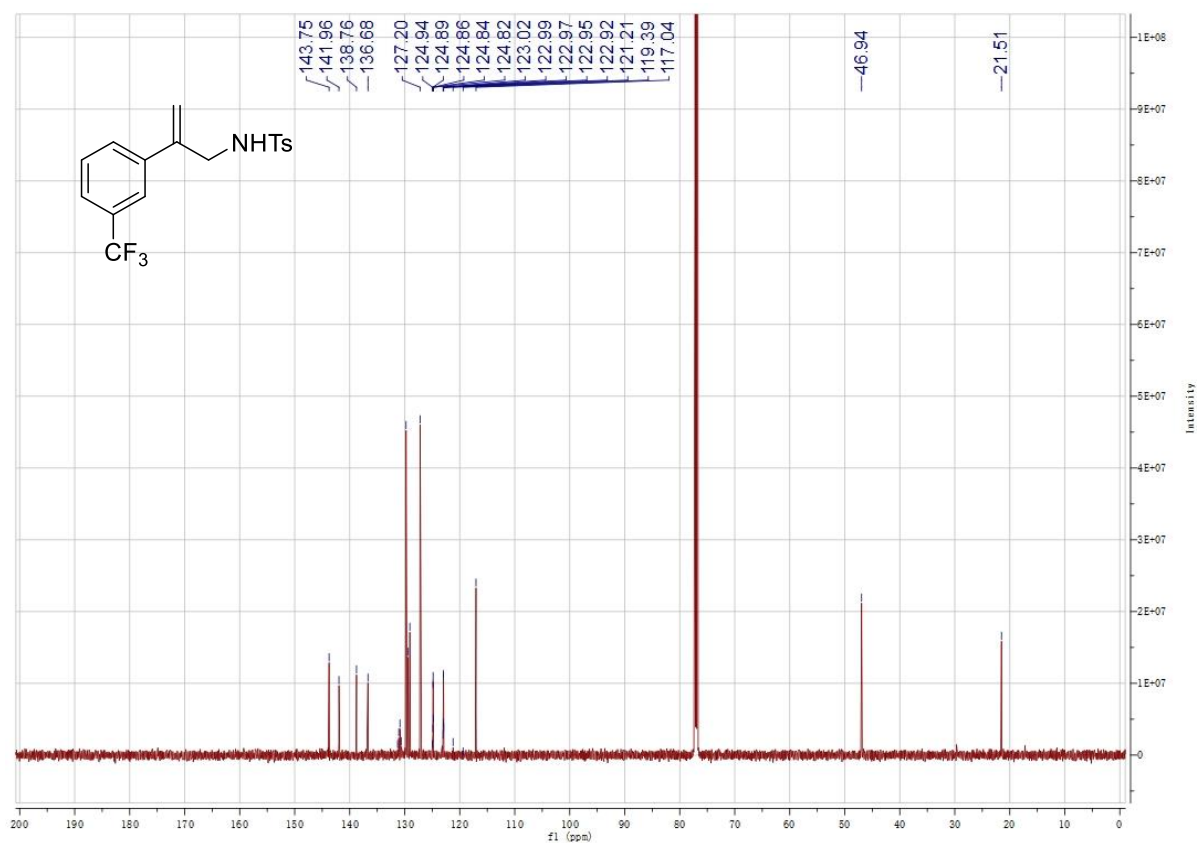

$^{19}\text{F}$  NMR (565 MHz, 293 K,  $\text{CDCl}_3$ )

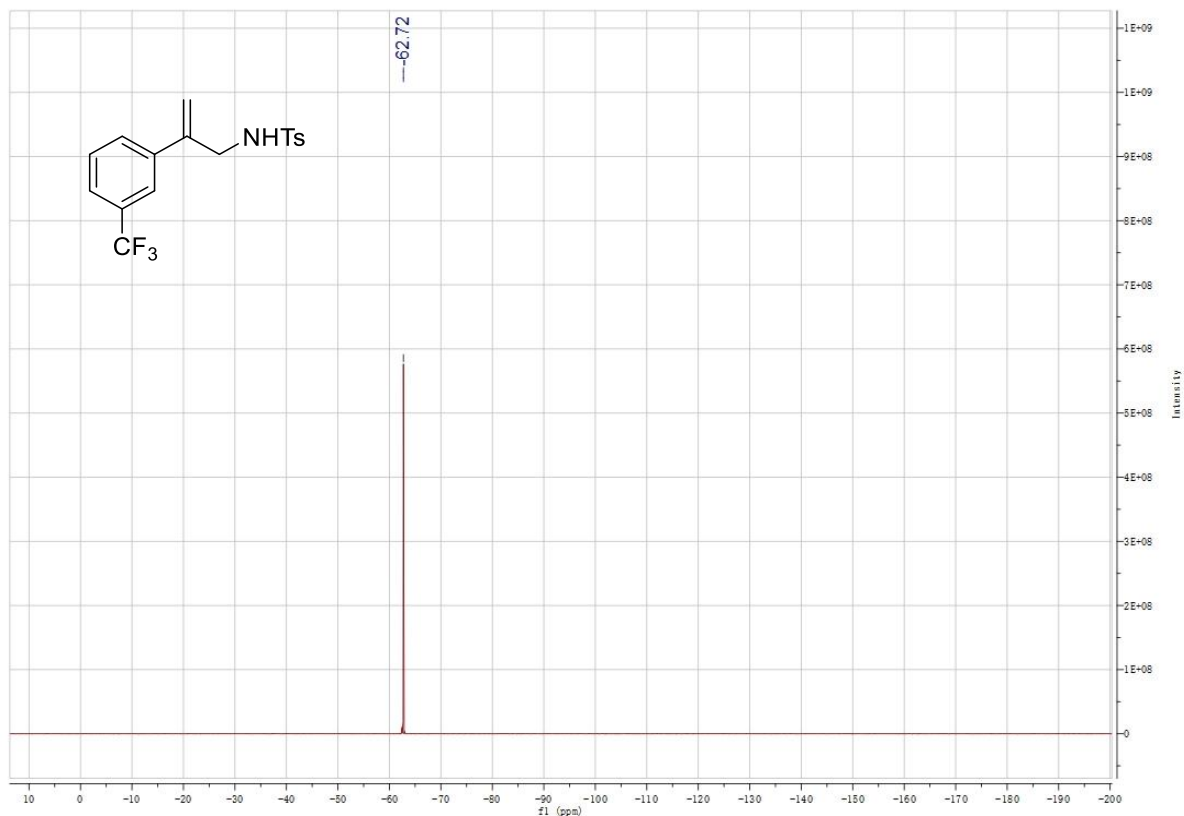

**Supplementary Figure 28.** *N*-(2-(2-Bromophenyl)allyl)-4-methylbenzenesulfonamide (**10m**)

$^1\text{H}$  NMR (600 MHz, 293 K,  $\text{CDCl}_3$ )

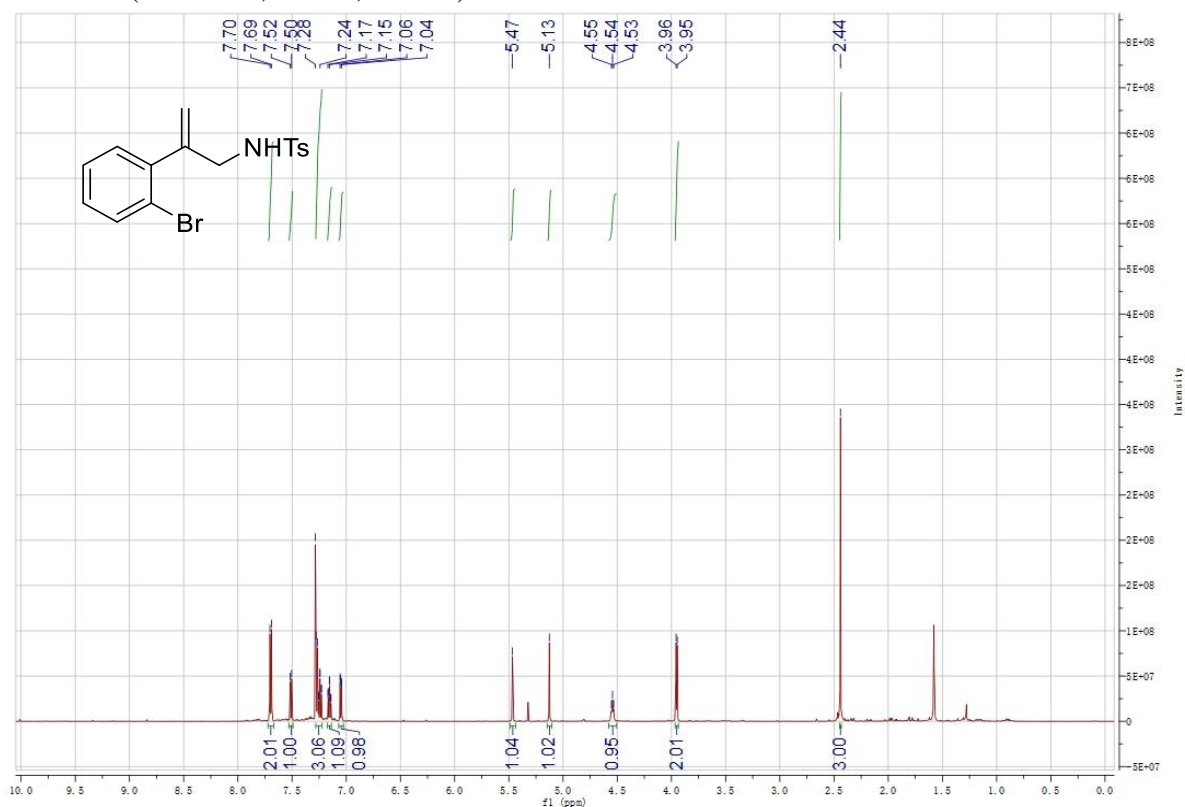

$^{13}\text{C}$  NMR (151 MHz, 293 K,  $\text{CDCl}_3$ )

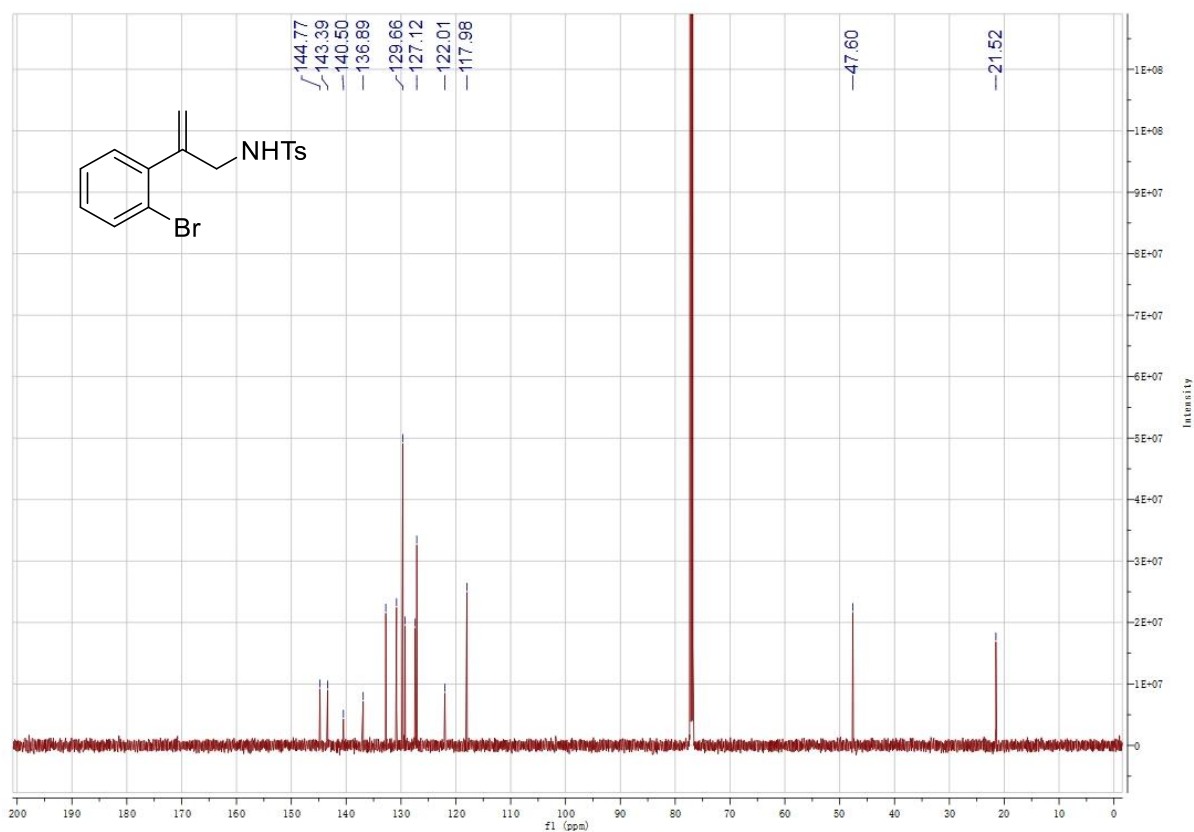

**Supplementary Figure 29.** 4-Methyl-N-(2-(*o*-tolyl)allyl)benzenesulfonamide (**10n**)

$^1\text{H}$  NMR (600 MHz, 293 K,  $\text{CDCl}_3$ )

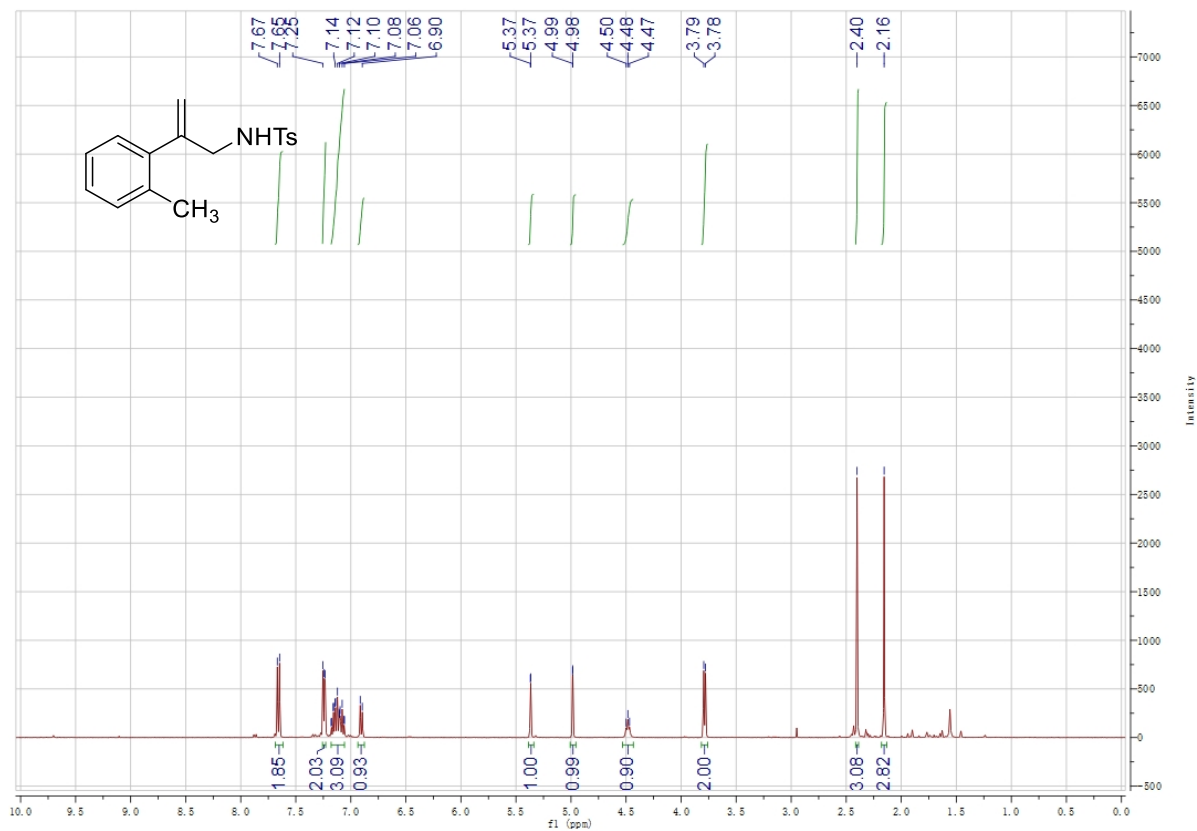

$^{13}\text{C}$  NMR (151 MHz, 293 K,  $\text{CDCl}_3$ )

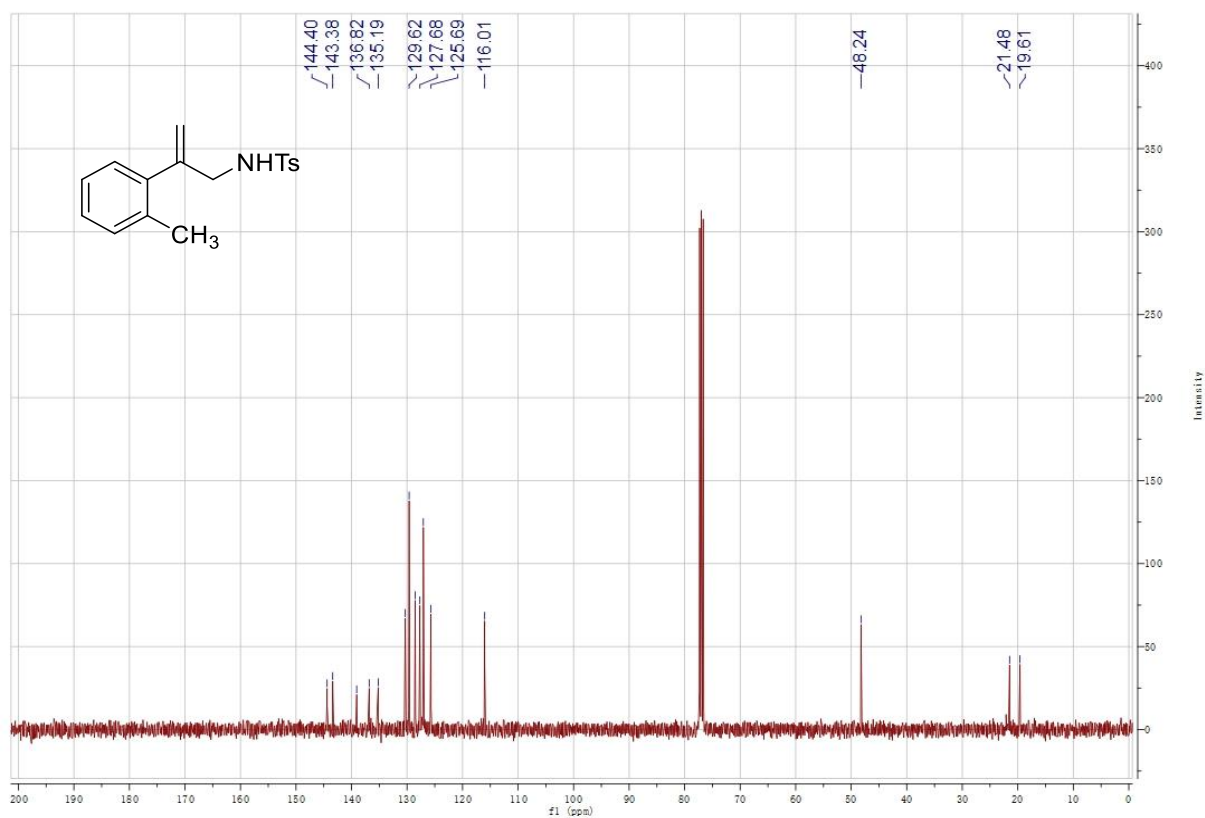

**Supplementary Figure 30.**

*N*-(2-(3,5-Bis(trifluoromethyl)phenyl)allyl)-4-methylbenzenesulfonamide (**10o**)

$^1\text{H}$  NMR (600 MHz, 293 K,  $\text{CDCl}_3$ )

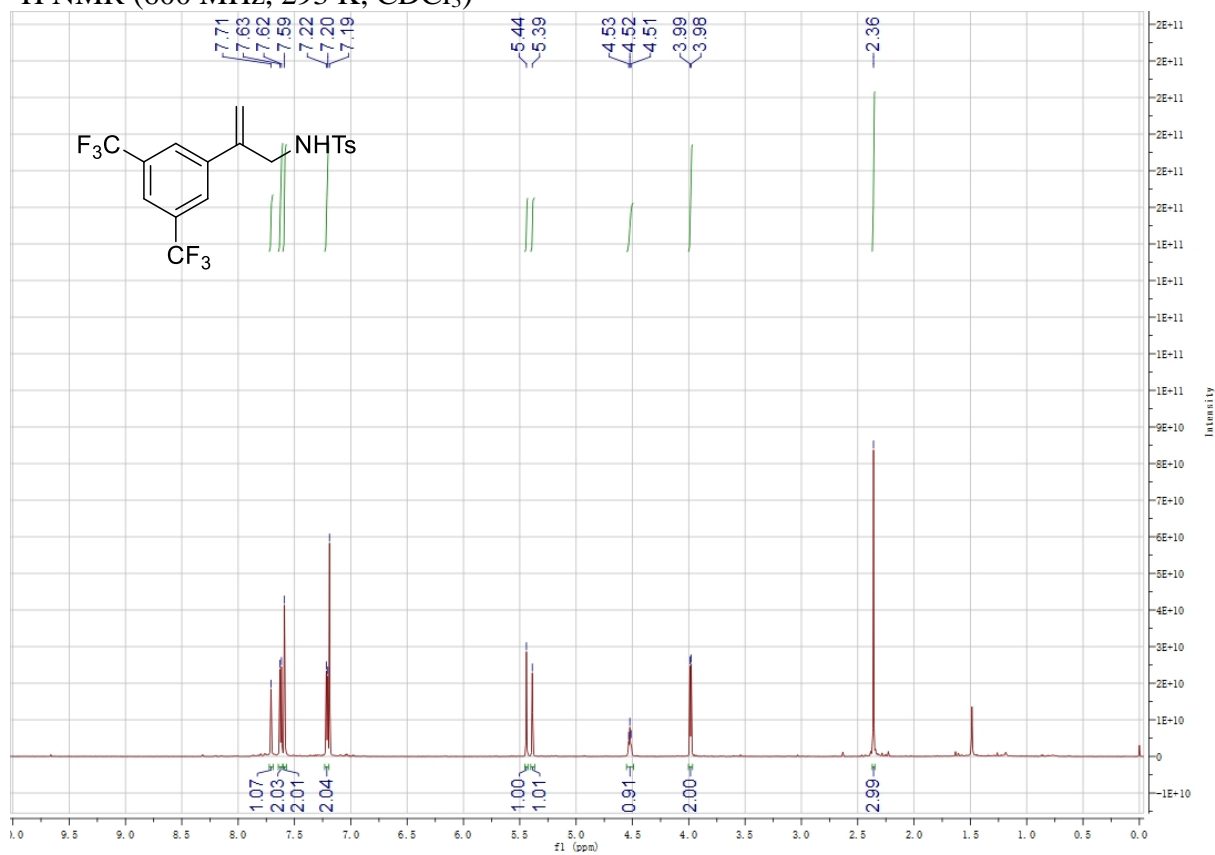

<sup>13</sup>C NMR (151 MHz, 293 K, CDCl<sub>3</sub>)

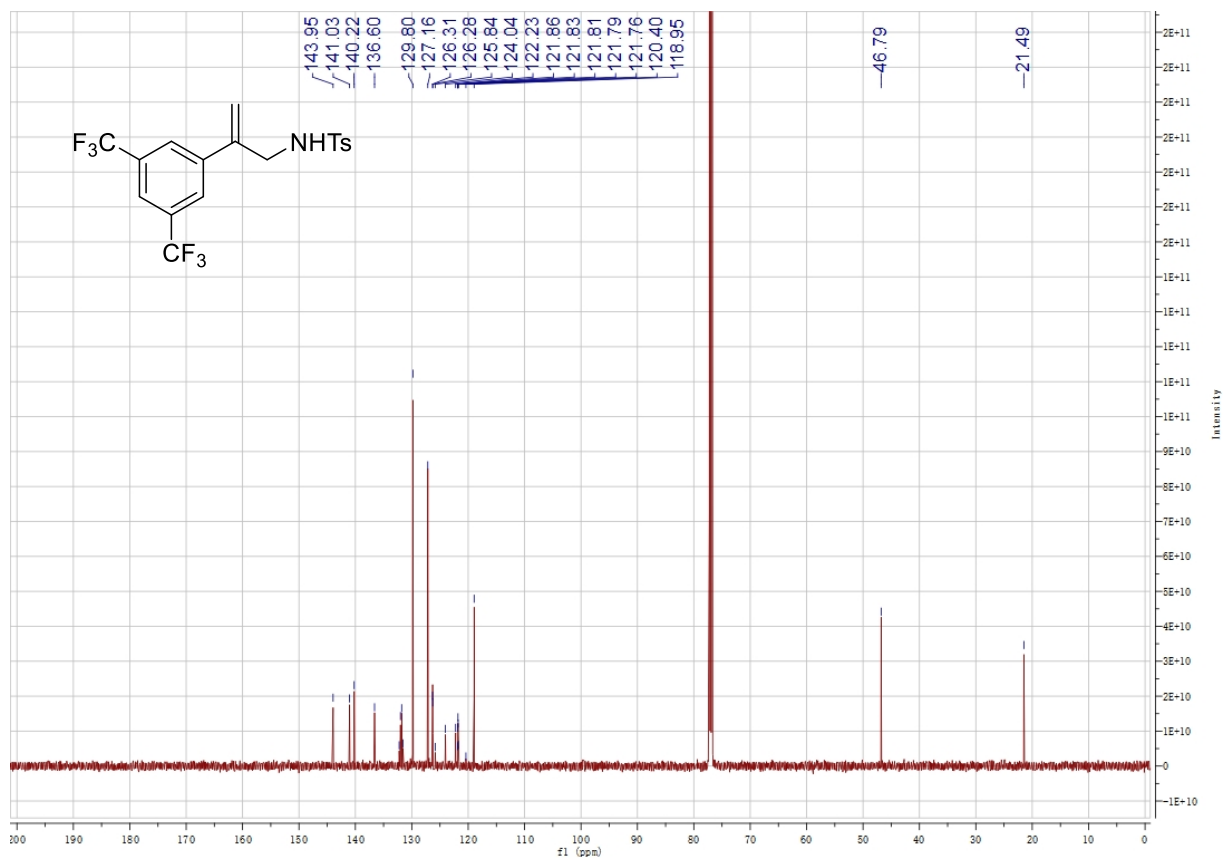

<sup>19</sup>F NMR (565 MHz, 293 K, CDCl<sub>3</sub>)

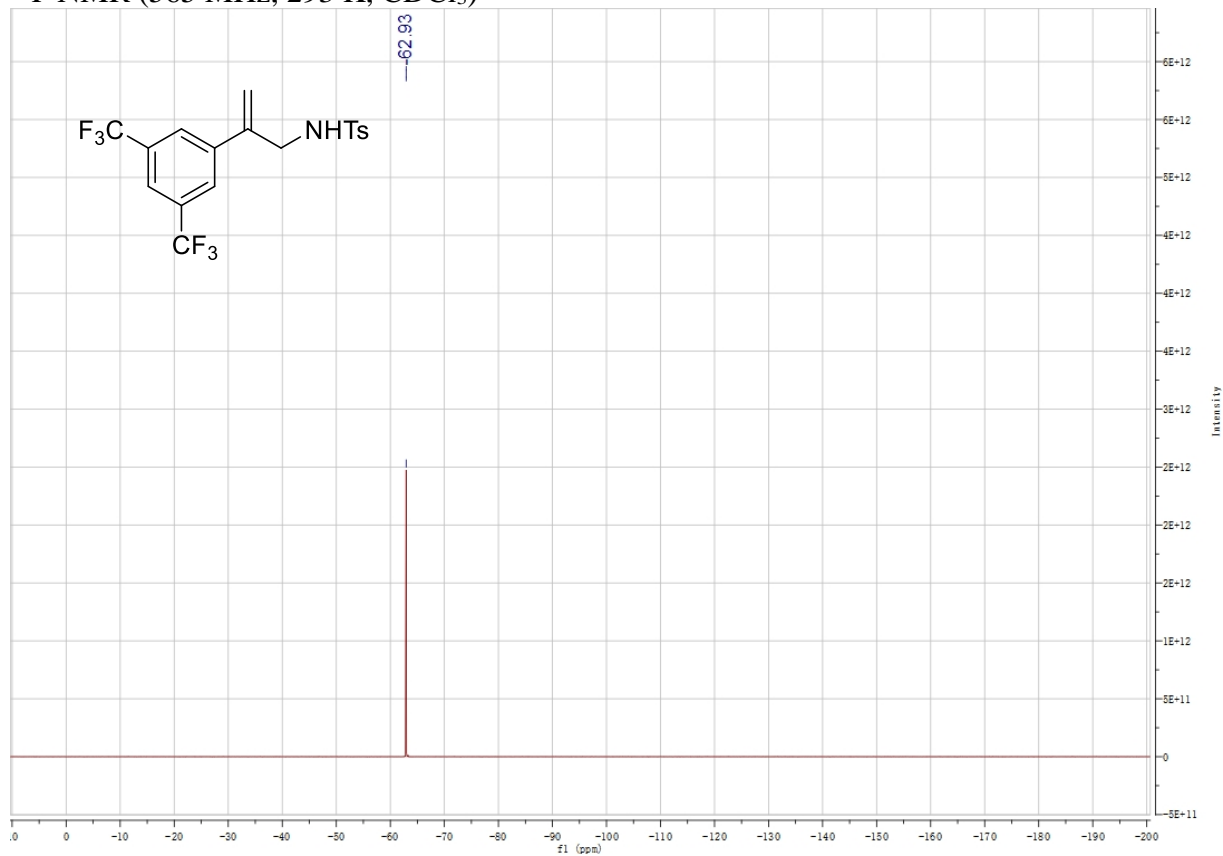



**Supplementary Figure 31. 4-Chloro-N-(2-phenylallyl)benzenesulfonamide (10p)**

$^1\text{H}$  NMR (600 MHz, 293 K,  $\text{CDCl}_3$ )

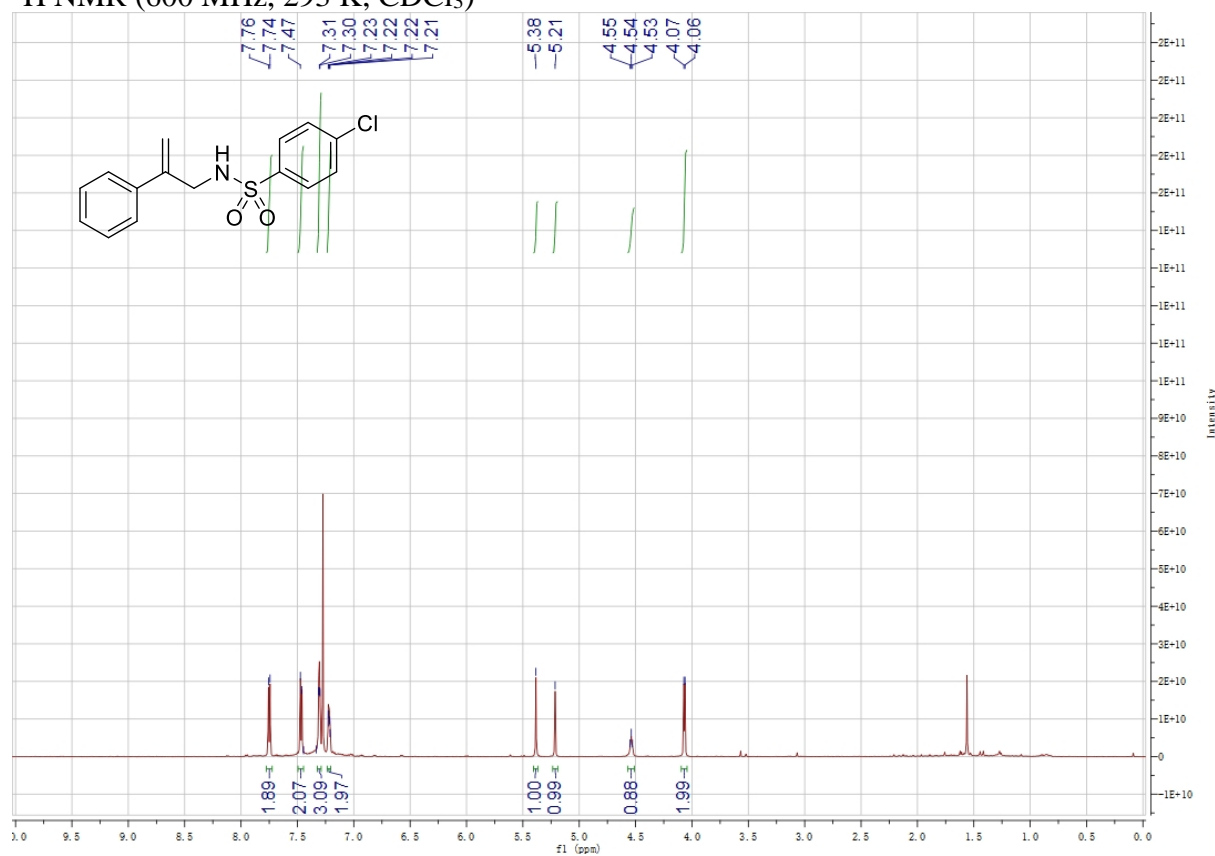

$^{13}\text{C}$  NMR (151 MHz, 293 K,  $\text{CDCl}_3$ )

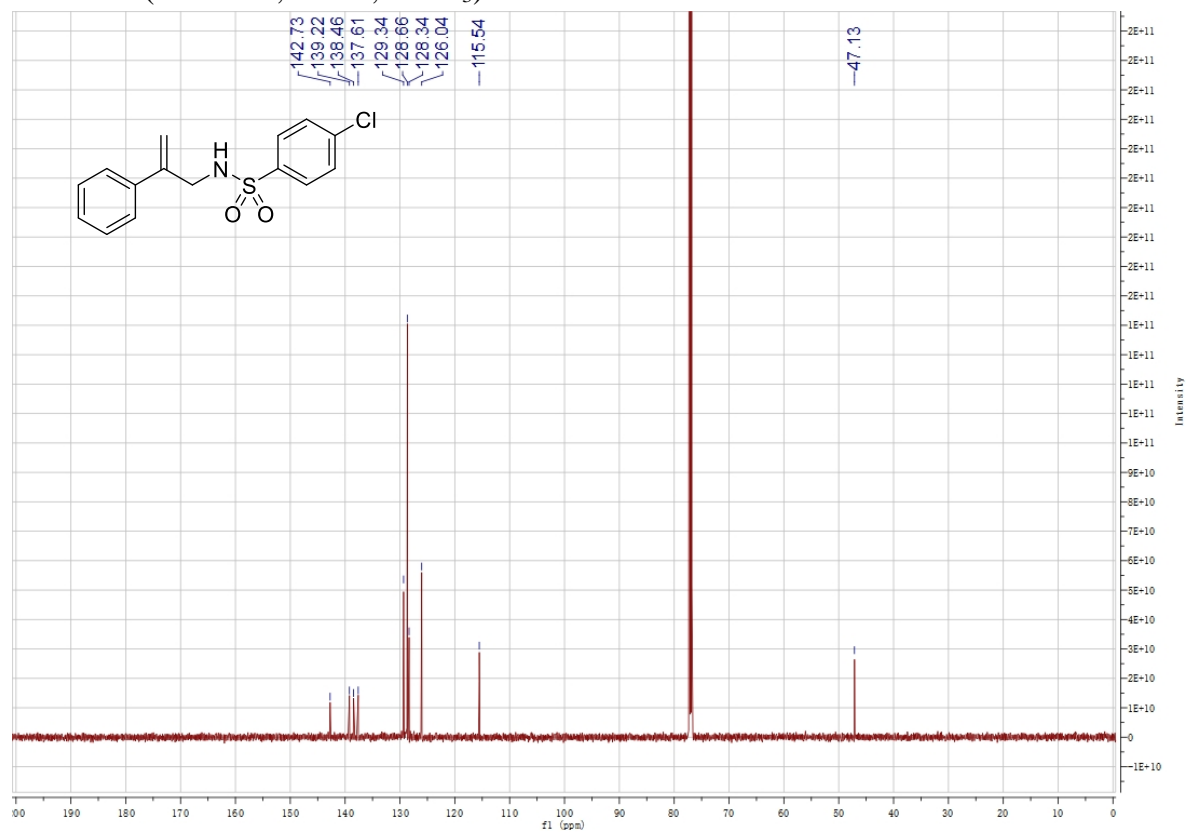

**Supplementary Figure 32. 2-Nitro-N-(2-phenylallyl)benzenesulfonamide (10q)**

$^1\text{H}$  NMR (600 MHz, 293 K,  $\text{CDCl}_3$ )

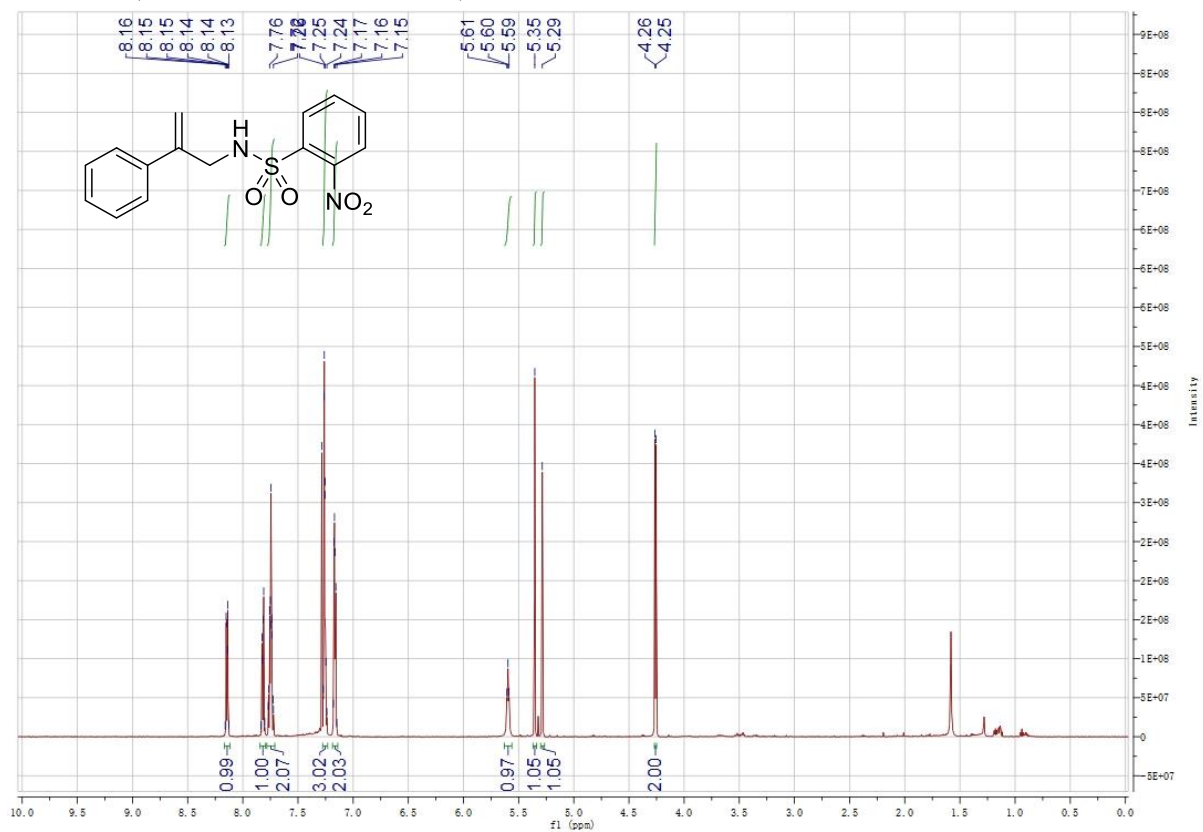

$^{13}\text{C}$  NMR (151 MHz, 293 K,  $\text{CDCl}_3$ )

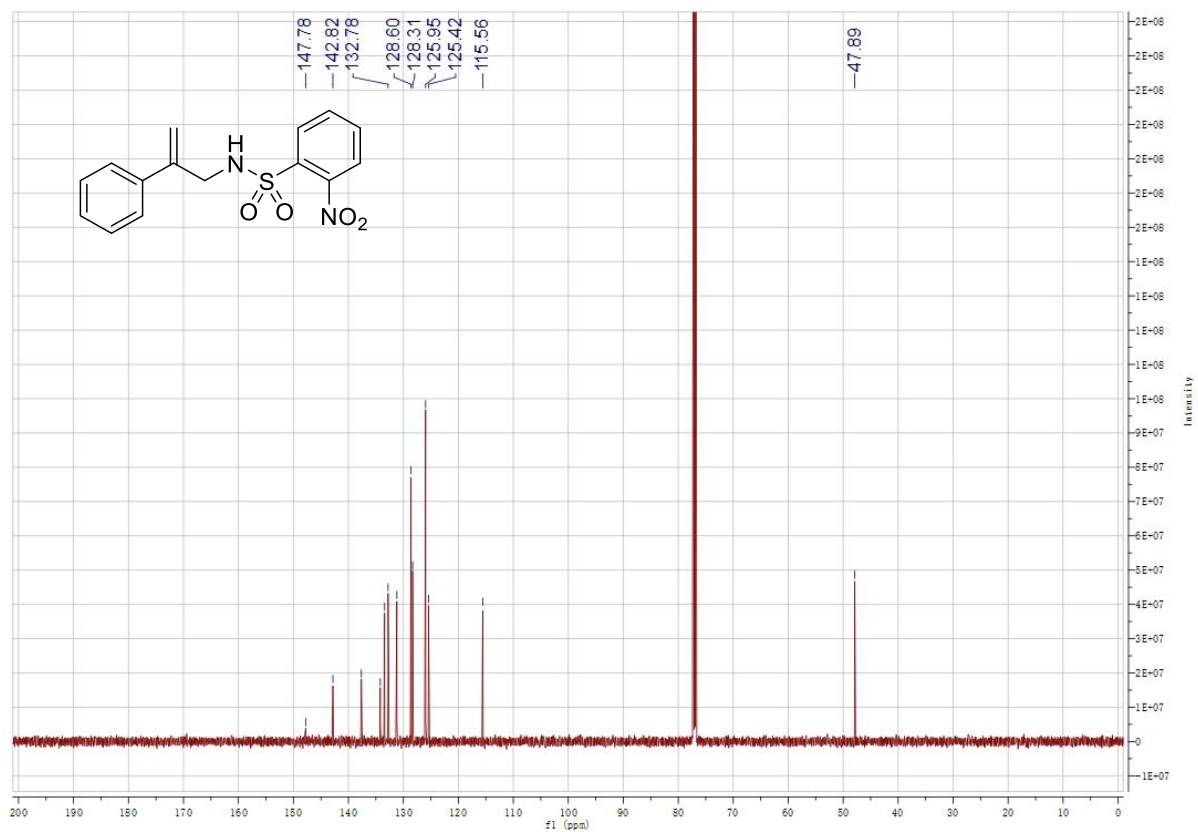

### Supplementary Figure 33.

4-Methyl-N-(2,3,4,5-tetrahydro-[1,1'-biphenyl]-2-yl)benzenesulfonamide (**10r**)

<sup>1</sup>H NMR (600 MHz, 293 K, CDCl<sub>3</sub>)

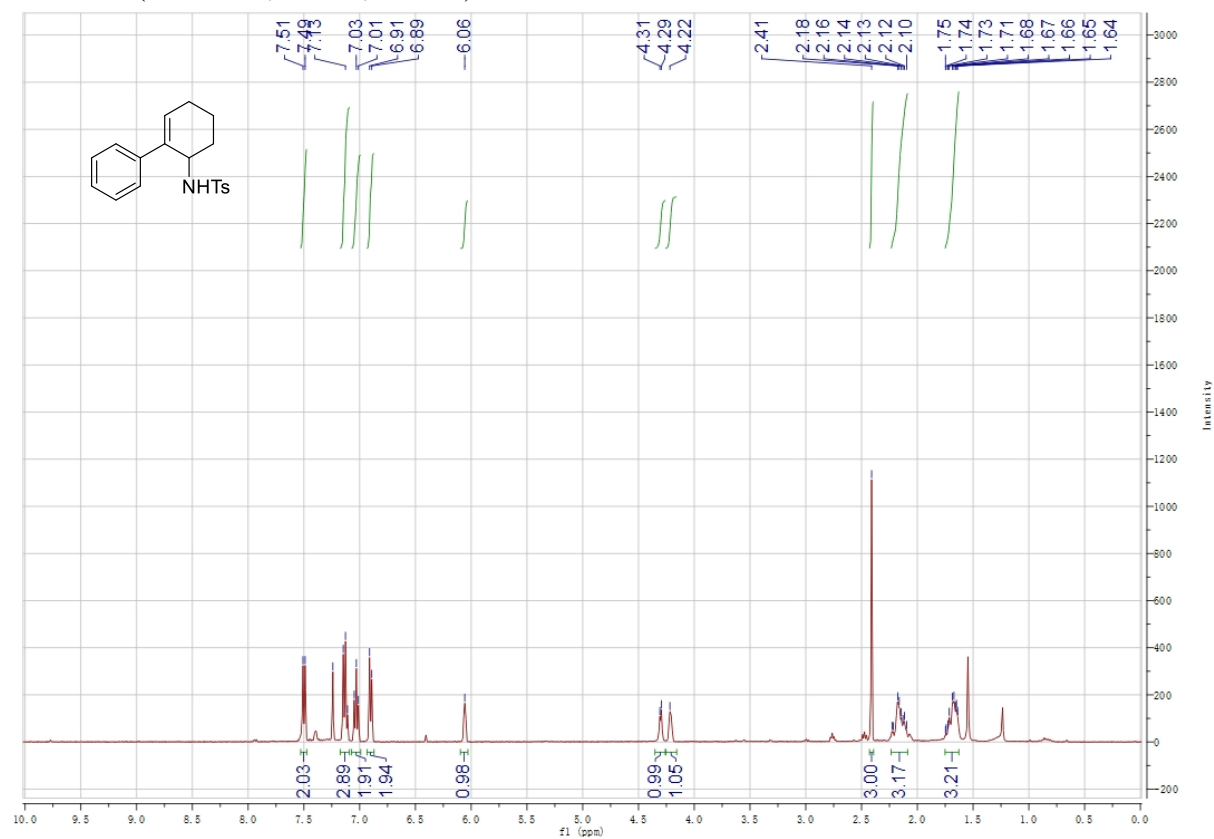

<sup>13</sup>C NMR (151 MHz, 293 K, CDCl<sub>3</sub>)

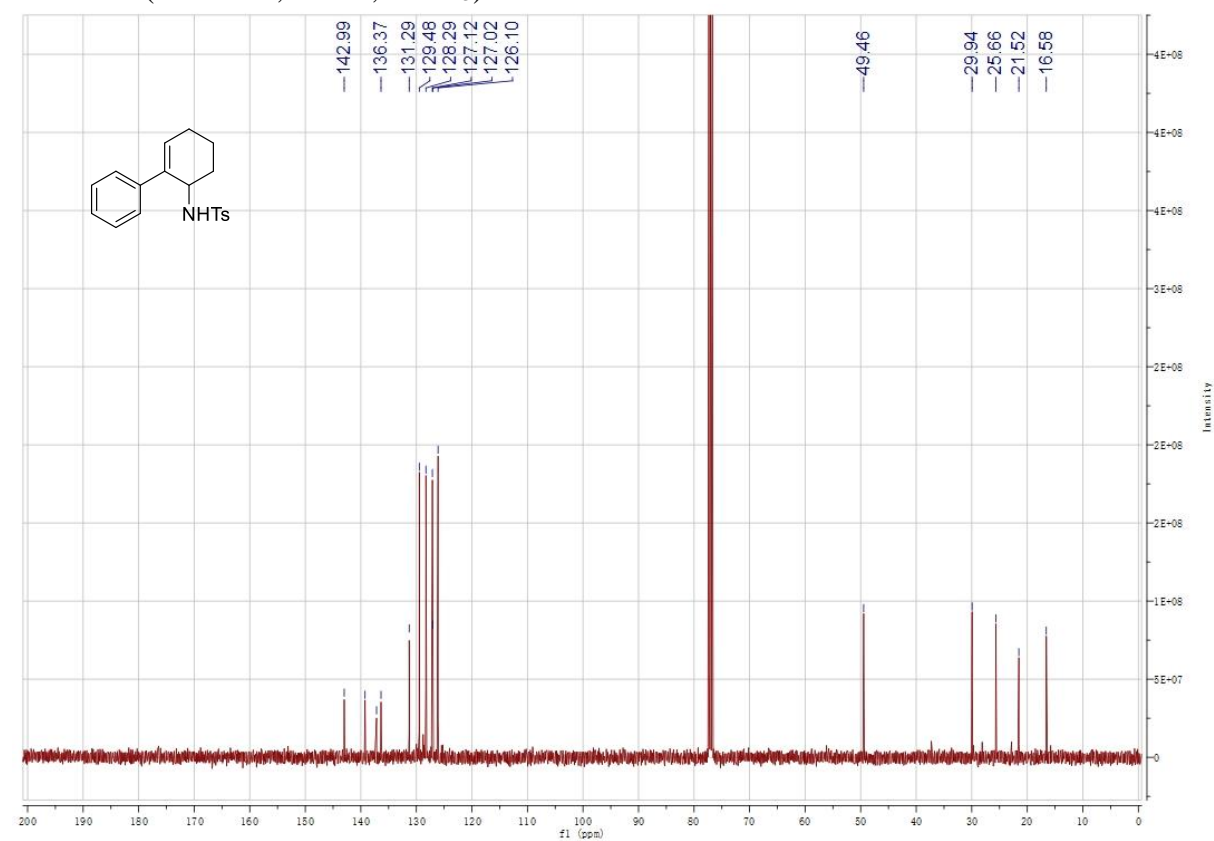

**Supplementary Figure 34.** 4-Methyl-N-(2-methylcyclopent-2-en-1-yl)benzenesulfonamide (10s)

<sup>1</sup>H NMR (600 MHz, 293 K, CDCl<sub>3</sub>)

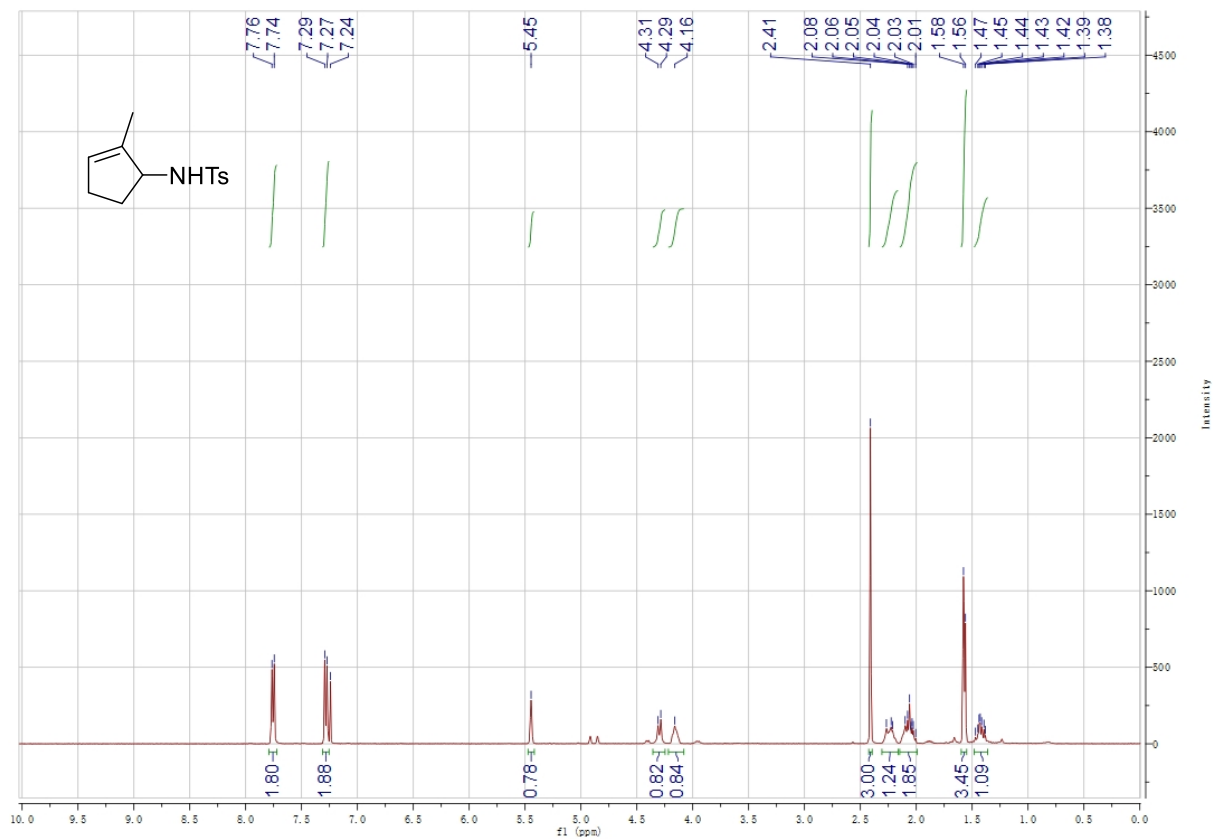

<sup>13</sup>C NMR (151 MHz, 293 K, CDCl<sub>3</sub>)

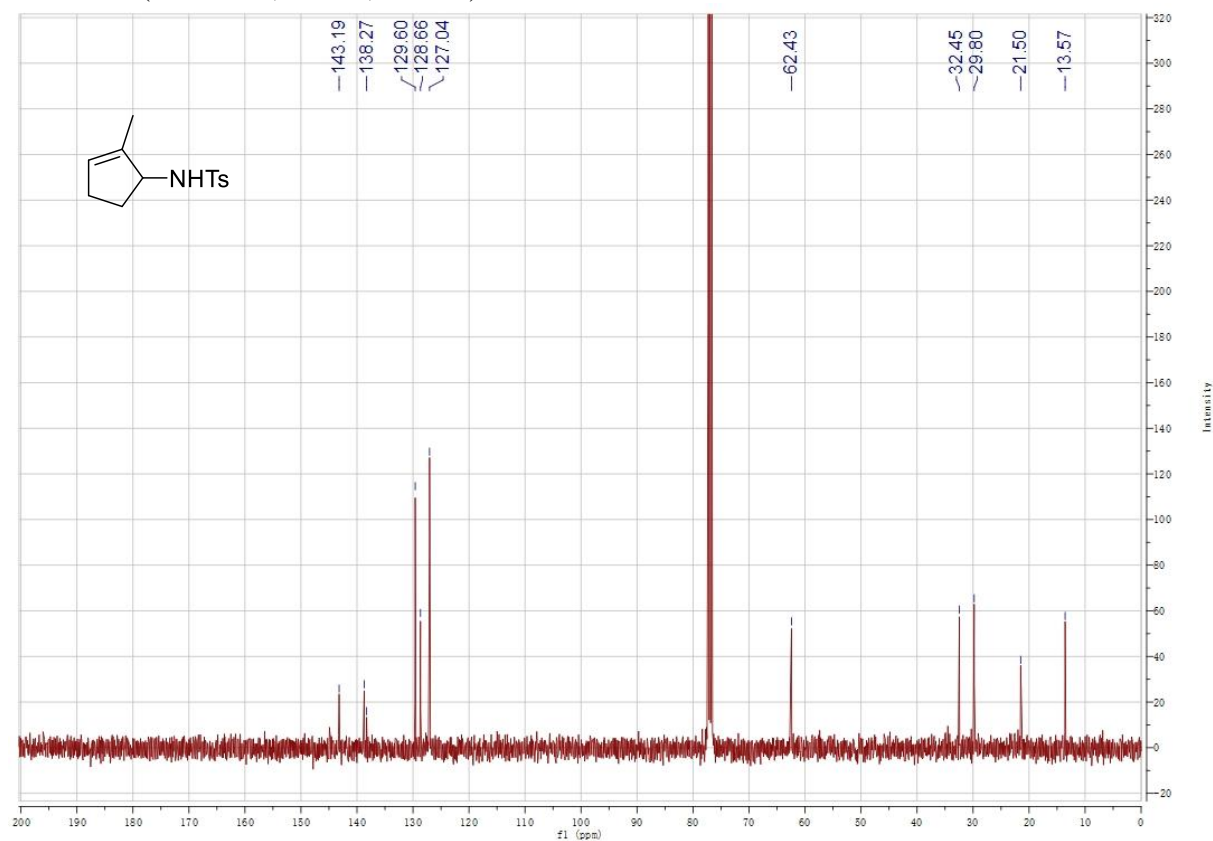

**Supplementary Figure 35.**

*4-Methyl-N-(2-methylene-4-phenylbut-3-yn-1-yl)benzenesulfonamide (10t)*

$^1\text{H NMR}$  (600 MHz, 293 K,  $\text{CDCl}_3$ )

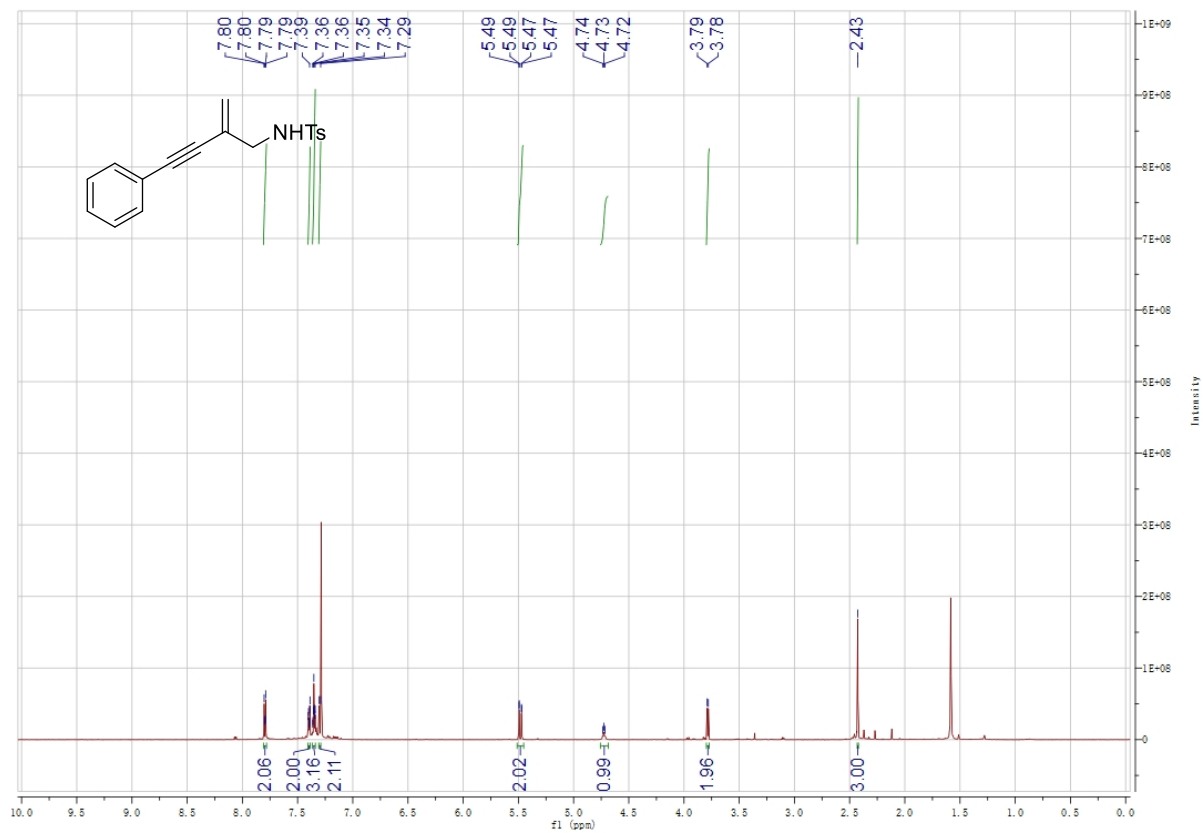

$^{13}\text{C NMR}$  (151 MHz, 293 K,  $\text{CDCl}_3$ )

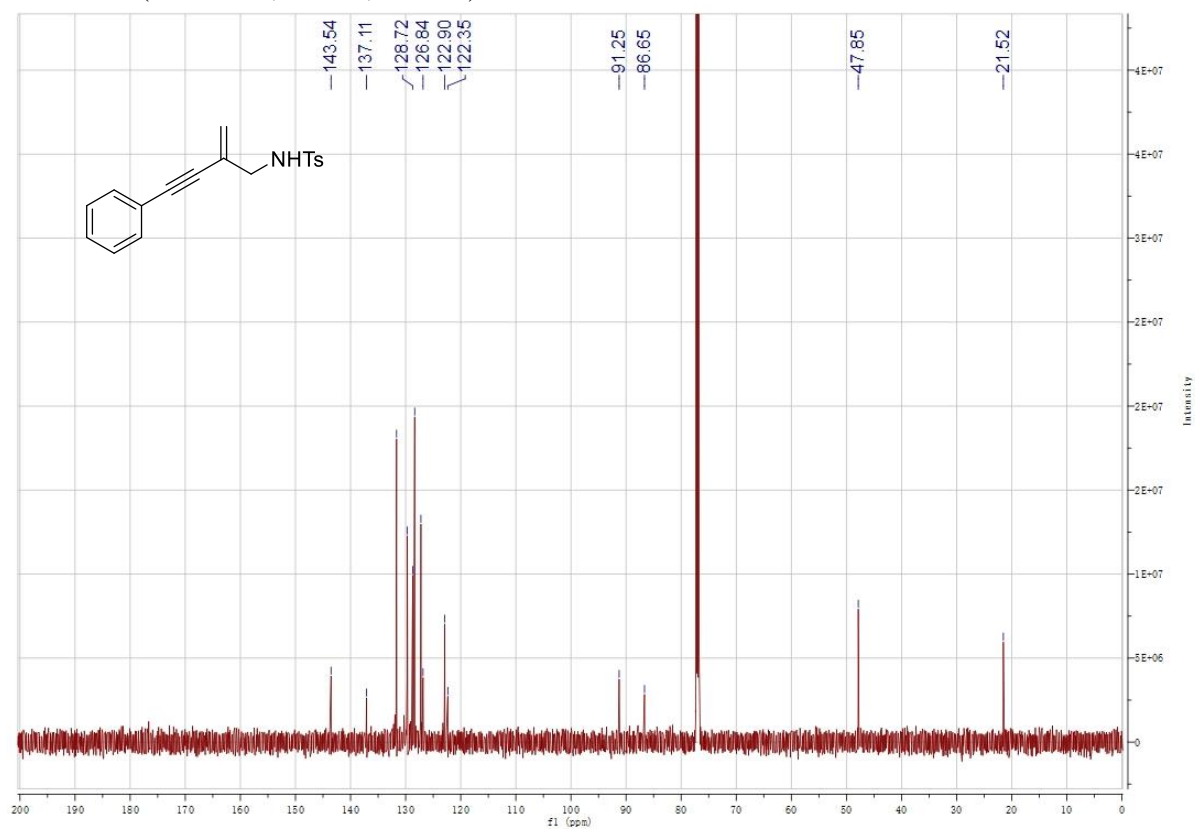

**Supplementary Figure 36.** *N*-(2-Cyclohexylallyl)-4-methylbenzenesulfonamide (**10u**)  
<sup>1</sup>H NMR (600 MHz, 293 K, CDCl<sub>3</sub>)

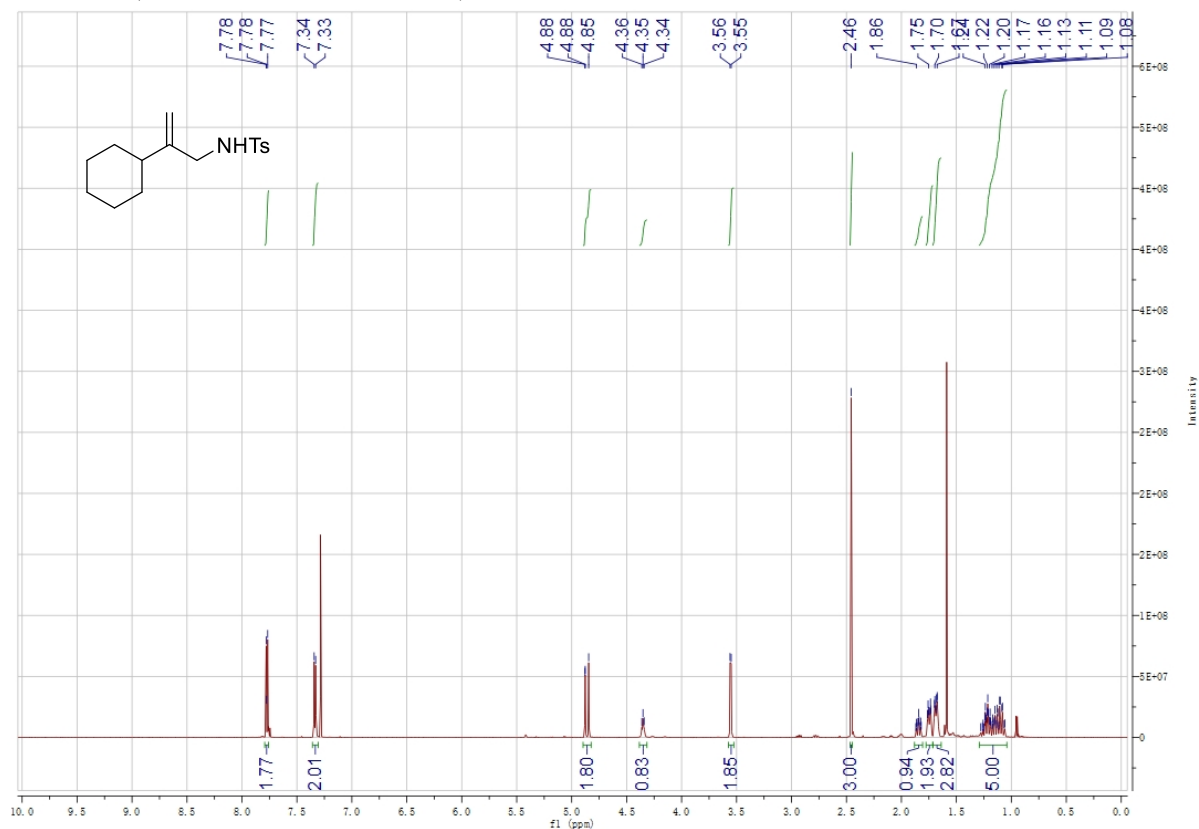

<sup>13</sup>C NMR (151 MHz, 293 K, CDCl<sub>3</sub>)

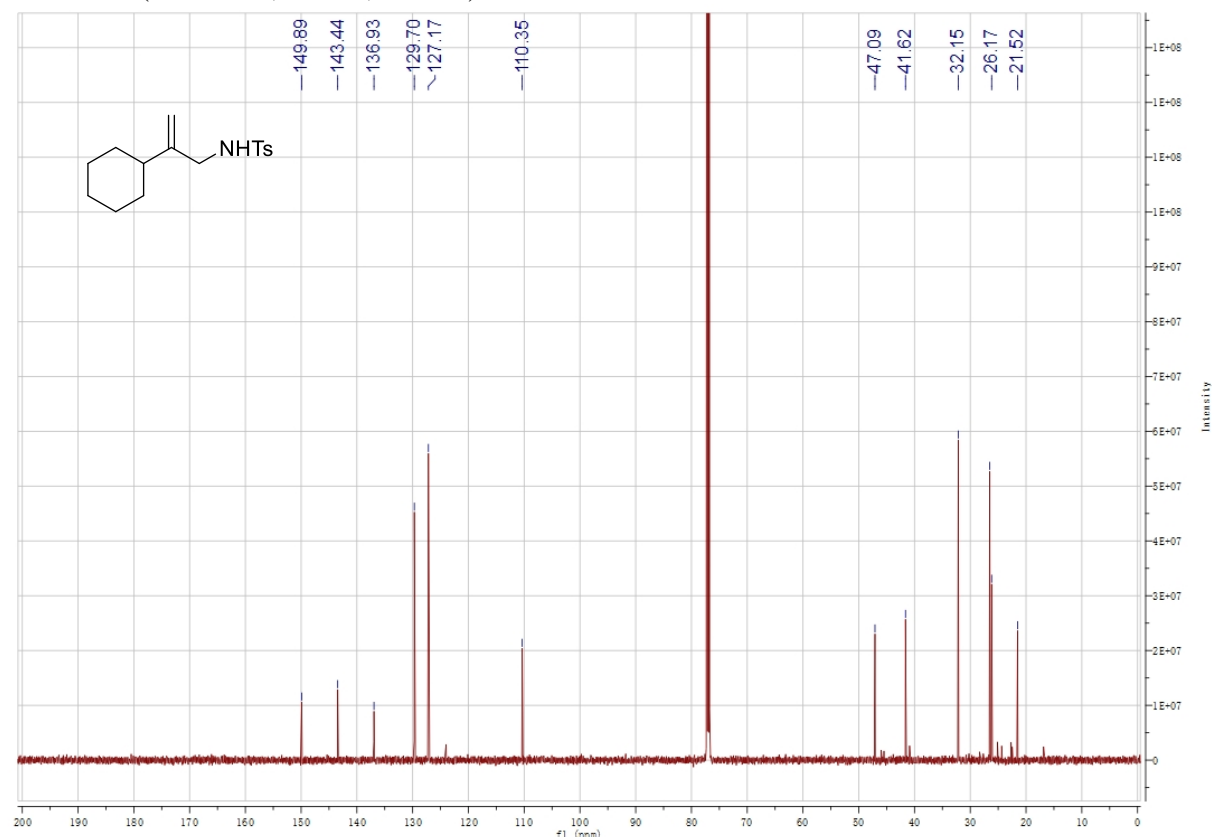

**Supplementary Figure 37.** *N*-(3,3-Dimethyl-2-methylenebutyl)-4-methylbenzenesulfonamide (*10v*)

$^1\text{H}$  NMR (400 MHz, 293 K,  $\text{CDCl}_3$ )

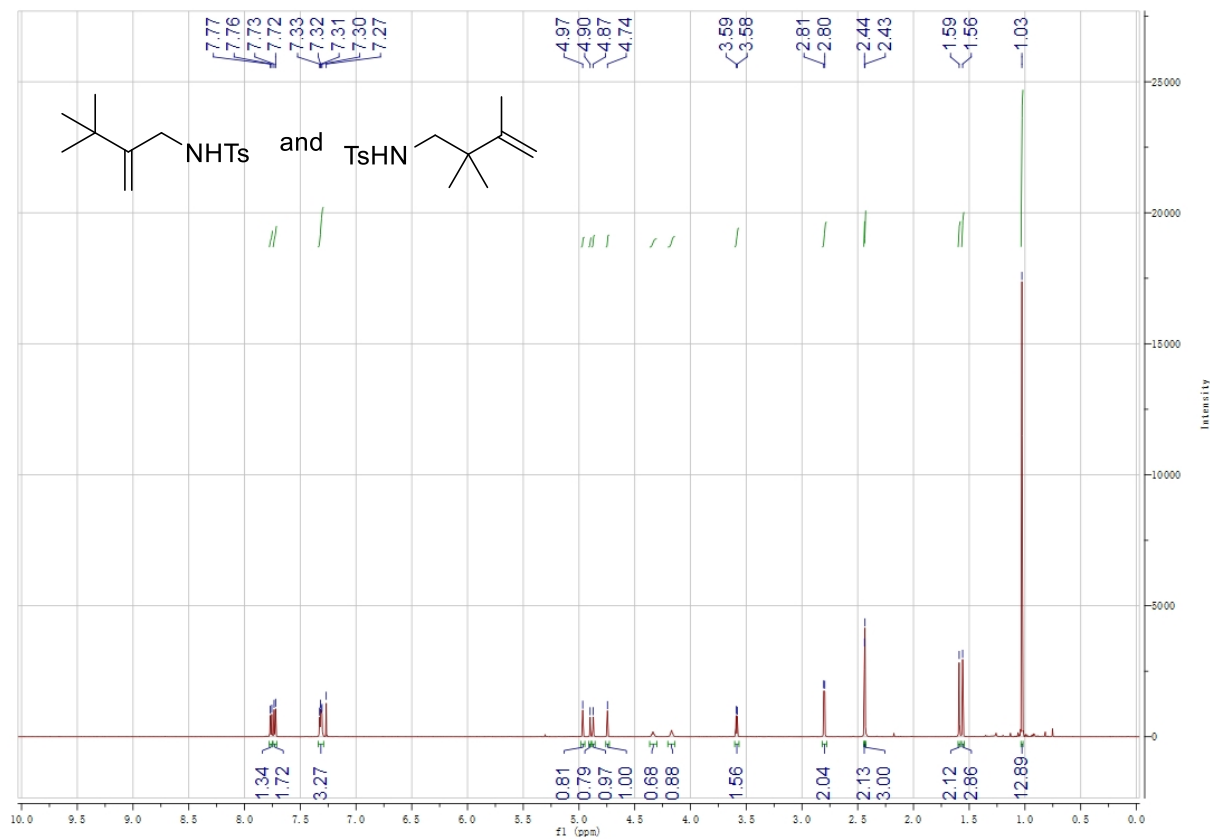

$^{13}\text{C}$  NMR (101 MHz, 293 K,  $\text{CDCl}_3$ )

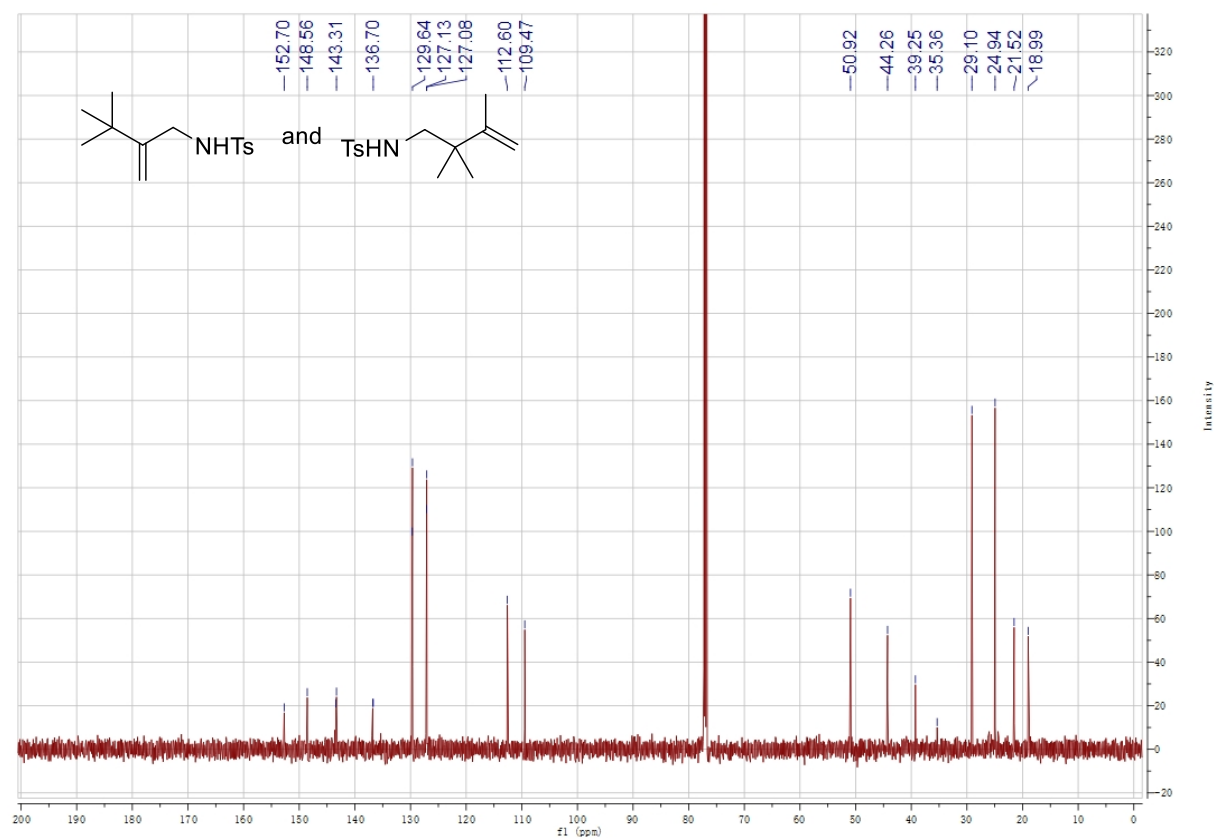

**Supplementary Figure 38. 2-Methyl-2-phenyl-1-tosylaziridine (11a)**

<sup>1</sup>H NMR (400 MHz, 293 K, CDCl<sub>3</sub>)

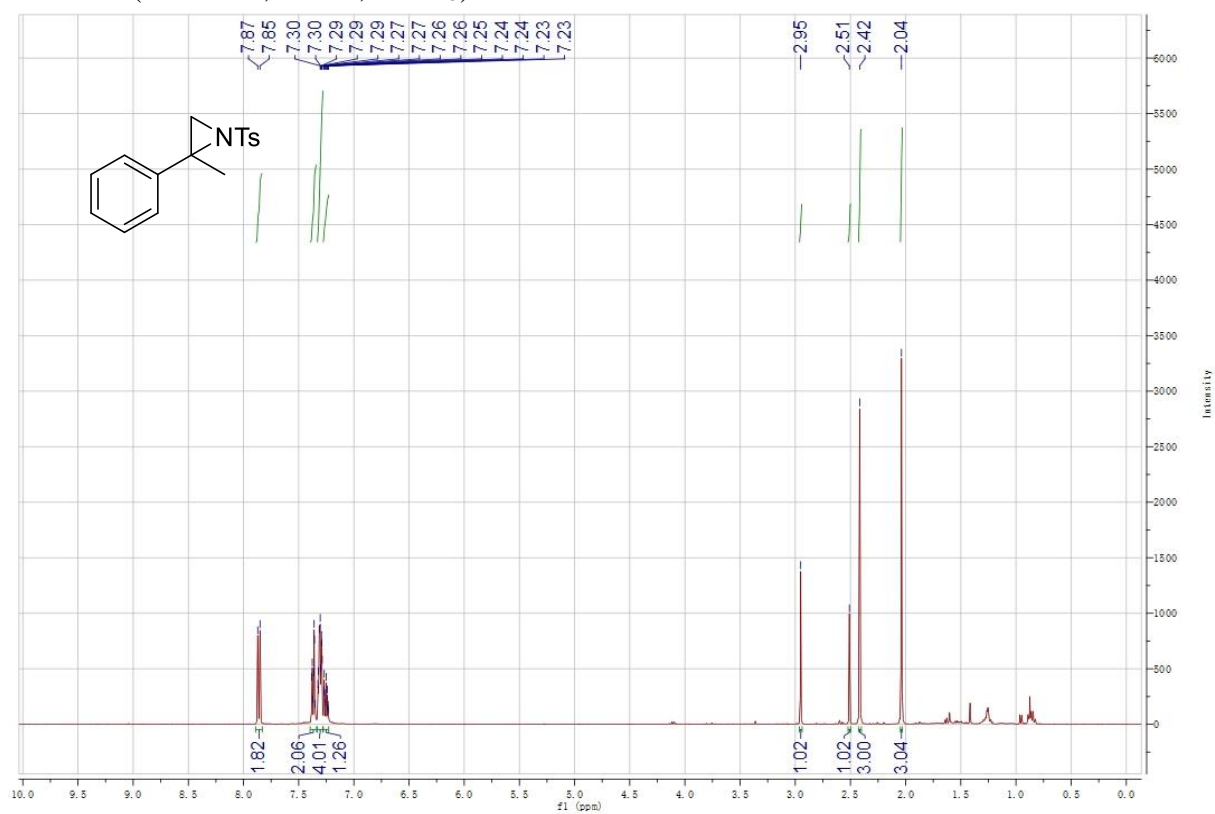

<sup>13</sup>C NMR (101 MHz, 293 K, CDCl<sub>3</sub>)

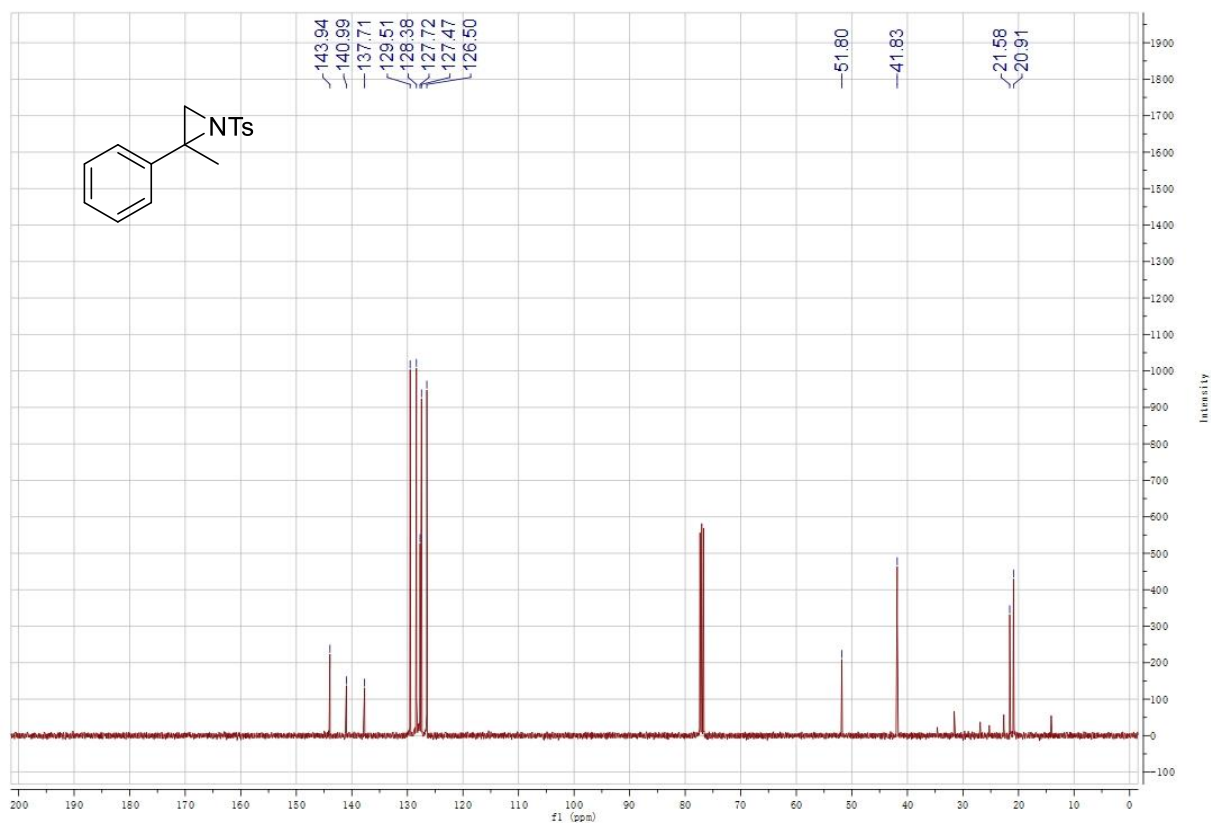



**Supplementary Figure 39. 2-(Methyl-d3)-2-phenyl-1-tosylaziridine (11a-d3)**

$^1\text{H}$  NMR (400 MHz, 293 K,  $\text{CDCl}_3$ )

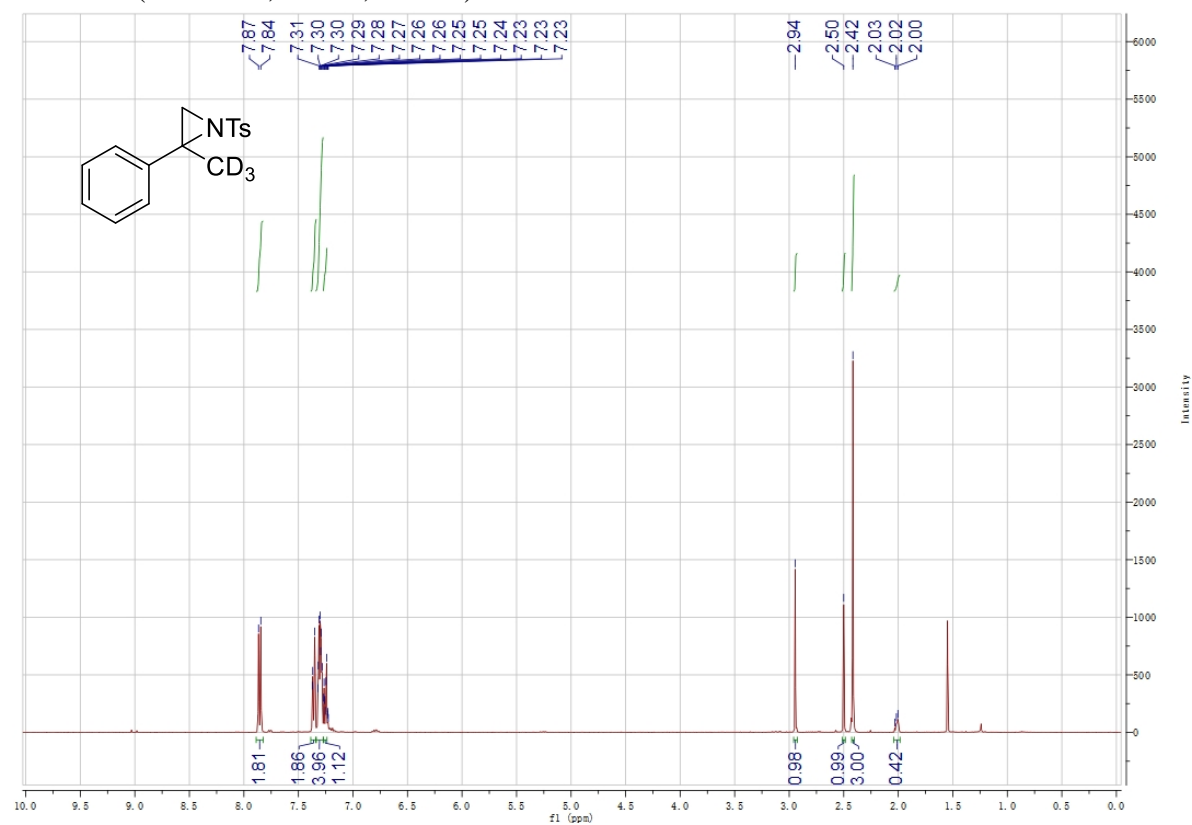

$^{13}\text{C}$  NMR (101 MHz, 293 K,  $\text{CDCl}_3$ )

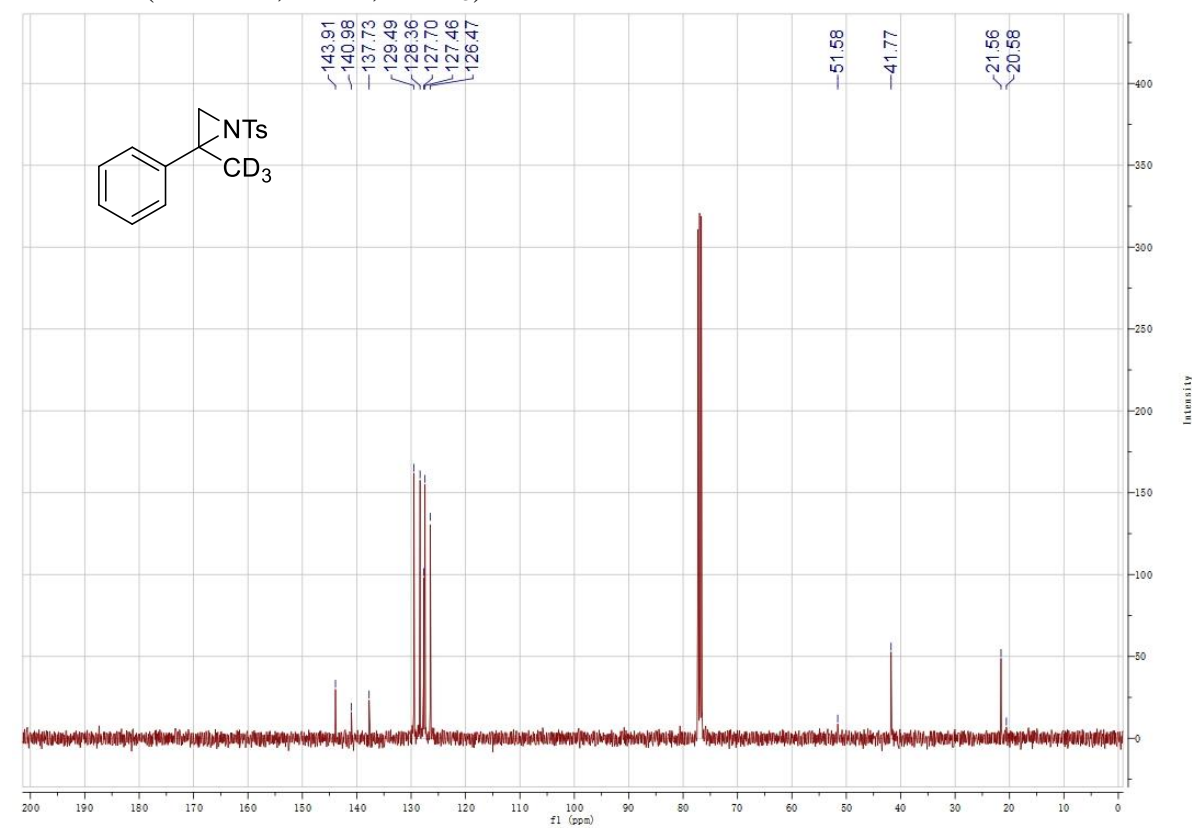

**Supplementary Figure 40. 2-(4-Chlorophenyl)-2-methyl-1-tosylaziridine (**11b**)**

$^1\text{H}$  NMR (400 MHz, 293 K,  $\text{CDCl}_3$ )

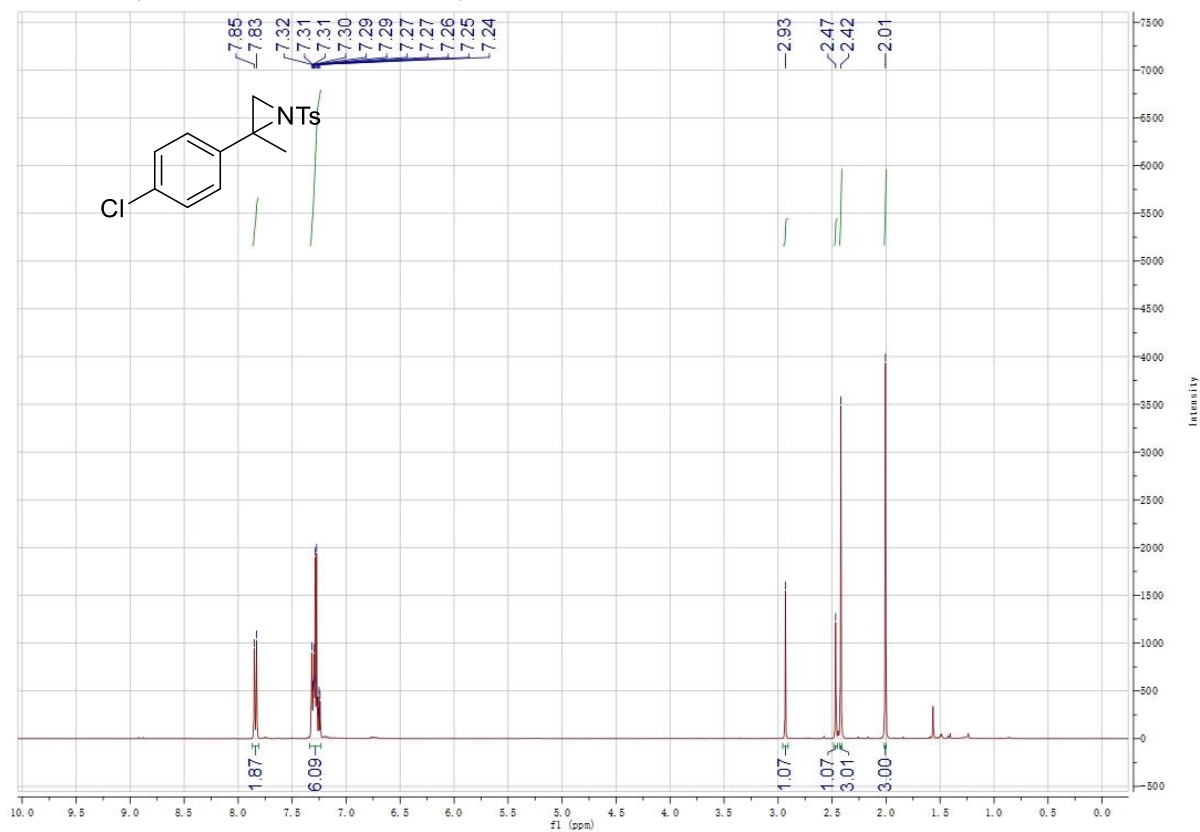

$^{13}\text{C}$  NMR (101 MHz, 293 K,  $\text{CDCl}_3$ )

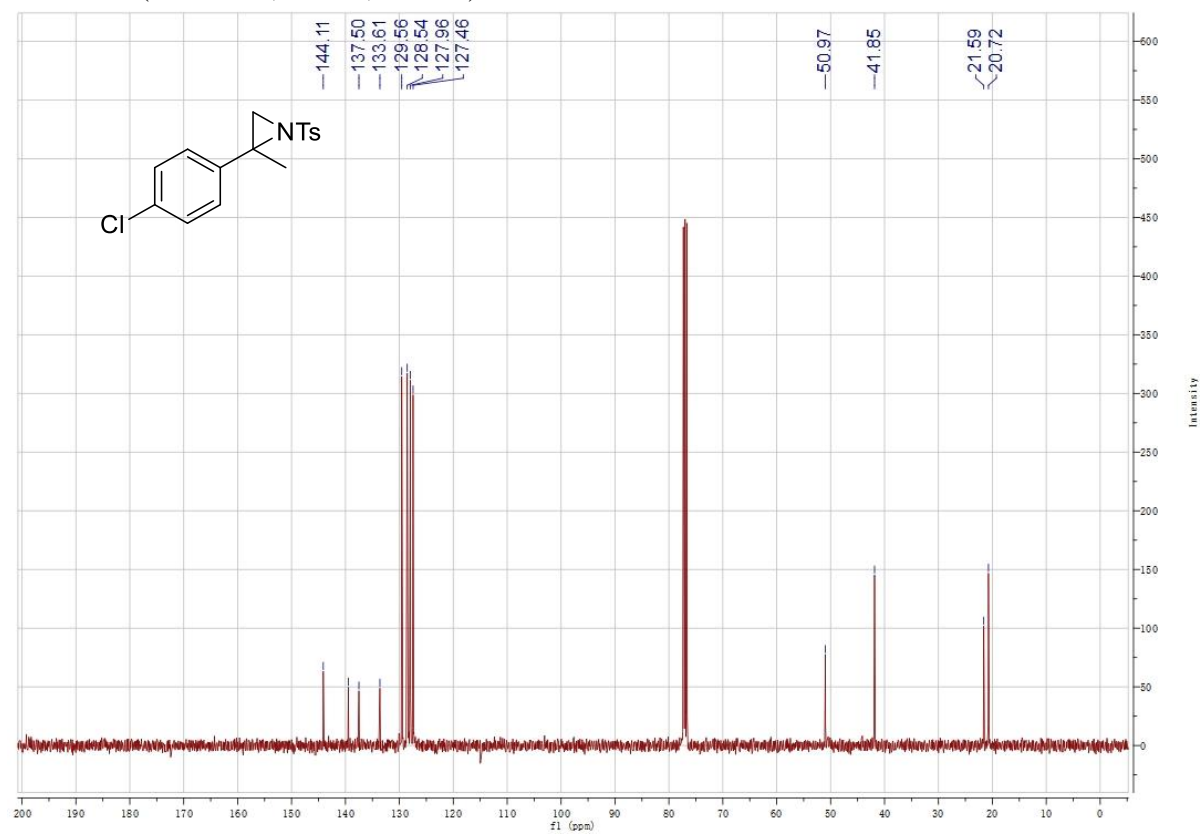

**Supplementary Figure 41. 2-(4-Bromophenyl)-2-methyl-1-tosylaziridine (**11c**)**

<sup>1</sup>H NMR (400 MHz, 293 K, CDCl<sub>3</sub>)

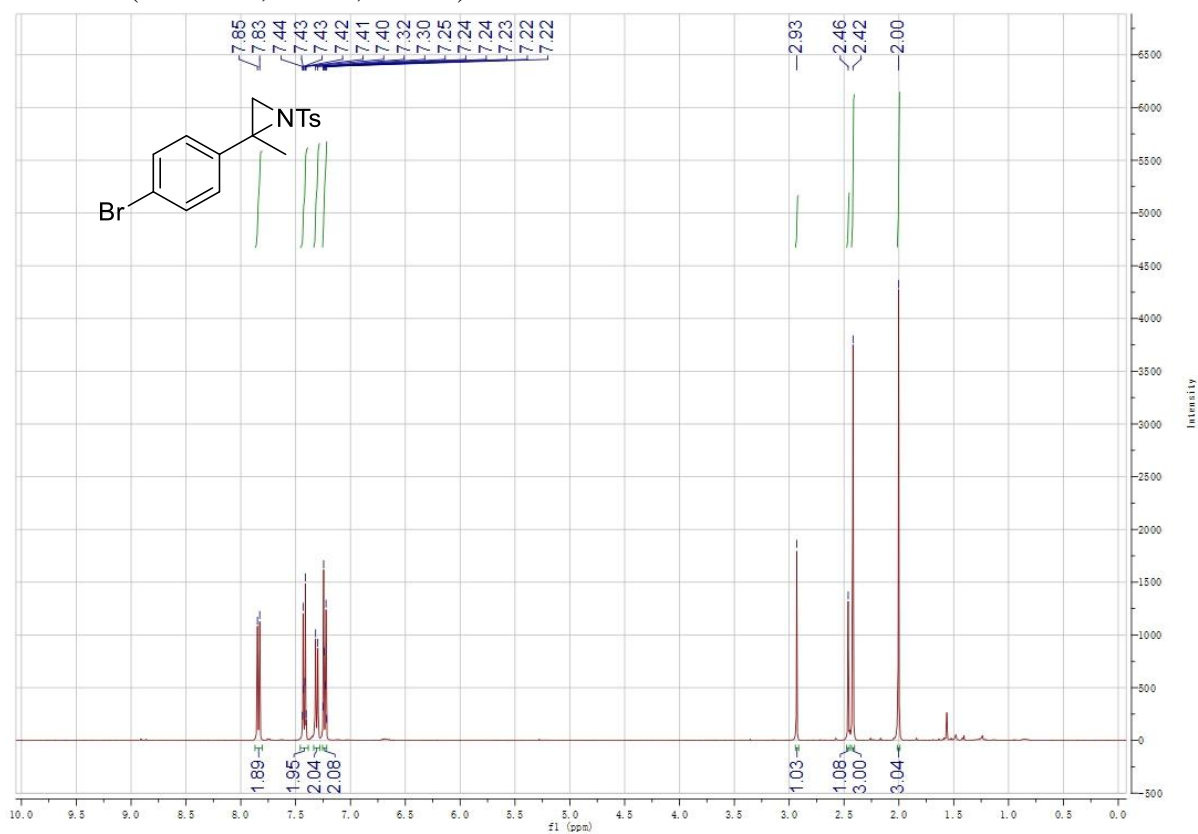

<sup>13</sup>C NMR (101 MHz, 293 K, CDCl<sub>3</sub>)

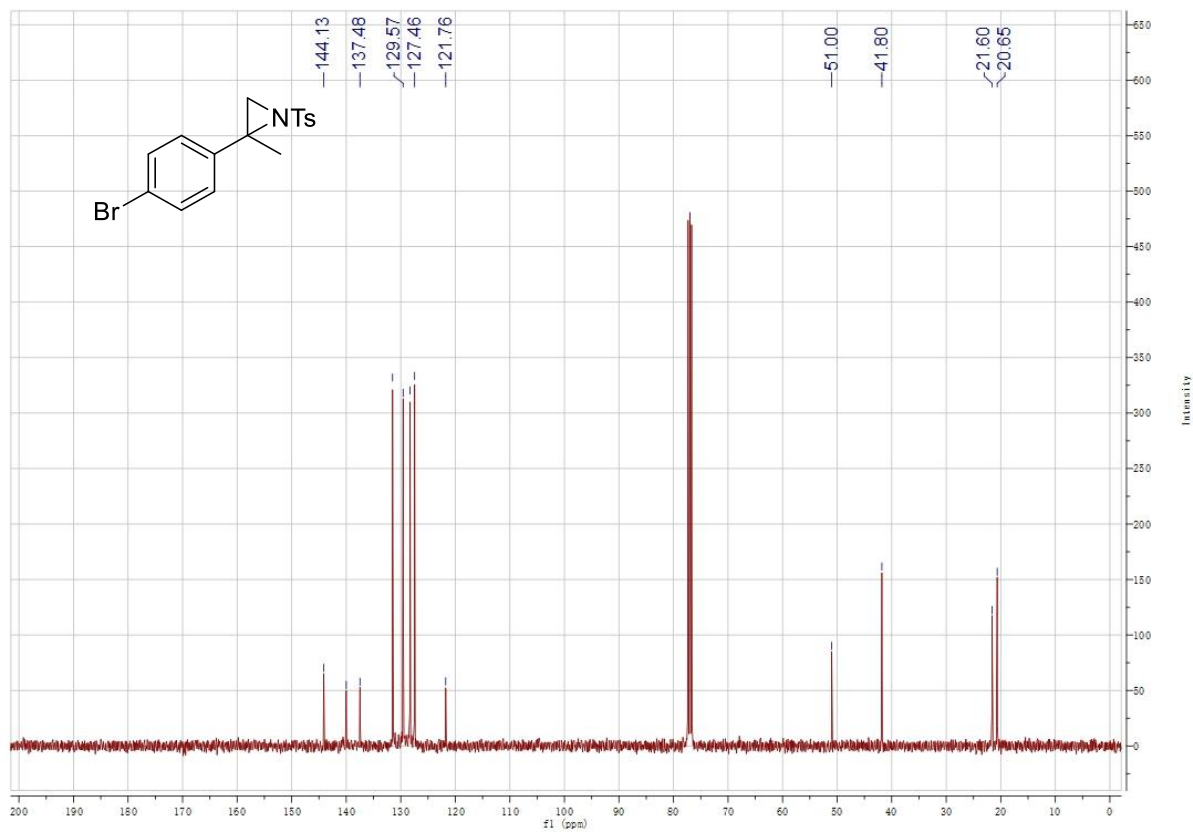

**Supplementary Figure 42.** 4-(2-Methyl-1-tosylaziridin-2-yl)benzonitrile (**11d**)

$^1\text{H}$  NMR (400 MHz, 293 K,  $\text{CDCl}_3$ )

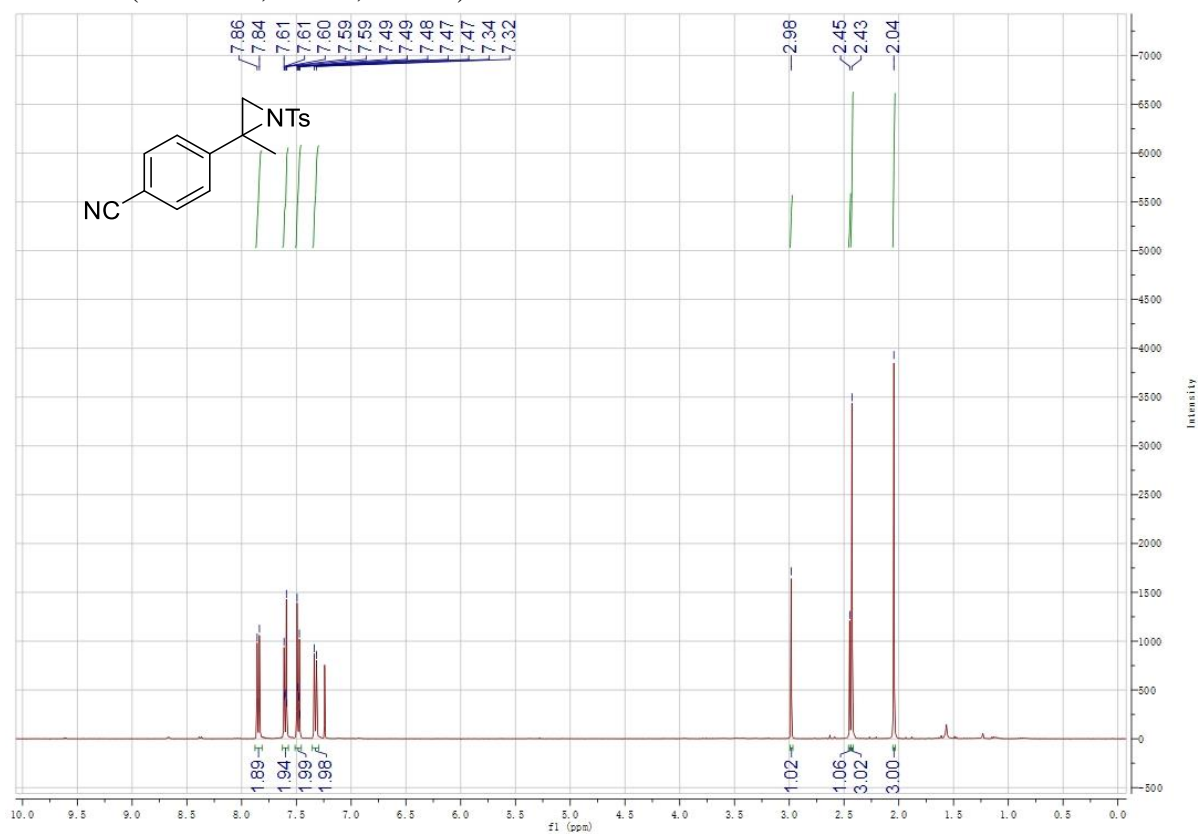

$^{13}\text{C}$  NMR (101 MHz, 293 K,  $\text{CDCl}_3$ )

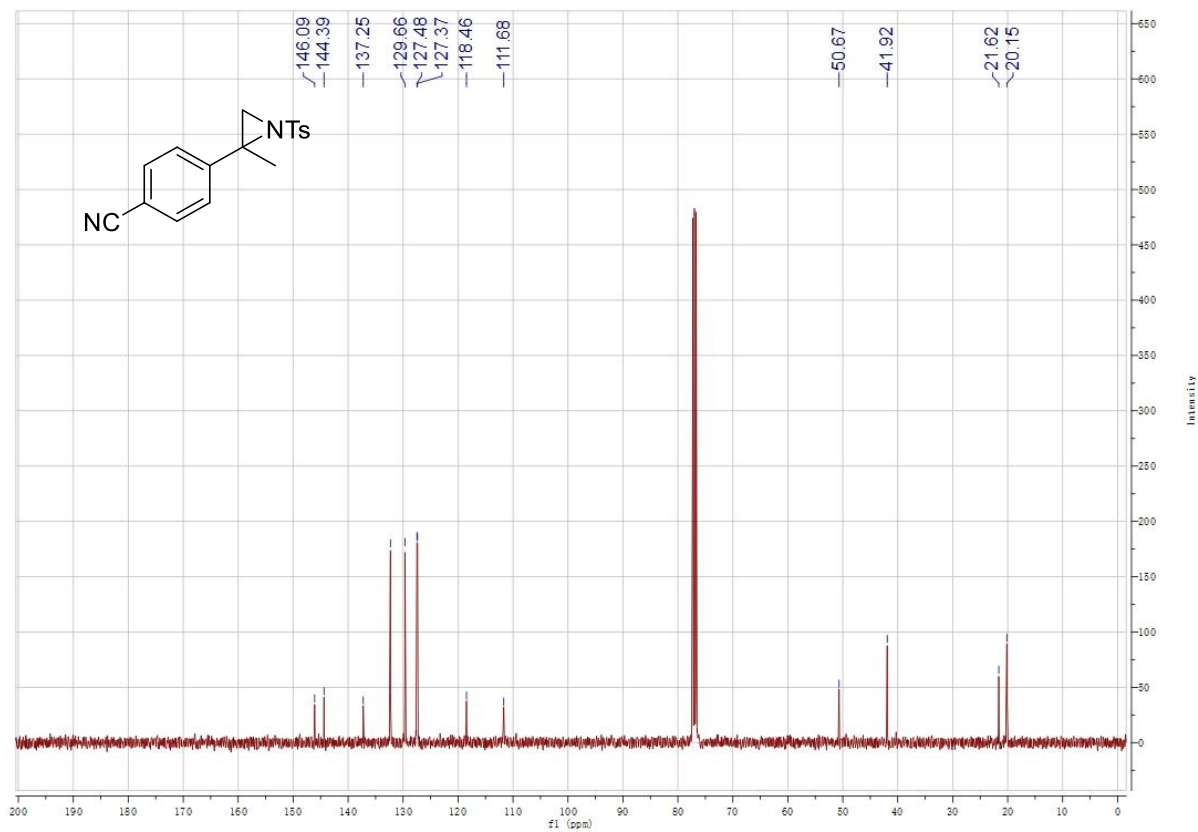

**Supplementary Figure 43. 2-(3-Fluorophenyl)-2-methyl-1-tosylaziridine (11e)**

$^1\text{H}$  NMR (400 MHz, 293 K,  $\text{CDCl}_3$ )

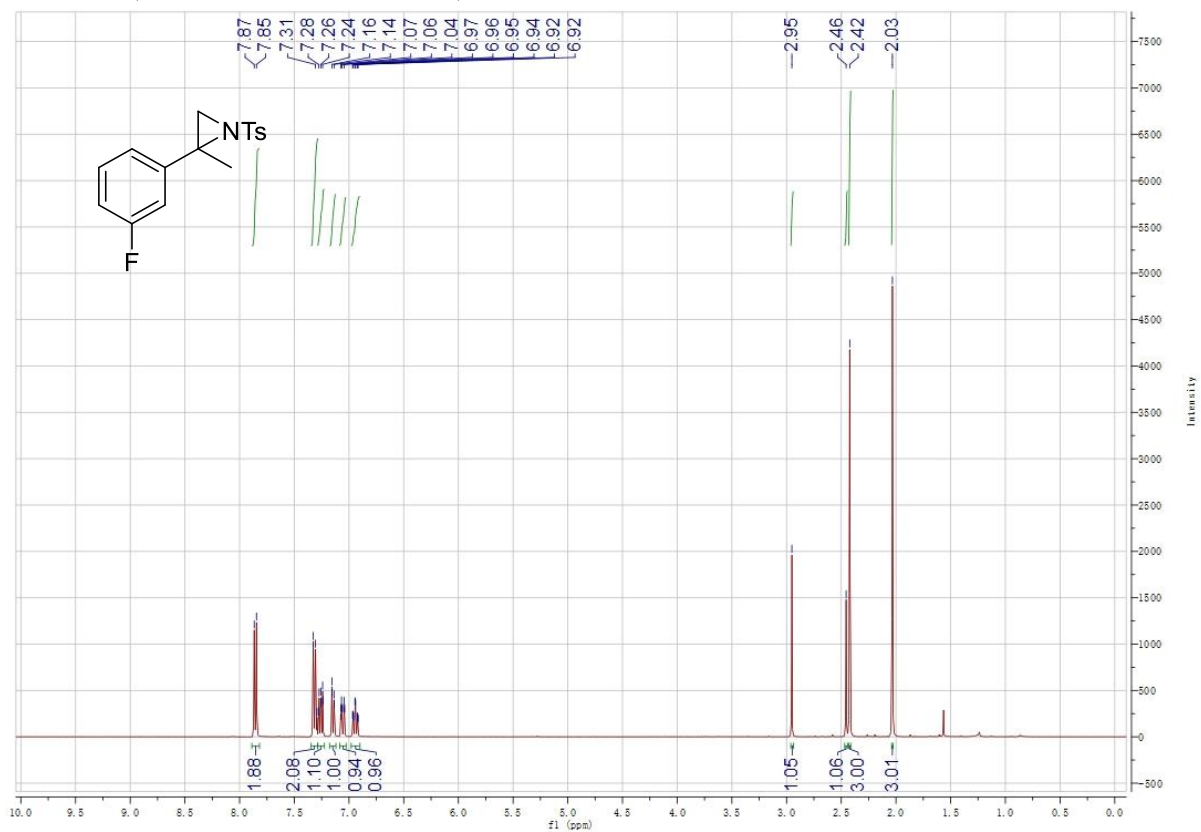

$^{13}\text{C}$  NMR (101 MHz, 293 K,  $\text{CDCl}_3$ )

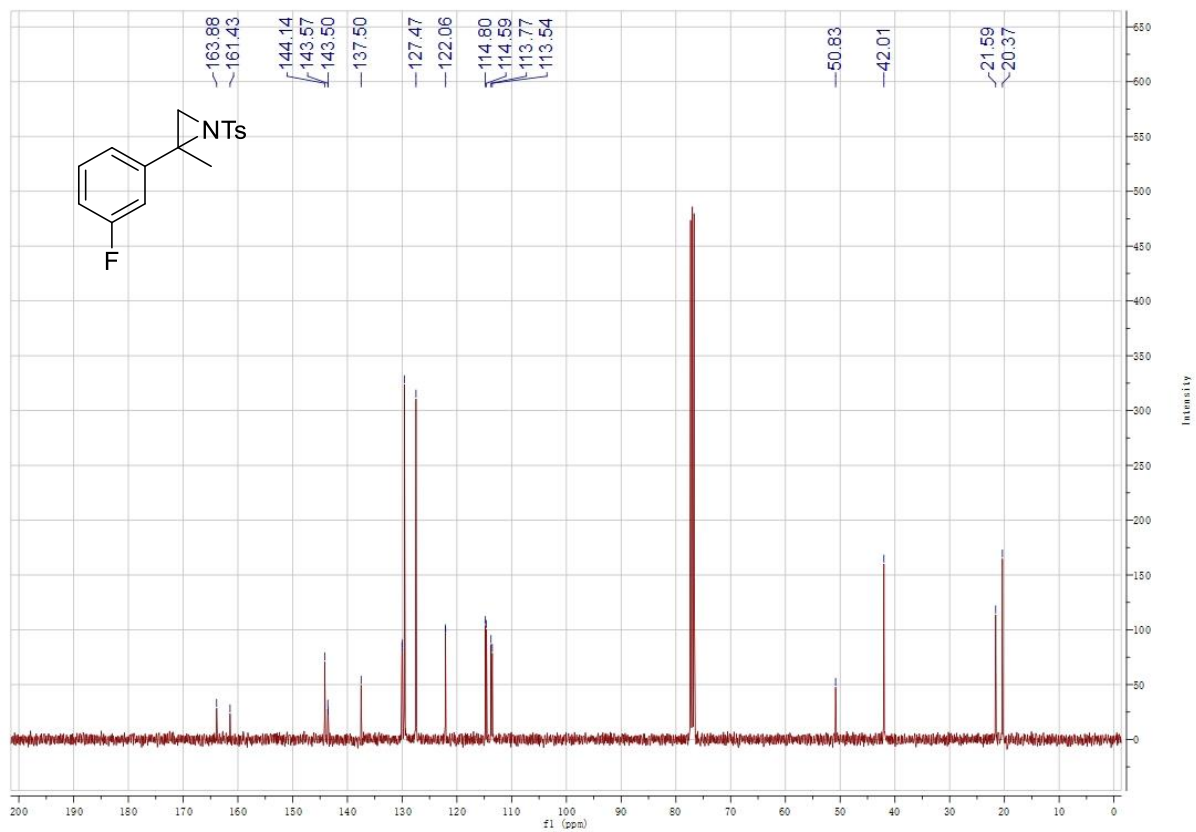

$^{19}\text{F}$  NMR (376 MHz, 293 K,  $\text{CDCl}_3$ )

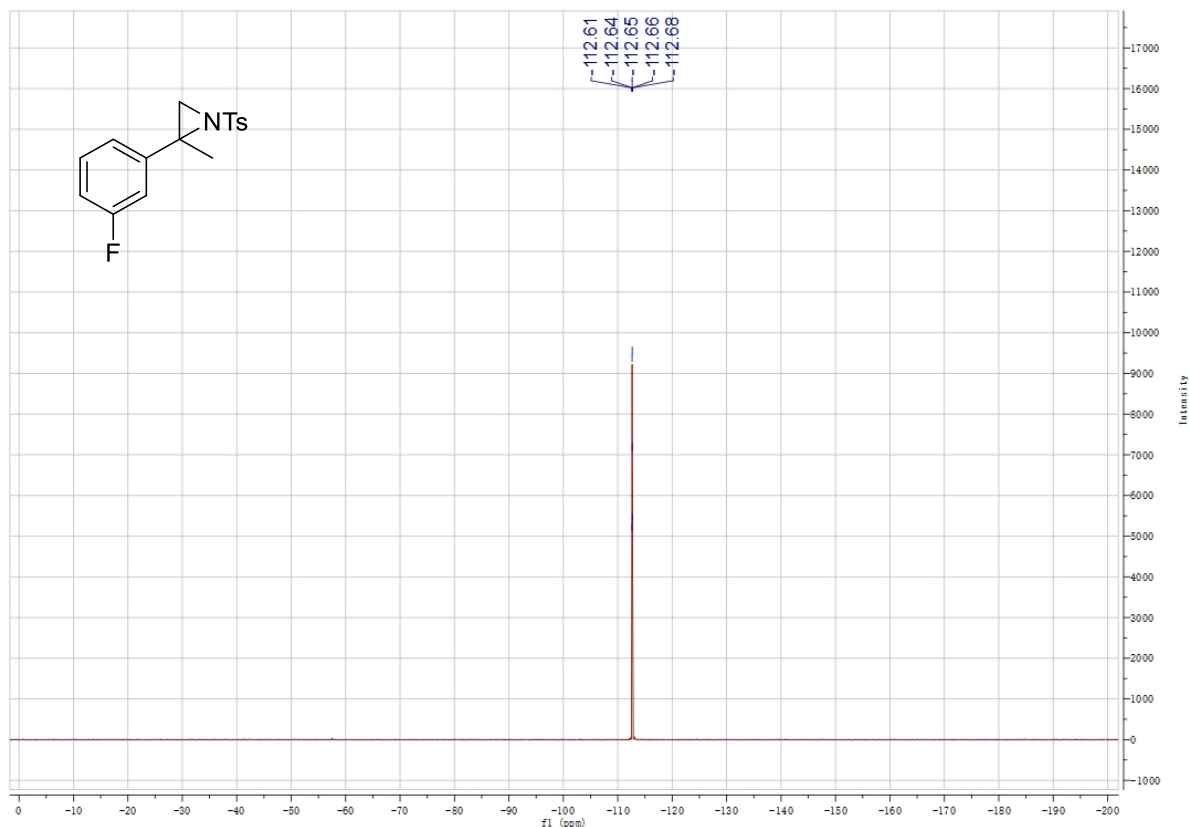

**Supplementary Figure 44. 2-Methyl-2-(*m*-tolyl)-1-tosylaziridine (11f)**

$^1\text{H}$  NMR (400 MHz, 293 K,  $\text{CDCl}_3$ )

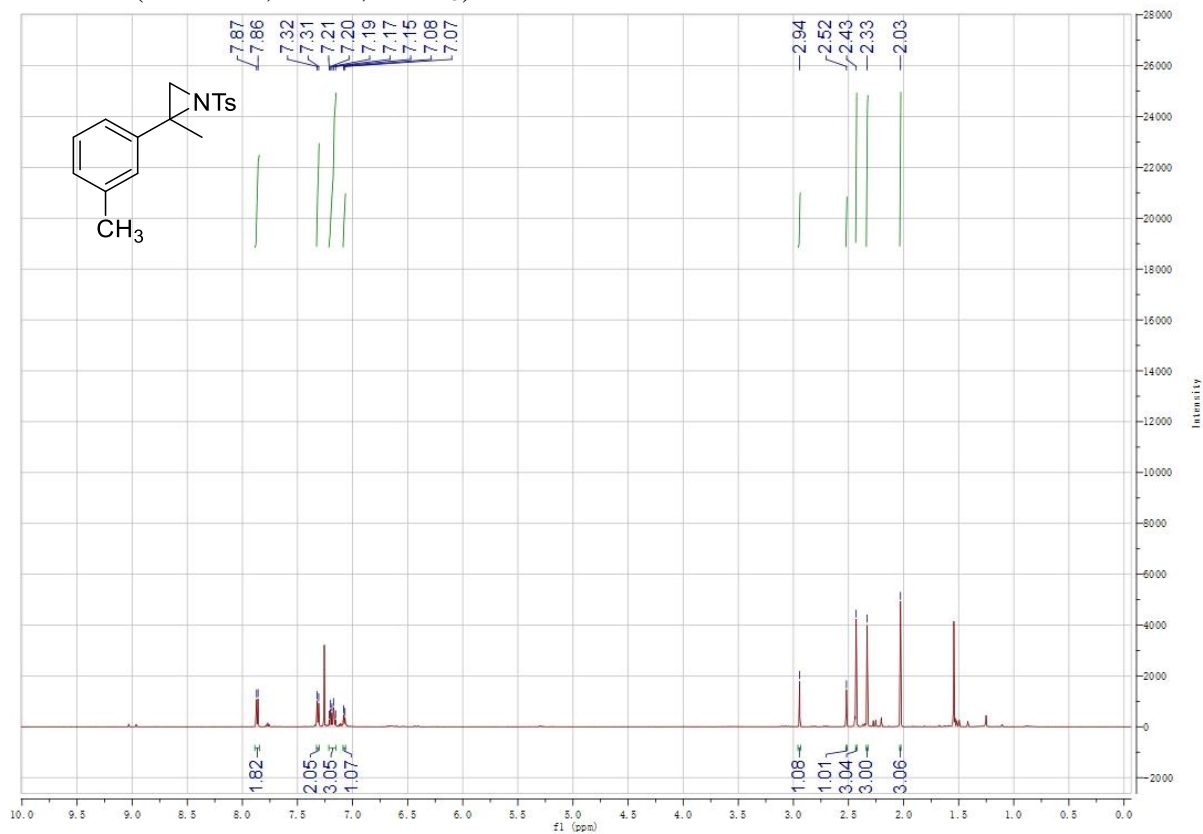

$^{13}\text{C}$  NMR (101 MHz, 293 K,  $\text{CDCl}_3$ )

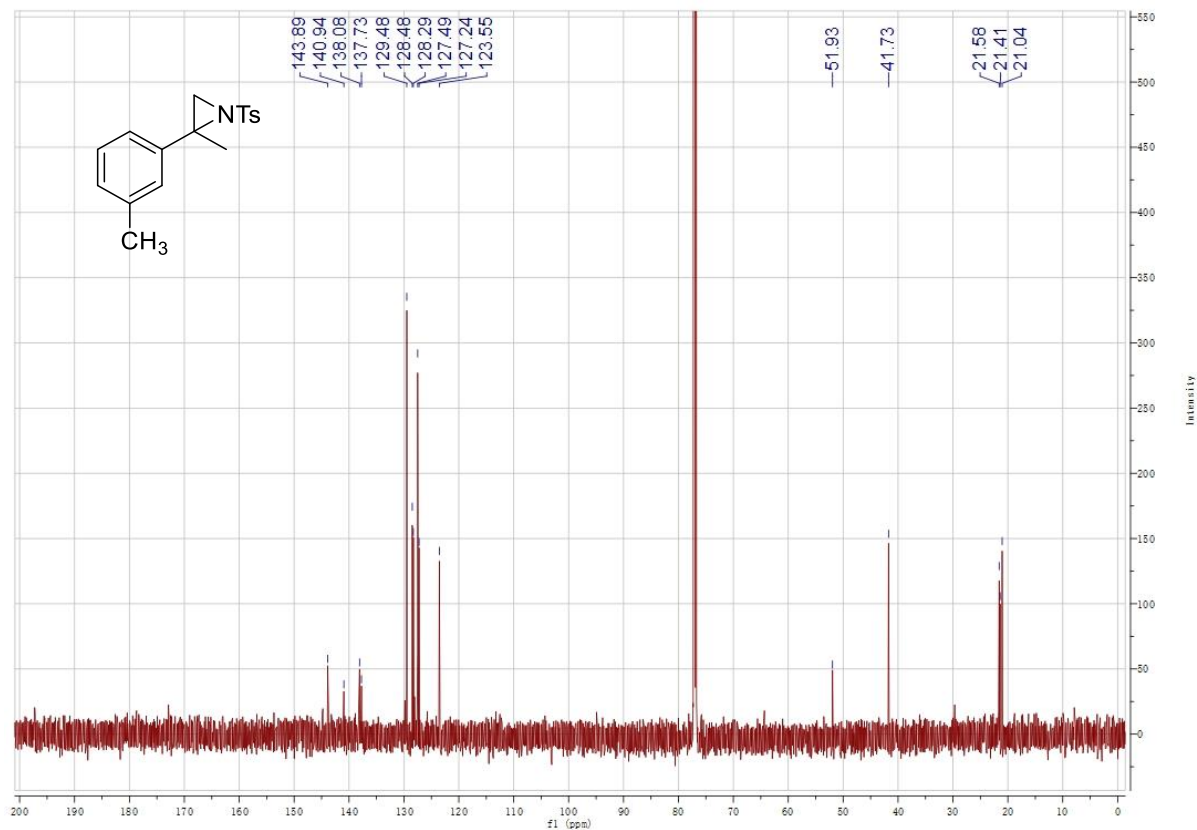

**Supplementary Figure 45. 2-(3-Methoxyphenyl)-2-methyl-1-tosylaziridine (11g)**

$^1\text{H}$  NMR (400 MHz, 293 K,  $\text{CDCl}_3$ )

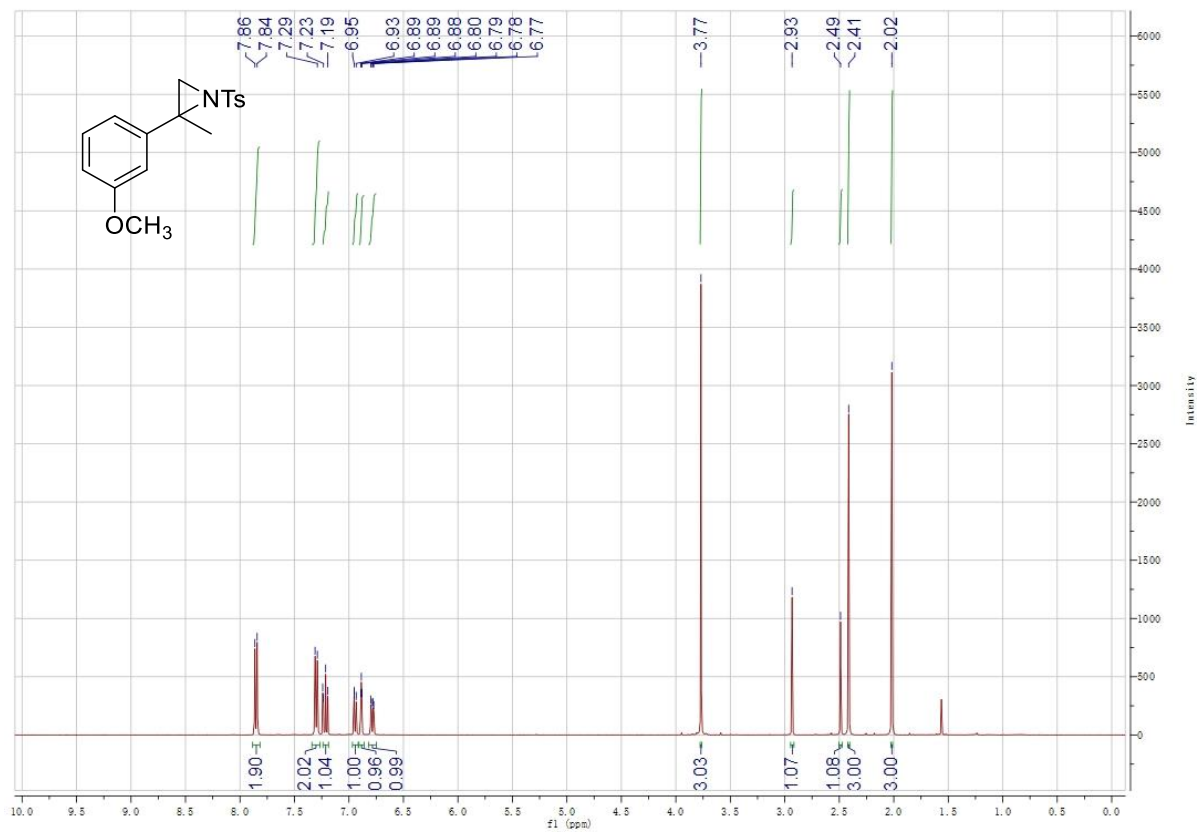

$^{13}\text{C}$  NMR (101 MHz, 293 K,  $\text{CDCl}_3$ )

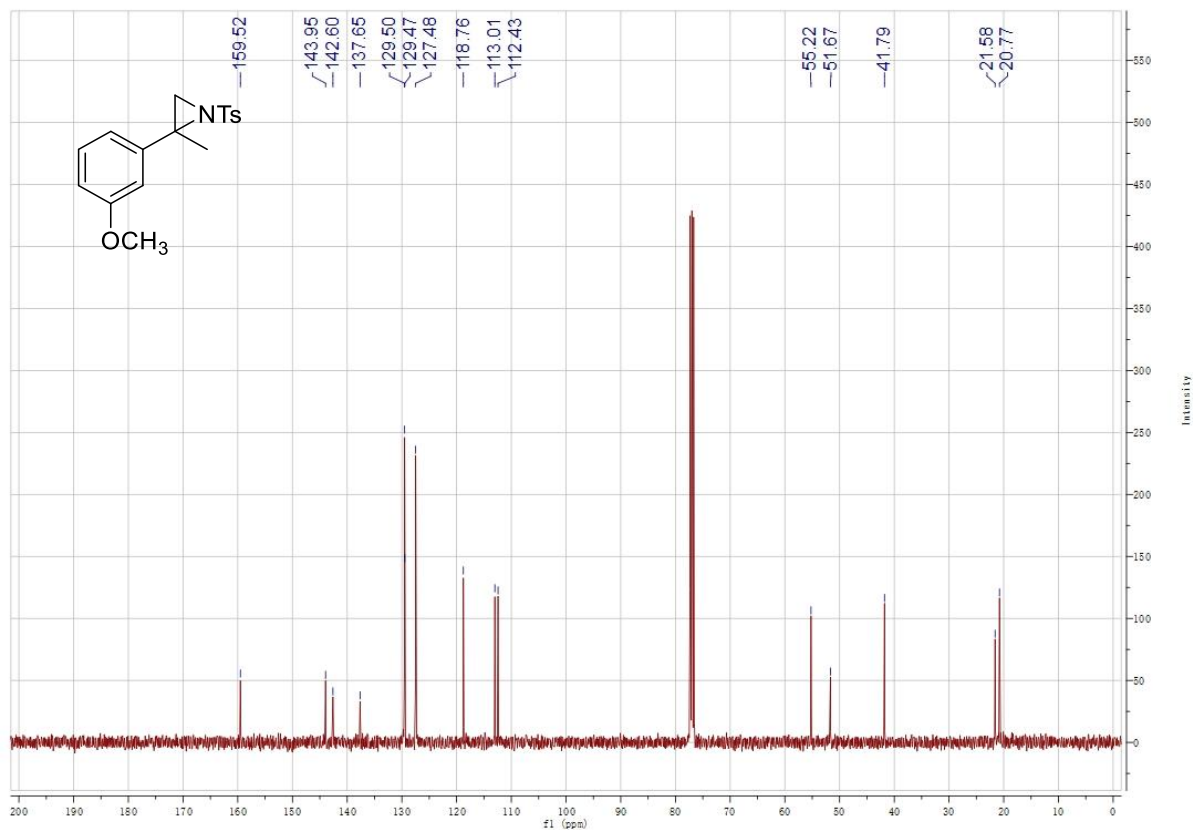

**Supplementary Figure 46.** 2-Methyl-1-tosyl-2-(3-(trifluoromethyl)phenyl)aziridine (**11h**)  
 $^1\text{H}$  NMR (400 MHz, 293 K,  $\text{CDCl}_3$ )

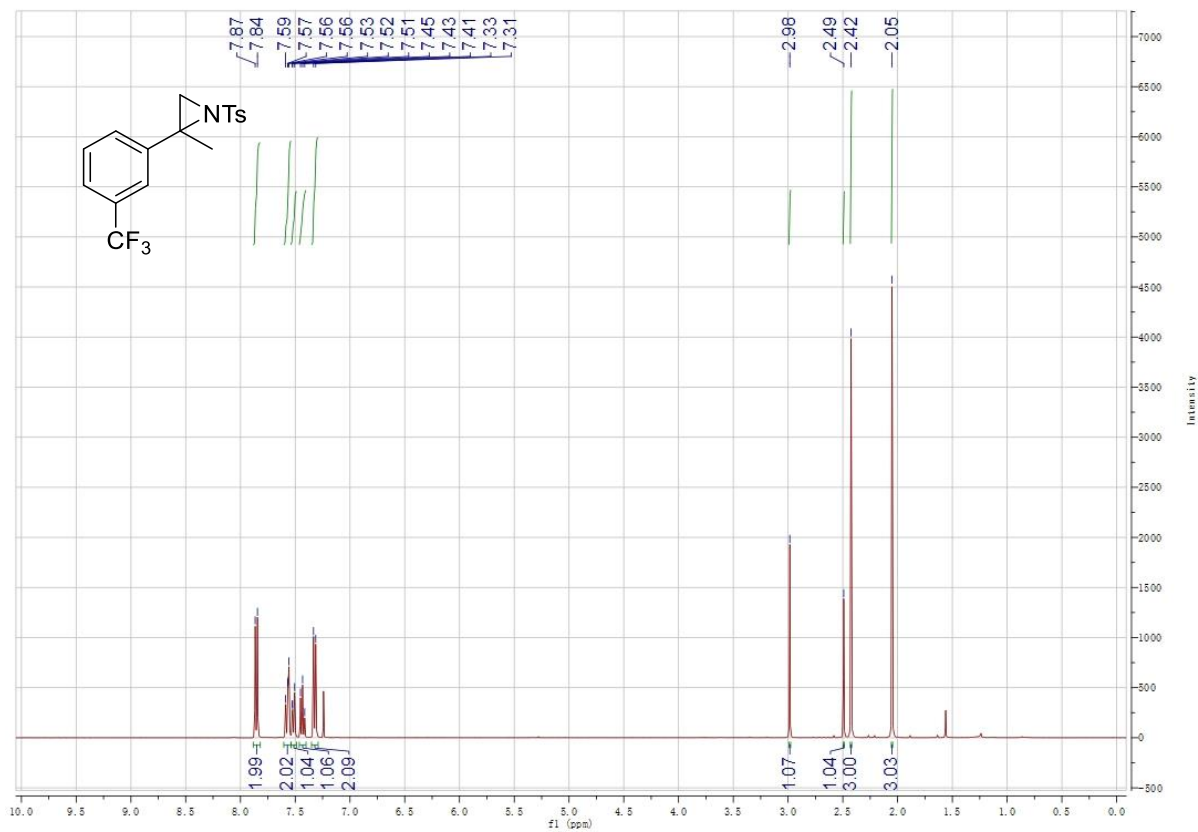



$^{13}\text{C}$  NMR (101 MHz, 293 K,  $\text{CDCl}_3$ )

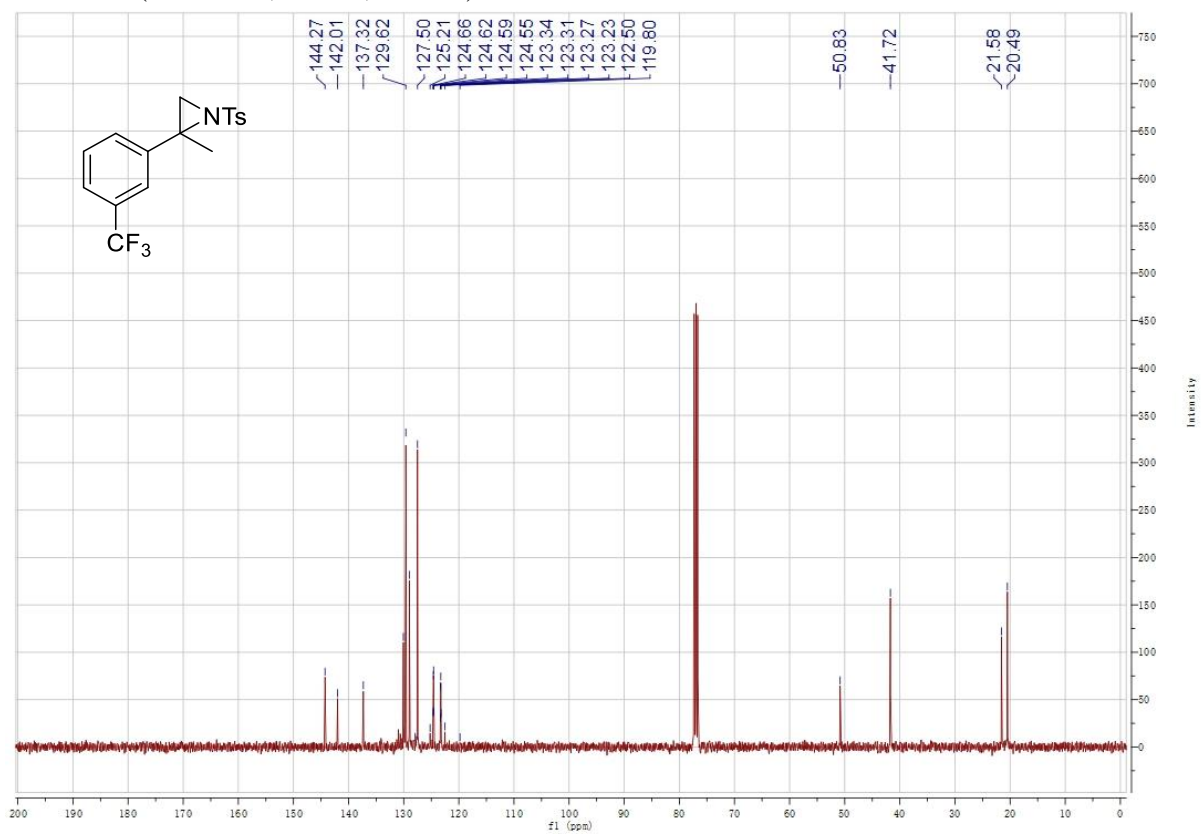

$^{19}\text{F}$  NMR (376 MHz, 293 K,  $\text{CDCl}_3$ )

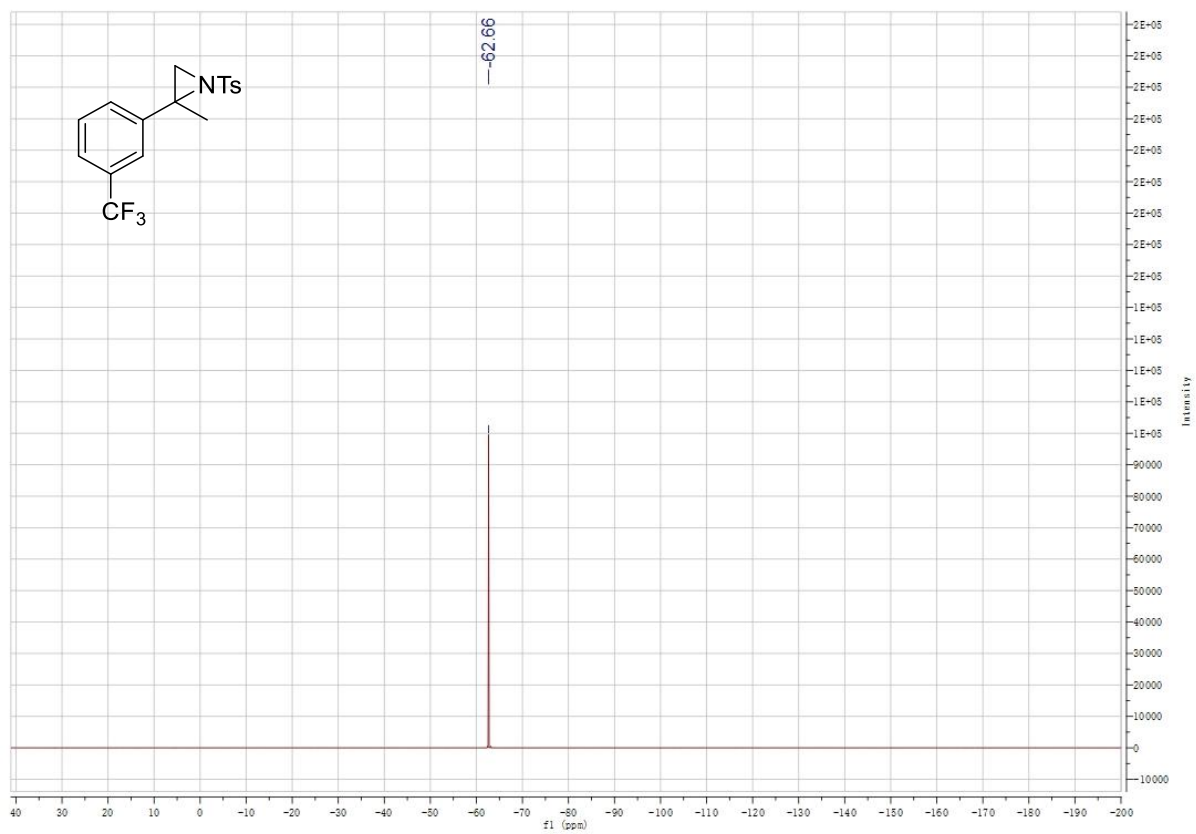

**Supplementary Figure 47. 2-(2-Bromophenyl)-2-methyl-1-tosylaziridine (**11i**)**

<sup>1</sup>H NMR (400 MHz, 293 K, CDCl<sub>3</sub>)

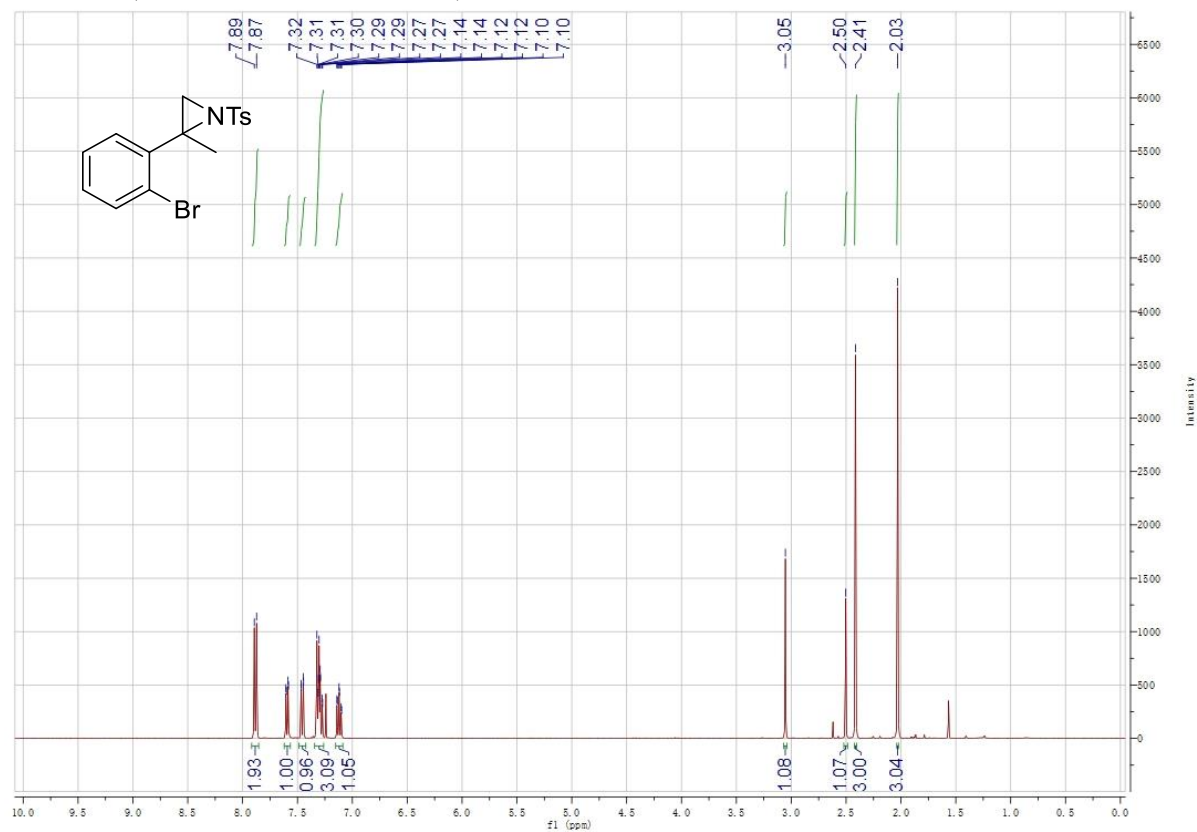

<sup>13</sup>C NMR (101 MHz, 293 K, CDCl<sub>3</sub>)

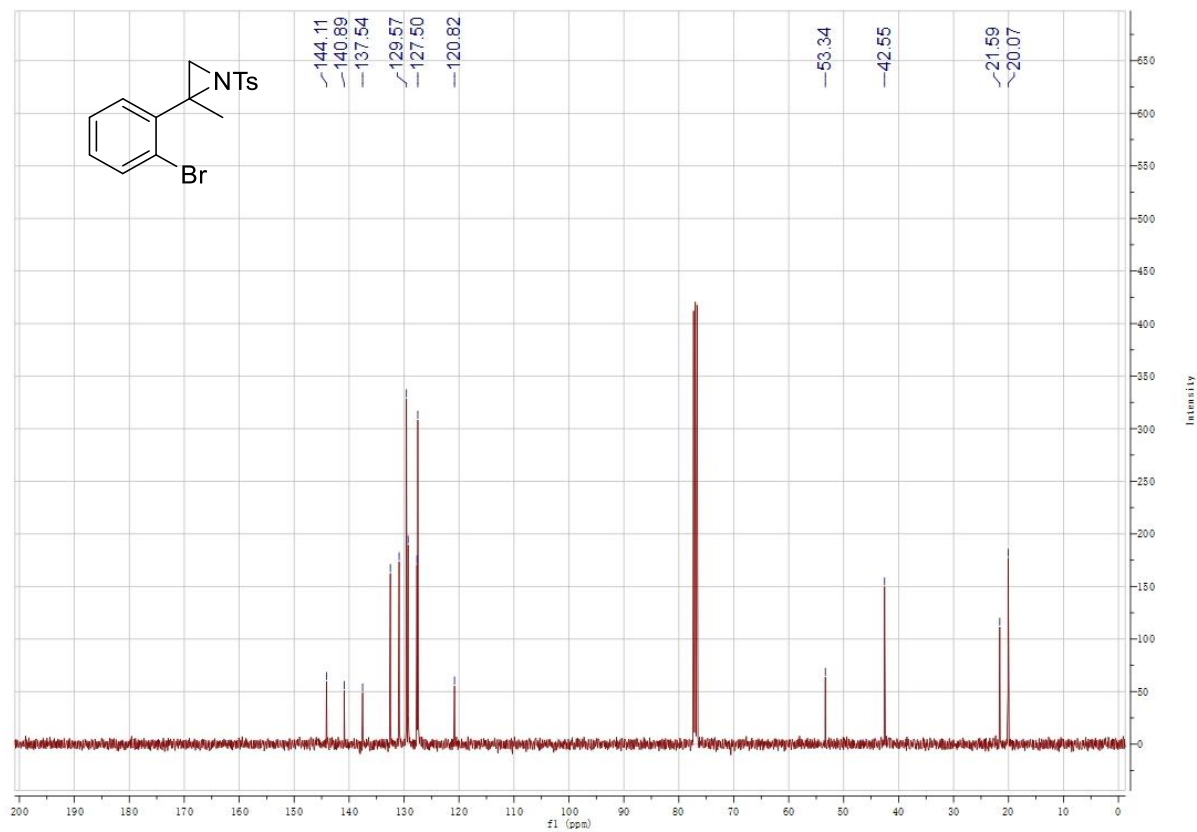

**Supplementary Figure 48. 2-Methyl-2-(*o*-tolyl)-1-tosylaziridine (**11j**)**

<sup>1</sup>H NMR (400 MHz, 293 K, CDCl<sub>3</sub>)

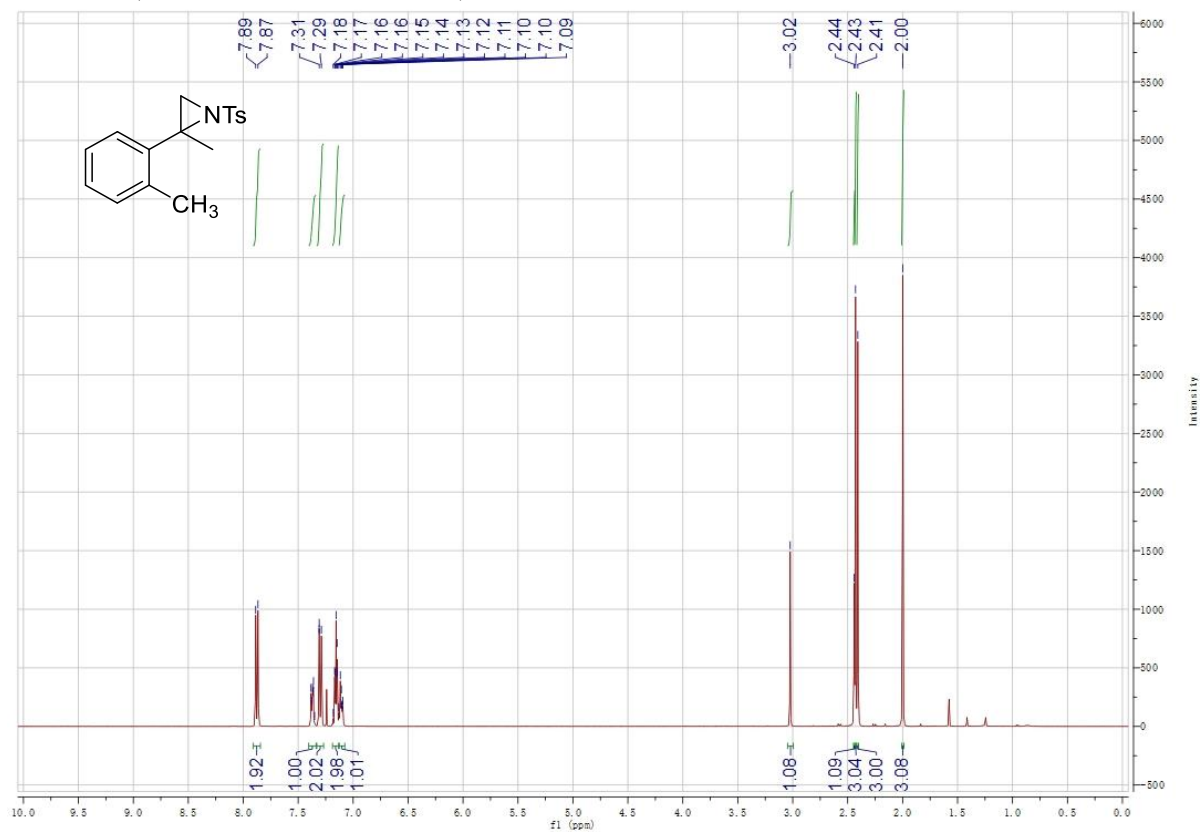

<sup>13</sup>C NMR (101 MHz, 293 K, CDCl<sub>3</sub>)

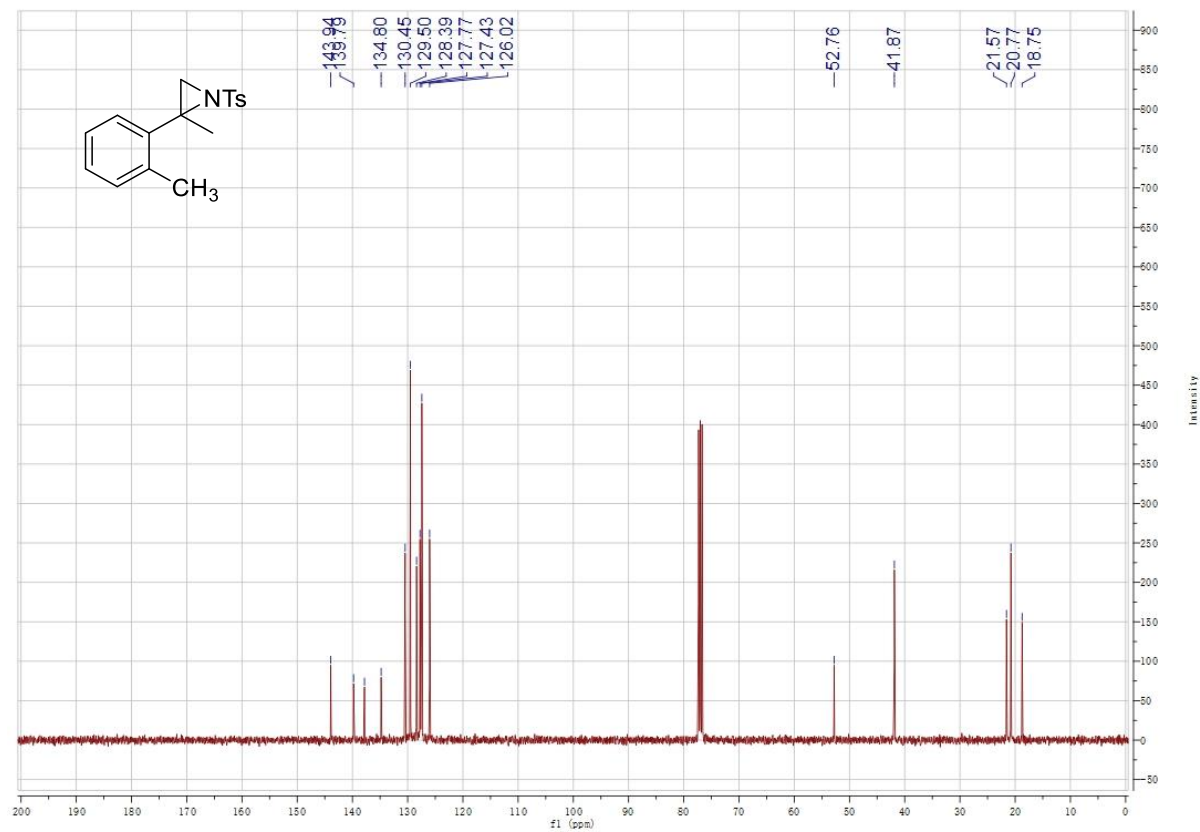

**Supplementary Figure 49.** 2-(2,4-Dimethylphenyl)-2-methyl-1-tosylaziridine (**11k**)  
<sup>1</sup>H NMR (400 MHz, 293 K, CDCl<sub>3</sub>)

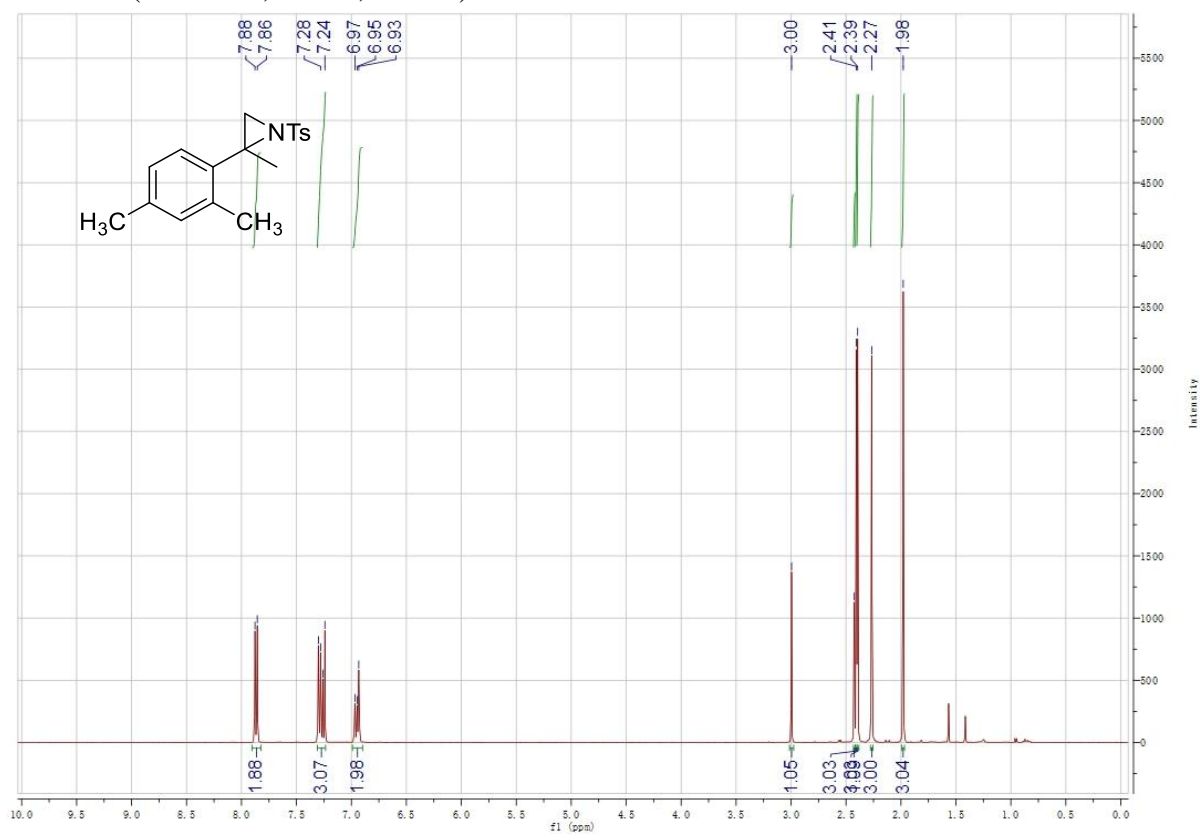

<sup>13</sup>C NMR (101 MHz, 293 K, CDCl<sub>3</sub>)

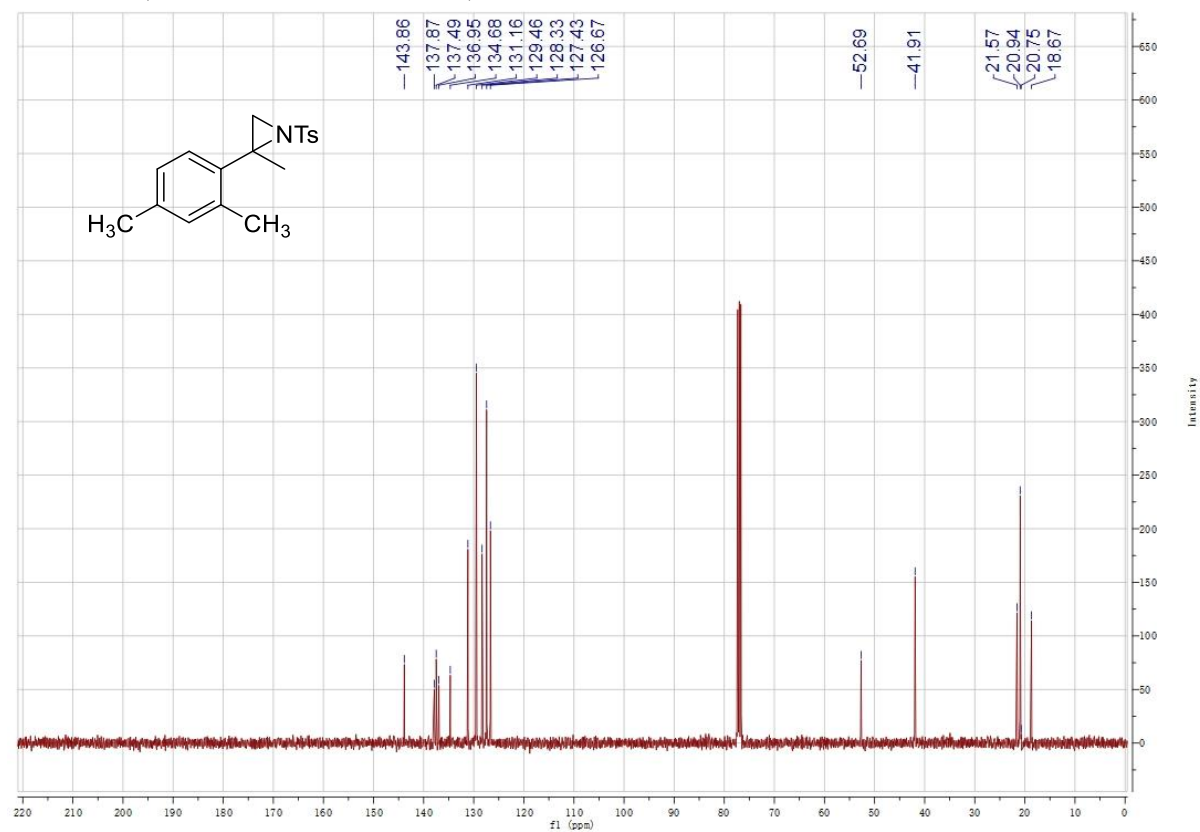

**Supplementary Figure 50. 2-Methyl-2-phenyl-1-(phenylsulfonyl)aziridine (**111**)**

$^1\text{H}$  NMR (400 MHz, 293 K,  $\text{CDCl}_3$ )

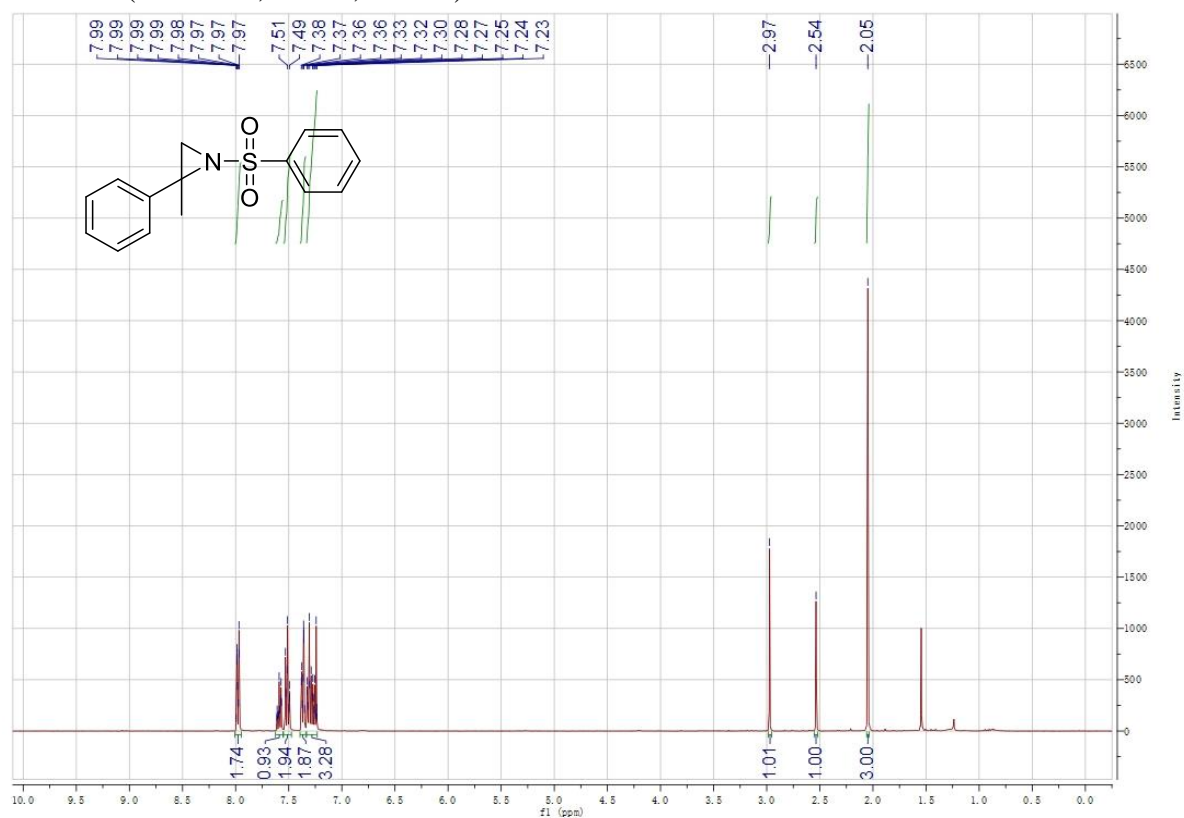

$^{13}\text{C}$  NMR (101 MHz, 293 K,  $\text{CDCl}_3$ )

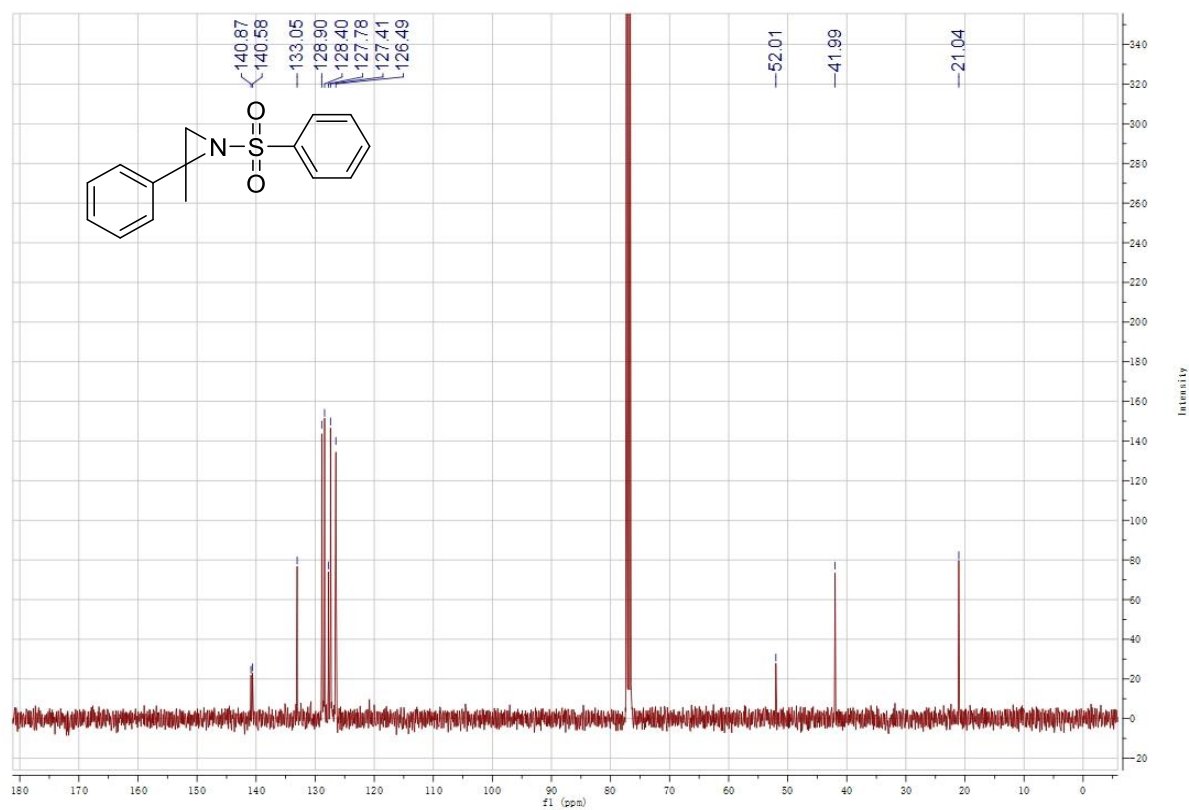

**Supplementary Figure 51.** 1-((4-Chlorophenyl)sulfonyl)-2-methyl-2-phenylaziridine (**11m**)  
<sup>1</sup>H NMR (400 MHz, 293 K, CDCl<sub>3</sub>)

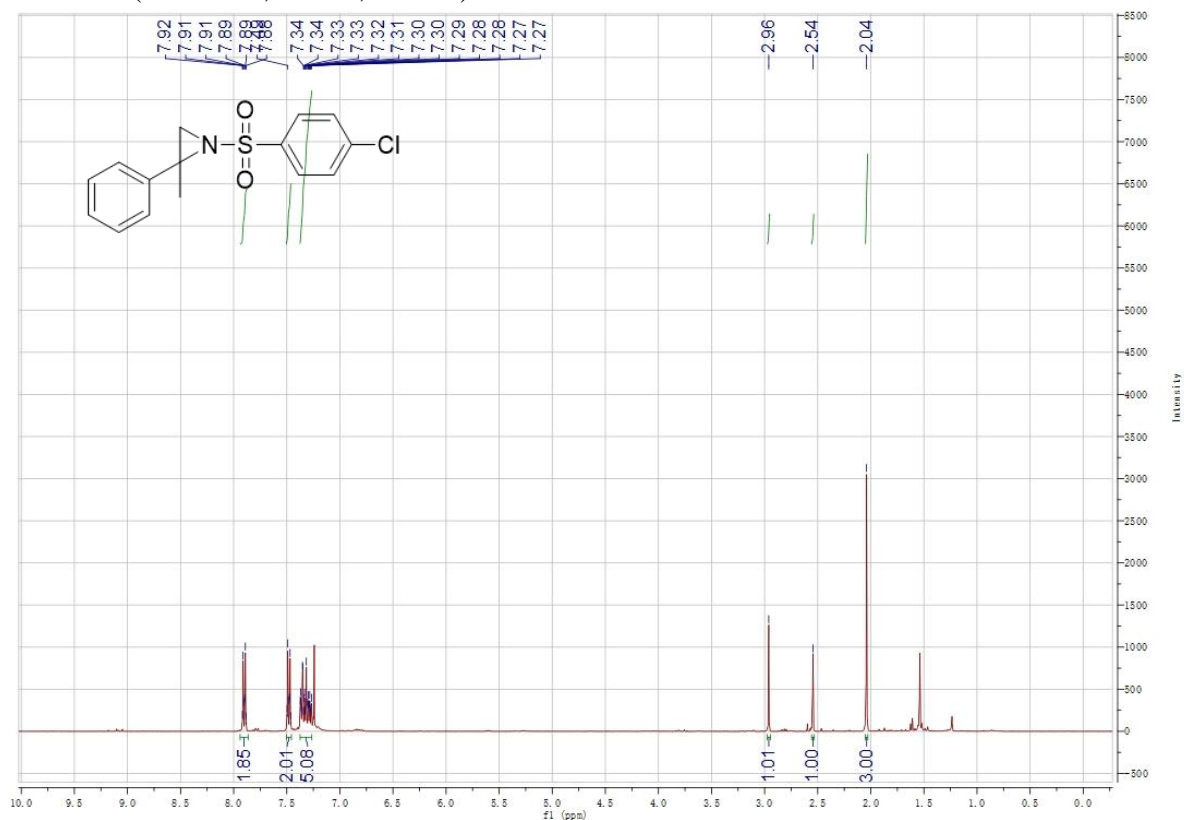

<sup>13</sup>C NMR (101 MHz, 293 K, CDCl<sub>3</sub>)

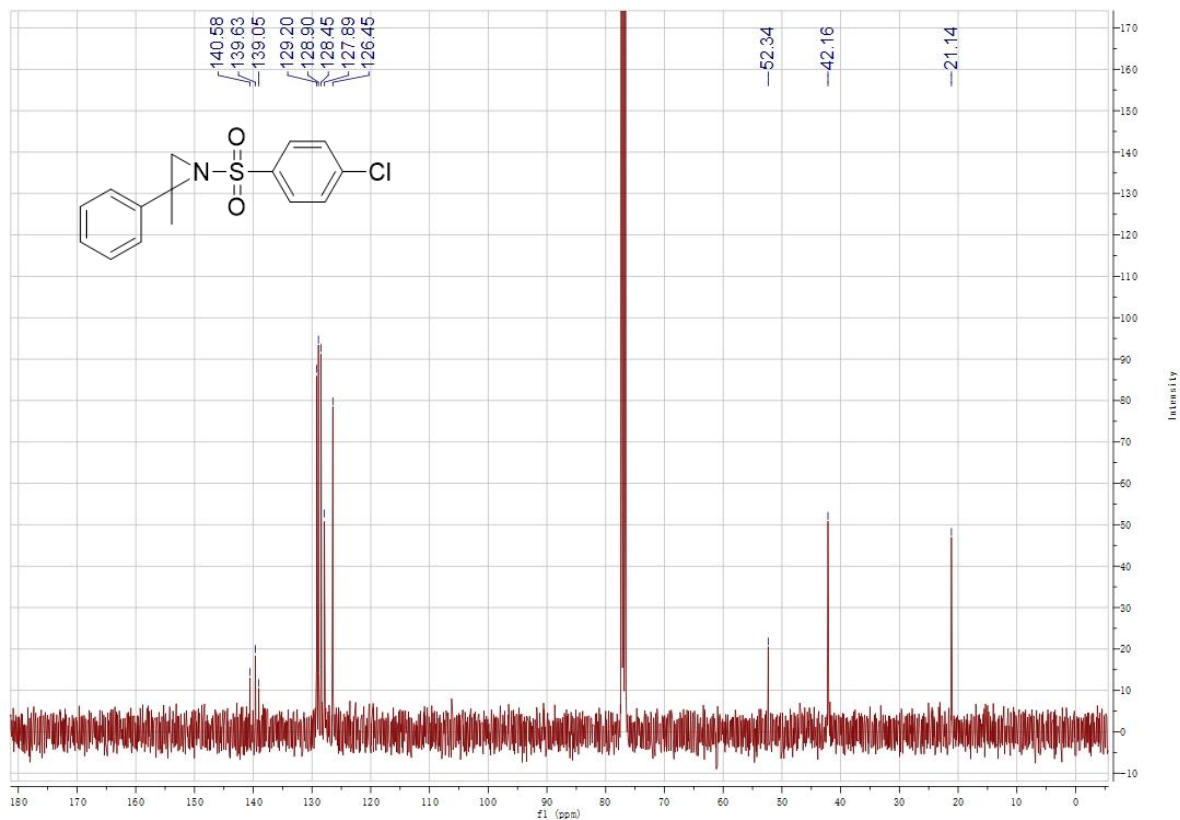

**Supplementary Figure 52. 2-Methyl-1-(naphthalen-2-ylsulfonyl)-2-phenylaziridine (**11n**)**  
<sup>1</sup>H NMR (600 MHz, 293 K, CDCl<sub>3</sub>)

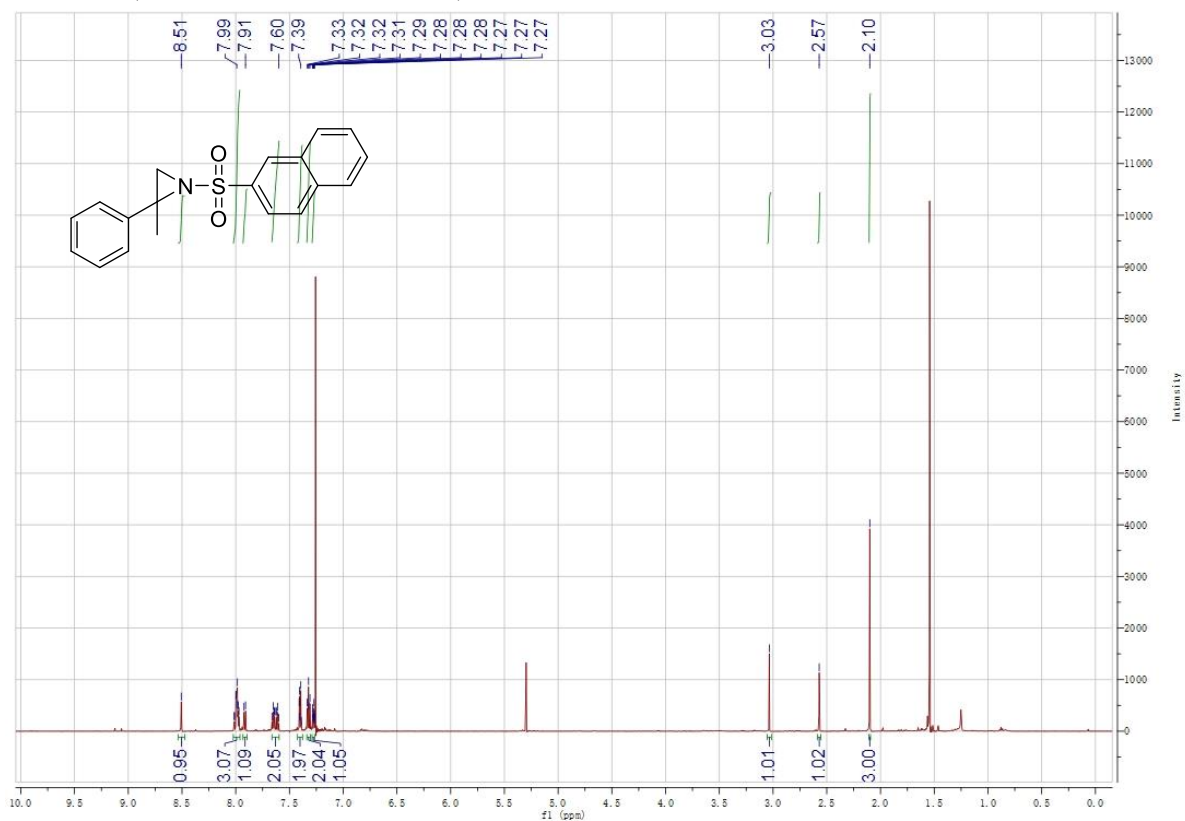

<sup>13</sup>C NMR (151 MHz, 293 K, CDCl<sub>3</sub>)

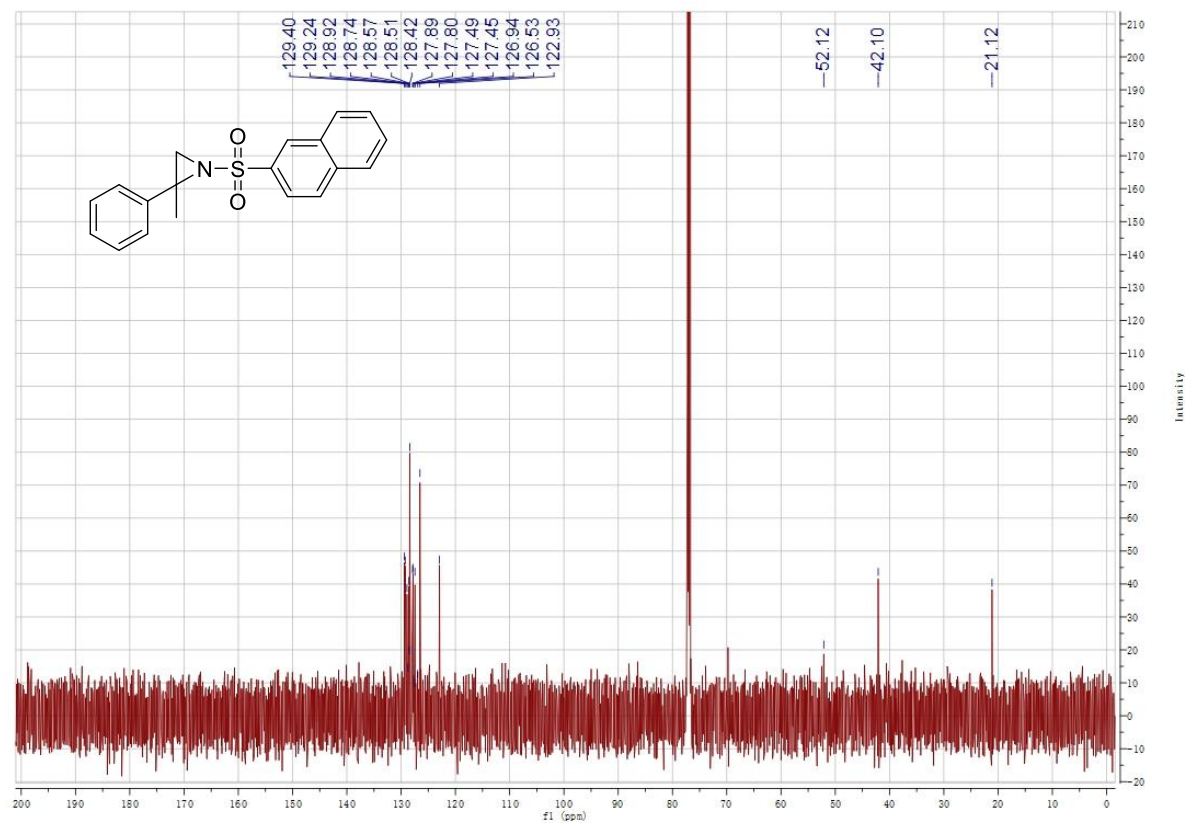

**Supplementary Figure 53. 2-Methyl-1-(methylsulfonyl)-2-phenylaziridine (**11o**)**

$^1\text{H}$  NMR (400 MHz, 293 K,  $\text{CDCl}_3$ )

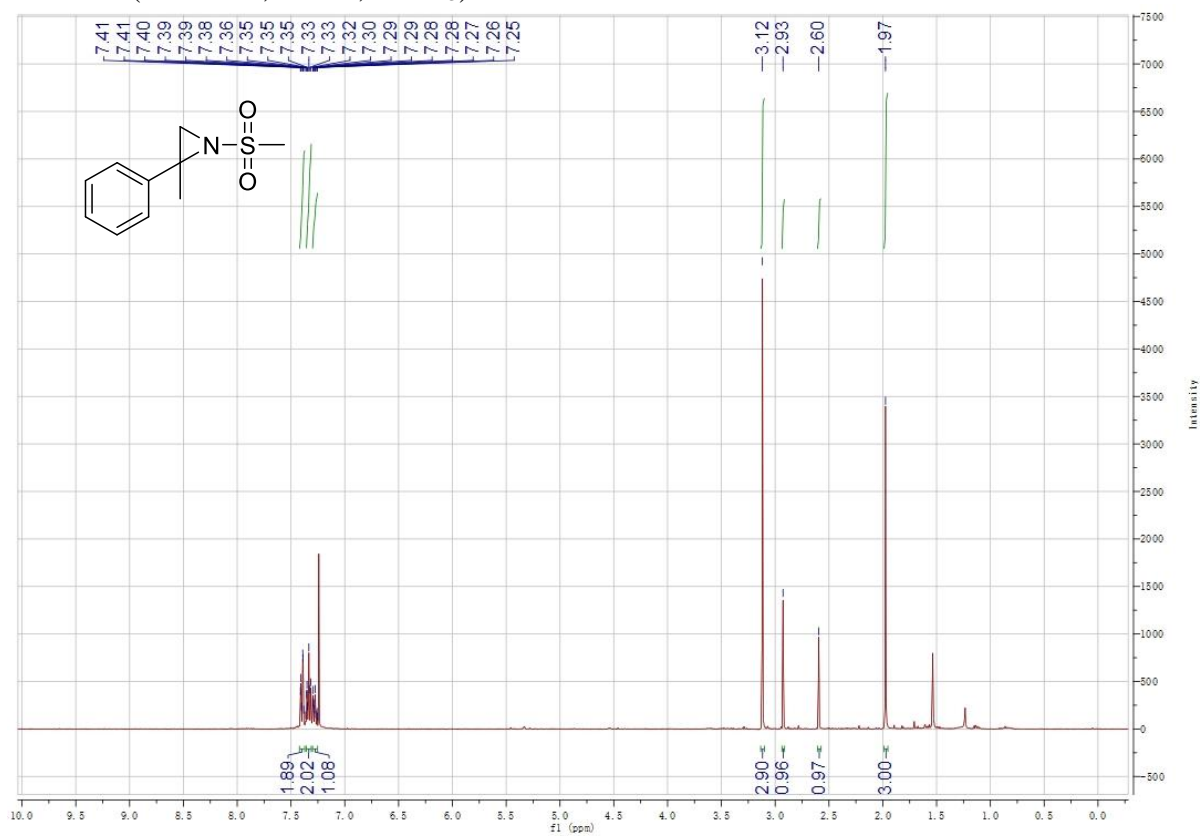

$^{13}\text{C}$  NMR (101 MHz, 293 K,  $\text{CDCl}_3$ )

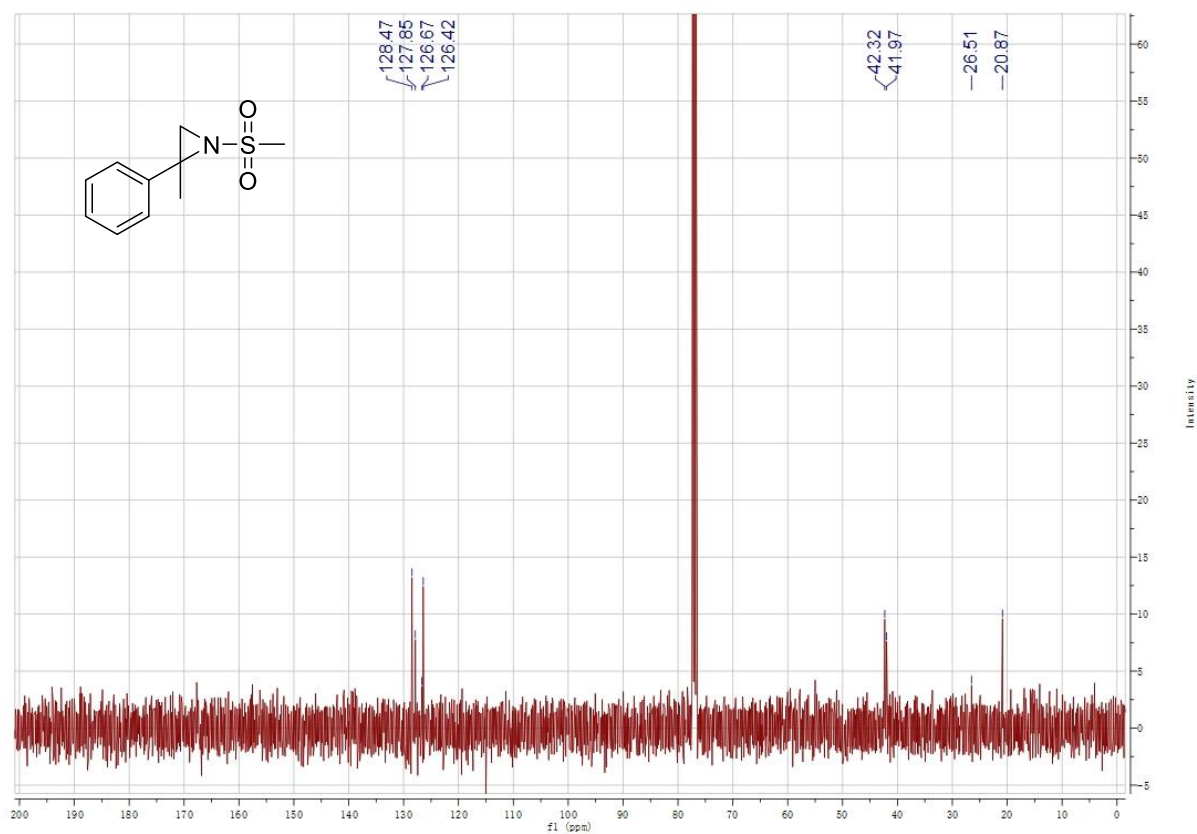



**Supplementary Figure 54. 4-(2-Methyl-1-tosylaziridin-2-yl)pyridine (11p)**

<sup>1</sup>H NMR (400 MHz, 293 K, CDCl<sub>3</sub>)

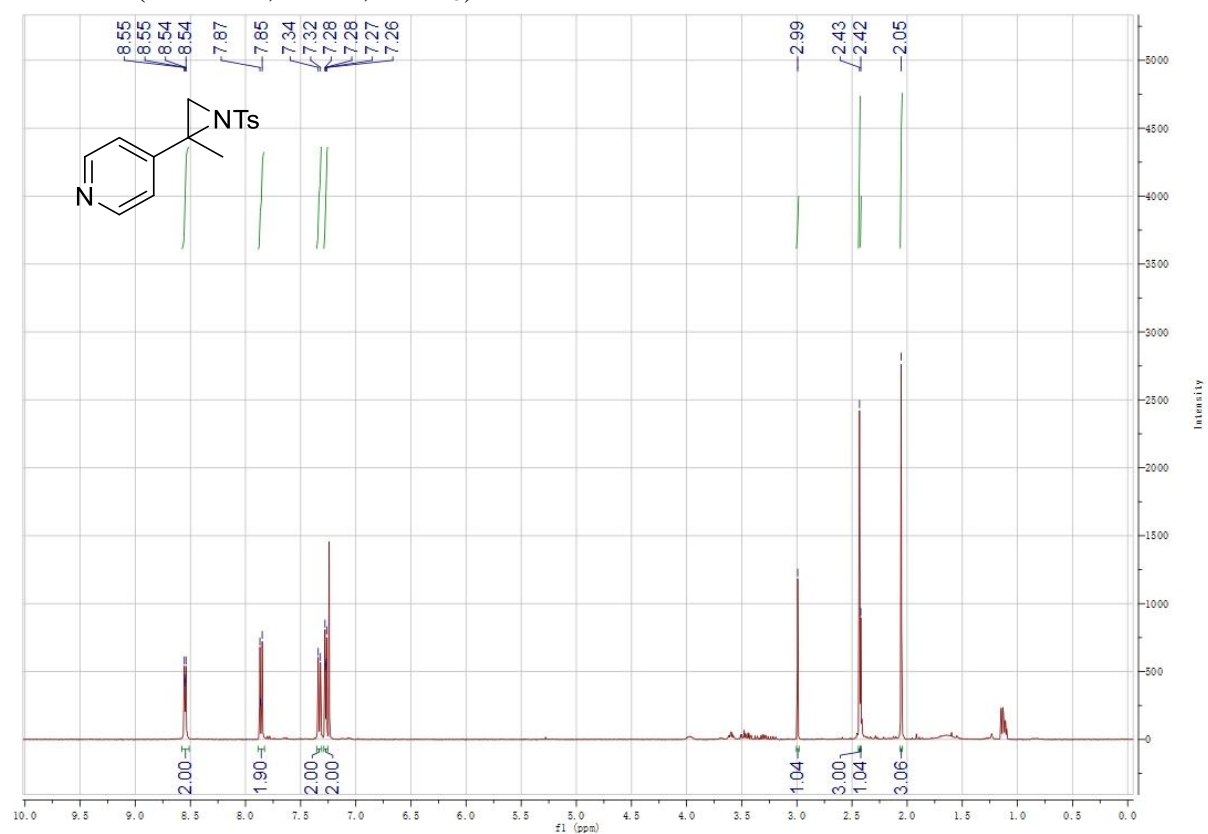

<sup>13</sup>C NMR (101 MHz, 293 K, CDCl<sub>3</sub>)

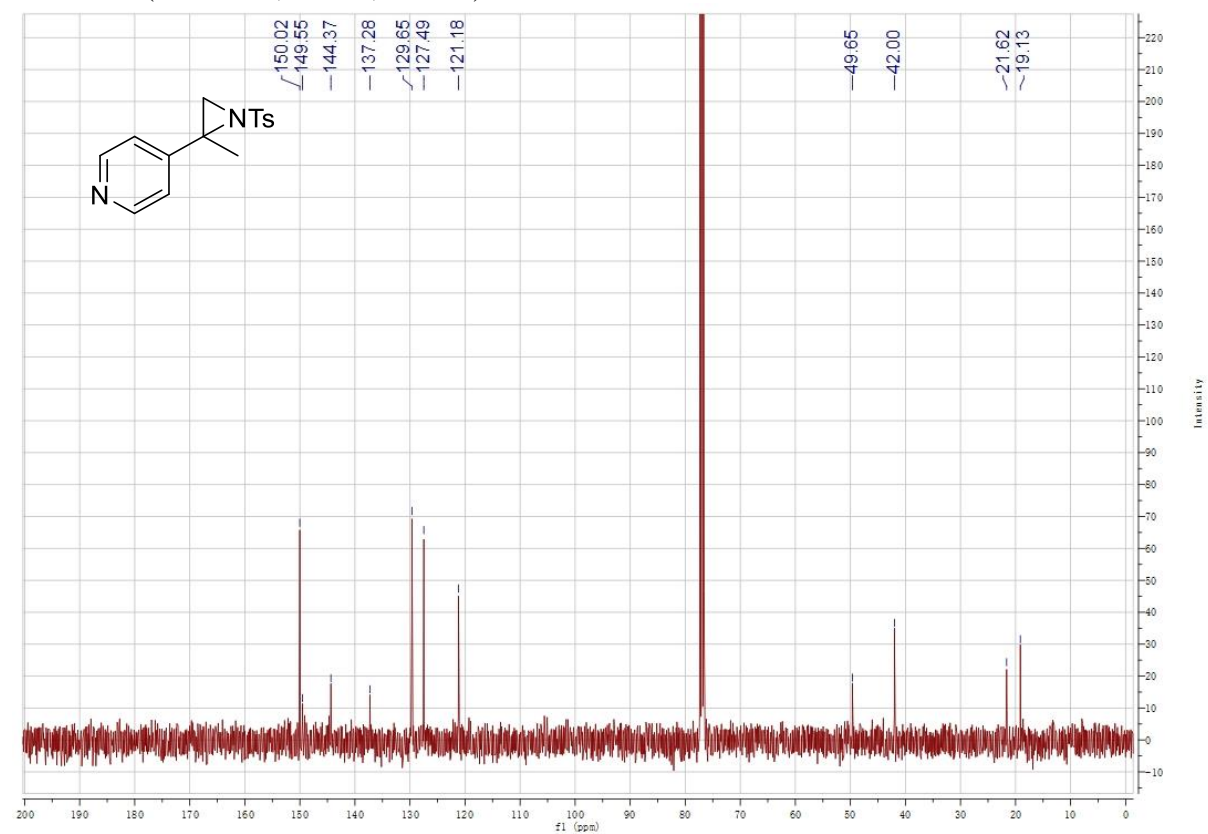

**Supplementary Figure 55. 2-(2-Methyl-1-tosylaziridin-2-yl)pyridine (**11q**)**

$^1\text{H}$  NMR (600 MHz, 293 K,  $\text{CDCl}_3$ )

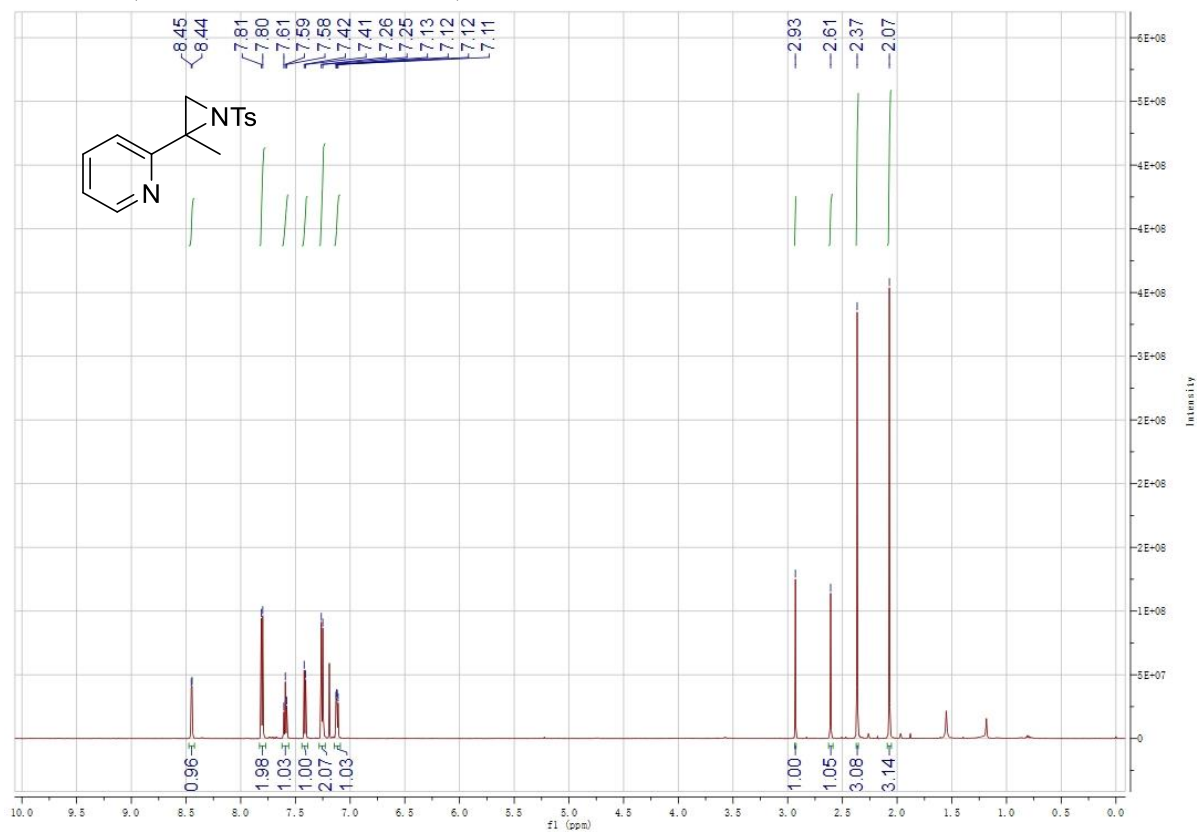

$^{13}\text{C}$  NMR (151 MHz, 293 K,  $\text{CDCl}_3$ )

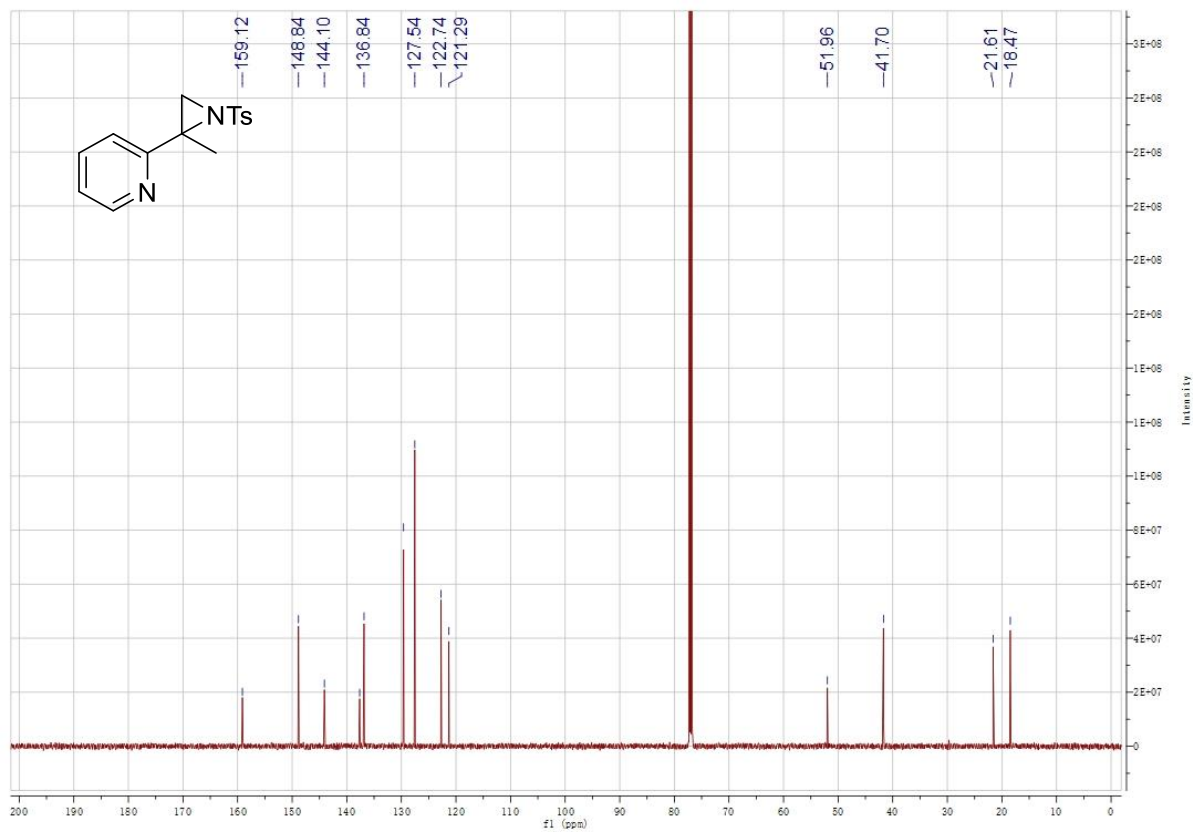

**Supplementary Figure 56. 2-(4-Chlorophenyl)-2-ethyl-1-tosylaziridine (**11r**)**

<sup>1</sup>H NMR (400 MHz, 293 K, CDCl<sub>3</sub>)

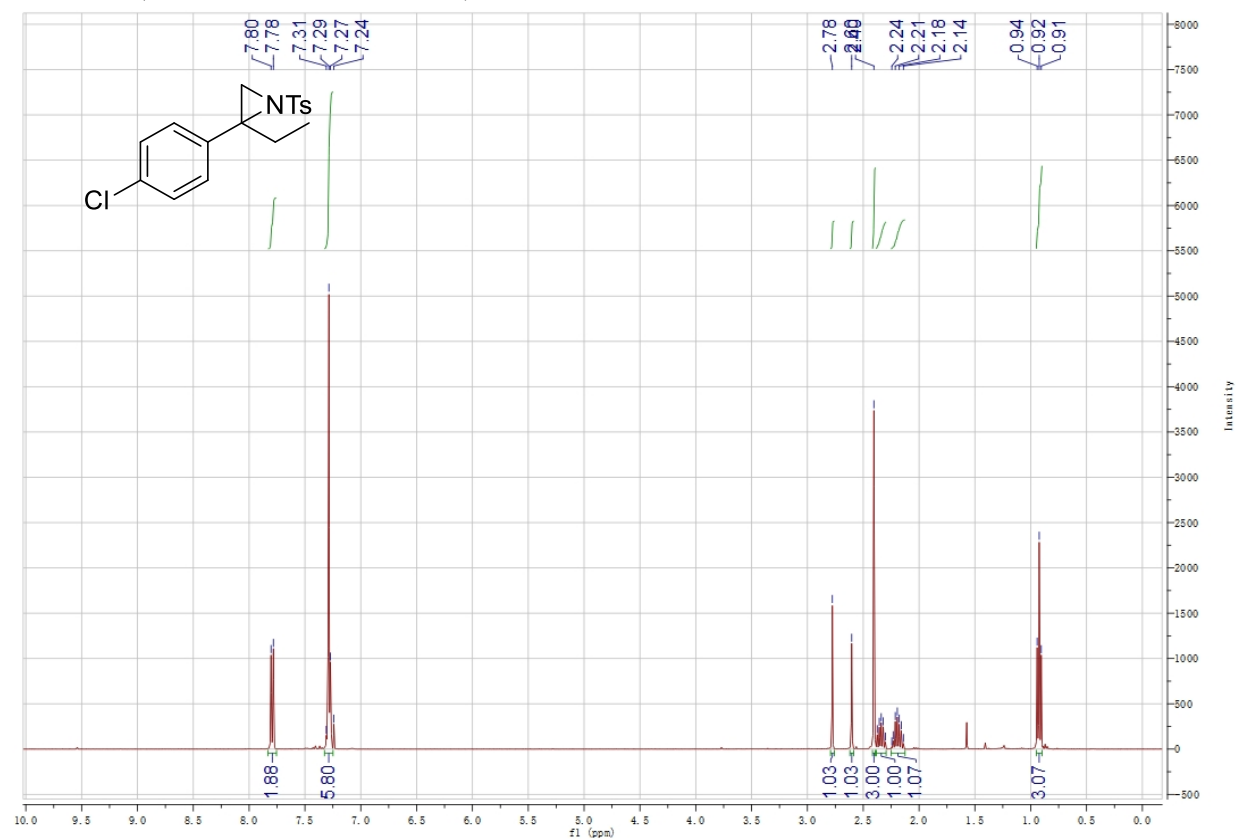

<sup>13</sup>C NMR (101 MHz, 293 K, CDCl<sub>3</sub>)

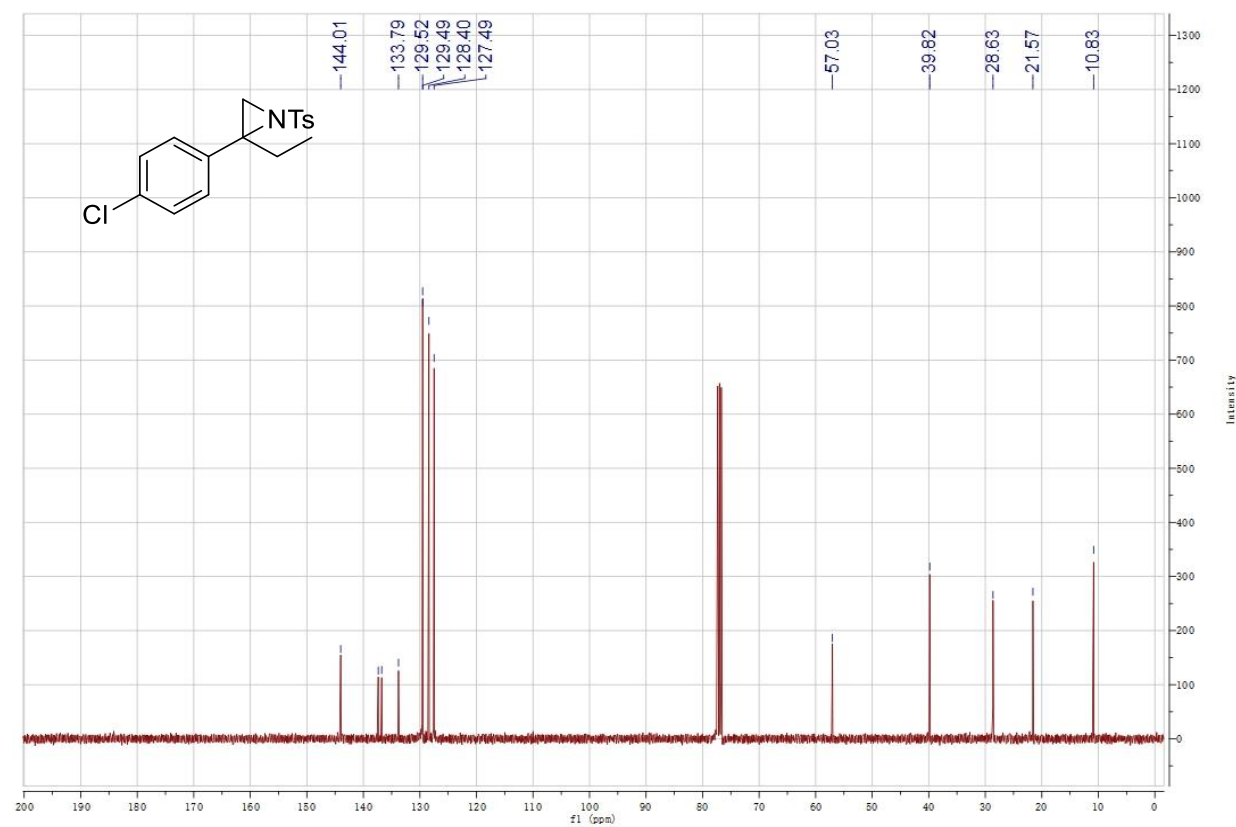

**Supplementary Figure 57. 2-(tert-Butyl)-2-phenyl-1-tosylaziridine (11s)**

<sup>1</sup>H NMR (400 MHz, 293 K, CDCl<sub>3</sub>)

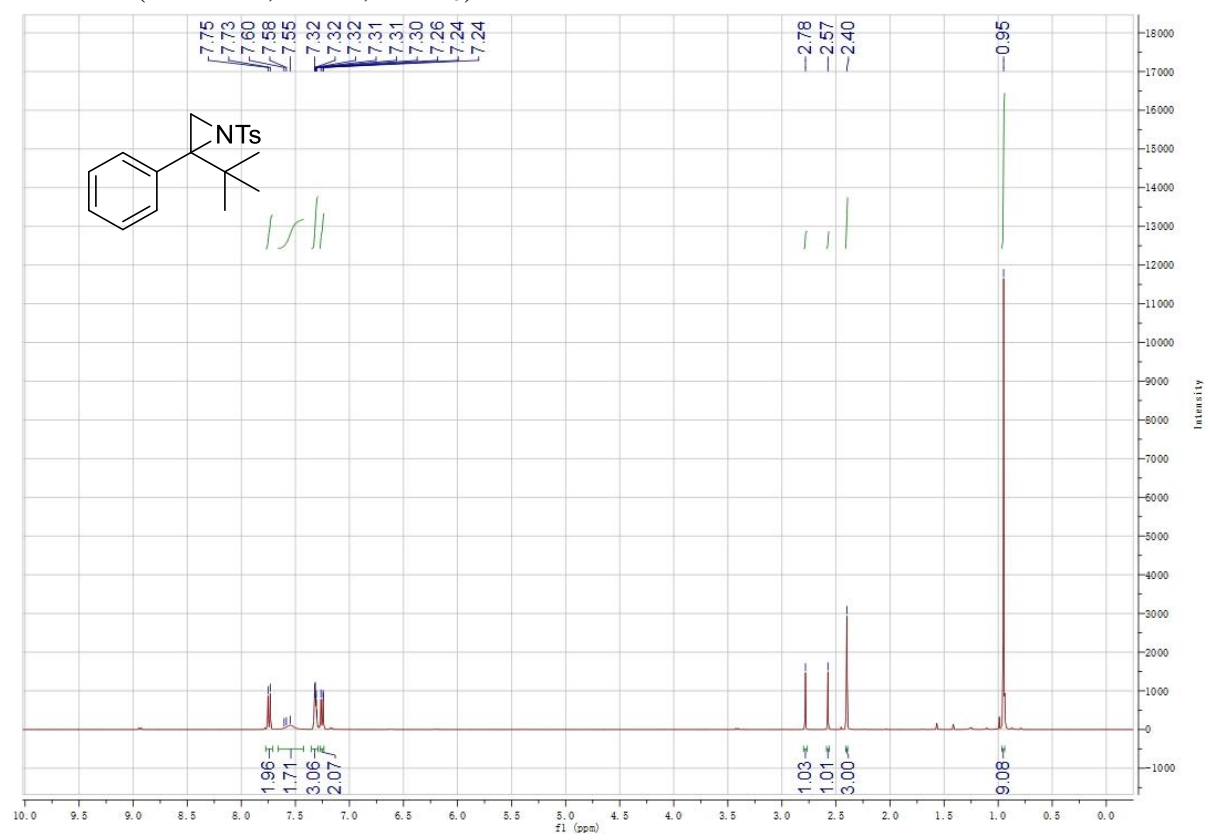

<sup>13</sup>C NMR (101 MHz, 293 K, CDCl<sub>3</sub>)

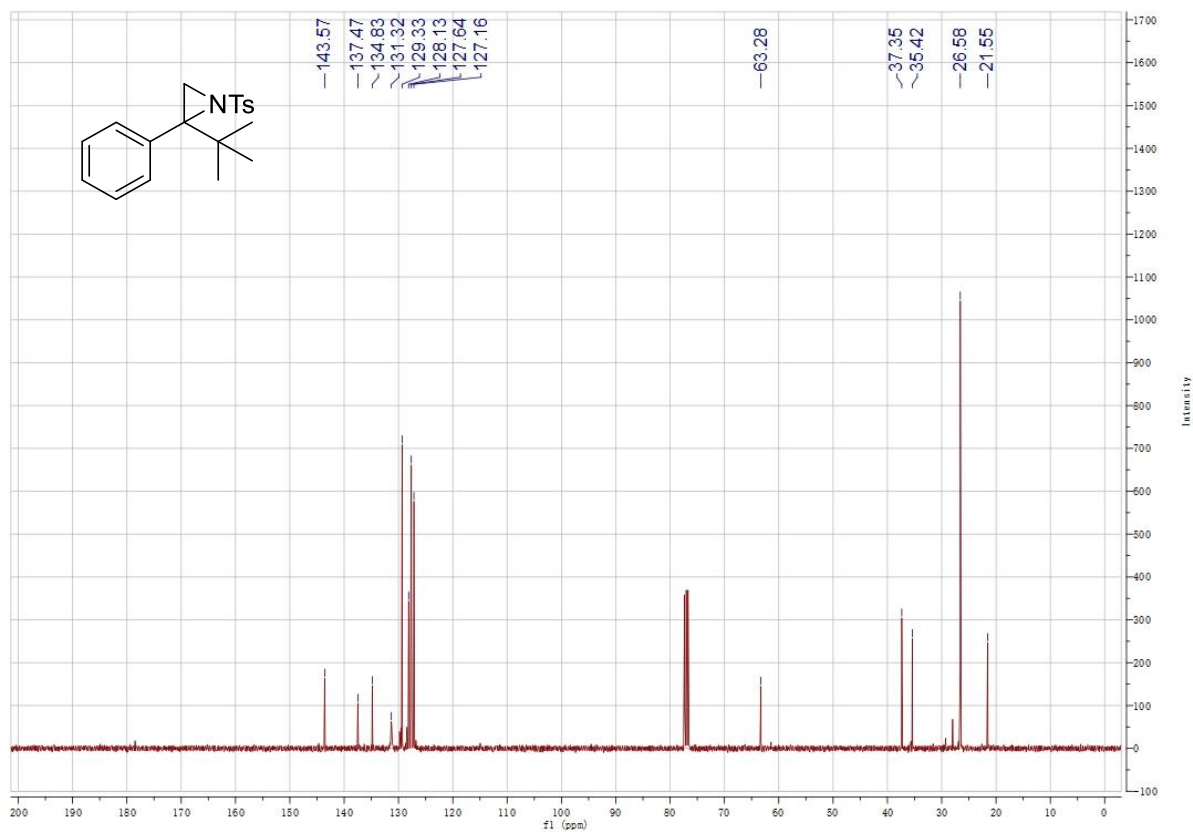

**Supplementary Figure 58.** *1-Phenyl-7-tosyl-7-azabicyclo[4.1.0]heptane (11t)*

$^1\text{H}$  NMR (600 MHz, 293 K,  $\text{CDCl}_3$ )

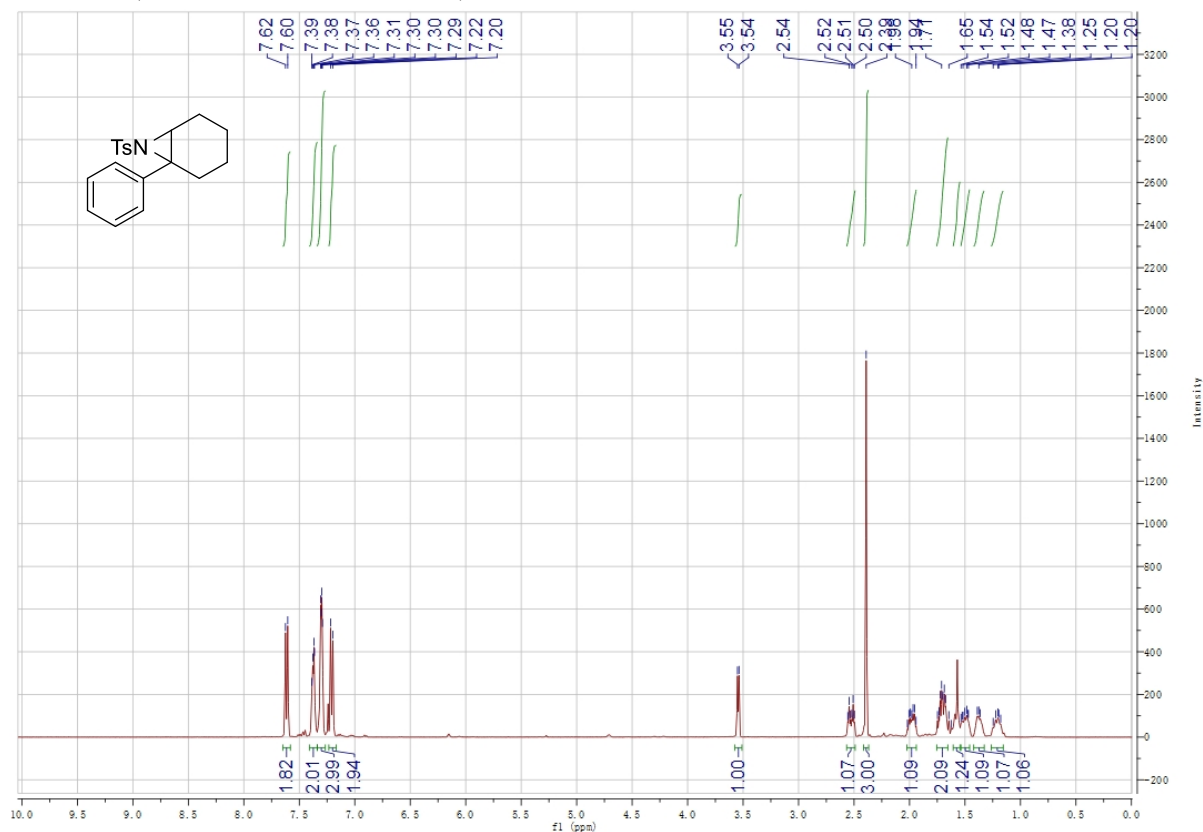

$^{13}\text{C}$  NMR (151 MHz, 293 K,  $\text{CDCl}_3$ )

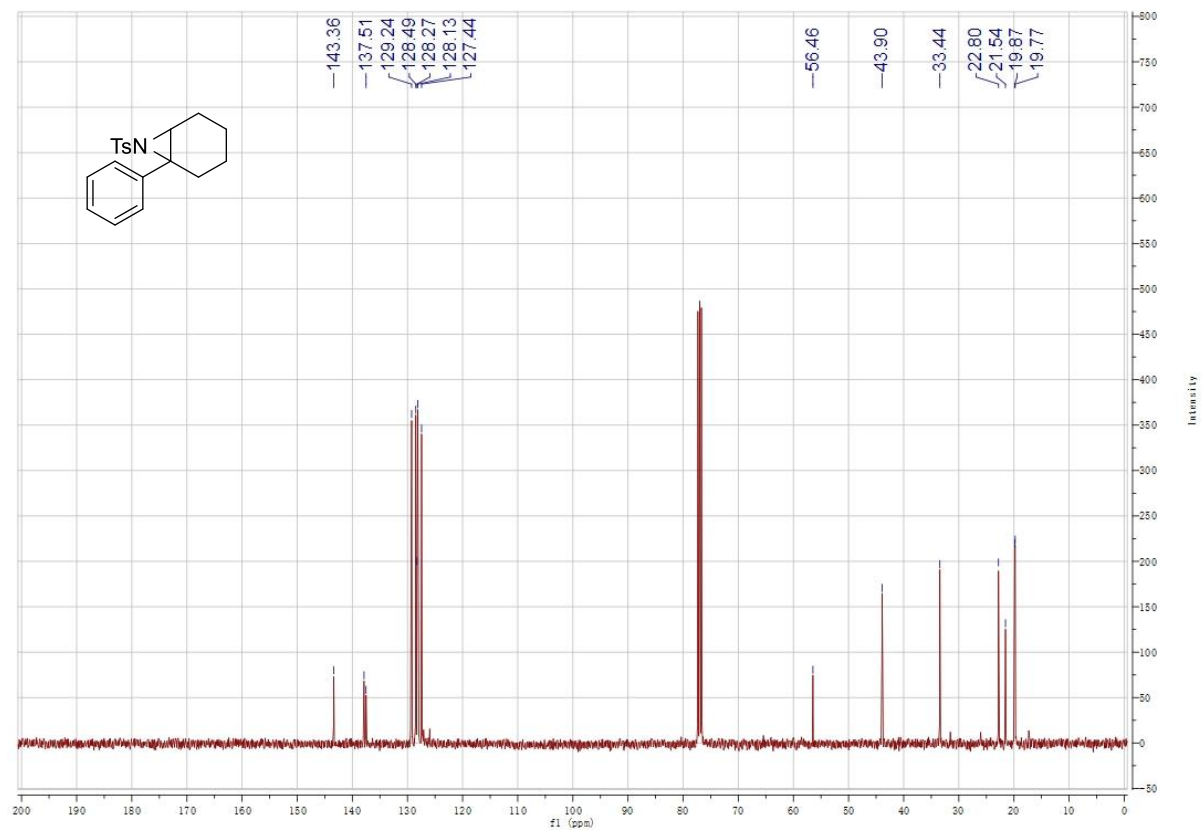

**Supplementary Figure 59.** *1-Methyl-6-tosyl-6-azabicyclo[3.1.0]hexane (11u)*

$^1\text{H}$  NMR (600 MHz, 293 K,  $\text{CDCl}_3$ )

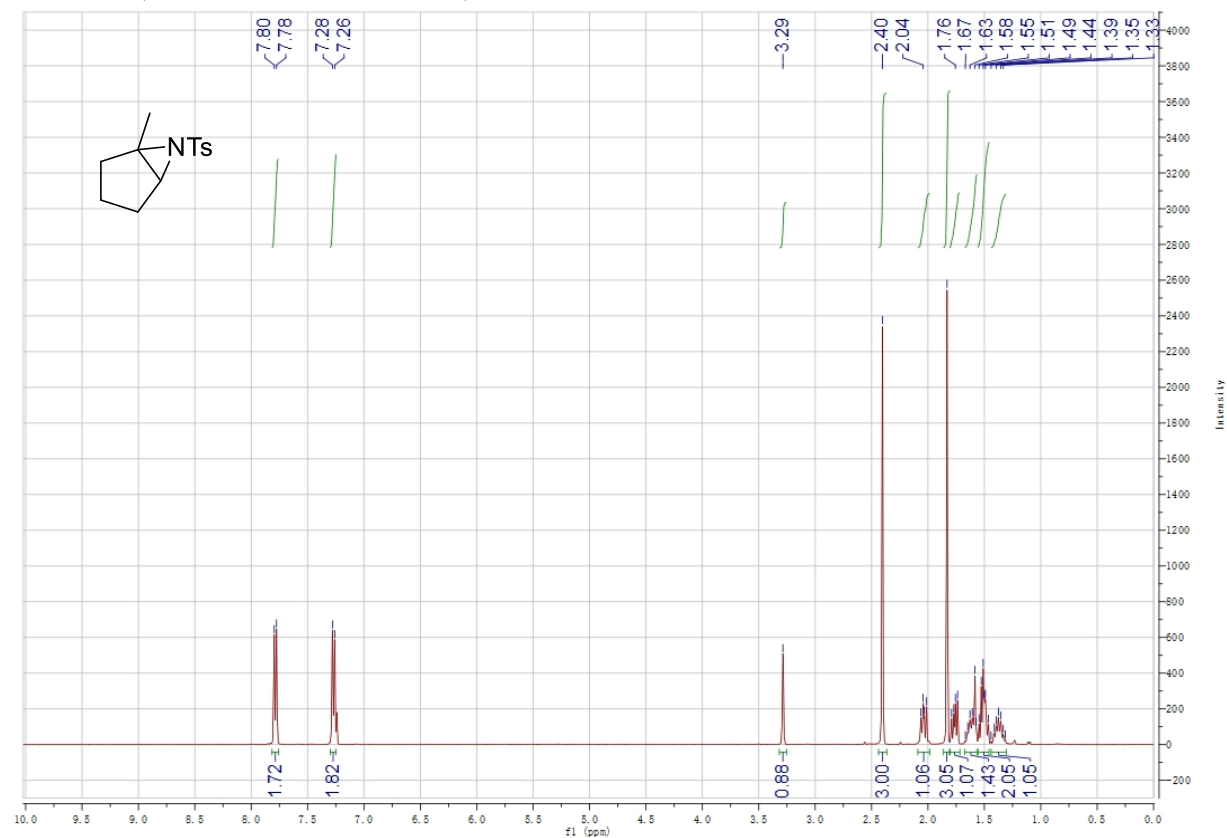

$^{13}\text{C}$  NMR (151 MHz, 293 K,  $\text{CDCl}_3$ )

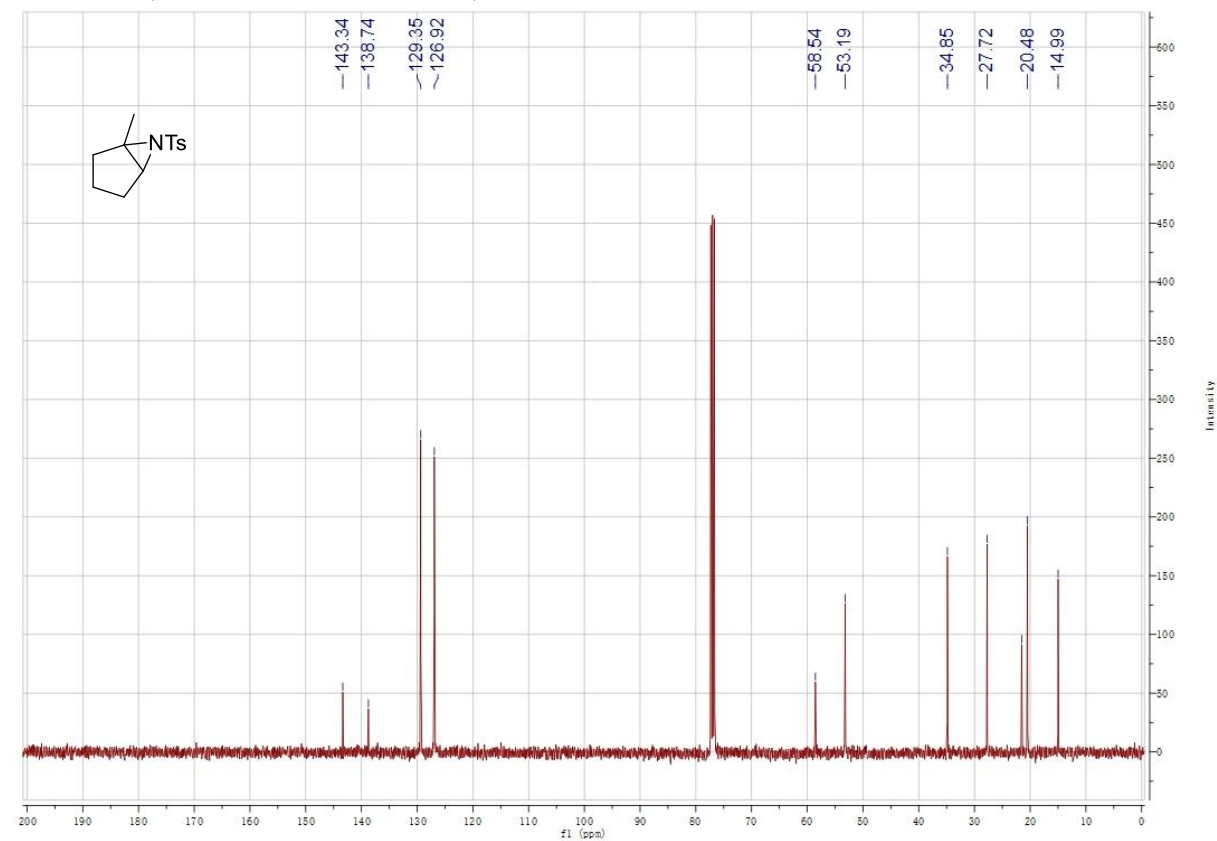

**Supplementary Figure 60. 2-Methyl-2-(phenylethynyl)-1-tosylaziridine (**11v**)**

$^1\text{H}$  NMR (600 MHz, 293 K,  $\text{CDCl}_3$ )

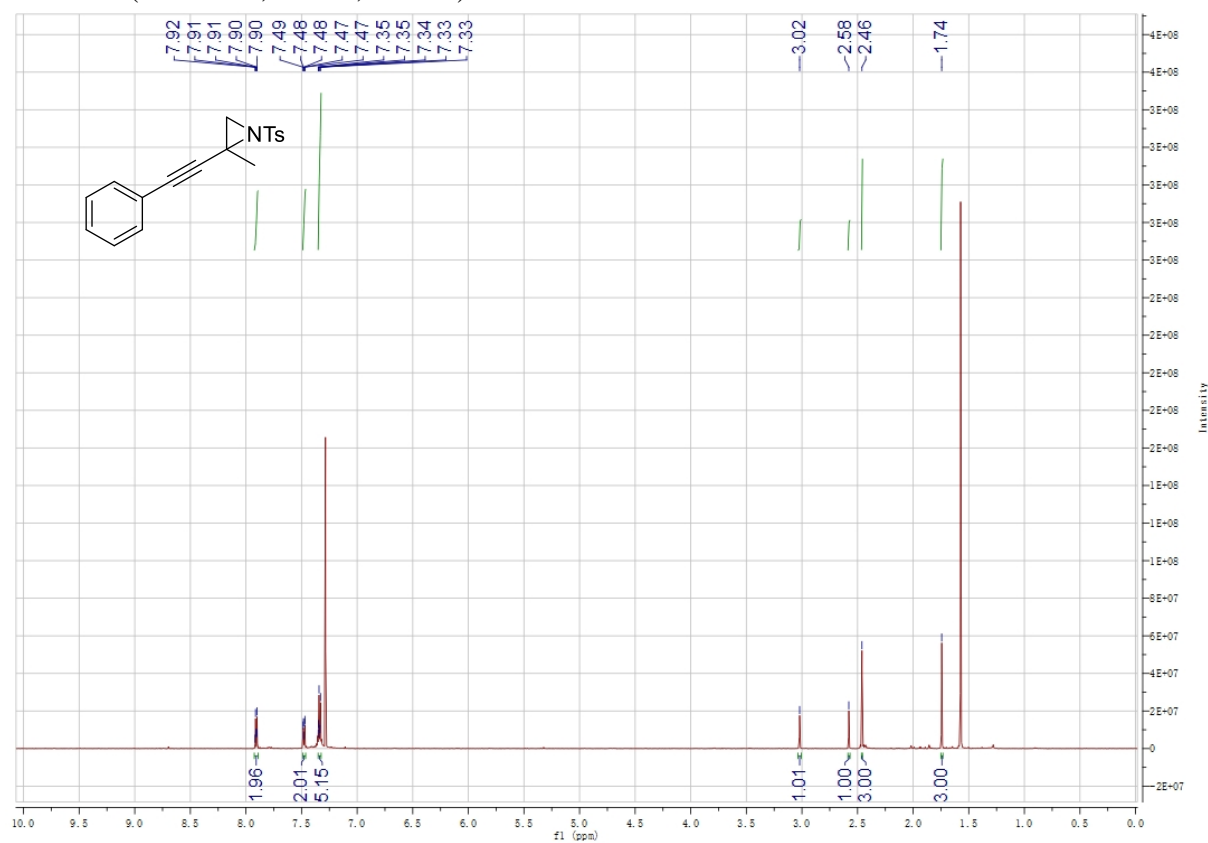

$^{13}\text{C}$  NMR (151 MHz, 293 K,  $\text{CDCl}_3$ )

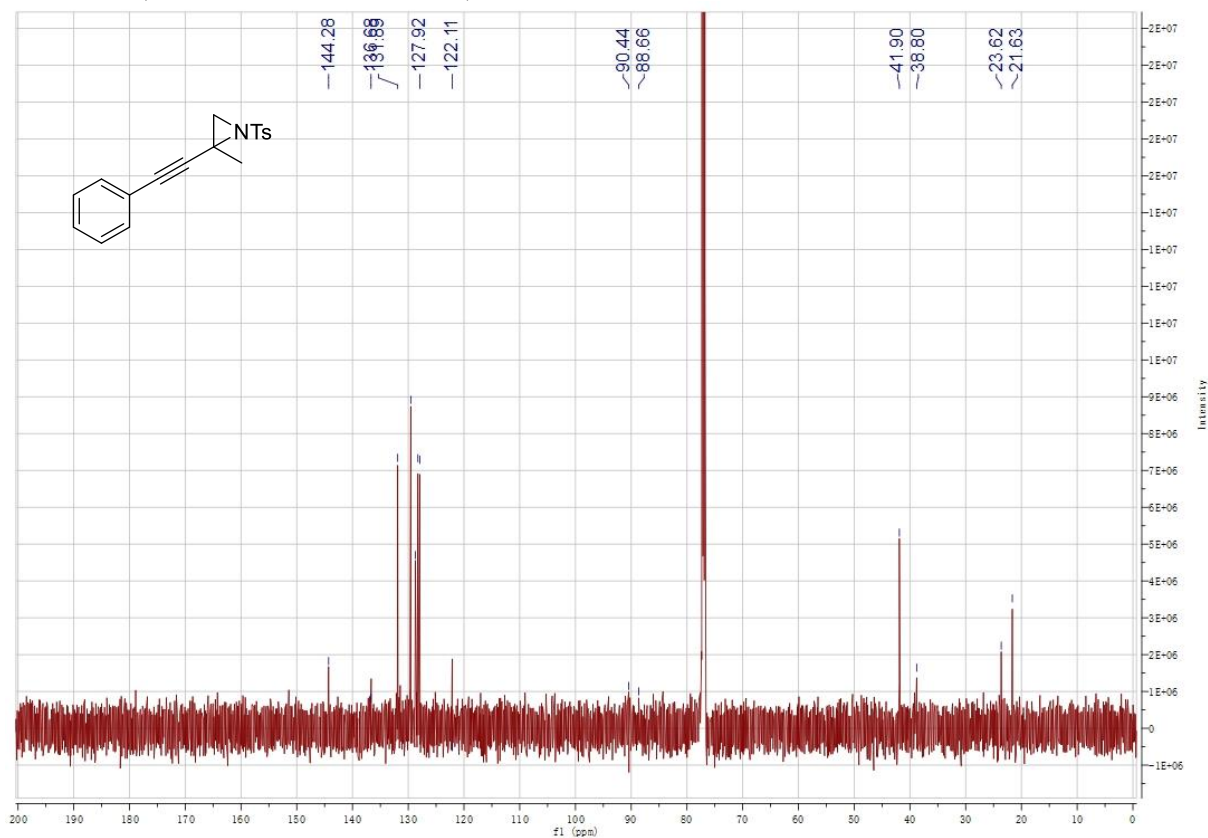

**Supplementary Figure 61. 2-Cyclopentyl-2-methyl-1-tosylaziridine (**11w**)**

$^1\text{H}$  NMR (600 MHz, 293 K,  $\text{CDCl}_3$ )

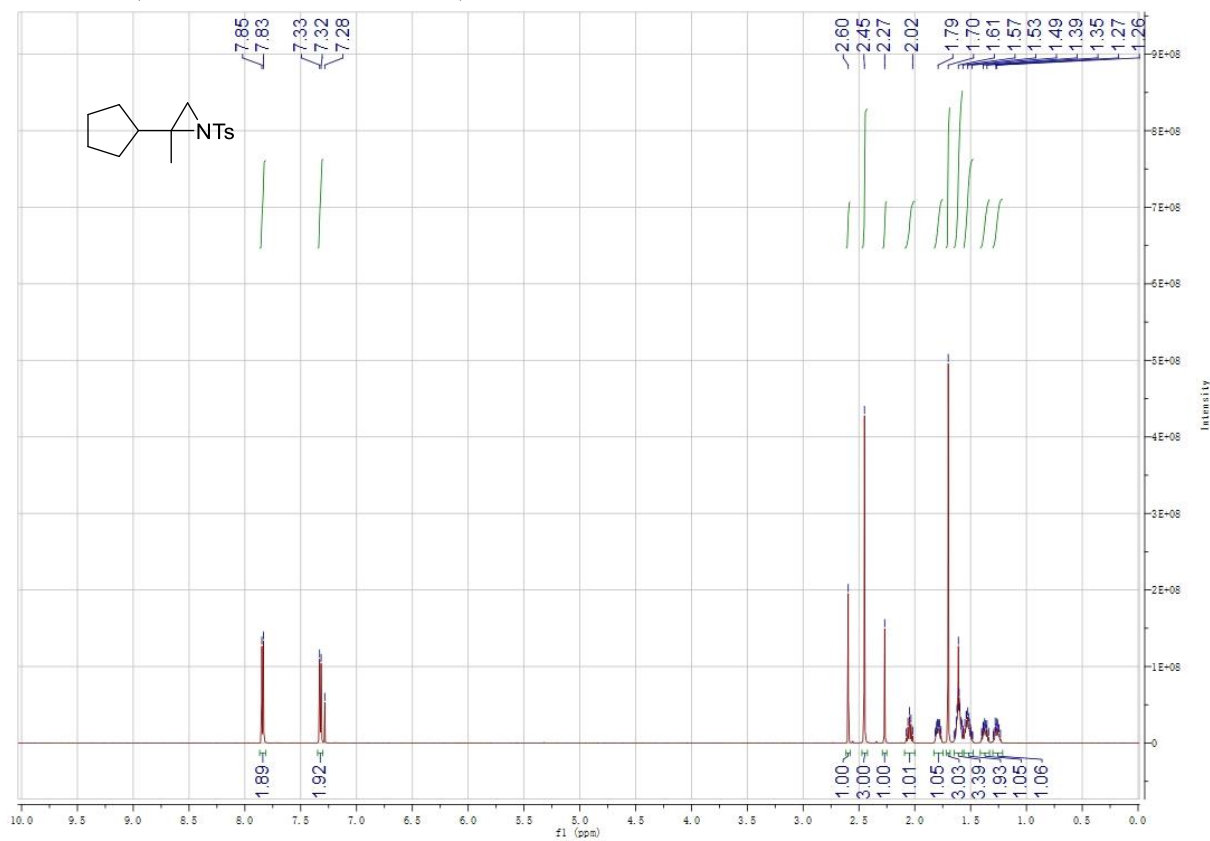

$^{13}\text{C}$  NMR (151 MHz, 293 K,  $\text{CDCl}_3$ )

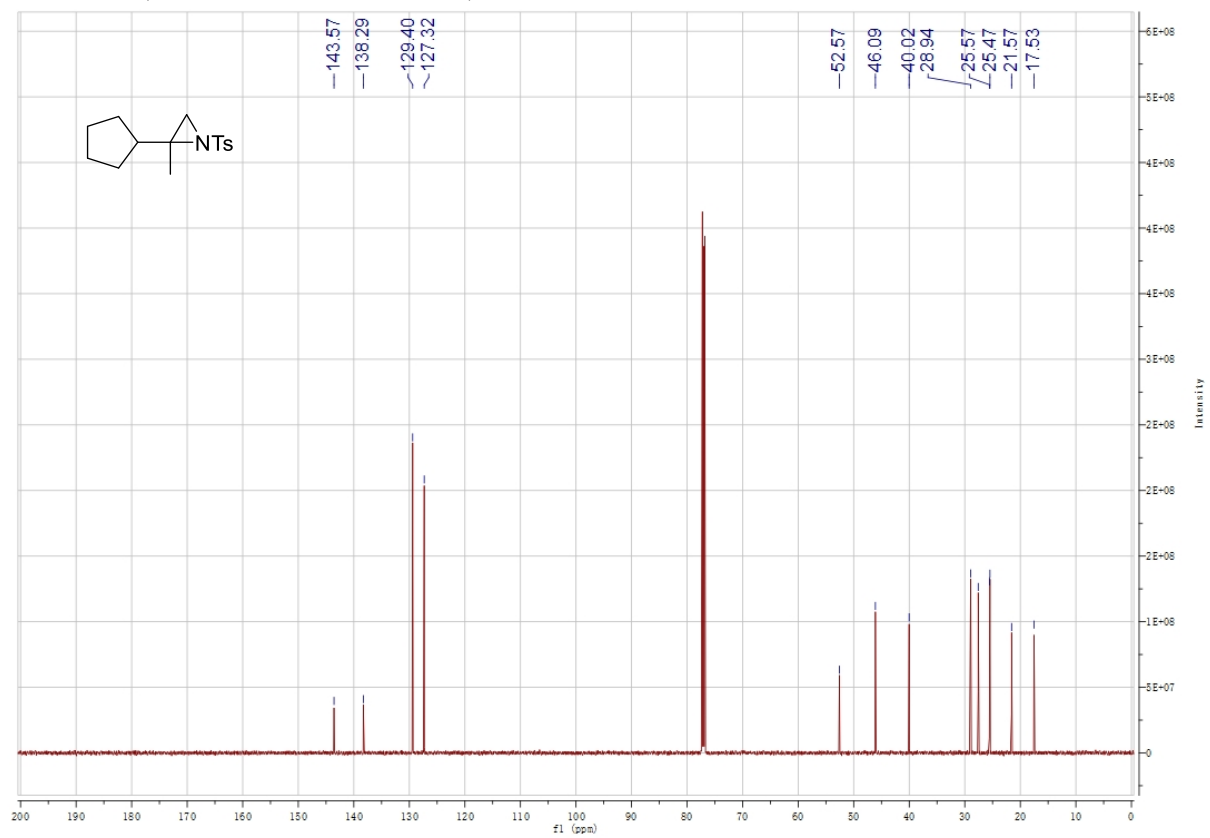



**Supplementary Figure 62. 2-Cyclohexyl-2-methyl-1-tosylaziridine (11x)**

$^1\text{H}$  NMR (600 MHz, 293 K,  $\text{CDCl}_3$ )

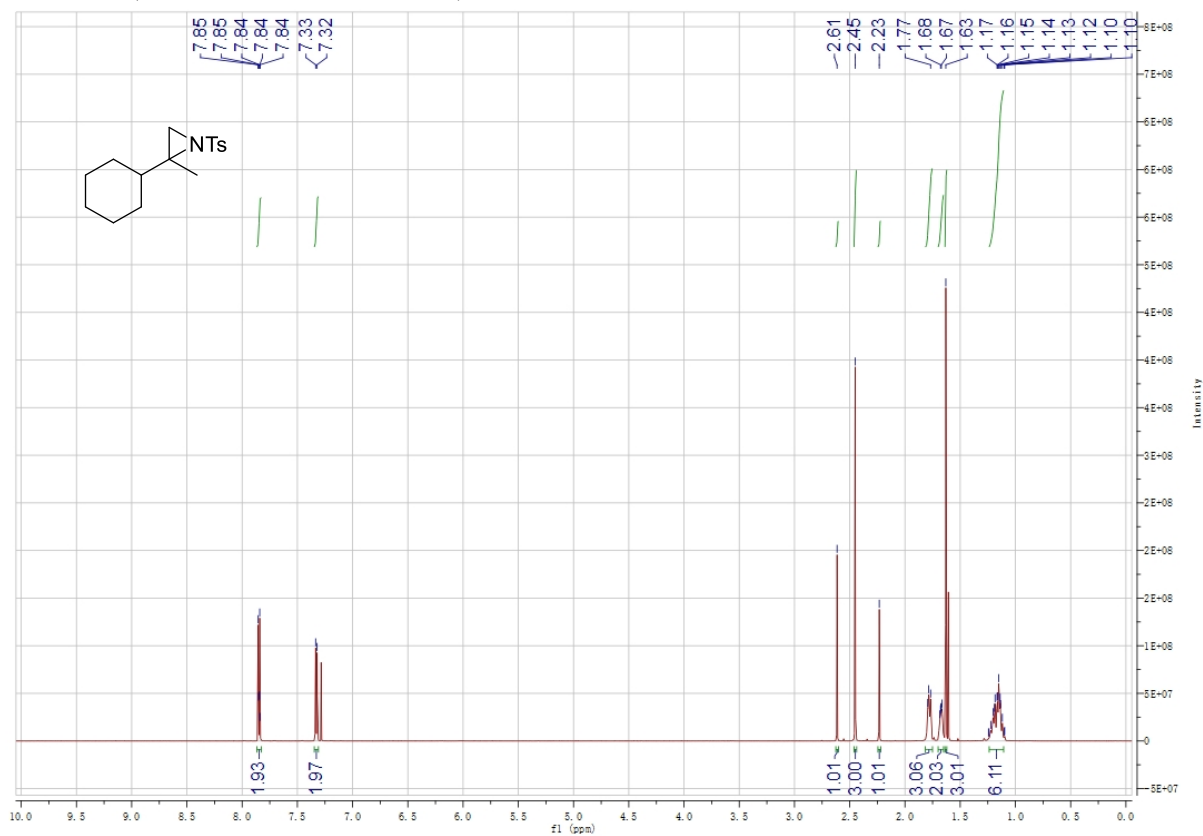

$^{13}\text{C}$  NMR (151 MHz, 293 K,  $\text{CDCl}_3$ )

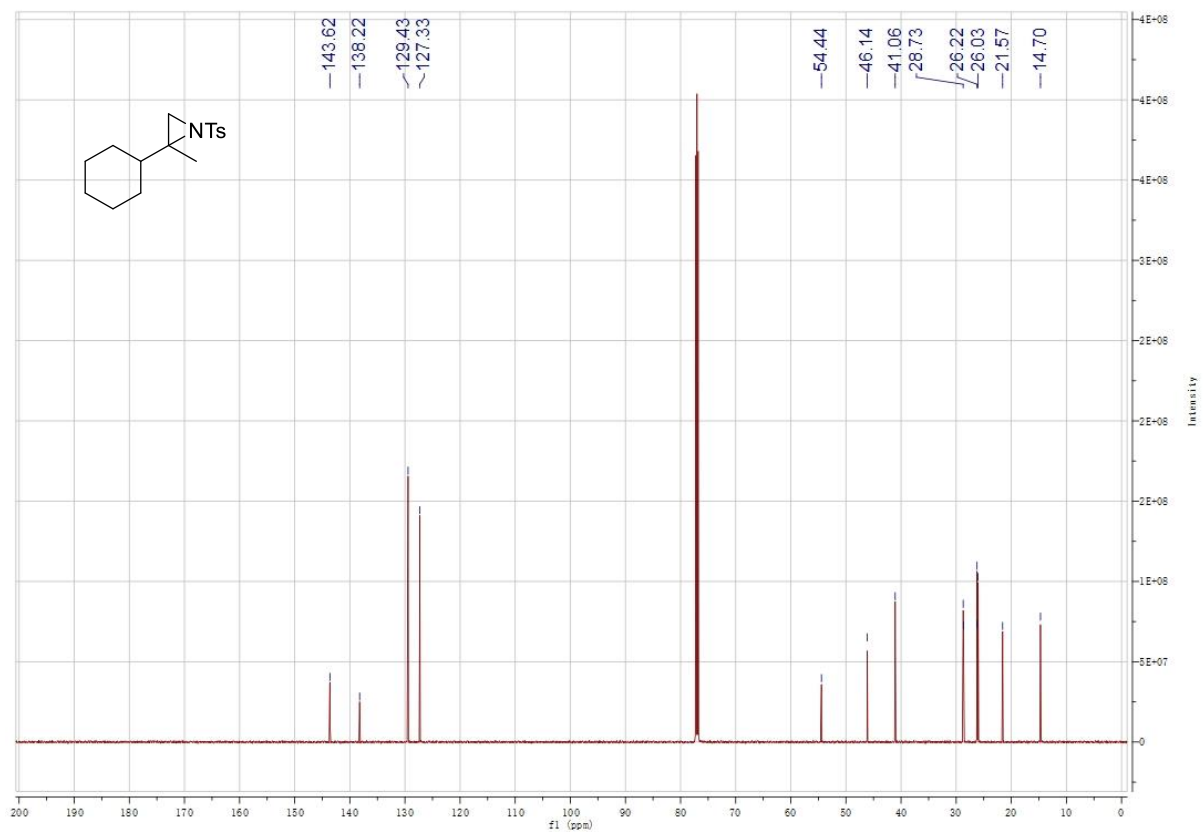

**Supplementary Figure 63.** 2-Methyl-2-(tetrahydro-2H-pyran-4-yl)-1-tosylaziridine (**11y**)  
 $^1\text{H}$  NMR (600 MHz, 293 K,  $\text{CDCl}_3$ )

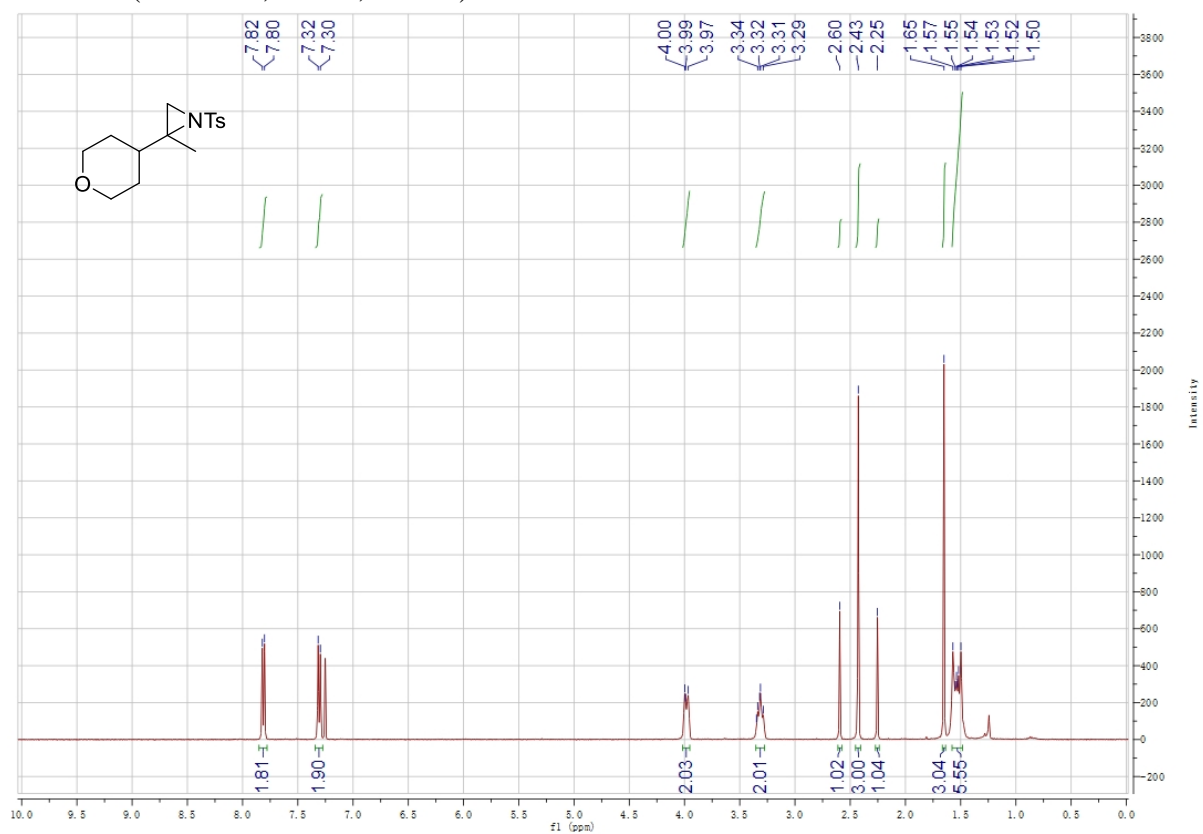

$^{13}\text{C}$  NMR (151 MHz, 293 K,  $\text{CDCl}_3$ )

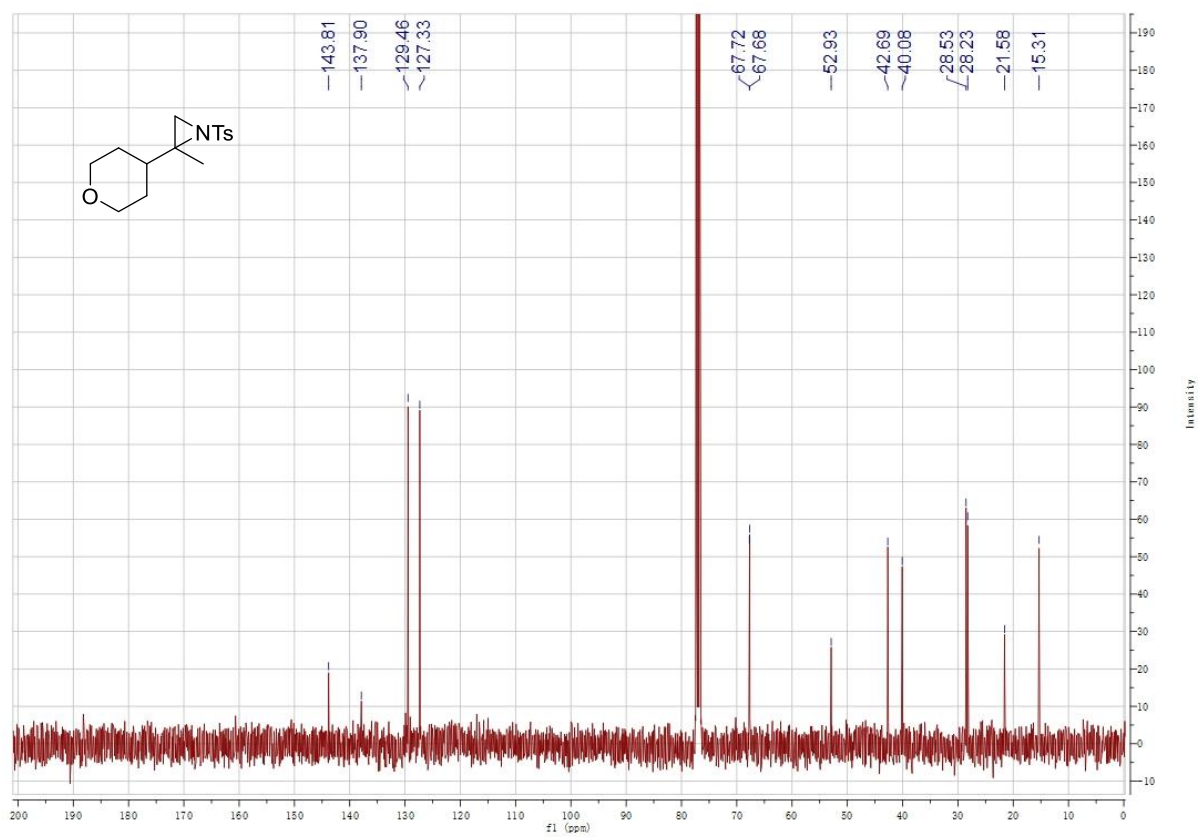

**Supplementary Figure 64. 2-(tert-Butyl)-2-methyl-1-tosylaziridine (11z)**

<sup>1</sup>H NMR (600 MHz, 293 K, CDCl<sub>3</sub>)

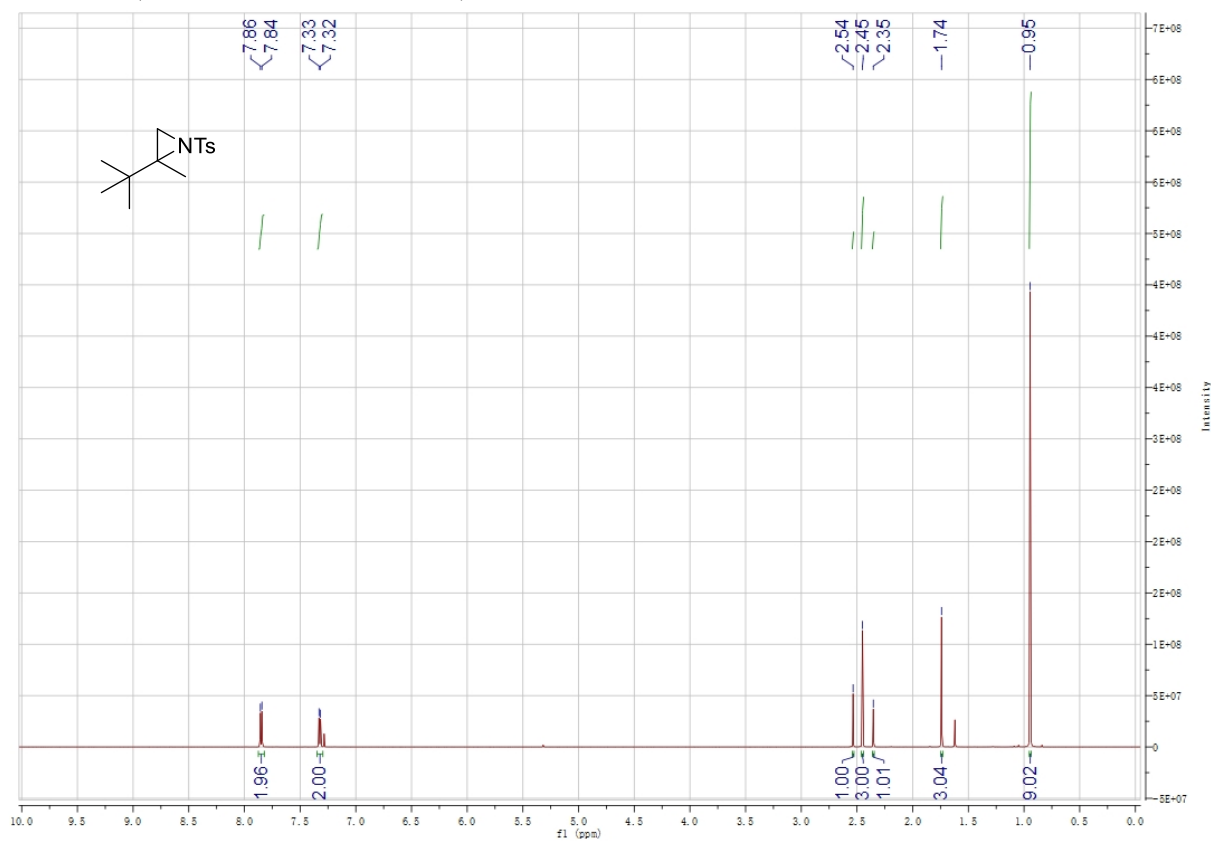

<sup>13</sup>C NMR (151 MHz, 293 K, CDCl<sub>3</sub>)

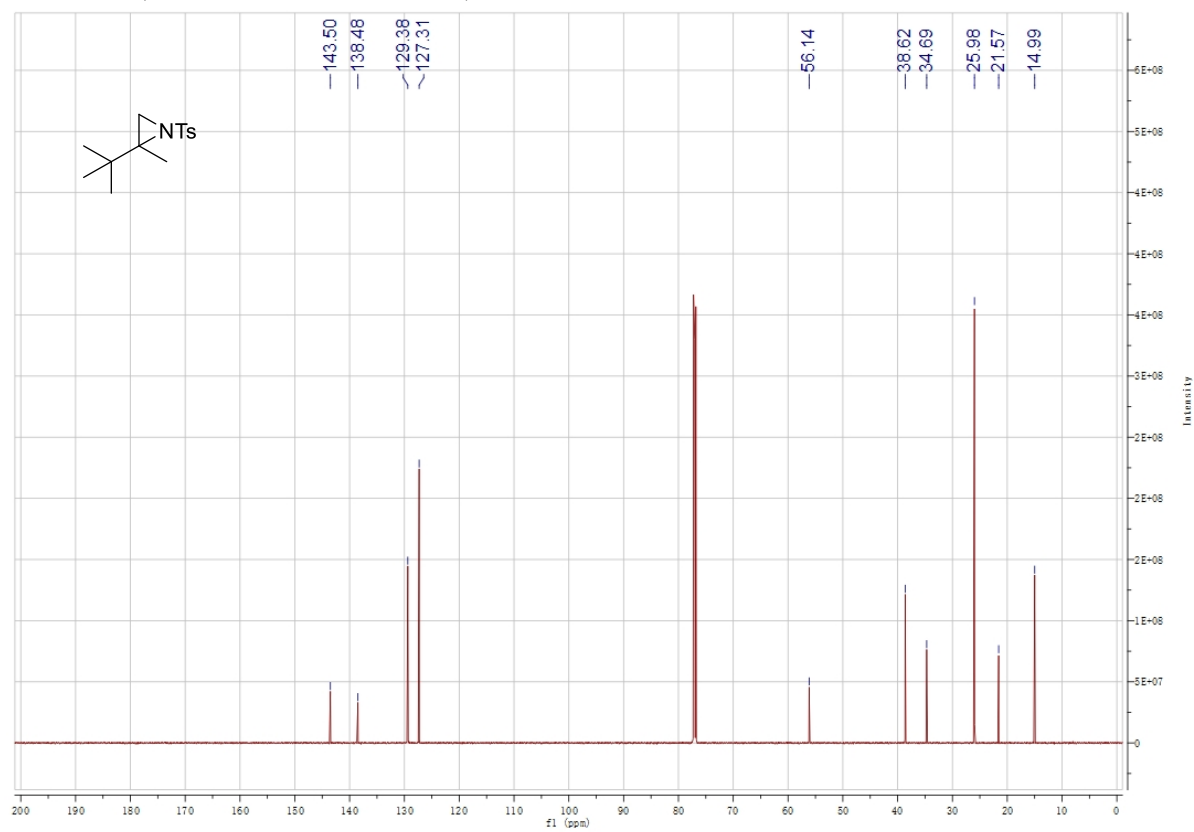

**Supplementary Figure 65. 2-Methyl-2-(1-phenylethyl)-1-tosylaziridine (11aa)**

<sup>1</sup>H NMR (600 MHz, 293 K, CDCl<sub>3</sub>)

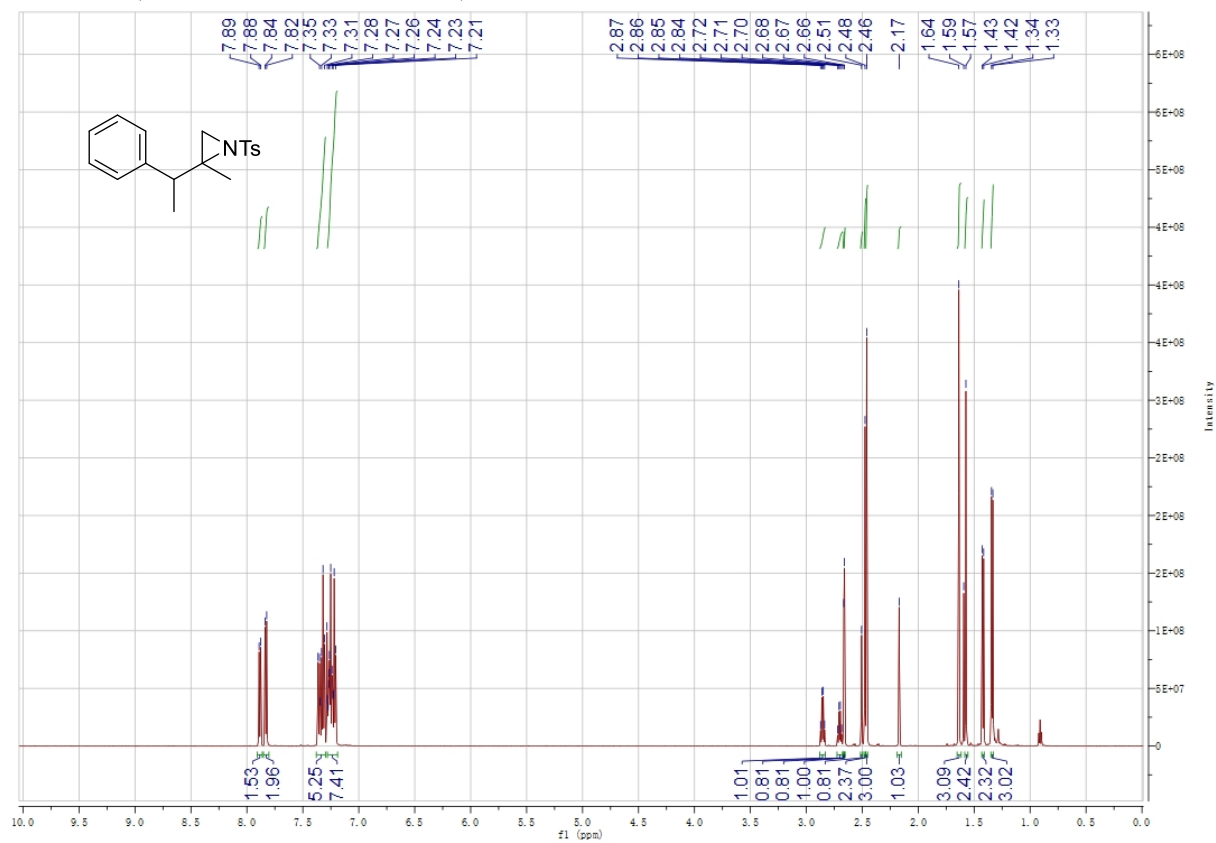

<sup>13</sup>C NMR (151 MHz, 293 K, CDCl<sub>3</sub>)

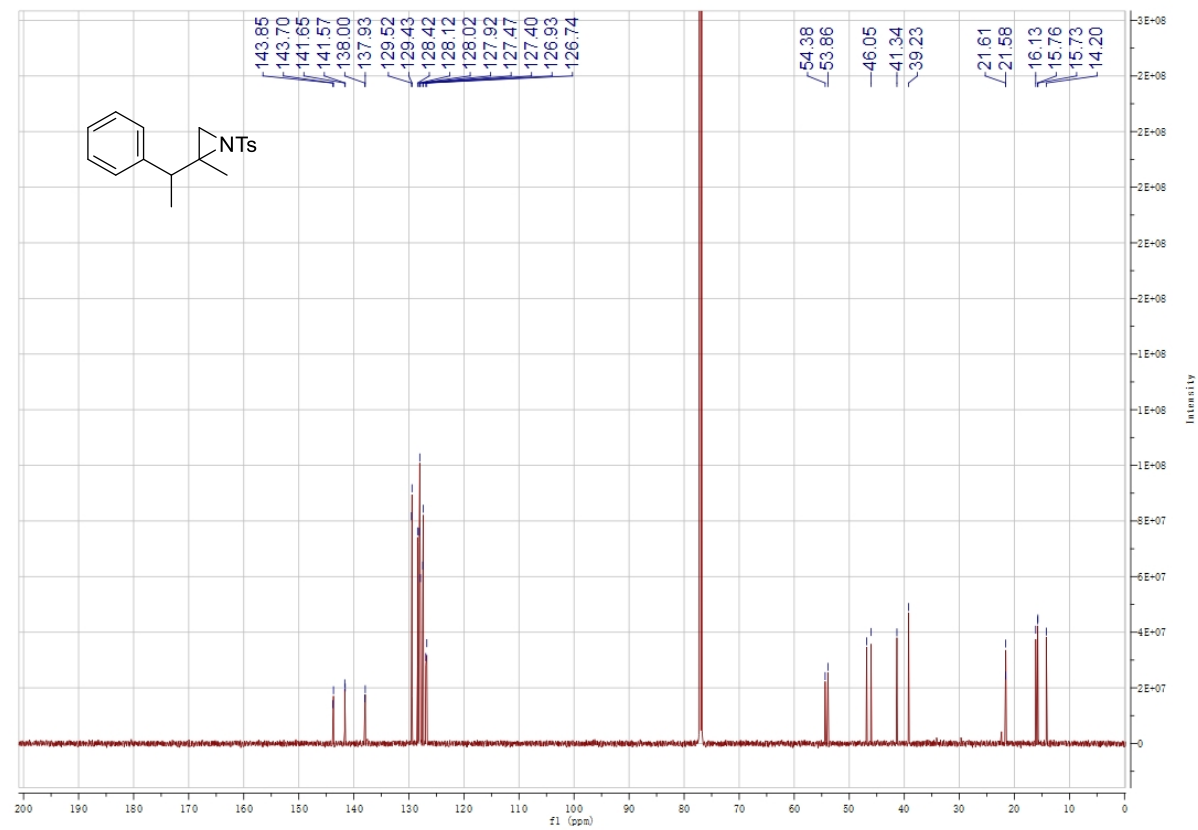

**Supplementary Figure 66. 2-Benzyl-2-methyl-1-tosylaziridine (11ab)**

<sup>1</sup>H NMR (600 MHz, 293 K, CDCl<sub>3</sub>)

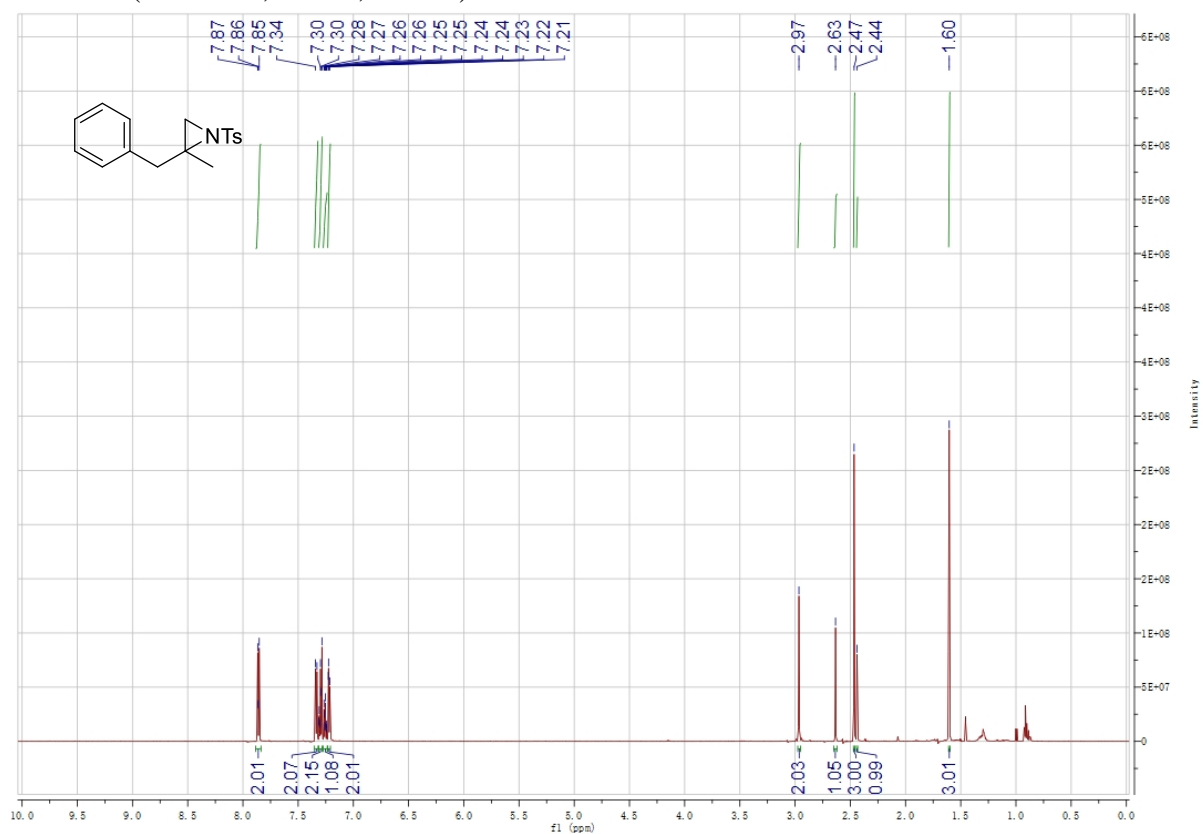

<sup>13</sup>C NMR (151 MHz, 293 K, CDCl<sub>3</sub>)

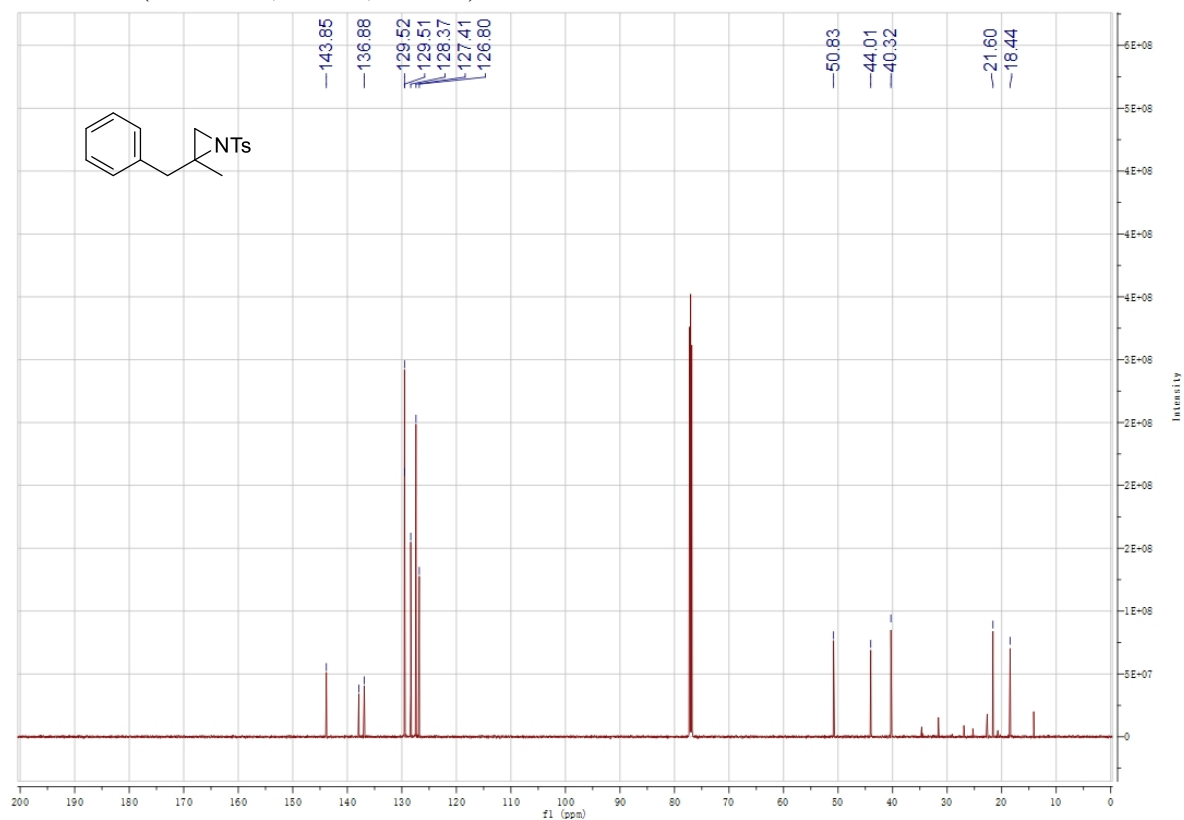

**Supplementary Figure 67. 2-Methyl-2-phenethyl-1-tosylaziridine (11ac)**

<sup>1</sup>H NMR (600 MHz, 293 K, CDCl<sub>3</sub>)

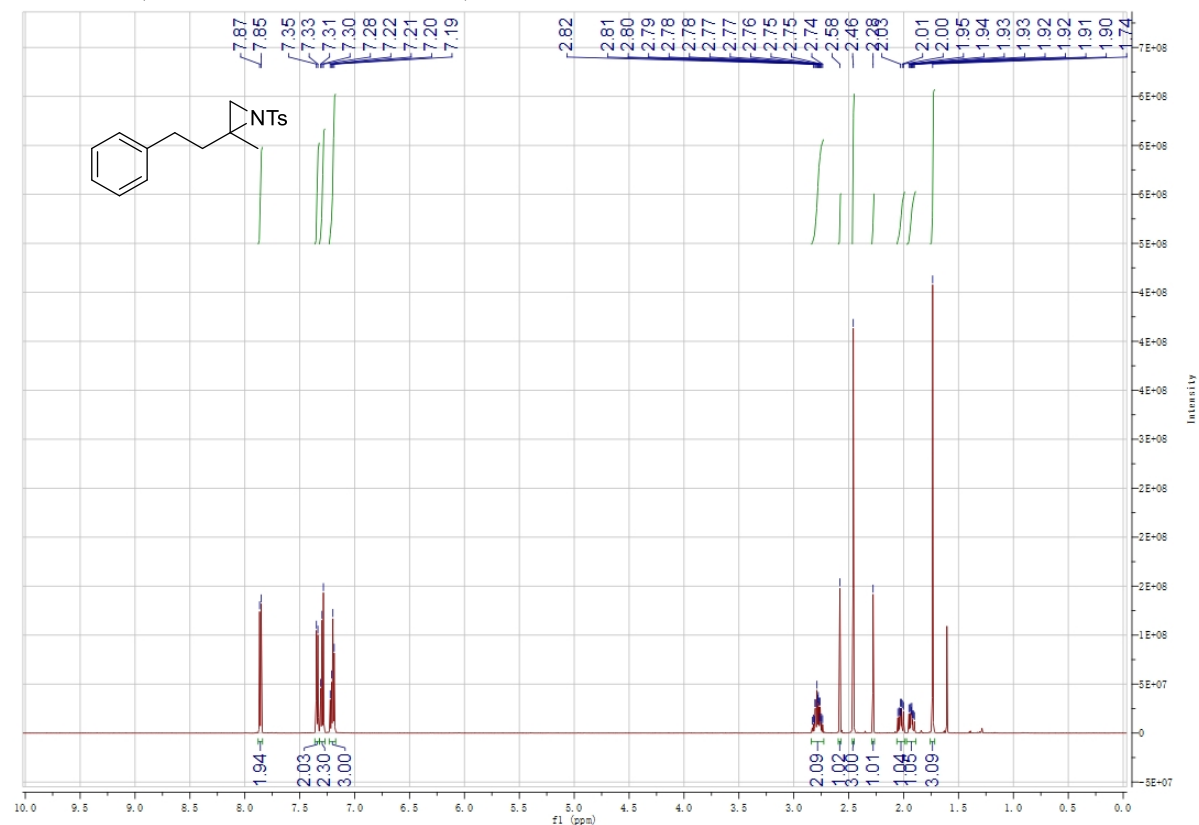

<sup>13</sup>C NMR (151 MHz, 293 K, CDCl<sub>3</sub>)

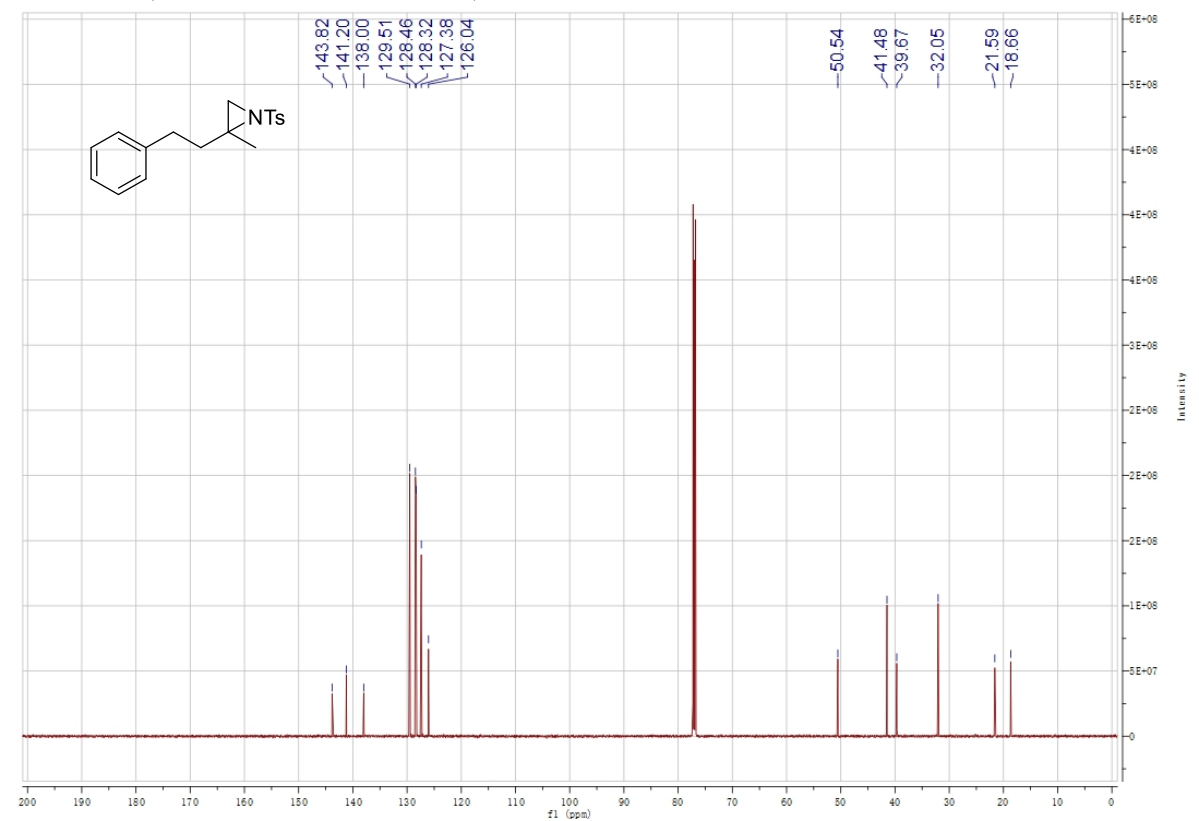

**Supplementary Figure 68. 2-Hexyl-2-methyl-1-tosylaziridine (11ad)**

$^1\text{H}$  NMR (600 MHz, 293 K,  $\text{CDCl}_3$ )

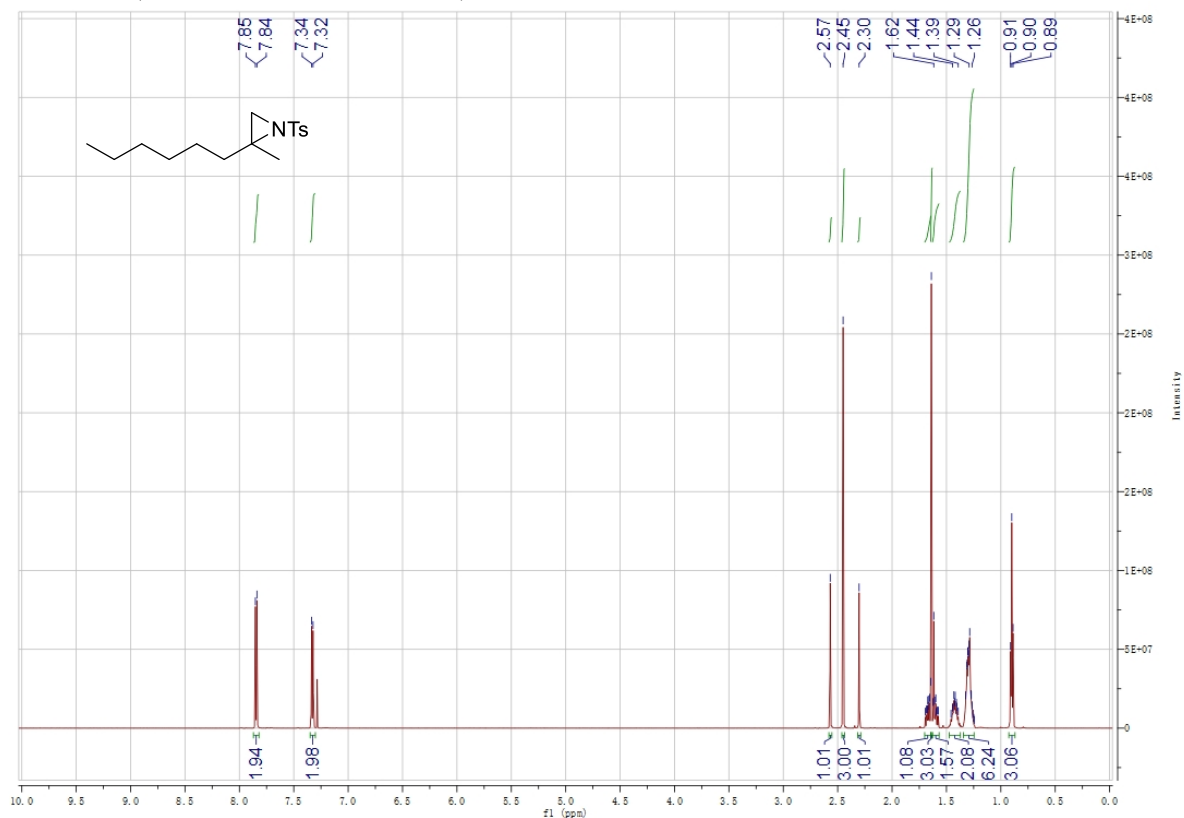

$^{13}\text{C}$  NMR (151 MHz, 293 K,  $\text{CDCl}_3$ )

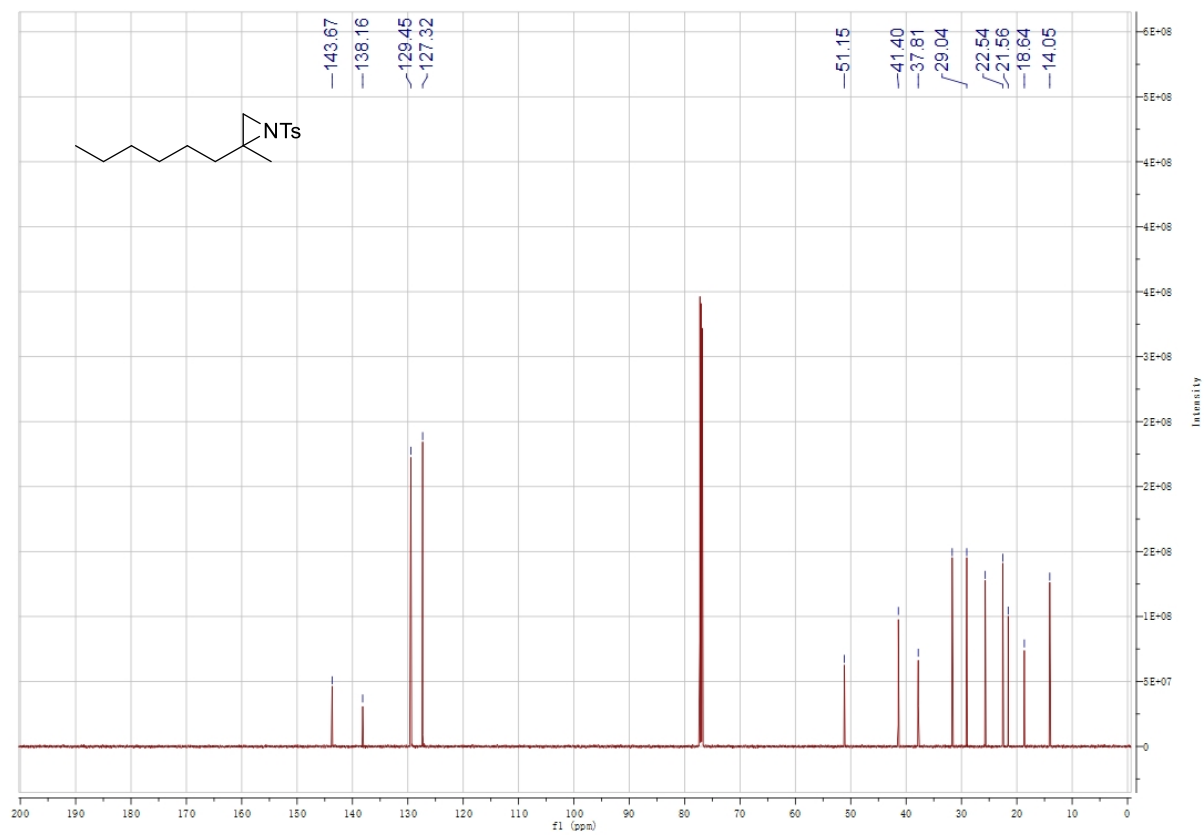

**Supplementary Figure 69. 2-Ethyl-2-phenyl-1-tosylaziridine (14)**

<sup>1</sup>H NMR (400 MHz, 293 K, CDCl<sub>3</sub>)

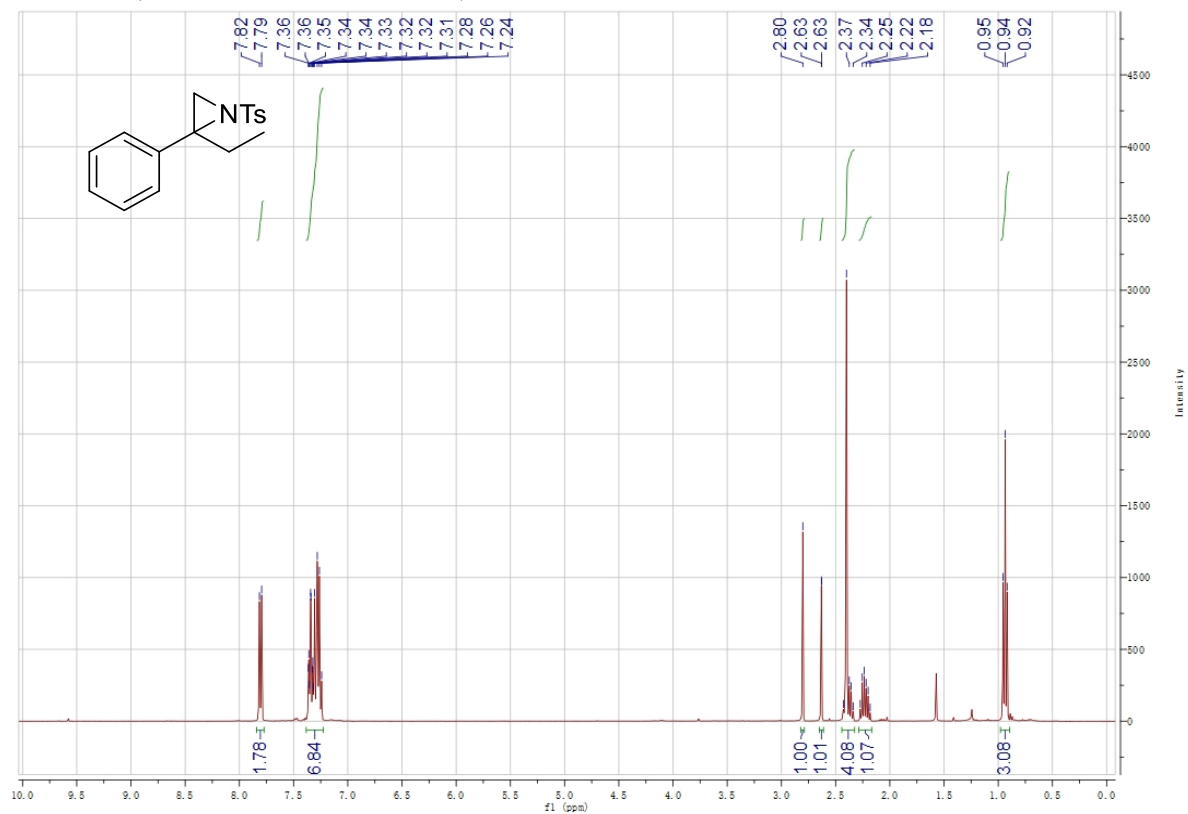

<sup>13</sup>C NMR (101 MHz, 293 K, CDCl<sub>3</sub>)

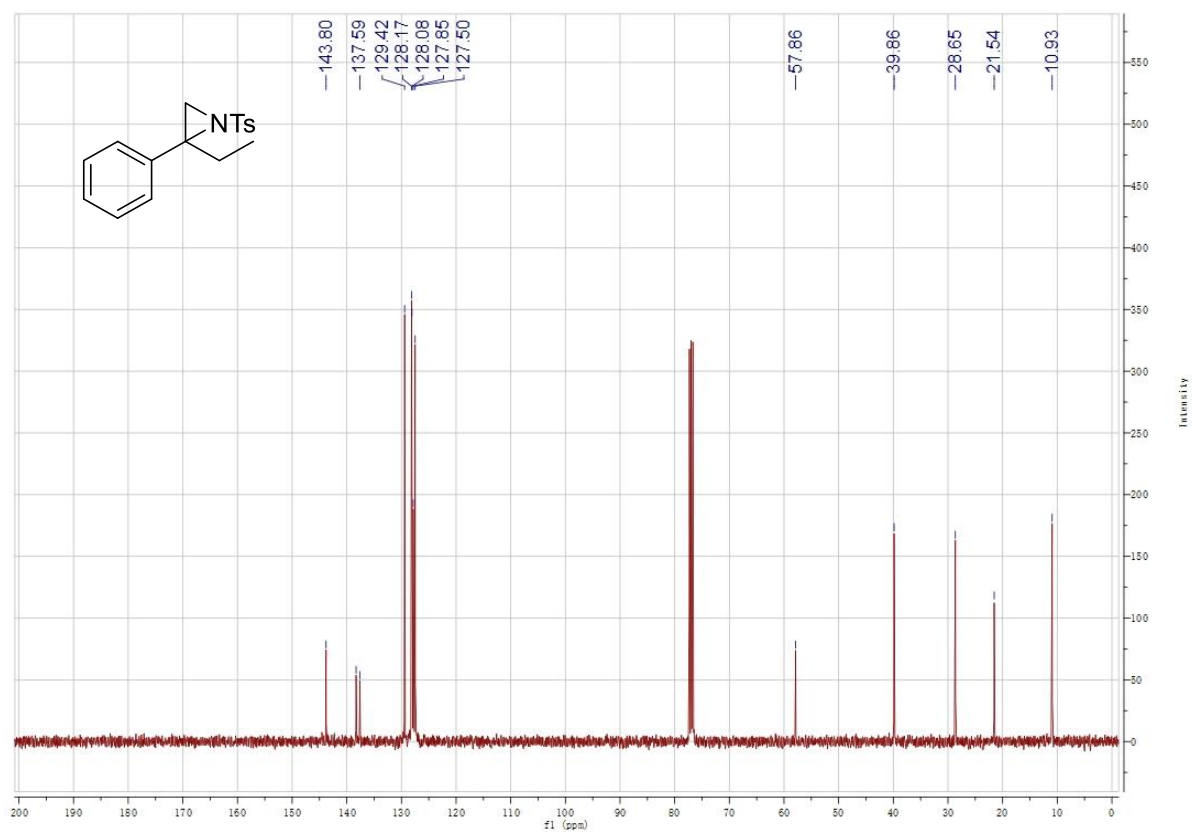



**Supplementary Figure 70. (2R,3R)-2-Methyl-3-phenyl-1-tosylaziridine (20a)**

From Z- $\beta$ -methyl styrene

$^1\text{H}$  NMR (600 MHz, 293 K,  $\text{CDCl}_3$ )

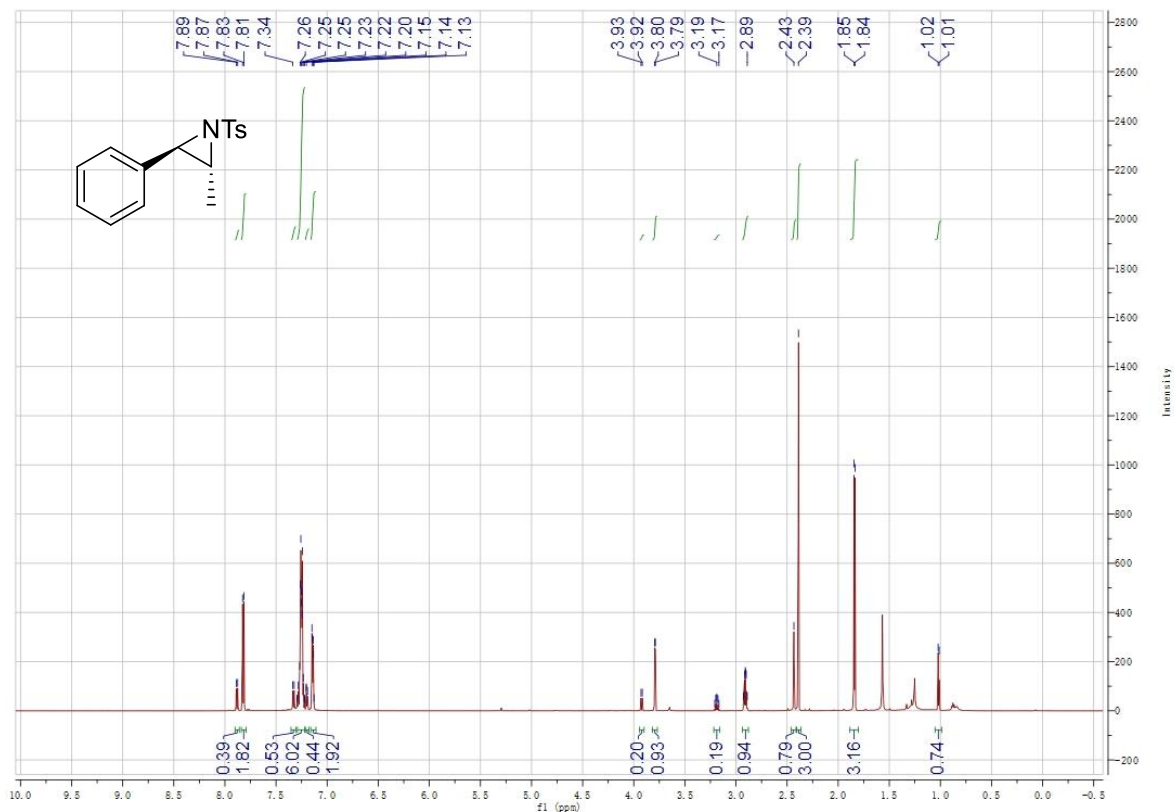

$^{13}\text{C}$  NMR (151 MHz, 293 K,  $\text{CDCl}_3$ )

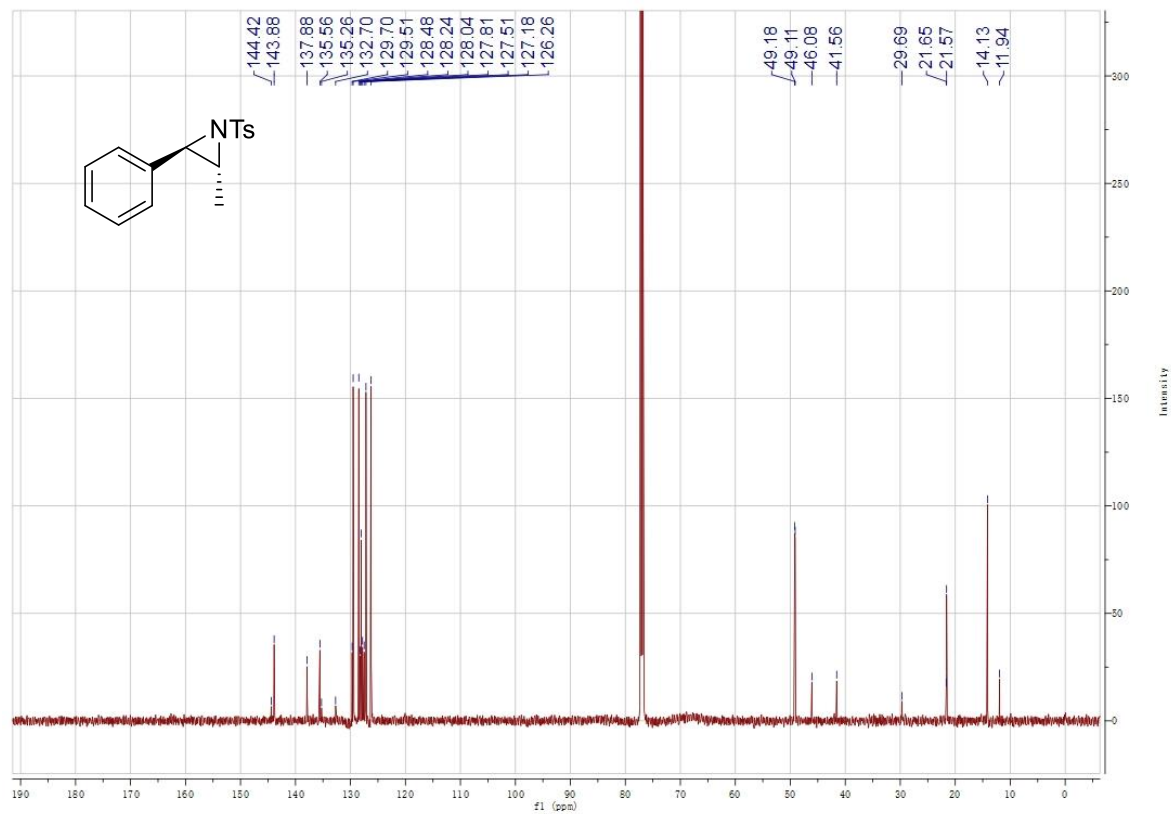

From E- $\beta$ -methyl styrene  
 $^1\text{H}$  NMR (600 MHz, 293 K,  $\text{CDCl}_3$ )

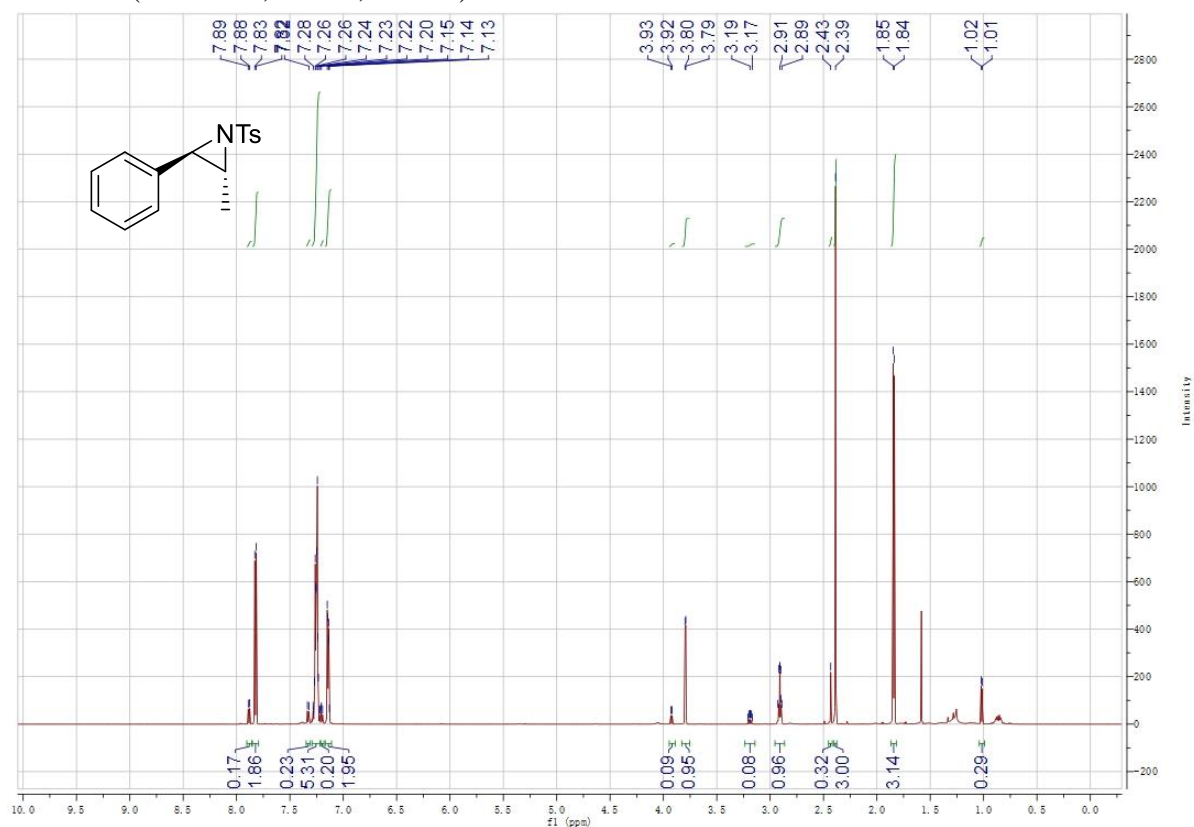

$^{13}\text{C}$  NMR (151 MHz, 293 K,  $\text{CDCl}_3$ )

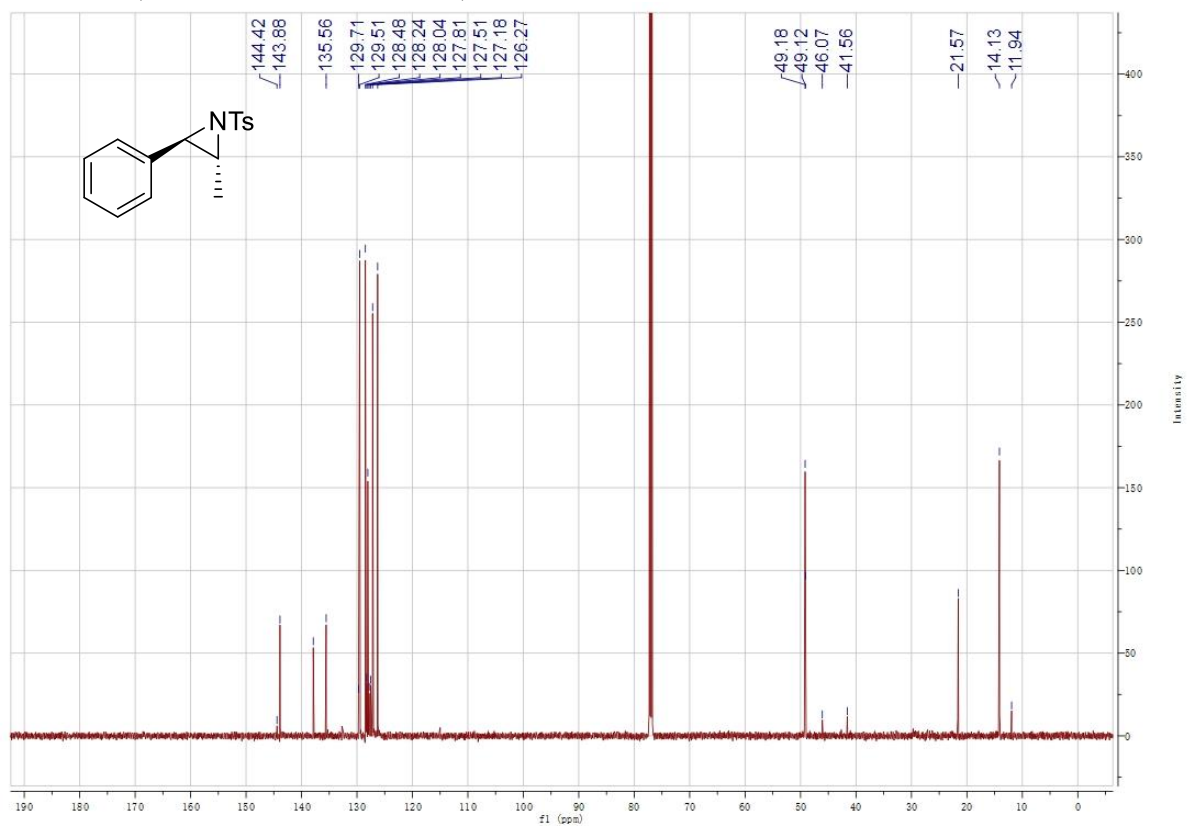

**Supplementary Figure 71.** (2*R*,3*R*)-2-(4-Bromophenyl)-3-methyl-1-tosylaziridine (**20b**)  
<sup>1</sup>H NMR (600 MHz, 293 K, CDCl<sub>3</sub>)

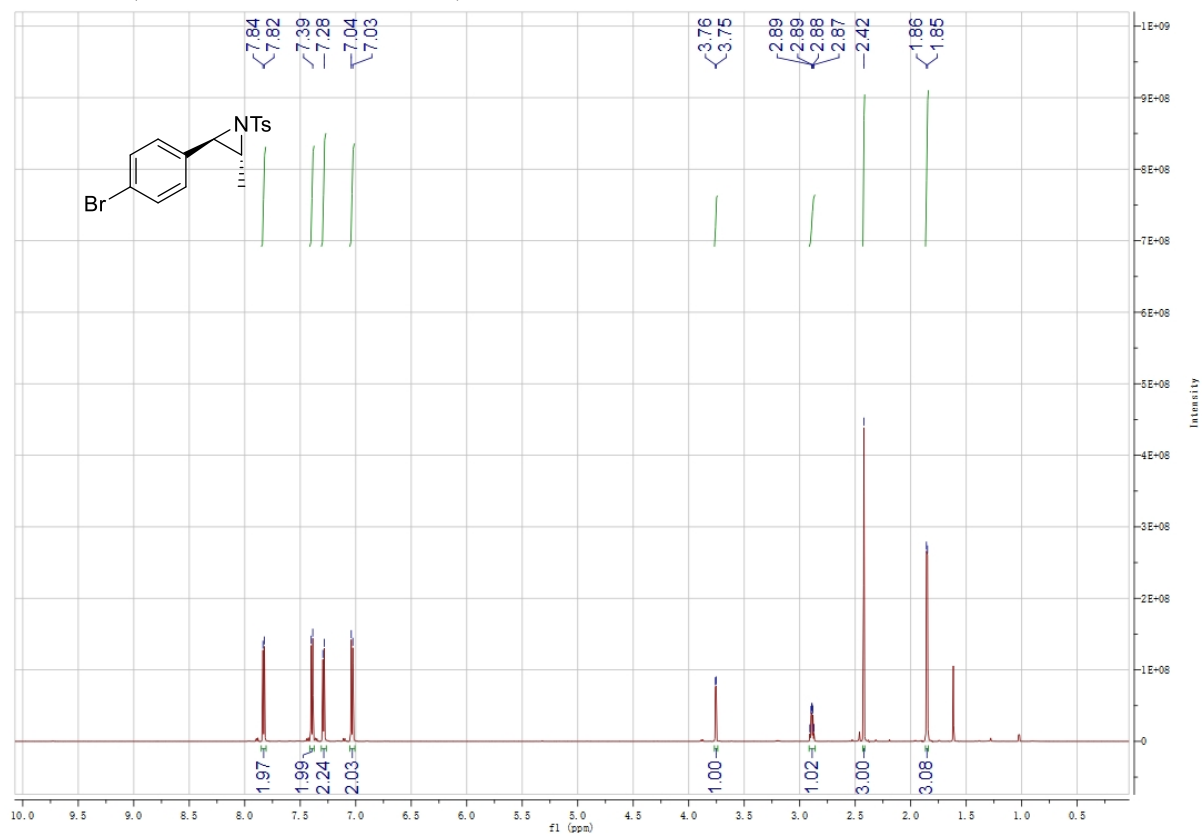

<sup>13</sup>C NMR (151 MHz, 293 K, CDCl<sub>3</sub>)

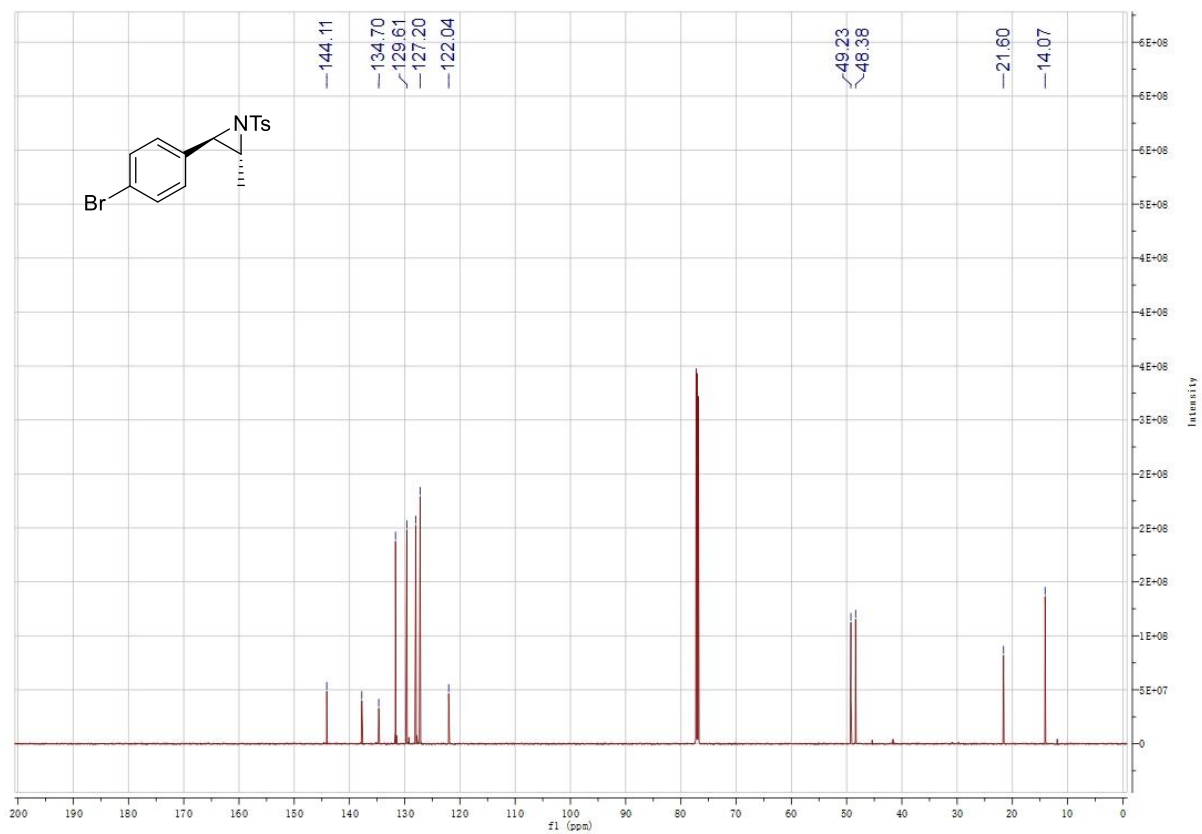

**Supplementary Figure 72.** (2*R*,3*R*)-2-Methyl-1-tosyl-3-(4-(trifluoromethyl)phenyl)aziridine (20*c*)

<sup>1</sup>H NMR (600 MHz, 293 K, CDCl<sub>3</sub>)

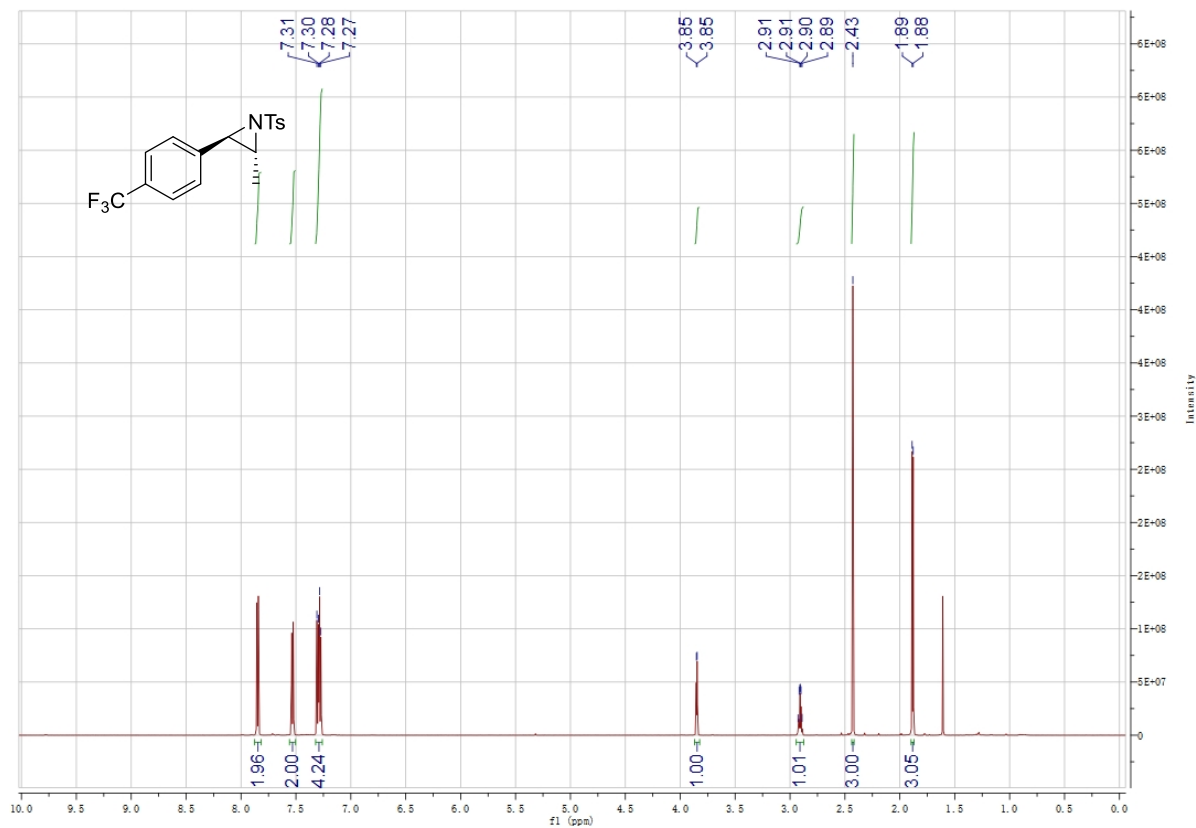

<sup>13</sup>C NMR (151 MHz, 293 K, CDCl<sub>3</sub>)

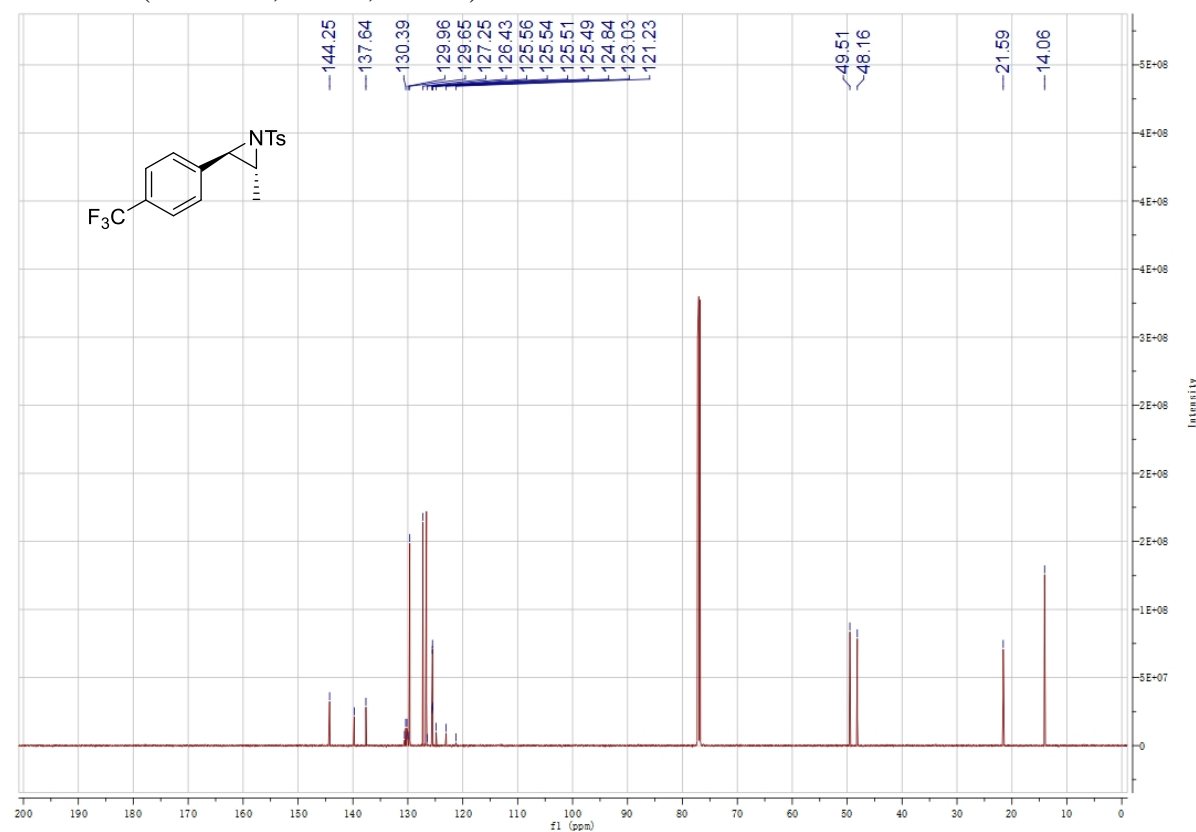

$^{19}\text{F}$  NMR (565 MHz, 293 K,  $\text{CDCl}_3$ )

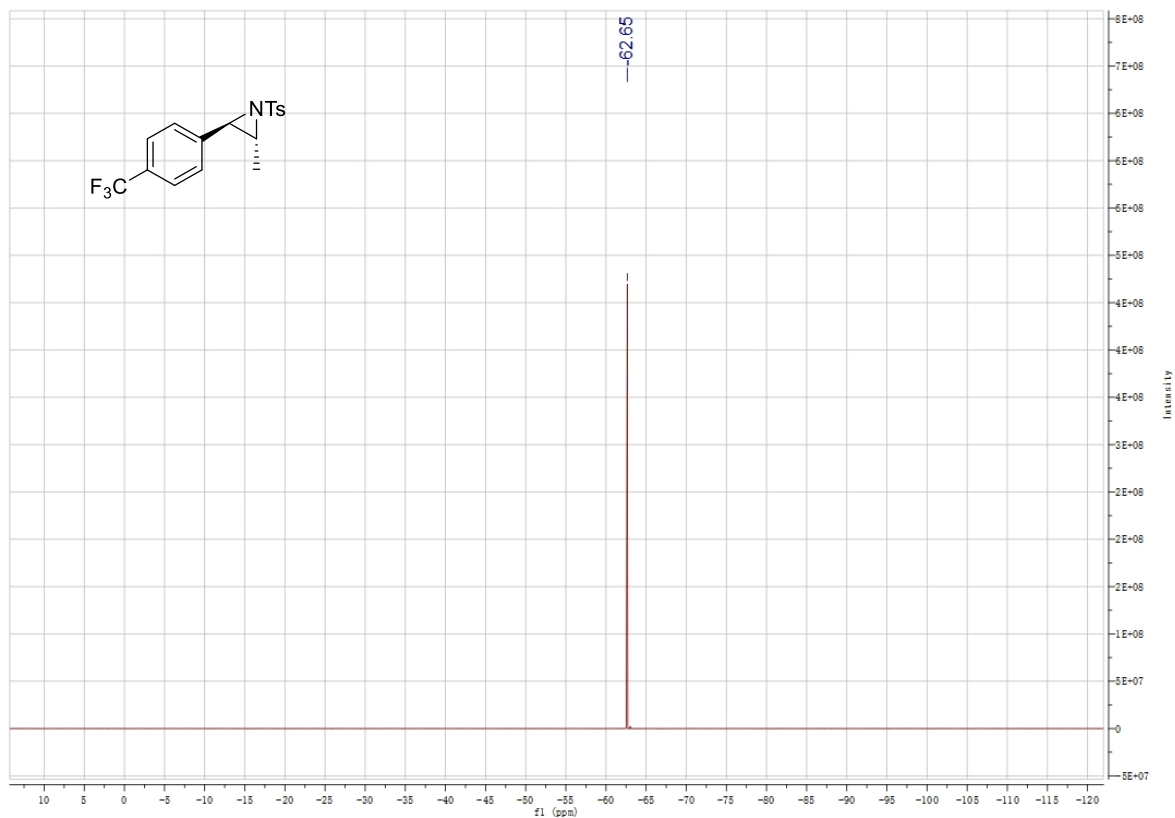

**Supplementary Figure 73.**

*(2R,3R)*-2-Methyl-1-tosyl-3-(4-(trifluoromethoxy)phenyl)aziridine (**20d**)

$^1\text{H}$  NMR (600 MHz, 293 K,  $\text{CDCl}_3$ )

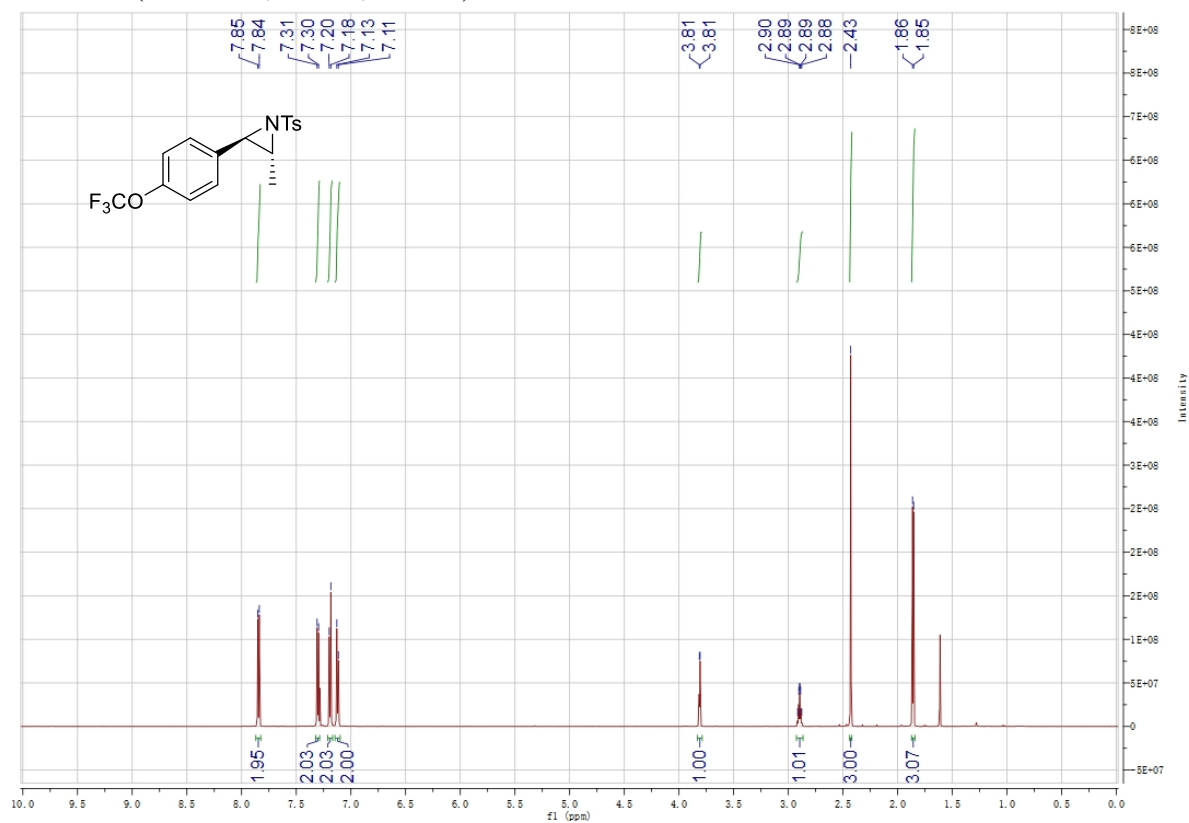

$^{13}\text{C}$  NMR (151 MHz, 293 K,  $\text{CDCl}_3$ )

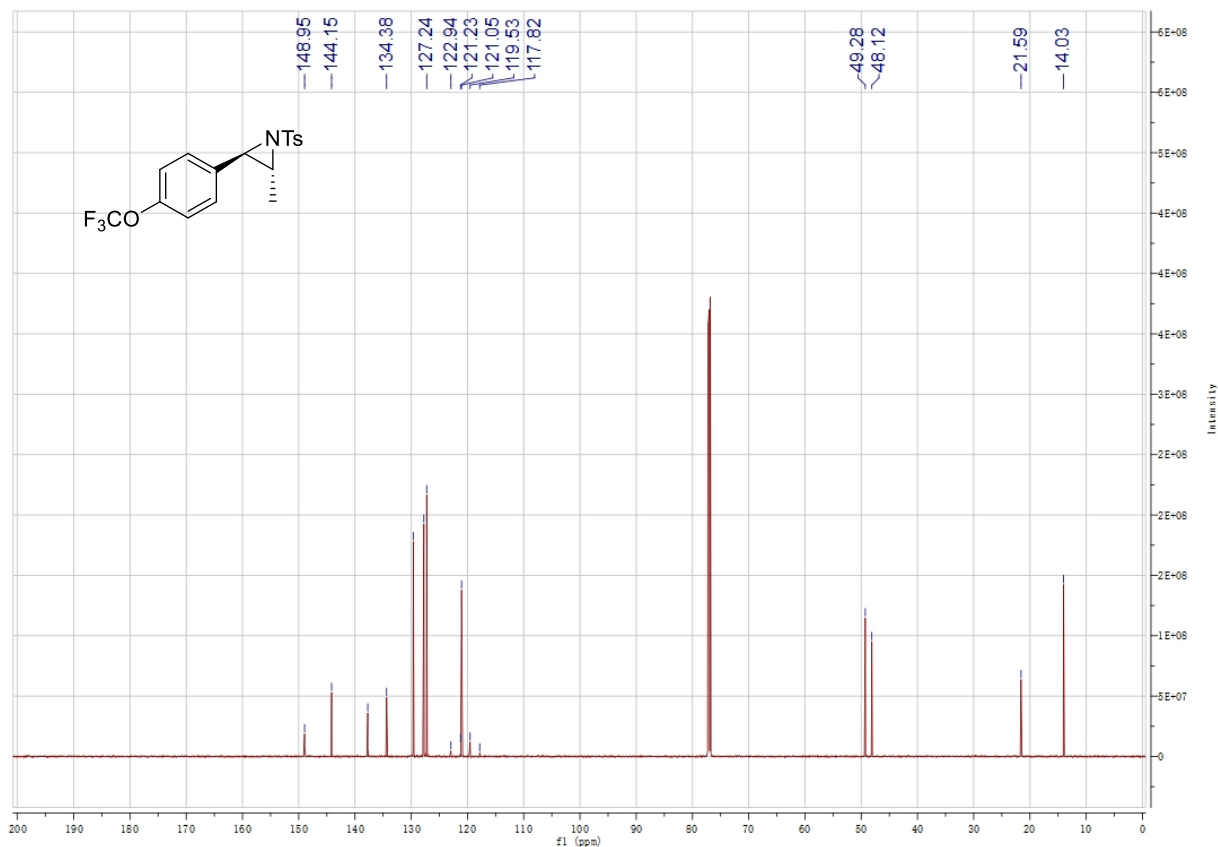

$^{19}\text{F}$  NMR (565 MHz, 293 K,  $\text{CDCl}_3$ )

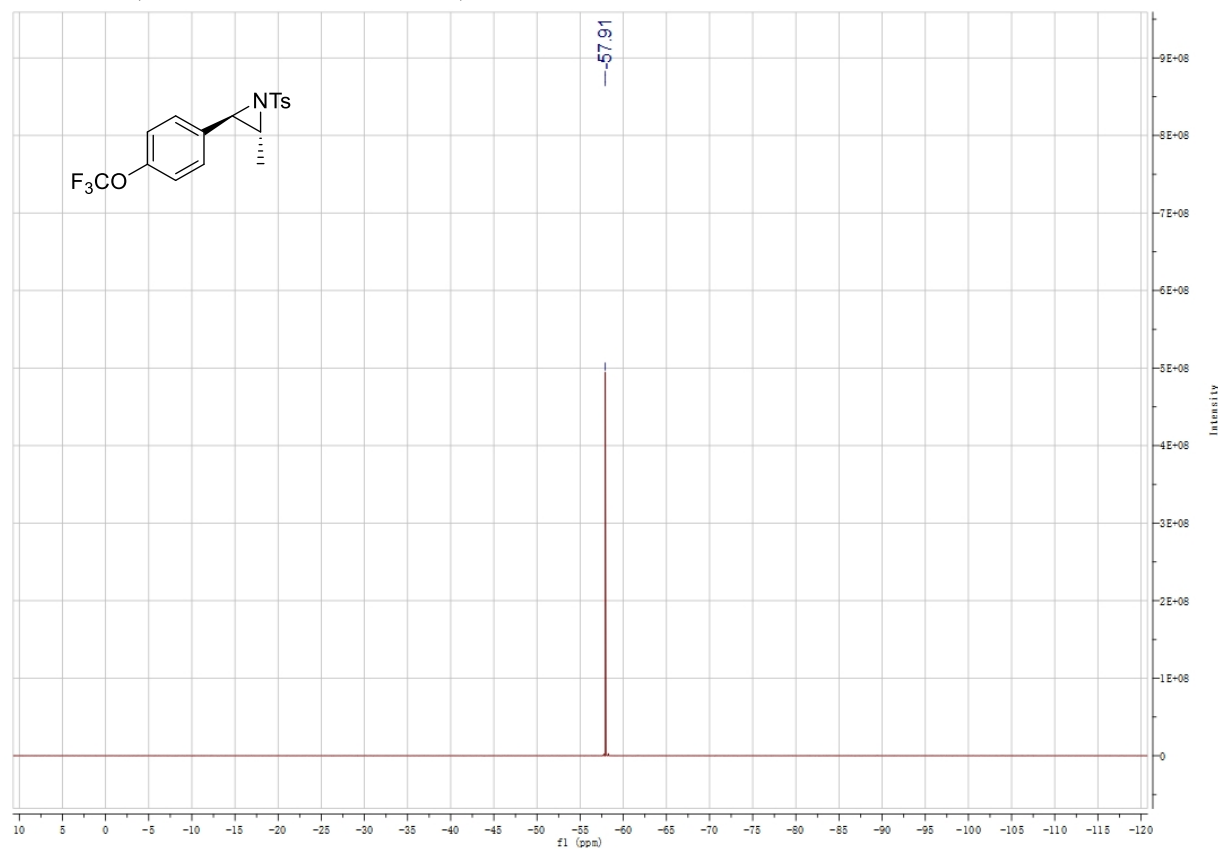

### Supplementary Figure 74.

(2*R*,3*R*)-2-Methyl-1-tosyl-3-(3-(trifluoromethoxy)phenyl)aziridine (**20e**)

<sup>1</sup>H NMR (600 MHz, 293 K, CDCl<sub>3</sub>)

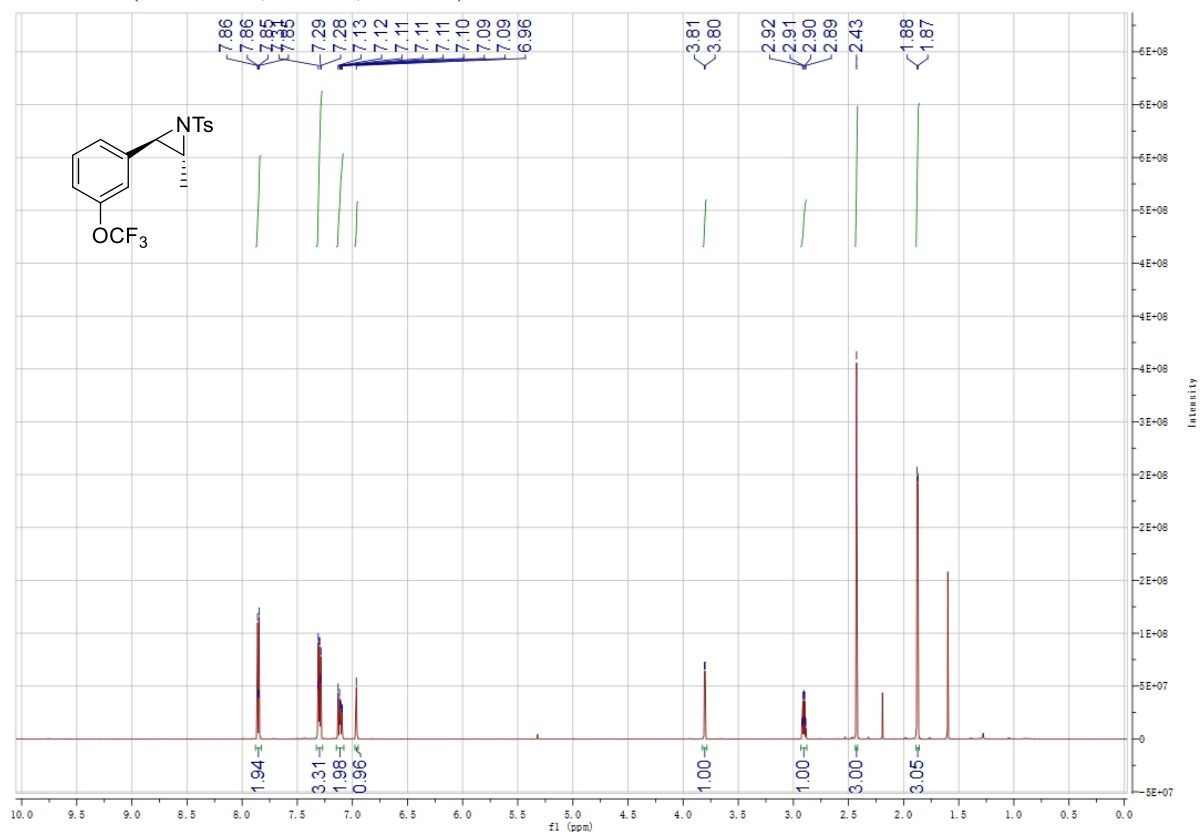

<sup>13</sup>C NMR (151 MHz, 293 K, CDCl<sub>3</sub>)

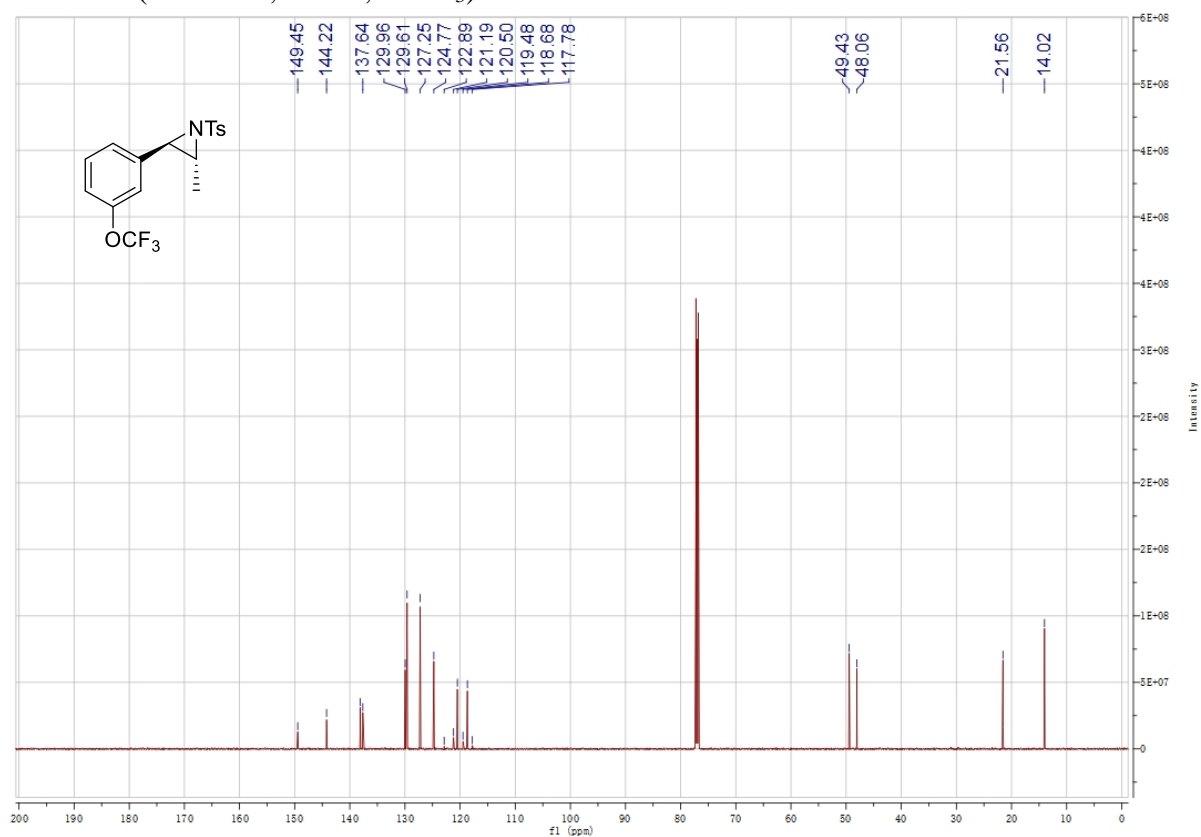

$^{19}\text{F}$  NMR (565 MHz, 293 K,  $\text{CDCl}_3$ )

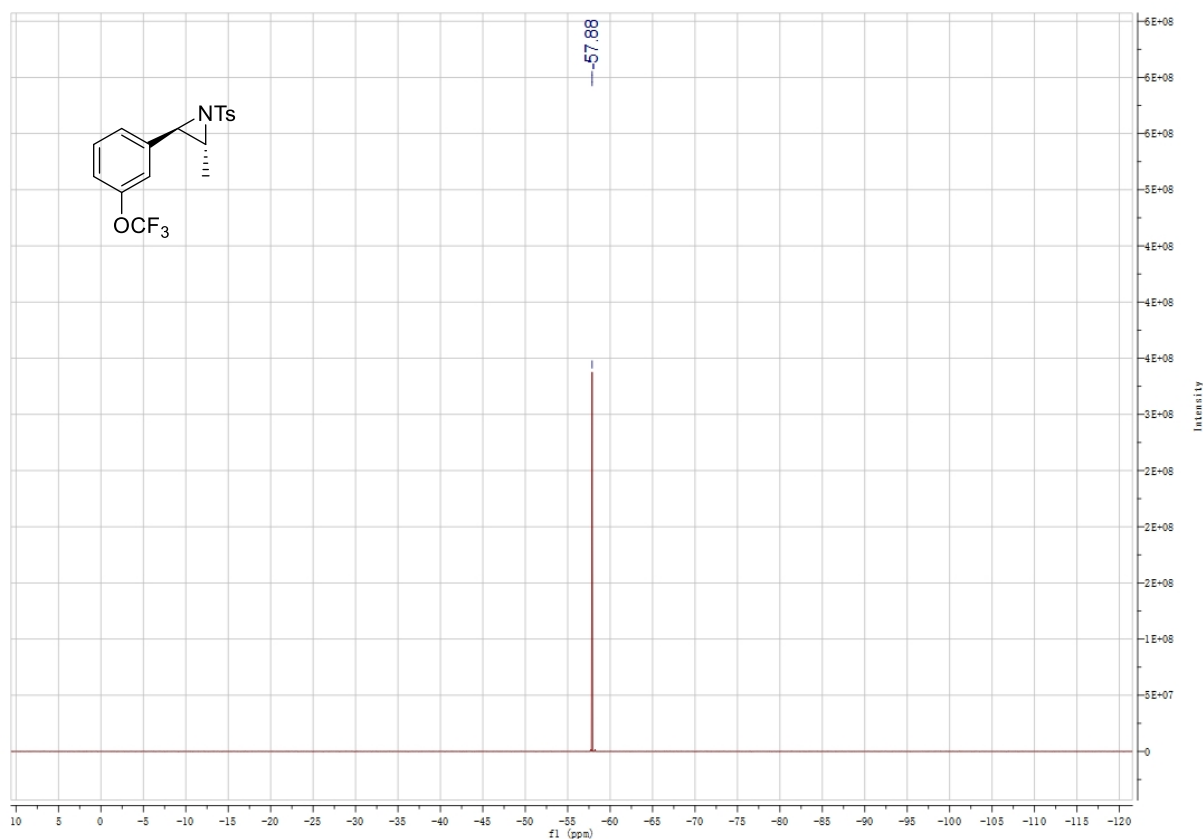

**Supplementary Figure 75.** *(2R,3R)*-2-(2-Bromophenyl)-3-methyl-1-tosylaziridine (**20f**)  
 $^1\text{H}$  NMR (600 MHz, 293 K,  $\text{CDCl}_3$ )

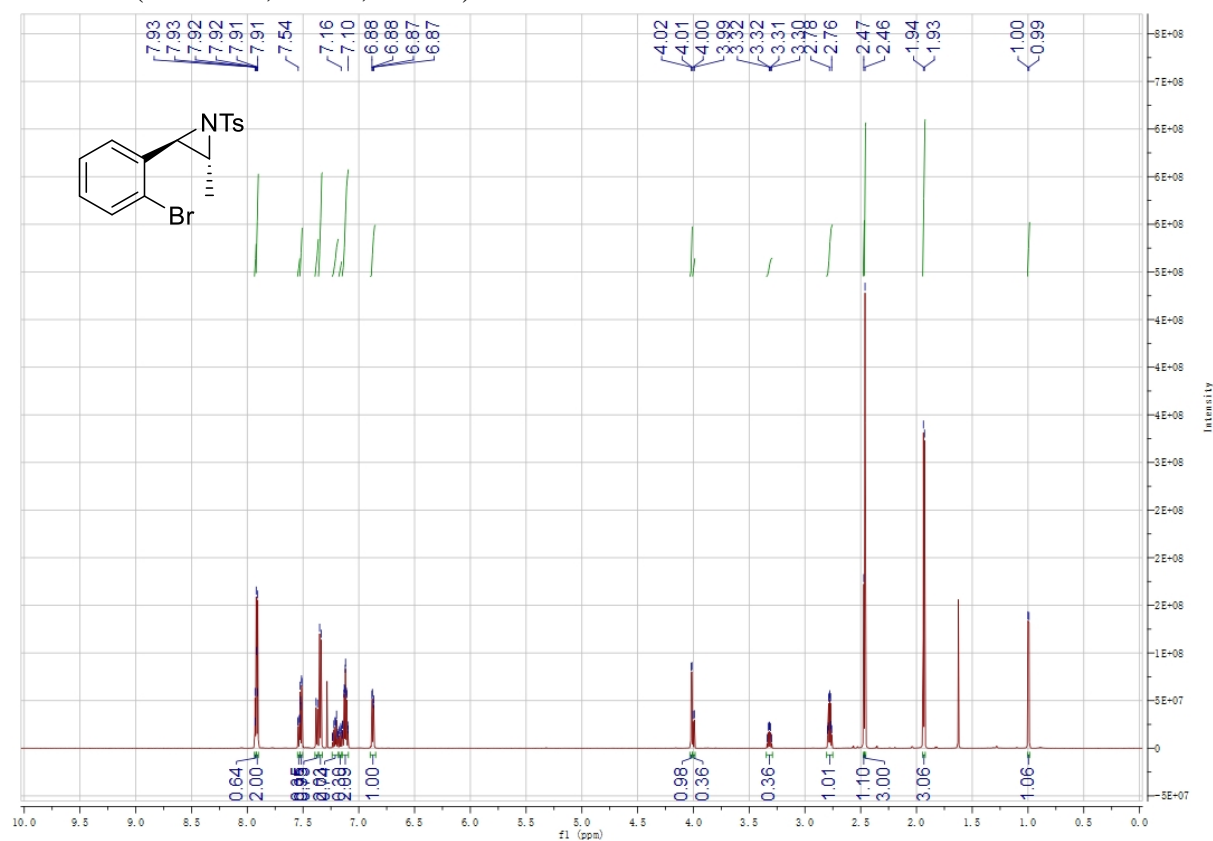



$^{13}\text{C}$  NMR (151 MHz, 293 K,  $\text{CDCl}_3$ )

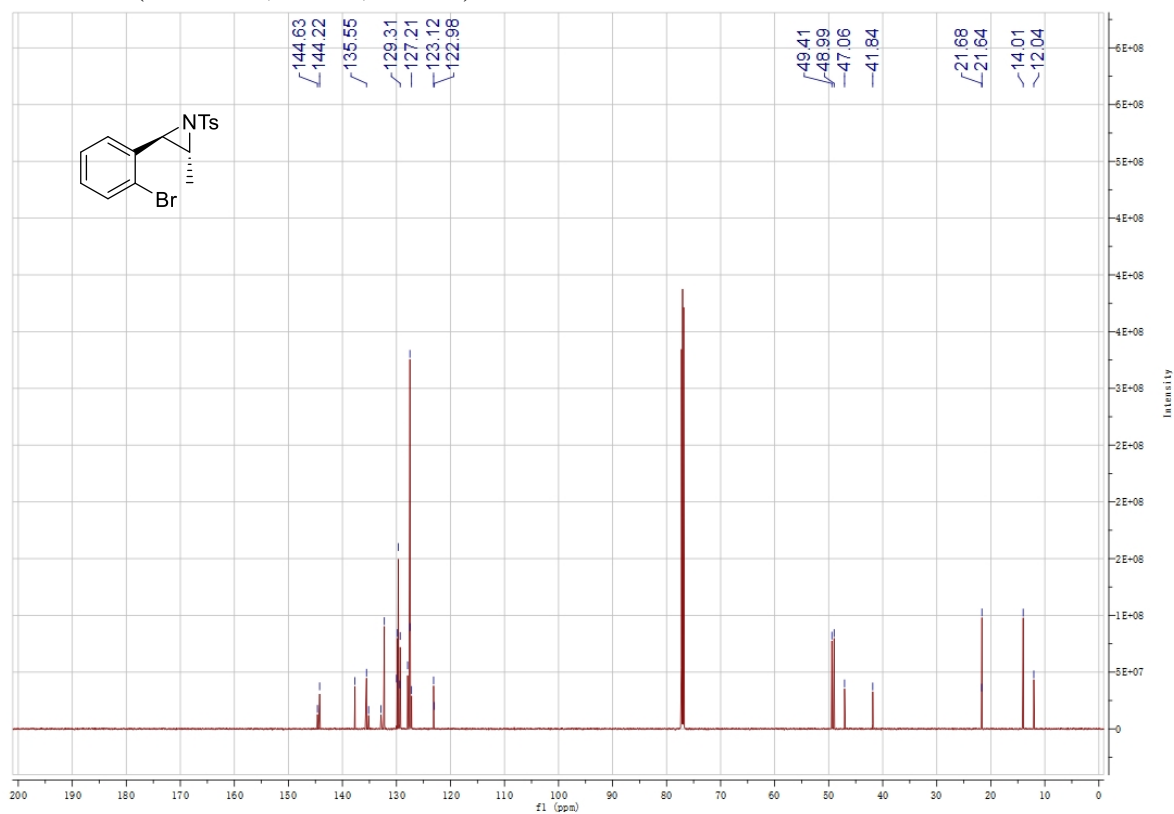

**Supplementary Figure 76.** *(2R,3R)*-2-Ethyl-3-phenyl-1-tosylaziridine (**20g**)

$^1\text{H}$  NMR (600 MHz, 293 K,  $\text{CDCl}_3$ )

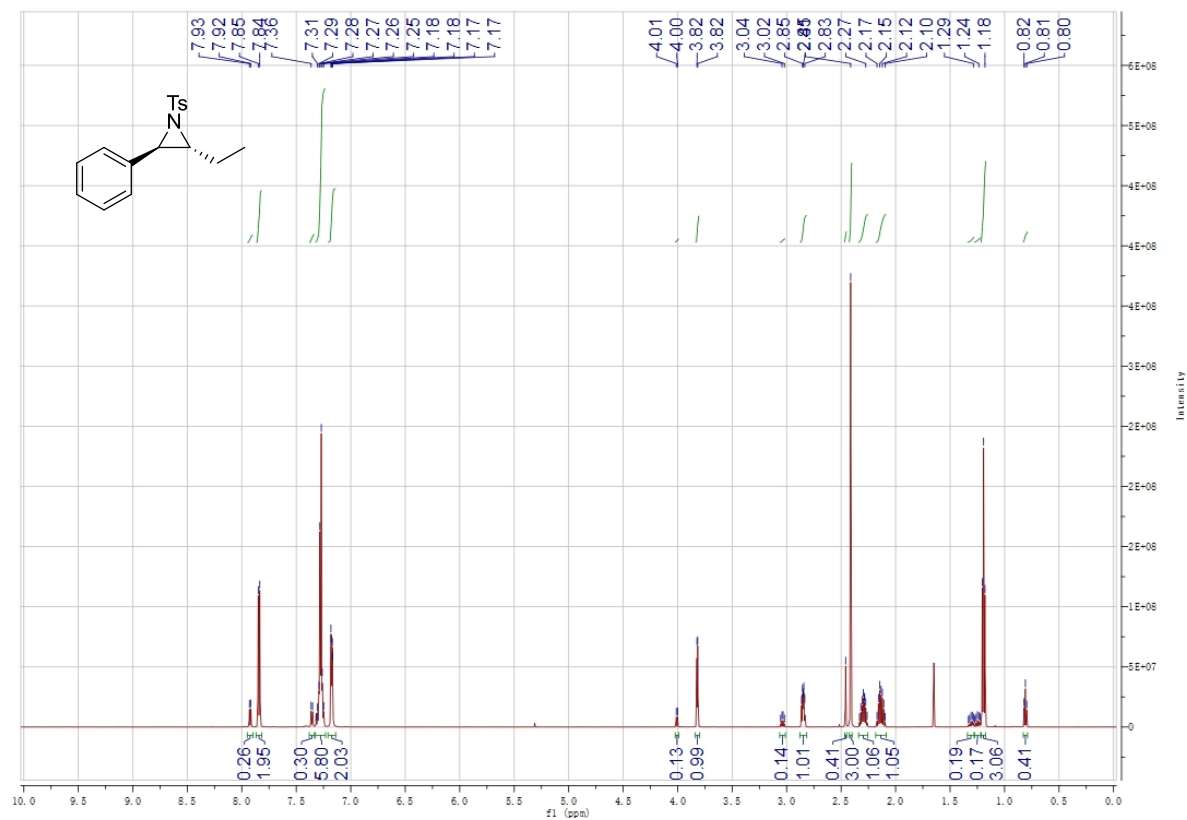

$^{13}\text{C}$  NMR (151 MHz, 293 K,  $\text{CDCl}_3$ )

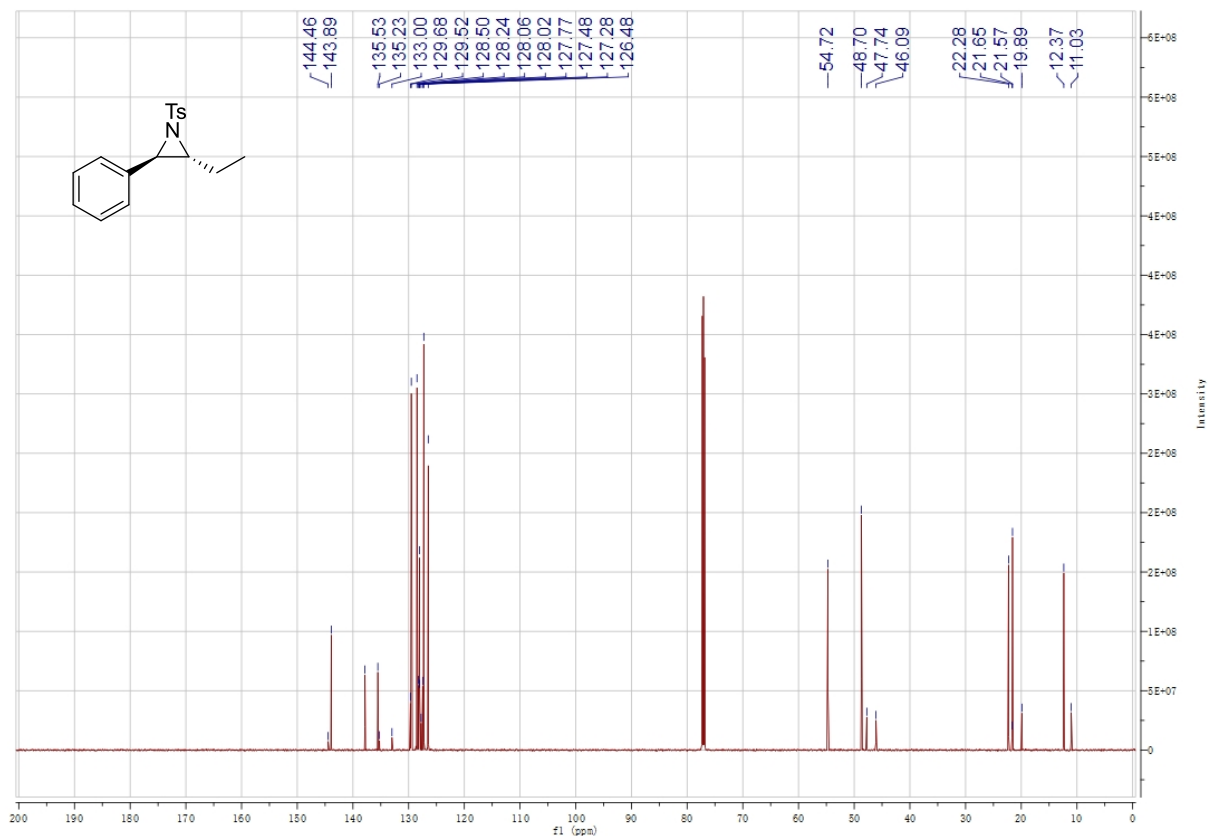

**Supplementary Figure 77.** (2*S*,3*S*)-2,3-Dibutyl-1-tosylaziridine (**20h**)

$^1\text{H}$  NMR (600 MHz, 293 K,  $\text{CDCl}_3$ )

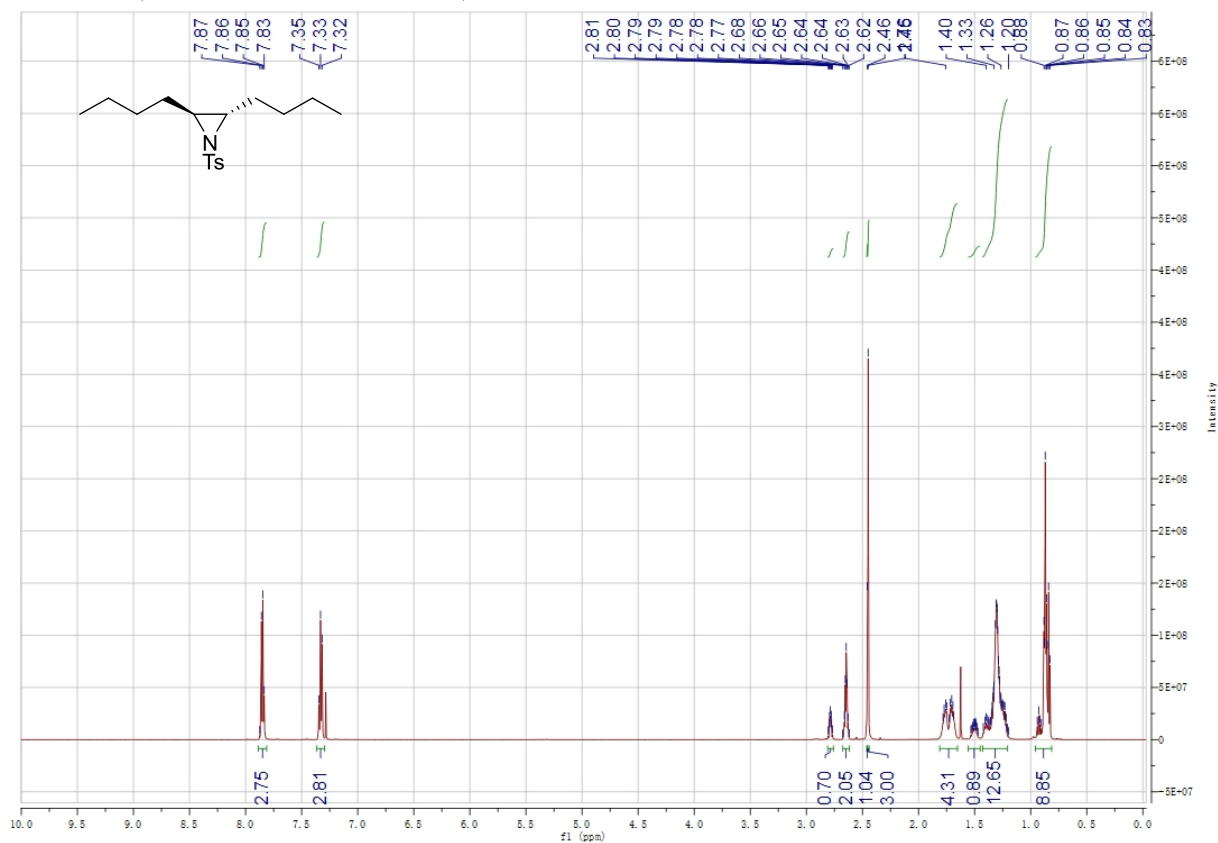

$^{13}\text{C}$  NMR (151 MHz, 293 K,  $\text{CDCl}_3$ )

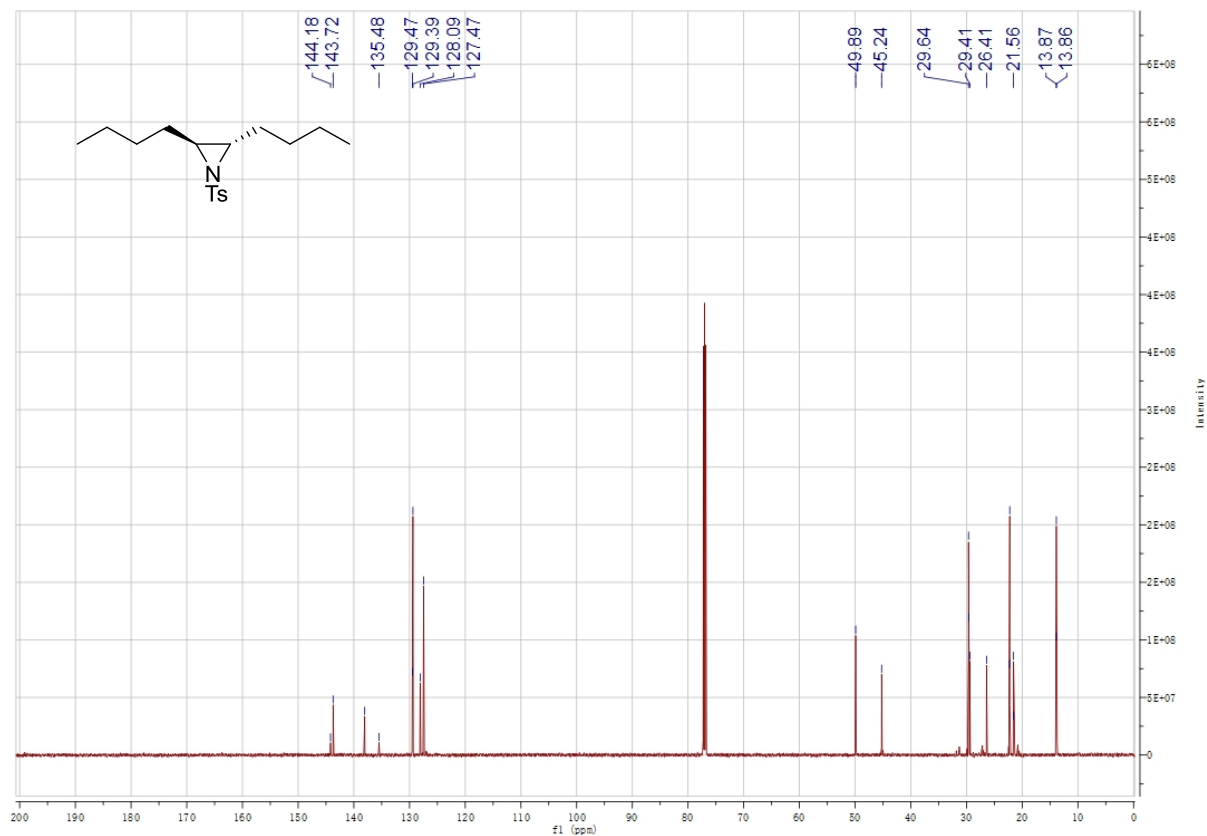

**Supplementary Figure 78.** (2*S*,3*S*)-2-Isopropyl-3-methyl-1-tosylaziridine (**20i**)

$^1\text{H}$  NMR (600 MHz, 293 K,  $\text{CDCl}_3$ )

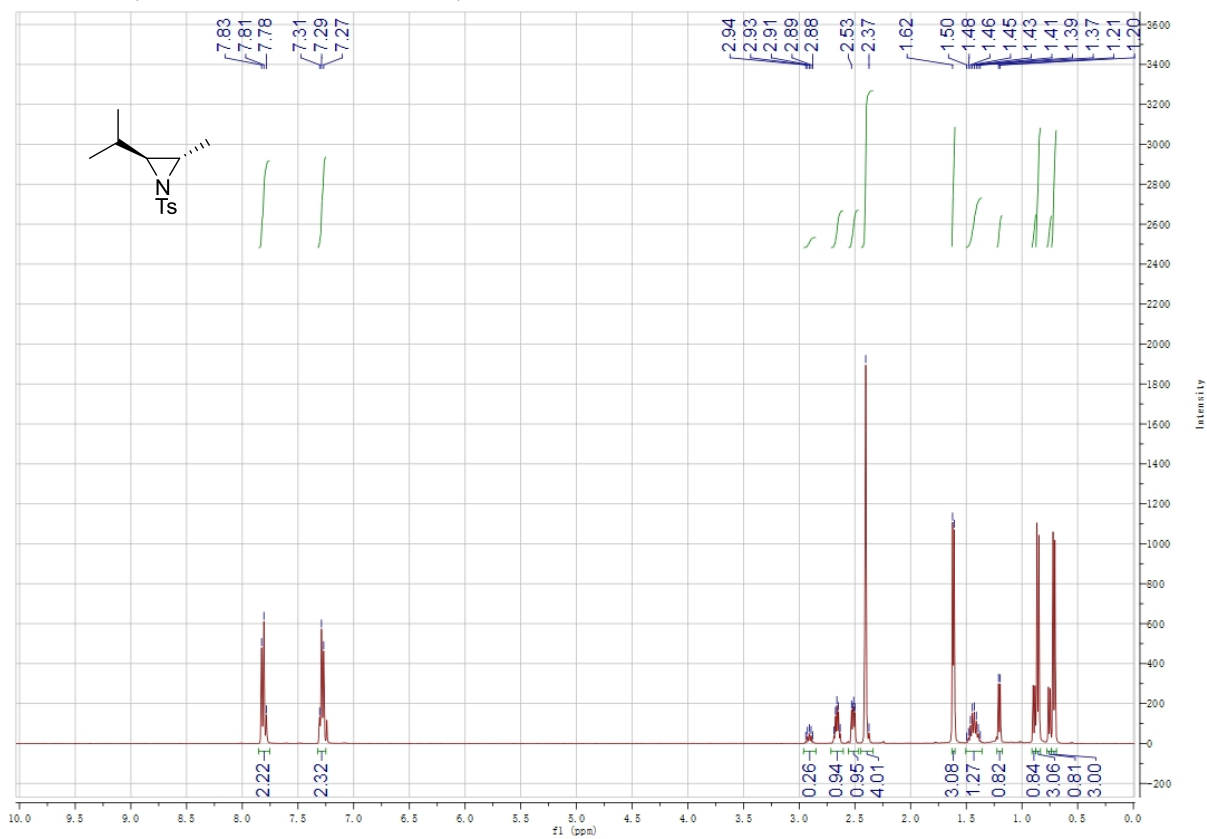

$^{13}\text{C}$  NMR (151 MHz, 293 K,  $\text{CDCl}_3$ )

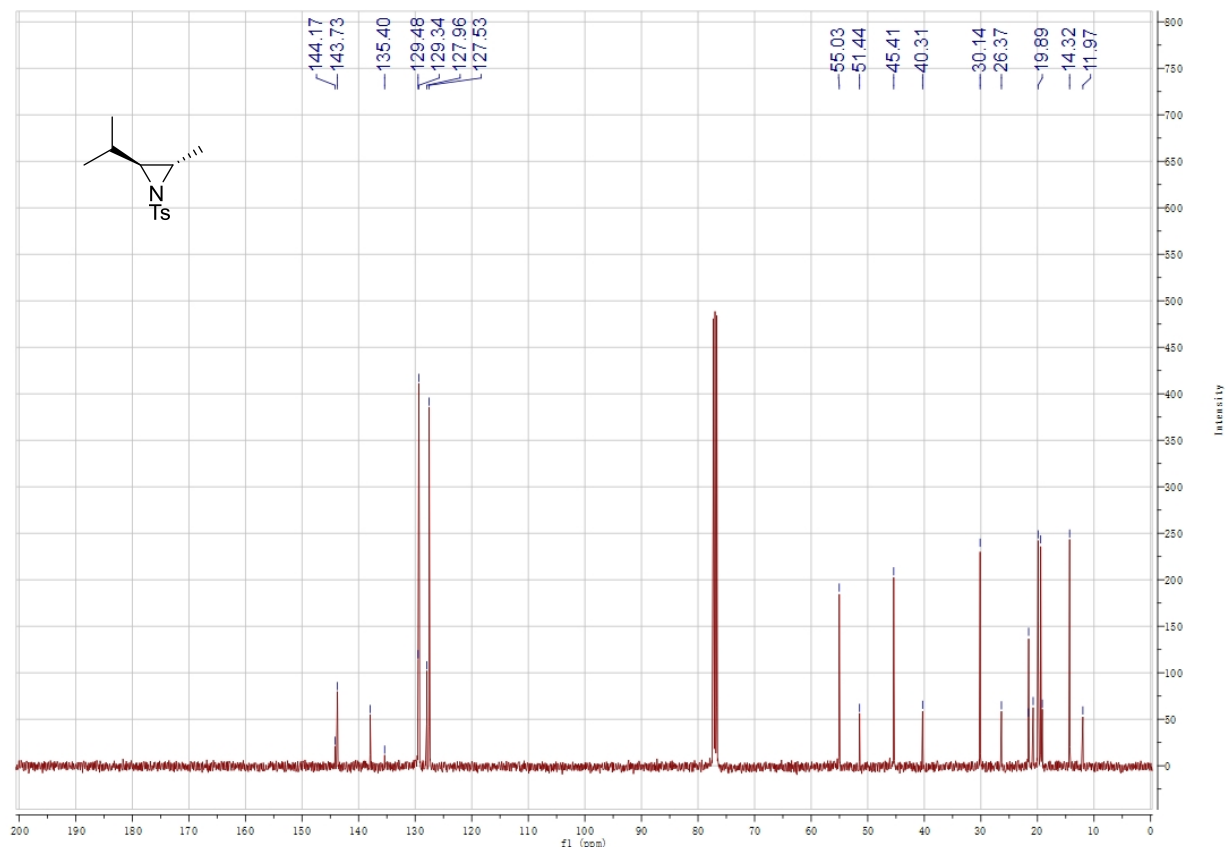

**Supplementary Figure 79.** 2-Phenyl-1-tosylaziridine (22a)

$^1\text{H}$  NMR (300 MHz, 293 K,  $\text{CDCl}_3$ )

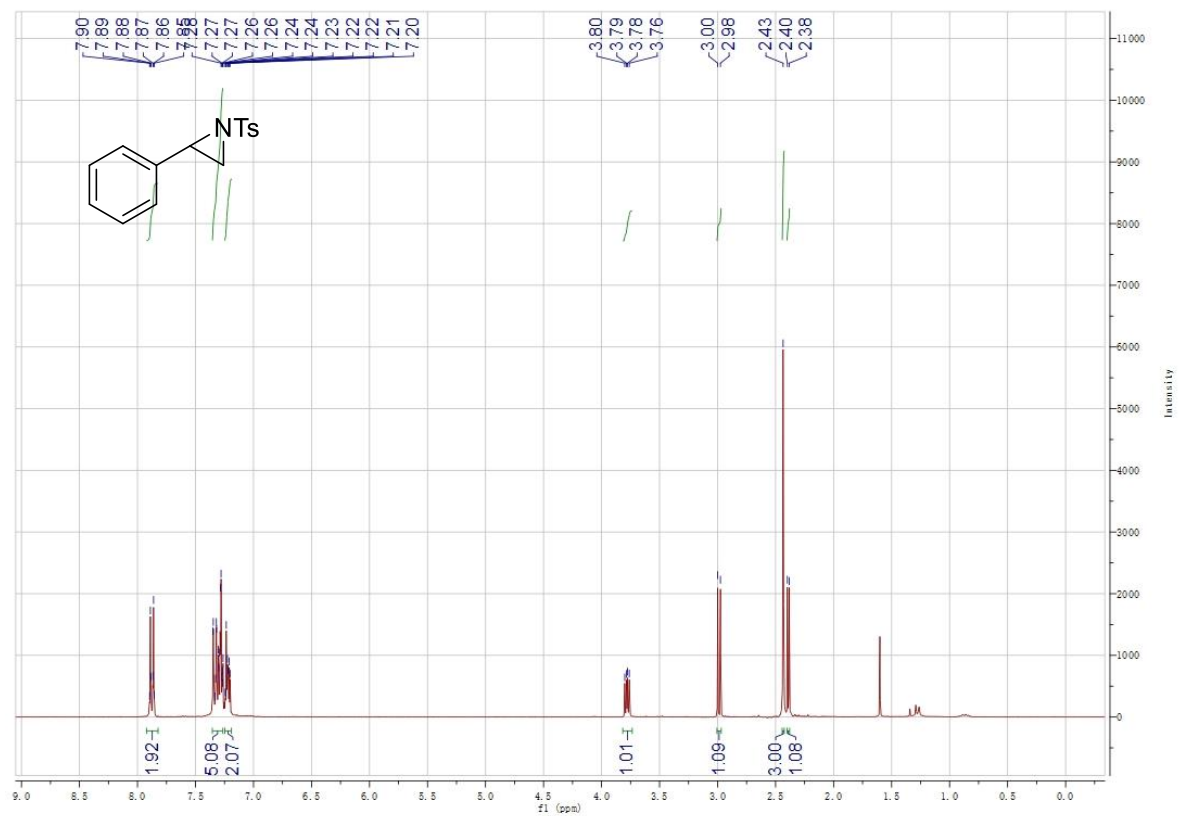

$^{13}\text{C}$  NMR (101 MHz, 293 K,  $\text{CDCl}_3$ )

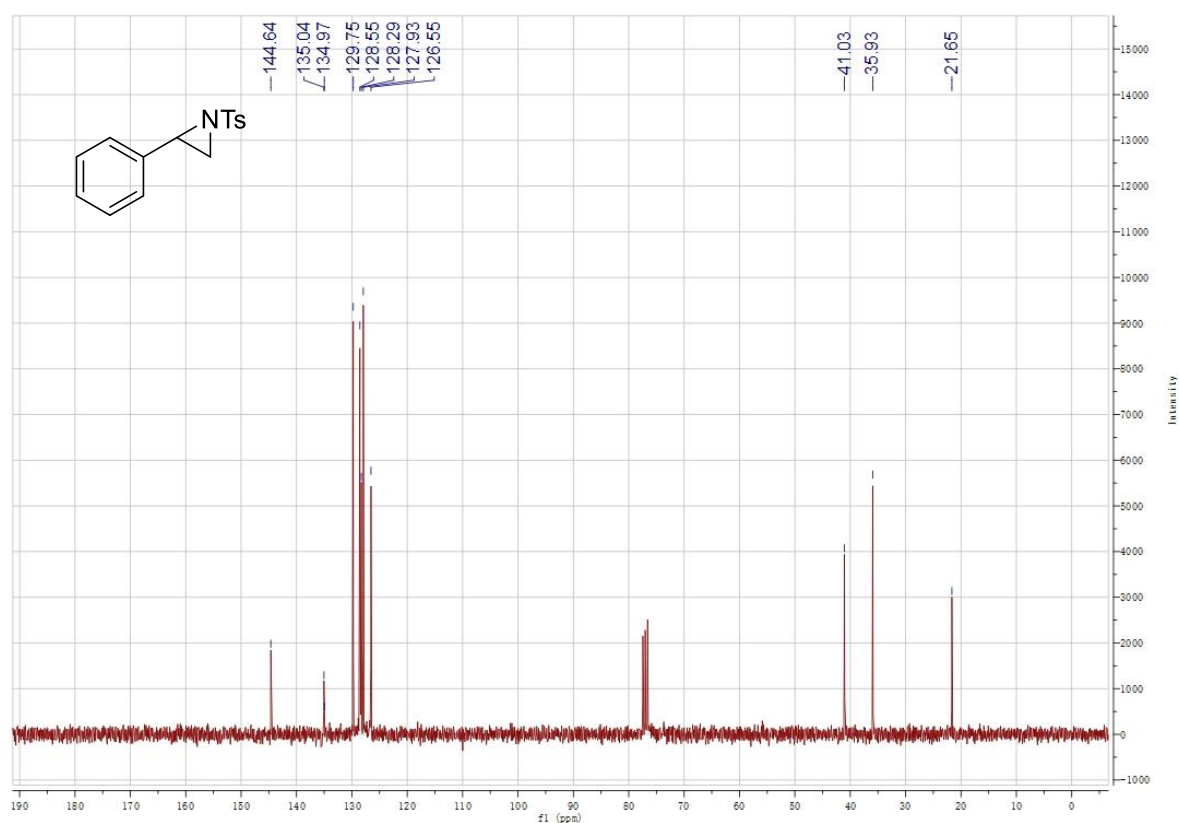

**Supplementary Figure 80.** *1-((4-Chlorophenyl)sulfonyl)-2-phenylaziridine (22b)*

$^1\text{H}$  NMR (400 MHz, 293 K,  $\text{CDCl}_3$ )

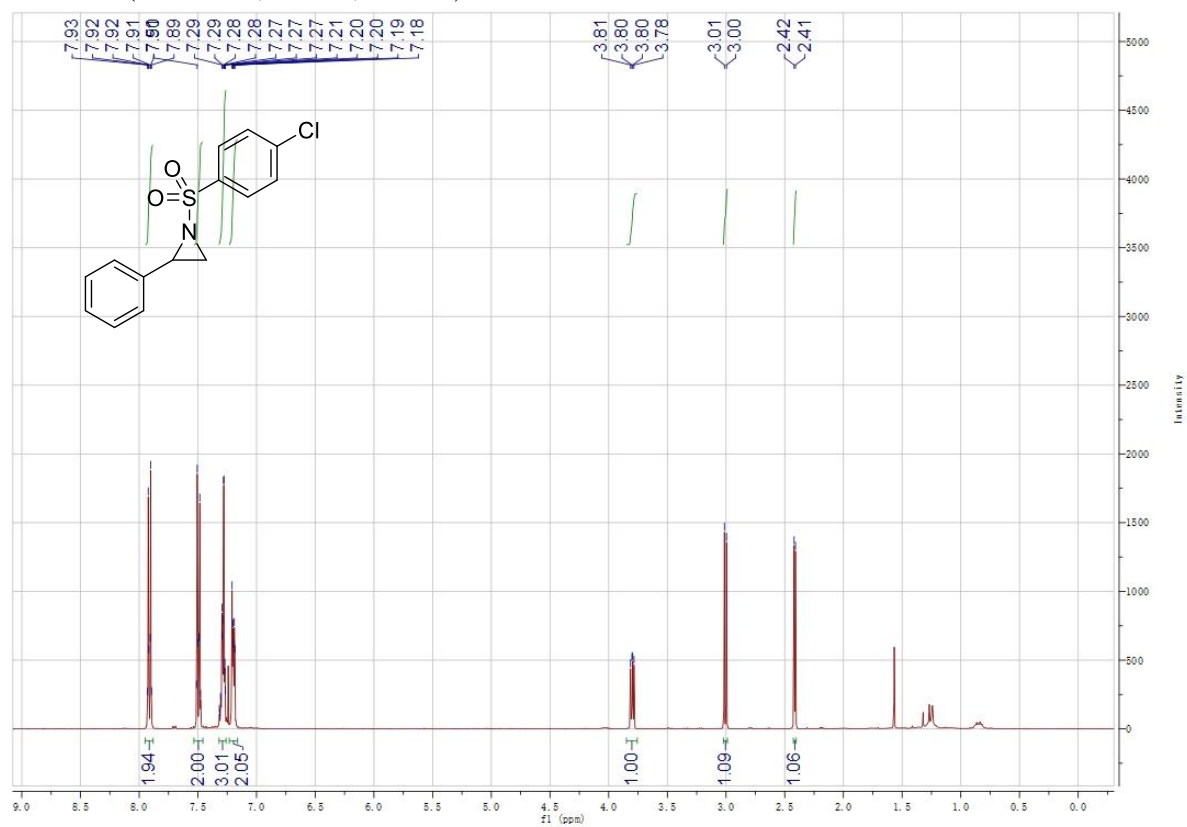

$^{13}\text{C}$  NMR (101 MHz, 293 K,  $\text{CDCl}_3$ )

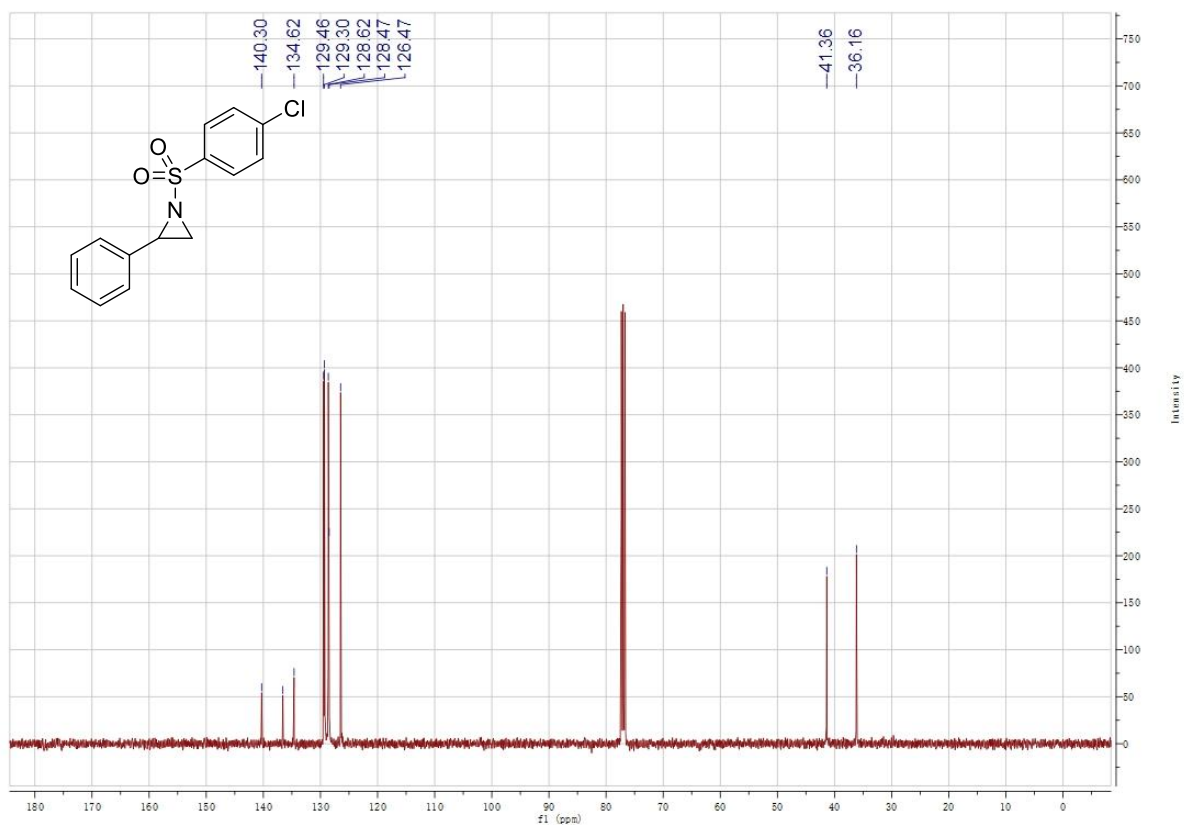

**Supplementary Figure 81.** 1-((3,5-Bis(Trifluoromethyl)phenyl)sulfonyl)-2-phenylaziridine (**22c**)

$^1\text{H}$  NMR (600 MHz, 293 K,  $\text{CDCl}_3$ )

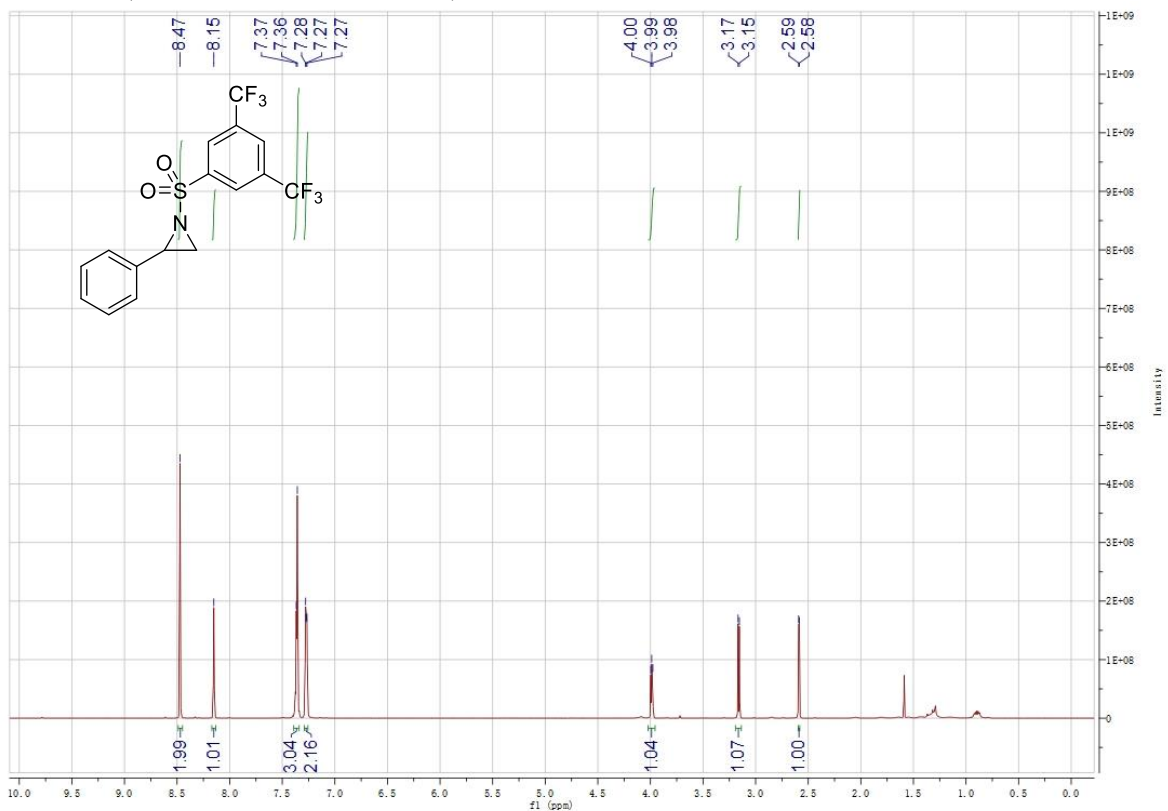

<sup>13</sup>C NMR (151 MHz, 293 K, CDCl<sub>3</sub>)

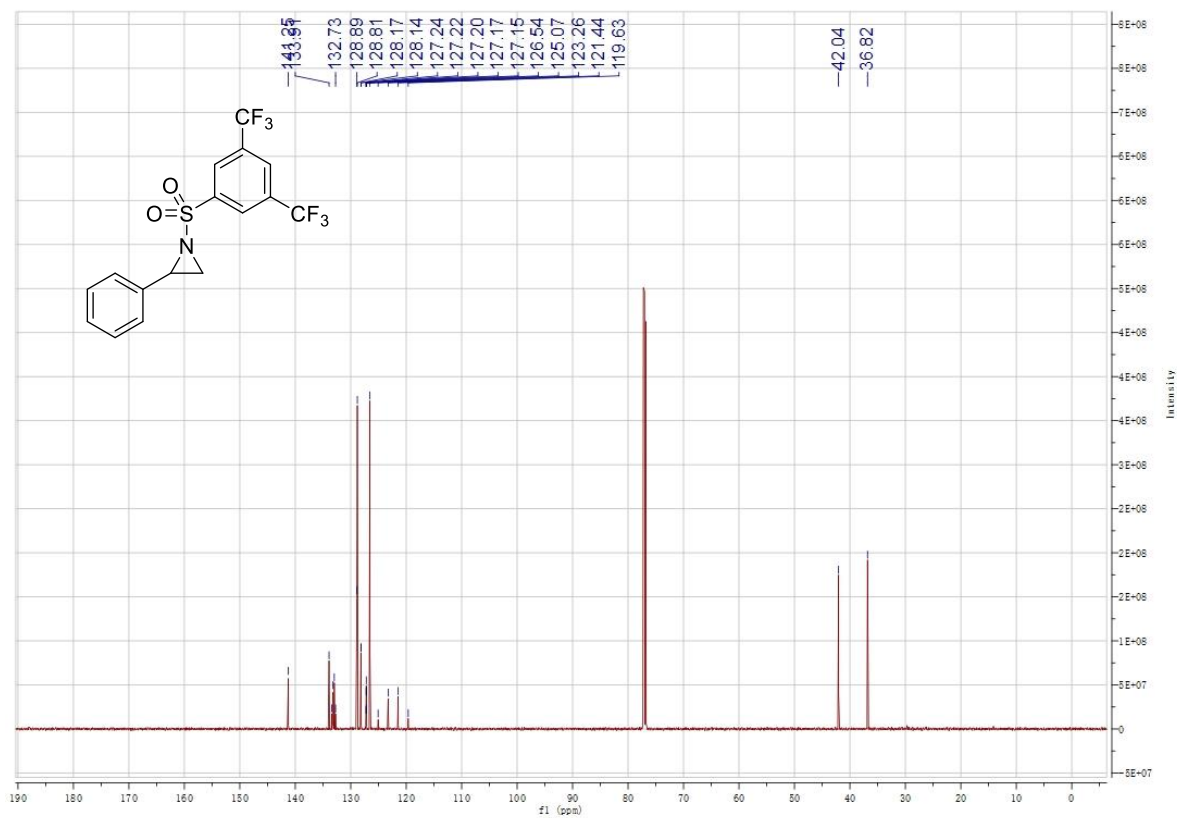

<sup>19</sup>F NMR (565 MHz, 293 K, CDCl<sub>3</sub>)

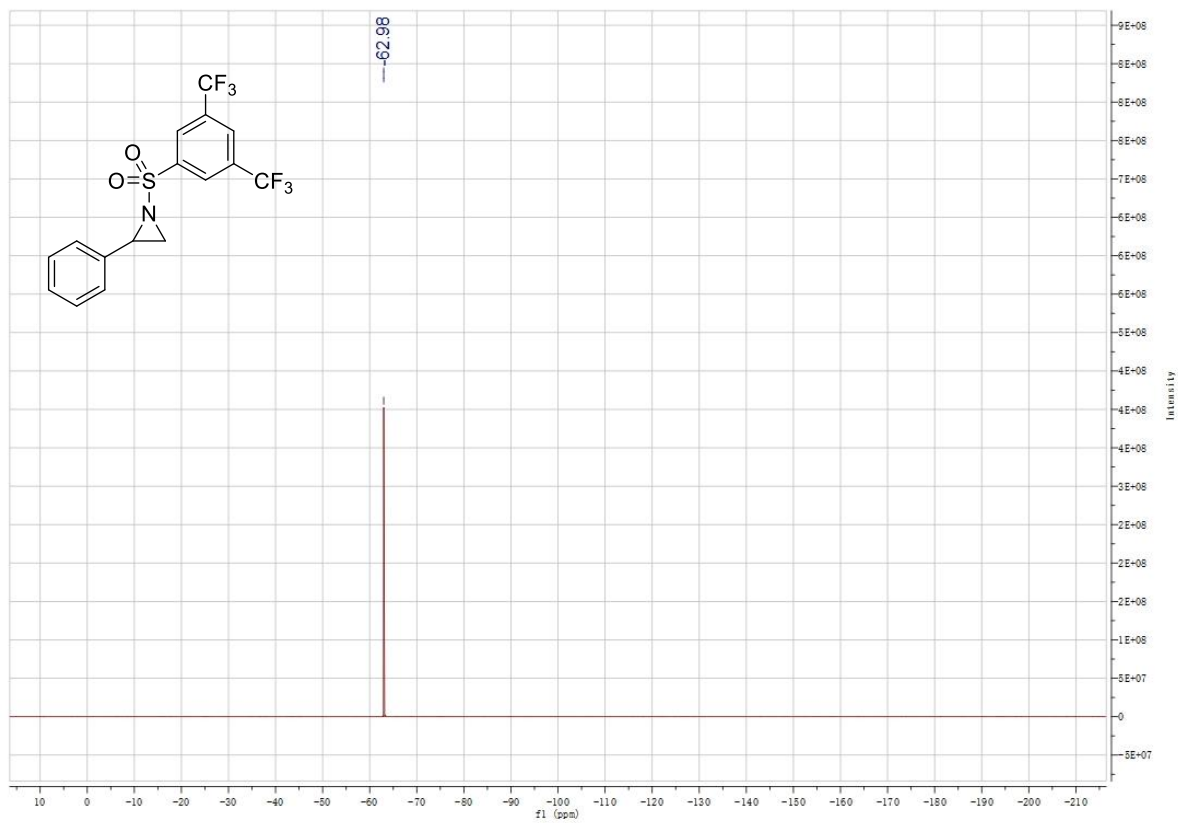

**Supplementary Figure 82.** *1-((3-Nitrophenyl)sulfonyl)-2-phenylaziridine (22d)*

<sup>1</sup>H NMR (600 MHz, 293 K, CDCl<sub>3</sub>)

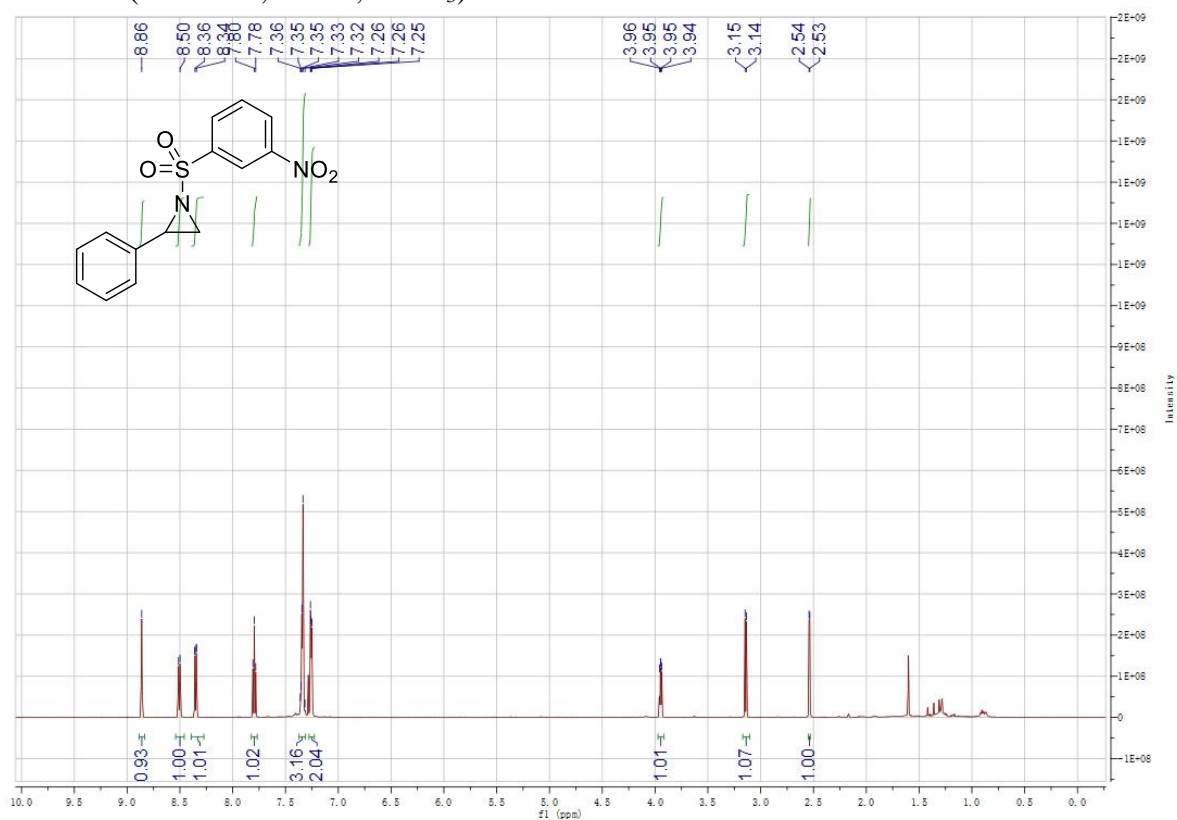

<sup>13</sup>C NMR (151 MHz, 293 K, CDCl<sub>3</sub>)

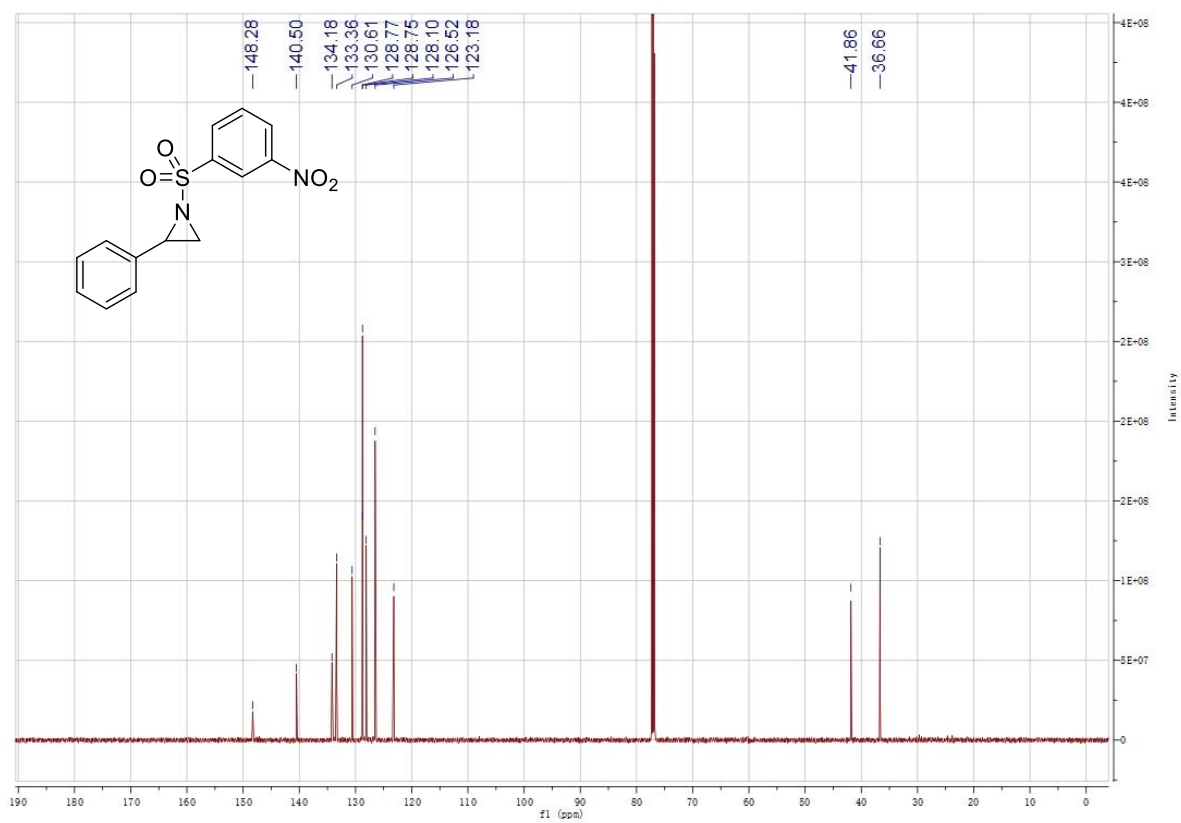



**Supplementary Figure 83.** *1-((2-Nitrophenyl)sulfonyl)-2-phenylaziridine (22e)*

$^1\text{H}$  NMR (600 MHz, 293 K,  $\text{CDCl}_3$ )

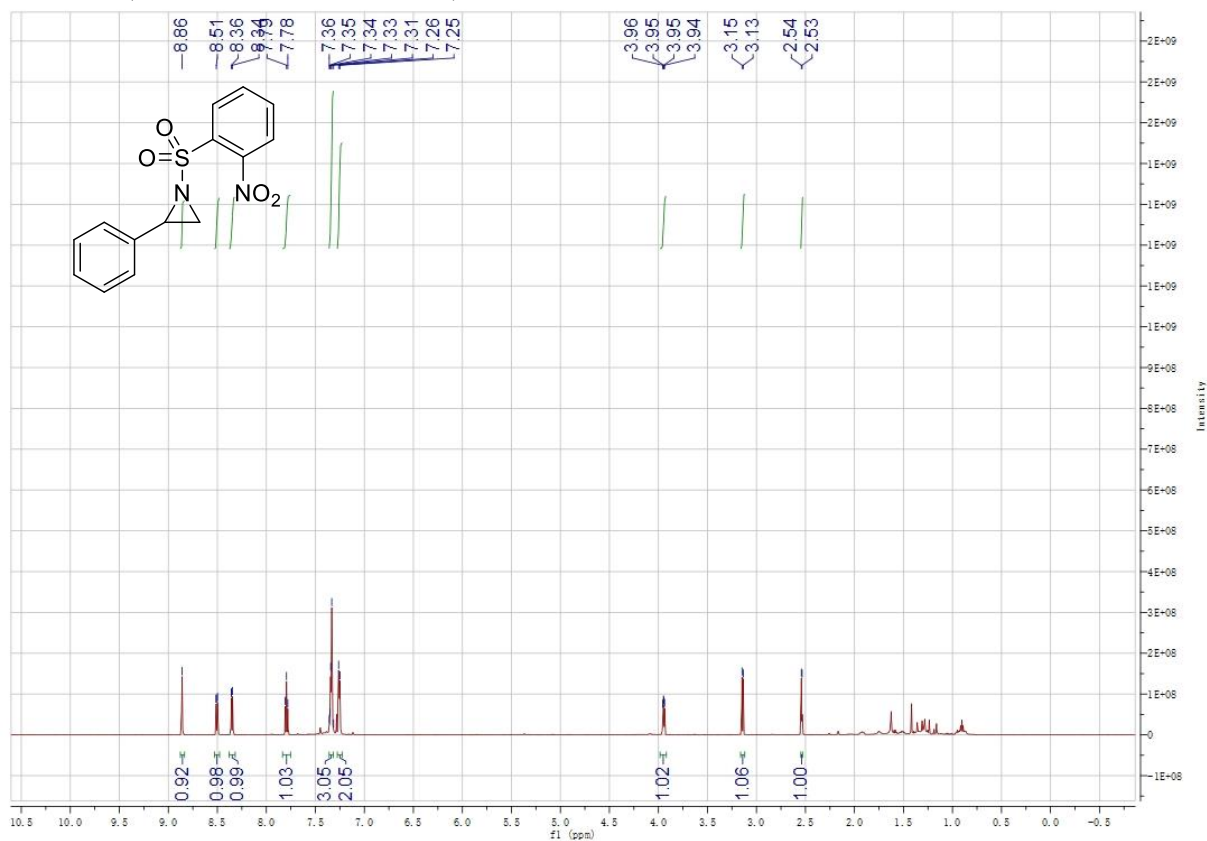

$^{13}\text{C}$  NMR (151 MHz, 293 K,  $\text{CDCl}_3$ )

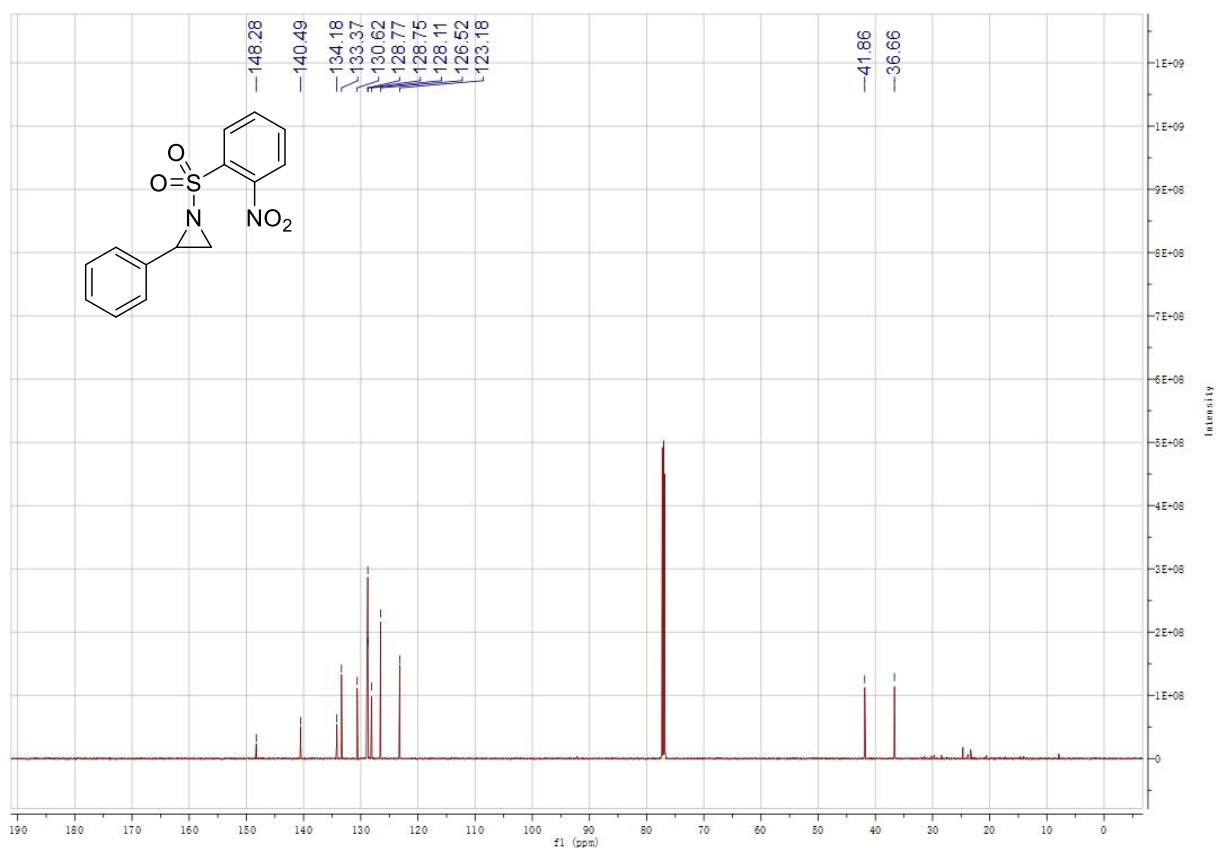

**Supplementary Figure 84. 2-Phenyl-1-(*o*-tolylsulfonyl)aziridine (22f)**

$^1\text{H}$  NMR (600 MHz, 293 K,  $\text{CDCl}_3$ )

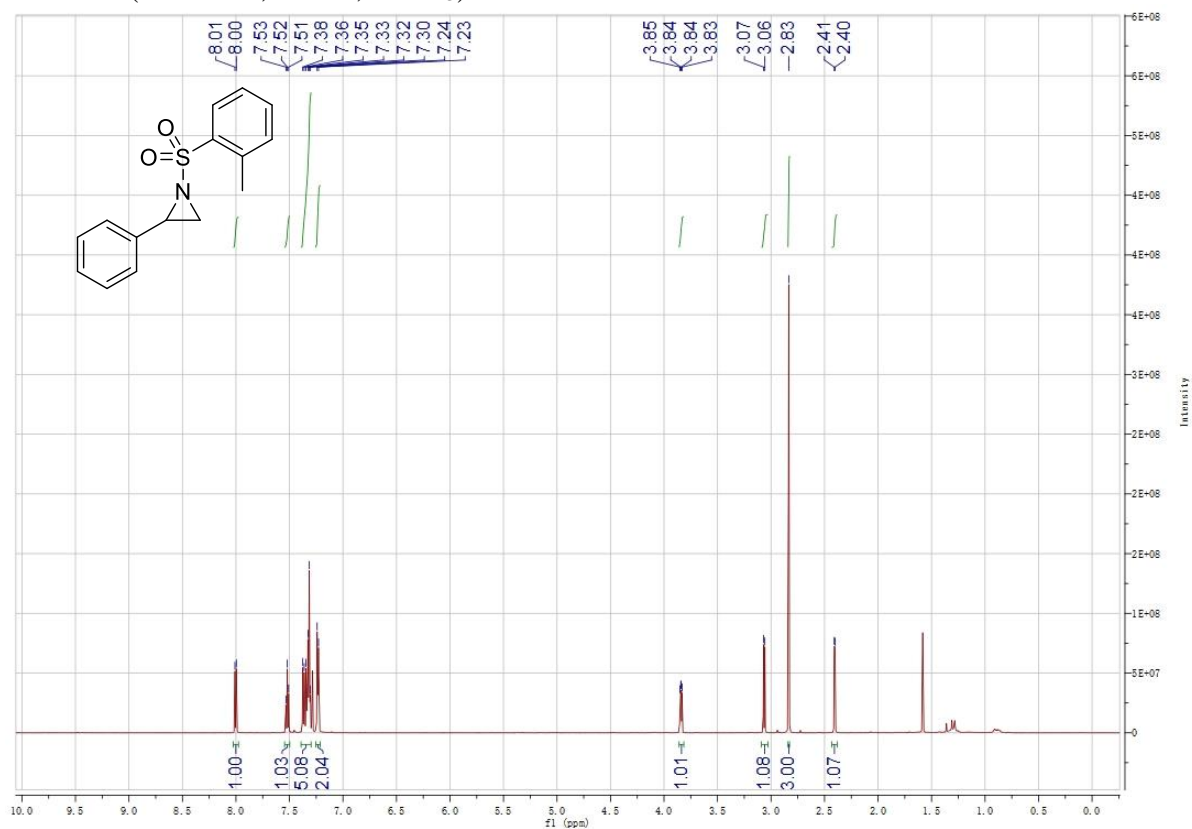

$^{13}\text{C}$  NMR (151 MHz, 293 K,  $\text{CDCl}_3$ )

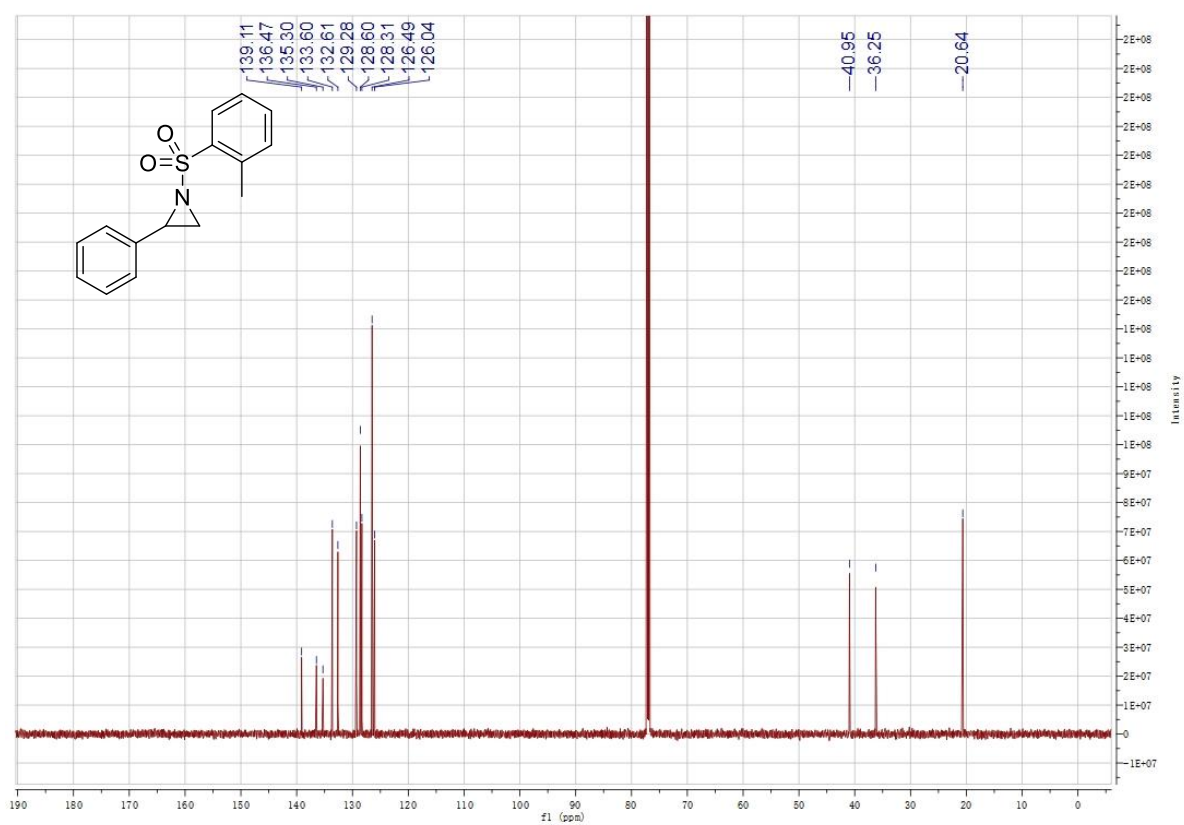

**Supplementary Figure 85.** 1-([1,1'-Biphenyl]-4-ylsulfonyl)-2-phenylaziridine (**22g**)  
 $^1\text{H}$  NMR (600 MHz, 293 K,  $\text{CDCl}_3$ )

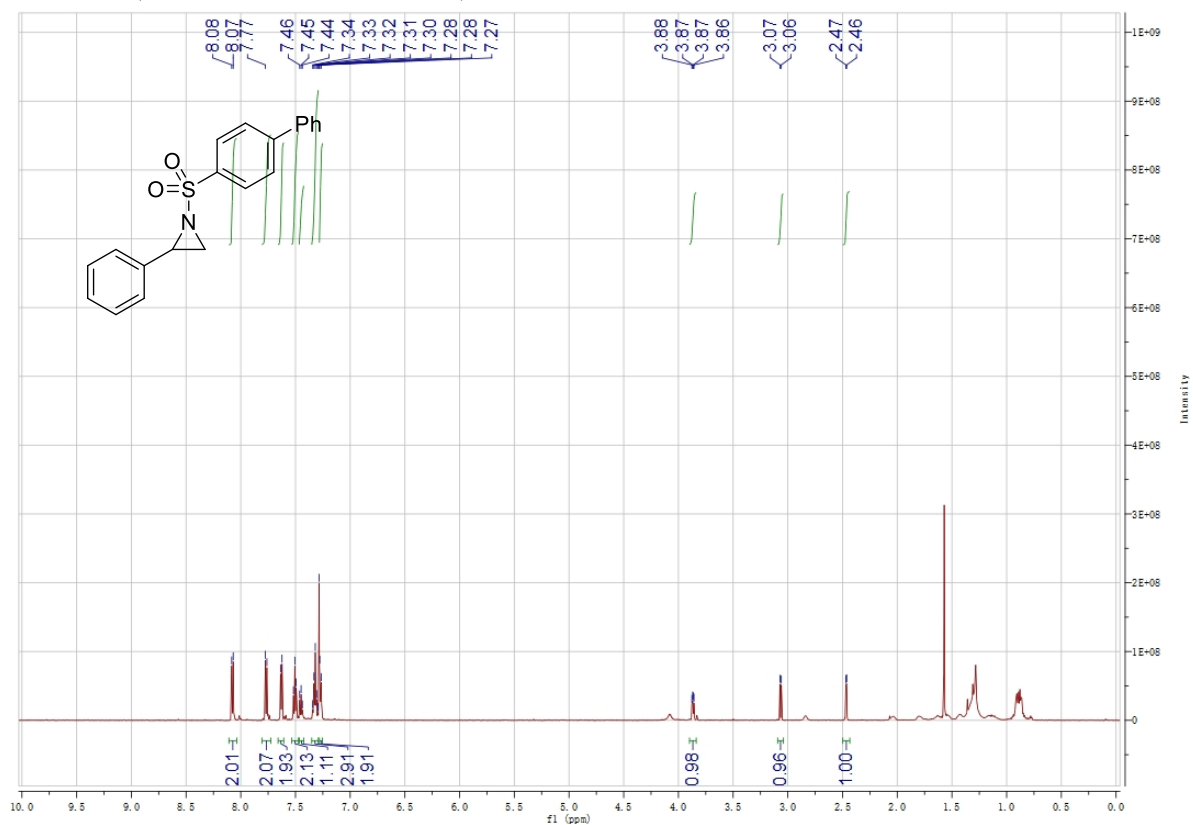

$^{13}\text{C}$  NMR (151 MHz, 293 K,  $\text{CDCl}_3$ )

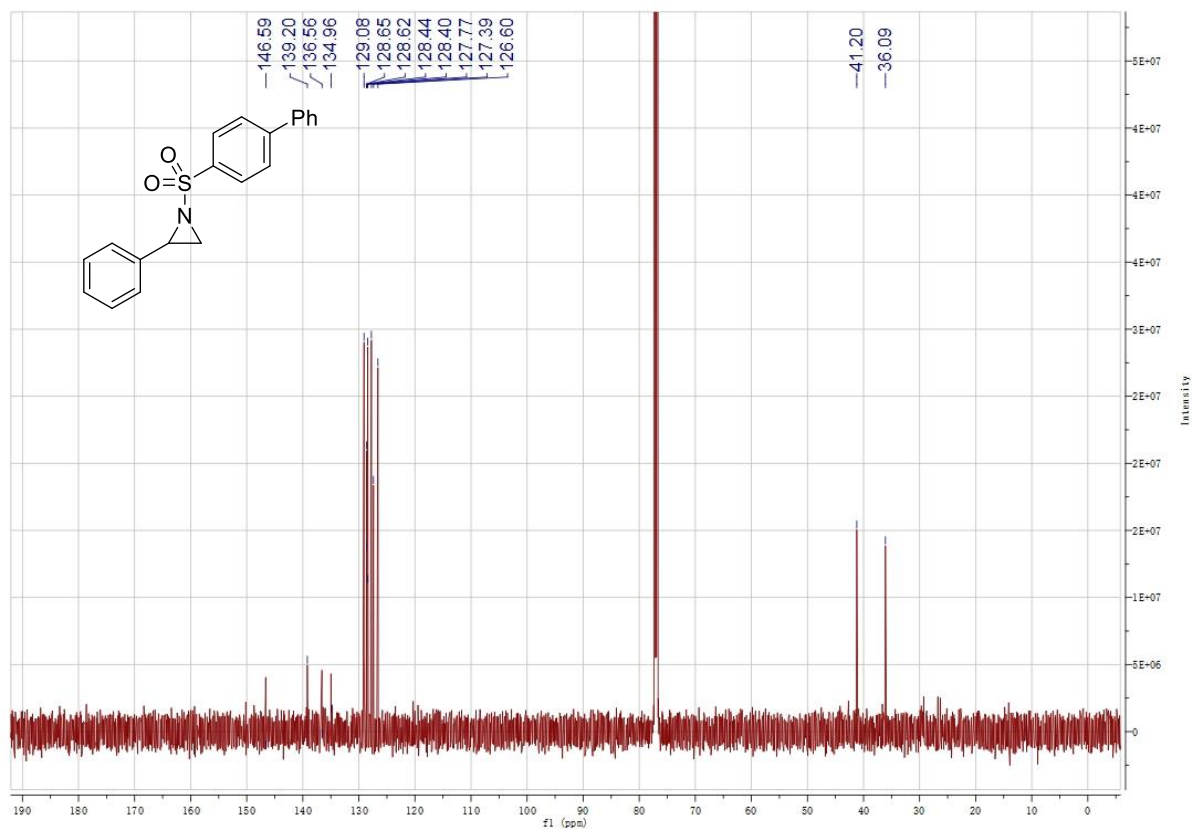

**Supplementary Figure 86. 1-(Naphthalen-2-ylsulfonyl)-2-phenylaziridine (22h)**

<sup>1</sup>H NMR (600 MHz, 293 K, CDCl<sub>3</sub>)

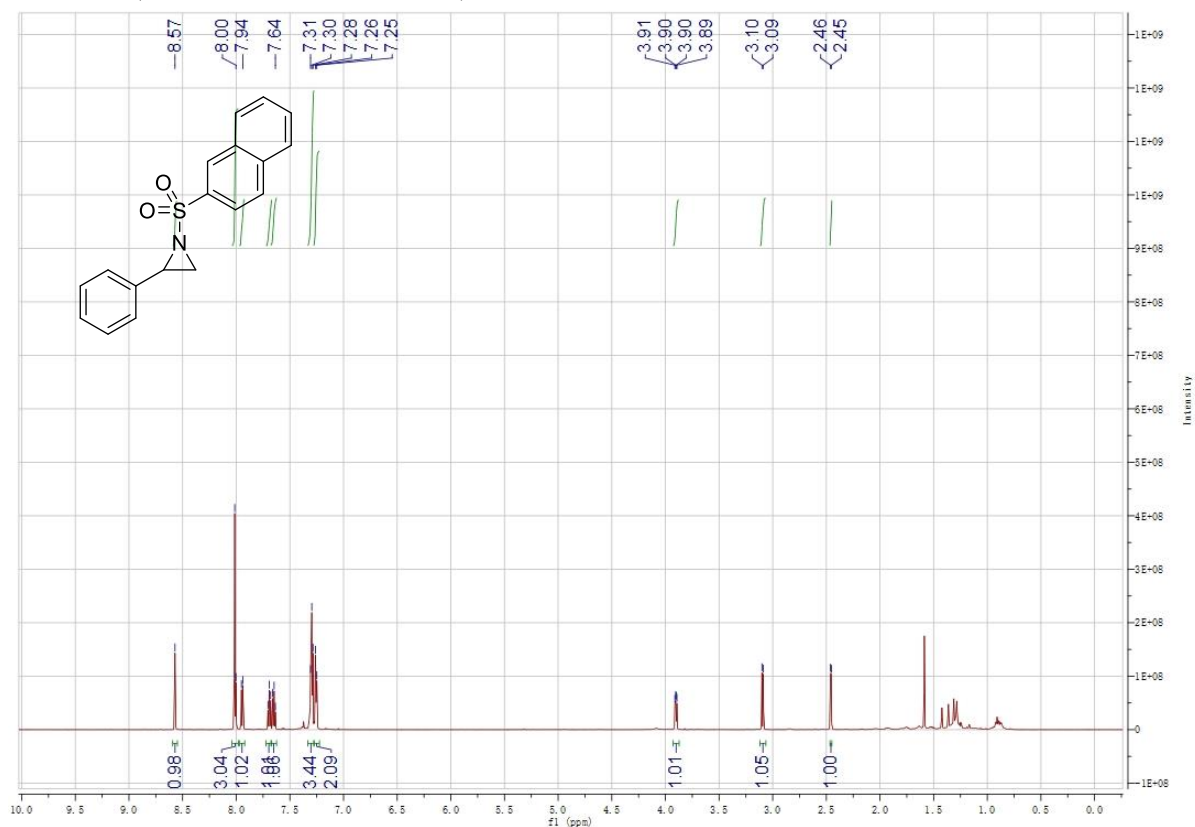

<sup>13</sup>C NMR (151 MHz, 293 K, CDCl<sub>3</sub>)

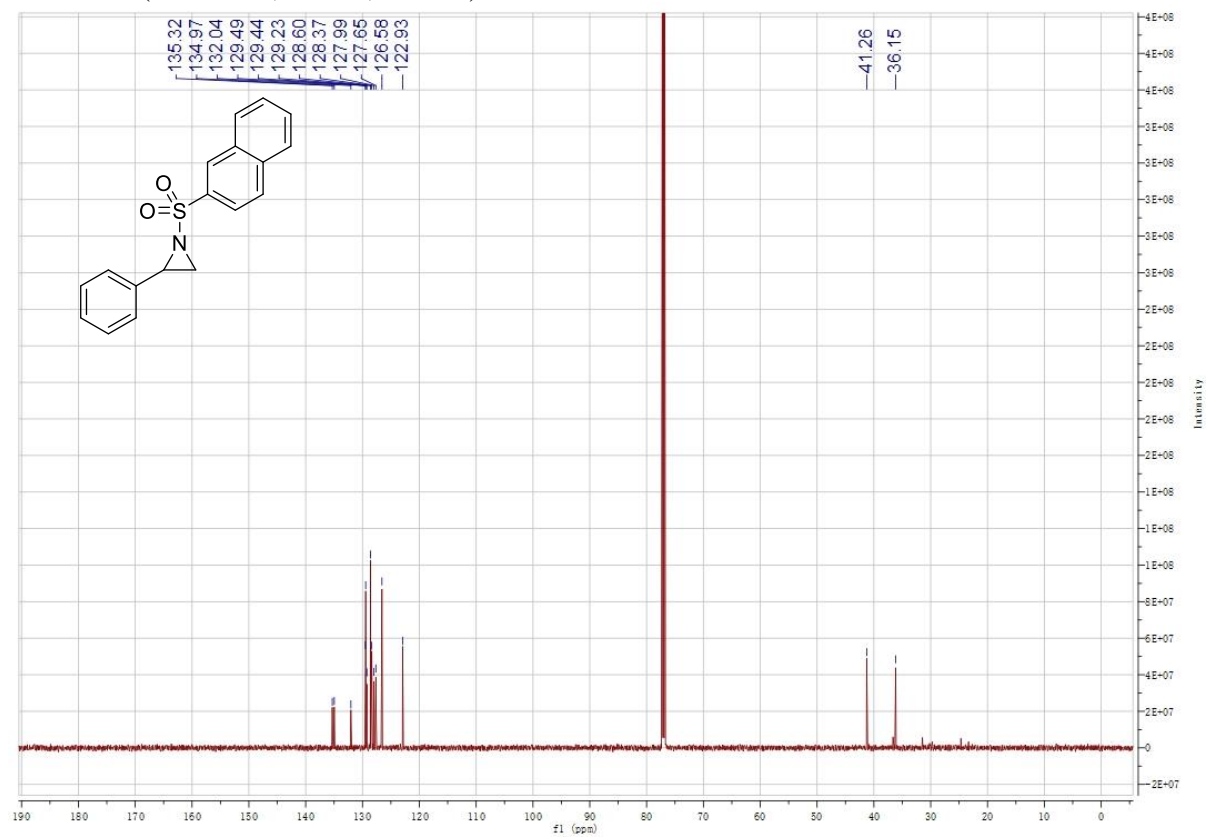

**Supplementary Figure 87. 2-(*p*-Tolyl)-1-tosylaziridine (**22i**)**

<sup>1</sup>H NMR (400 MHz, 293 K, CDCl<sub>3</sub>)

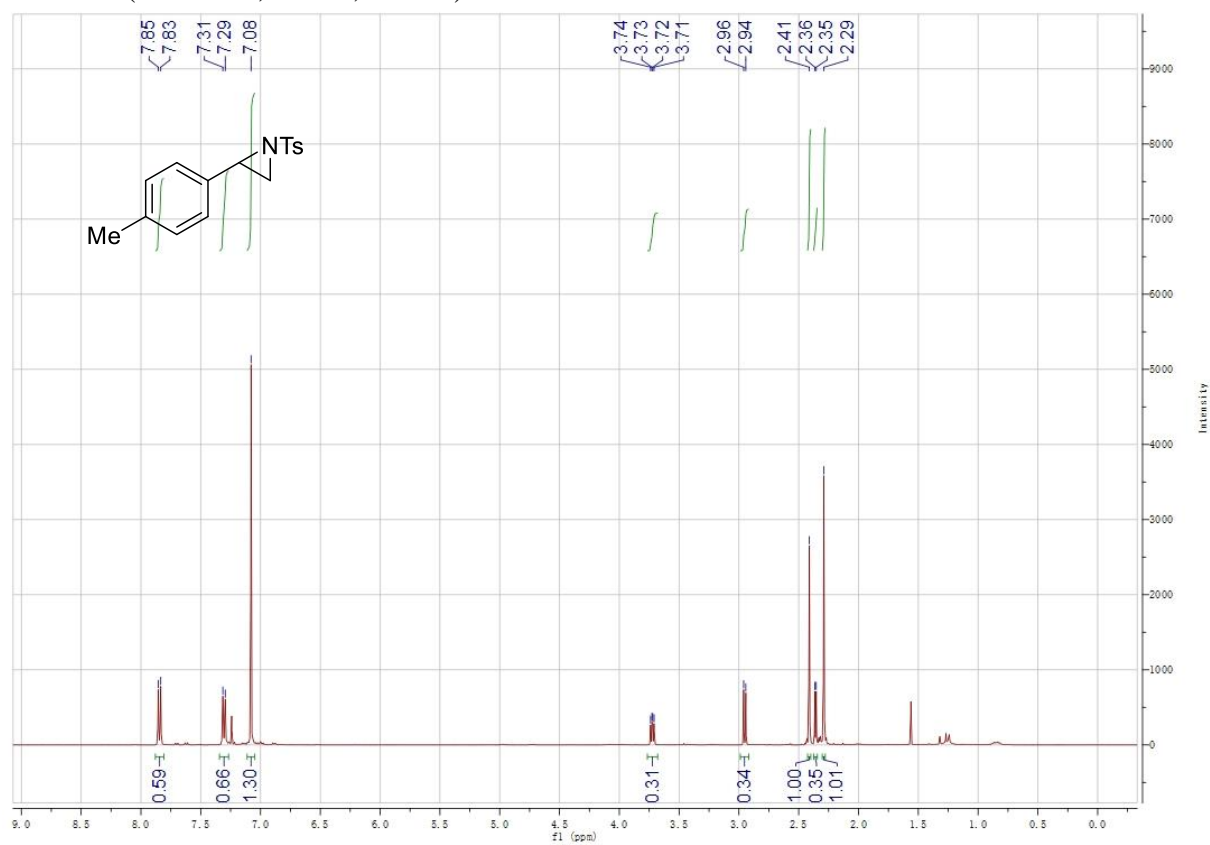

<sup>13</sup>C NMR (101 MHz, 293 K, CDCl<sub>3</sub>)

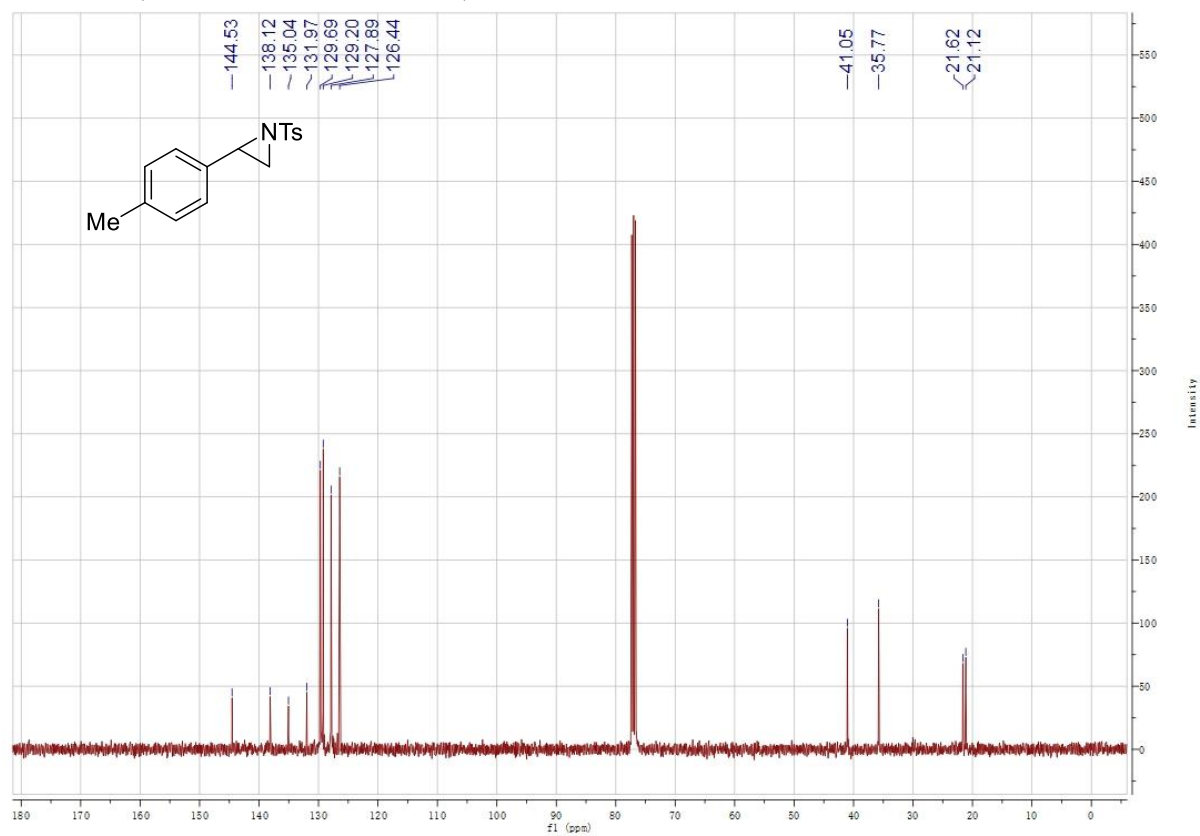

**Supplementary Figure 88.** *1-(4-(tert-Butyl)phenyl)-1-tosylaziridine (22j)*

$^1\text{H}$  NMR (400 MHz, 293 K,  $\text{CDCl}_3$ )

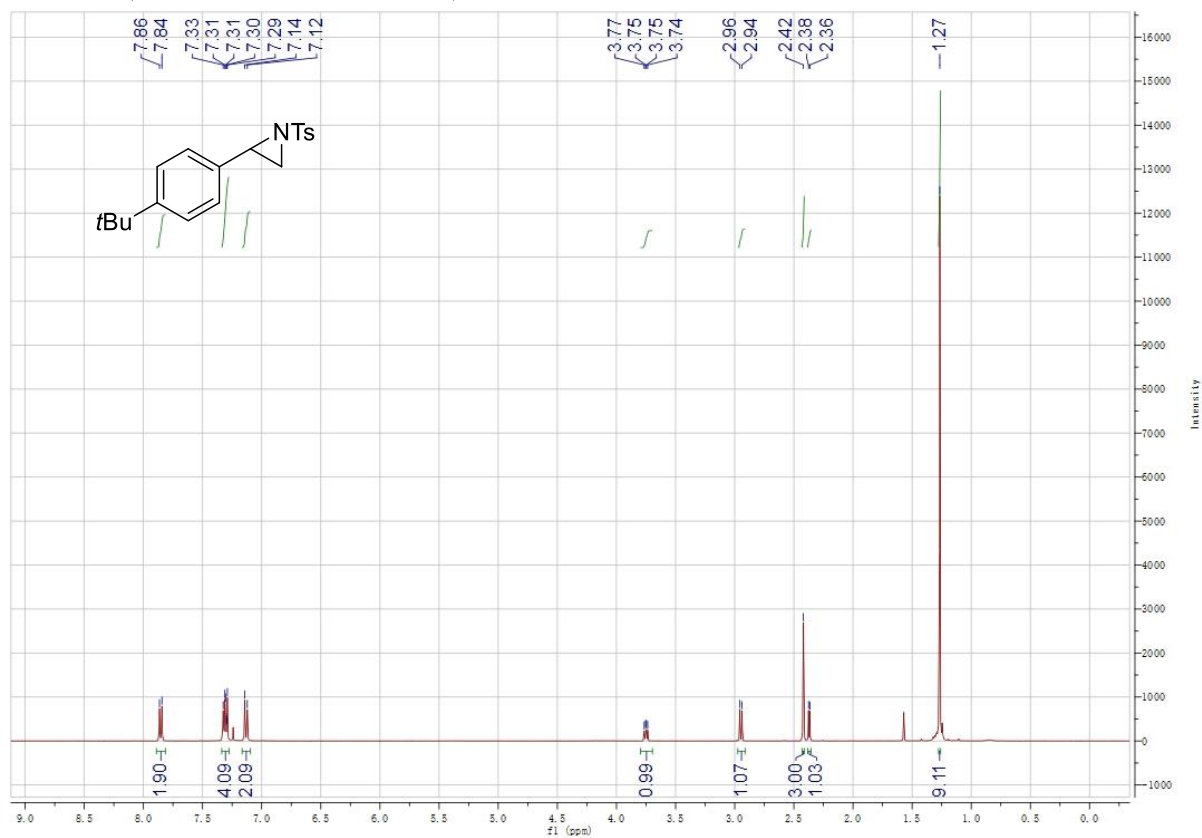

$^{13}\text{C}$  NMR (101 MHz, 293 K,  $\text{CDCl}_3$ )

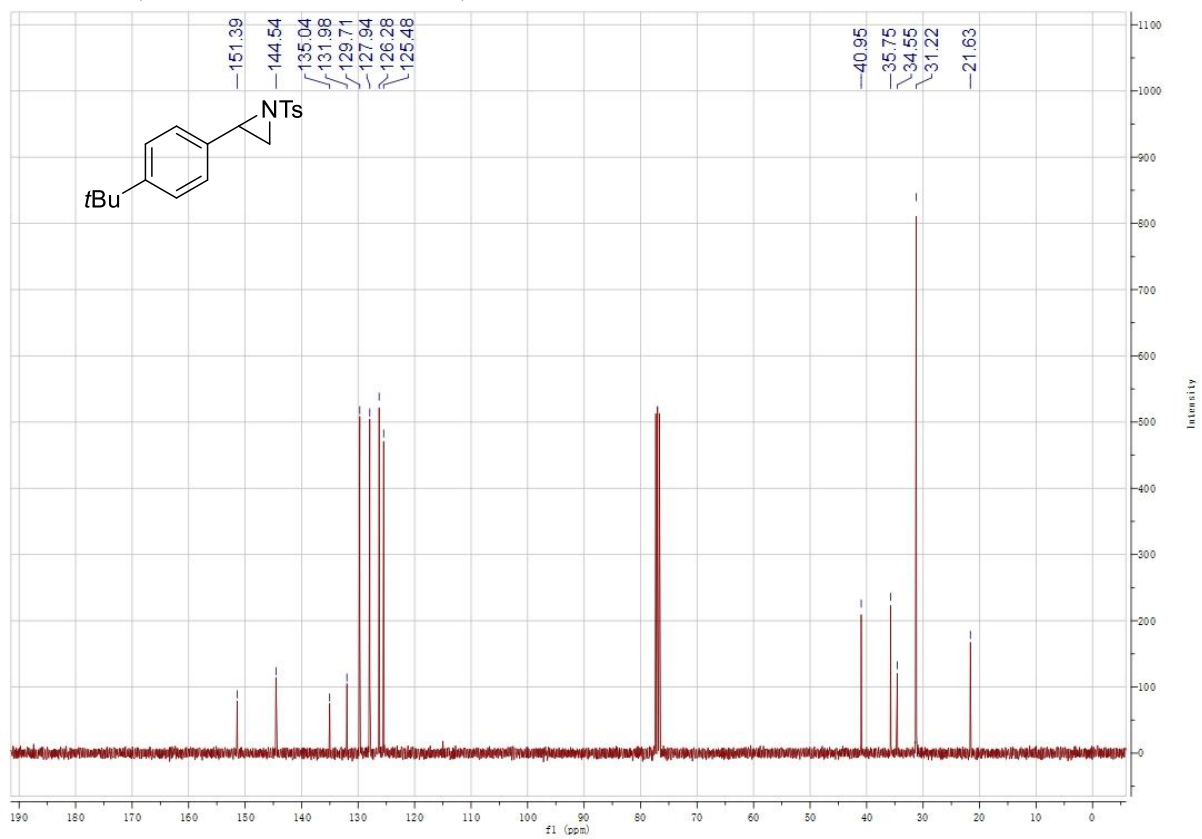

**Supplementary Figure 89.** *1-Tosyl-2-(4-(trifluoromethyl)phenyl)aziridine (22k)*

$^1\text{H}$  NMR (600 MHz, 293 K,  $\text{CDCl}_3$ )

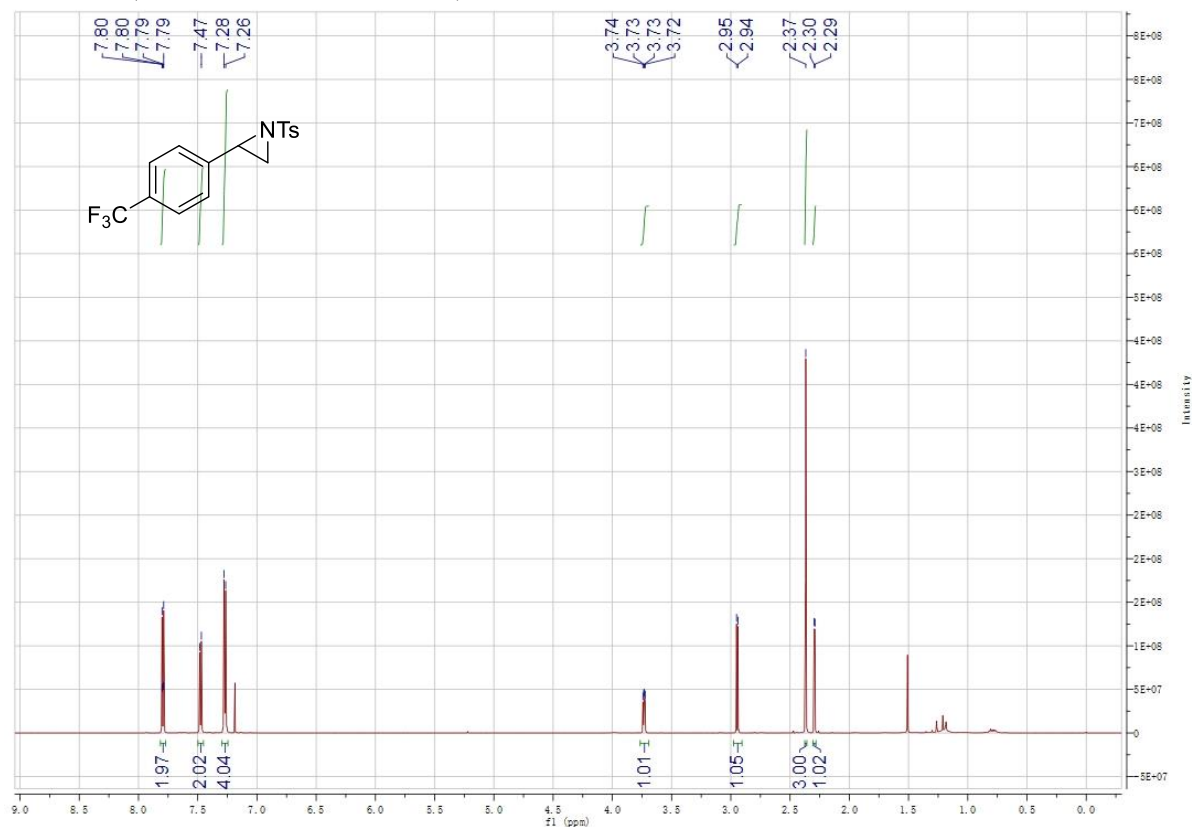

$^{13}\text{C}$  NMR (151 MHz, 293 K,  $\text{CDCl}_3$ )

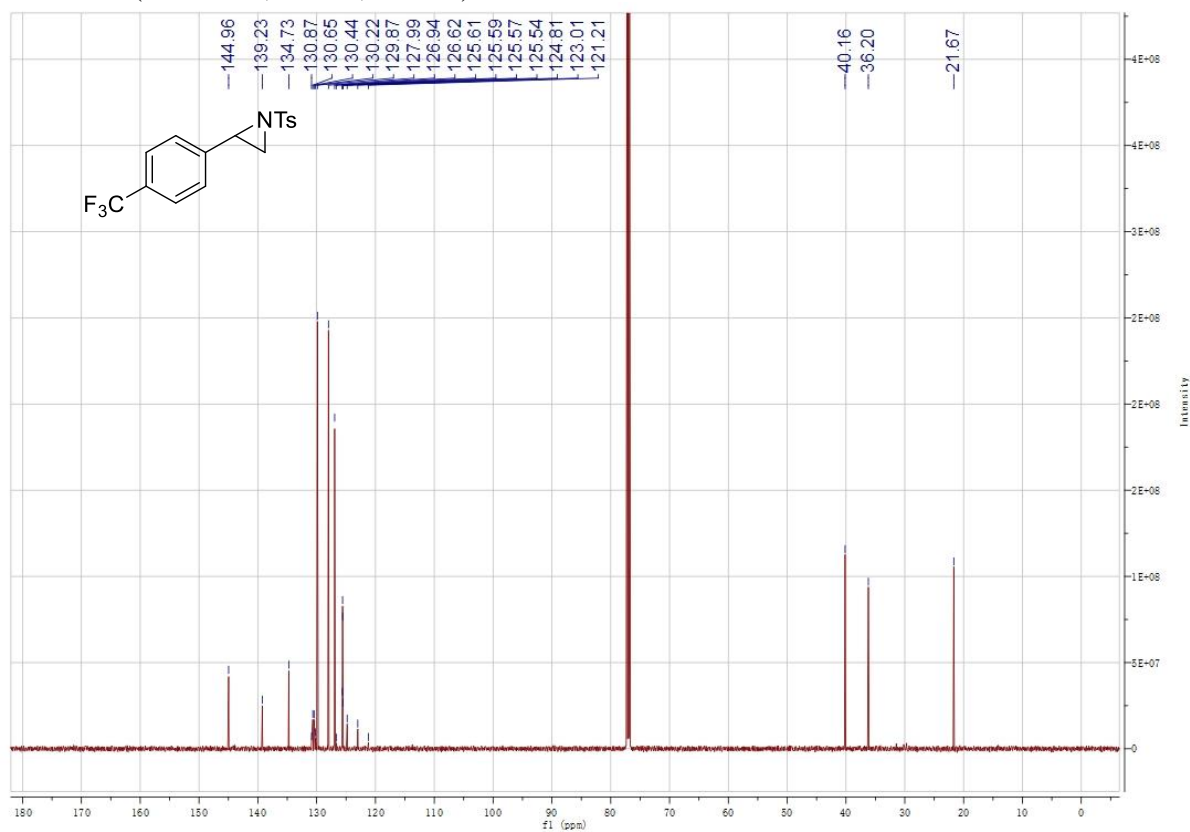

$^{19}\text{F}$  NMR (565 MHz, 293 K,  $\text{CDCl}_3$ )

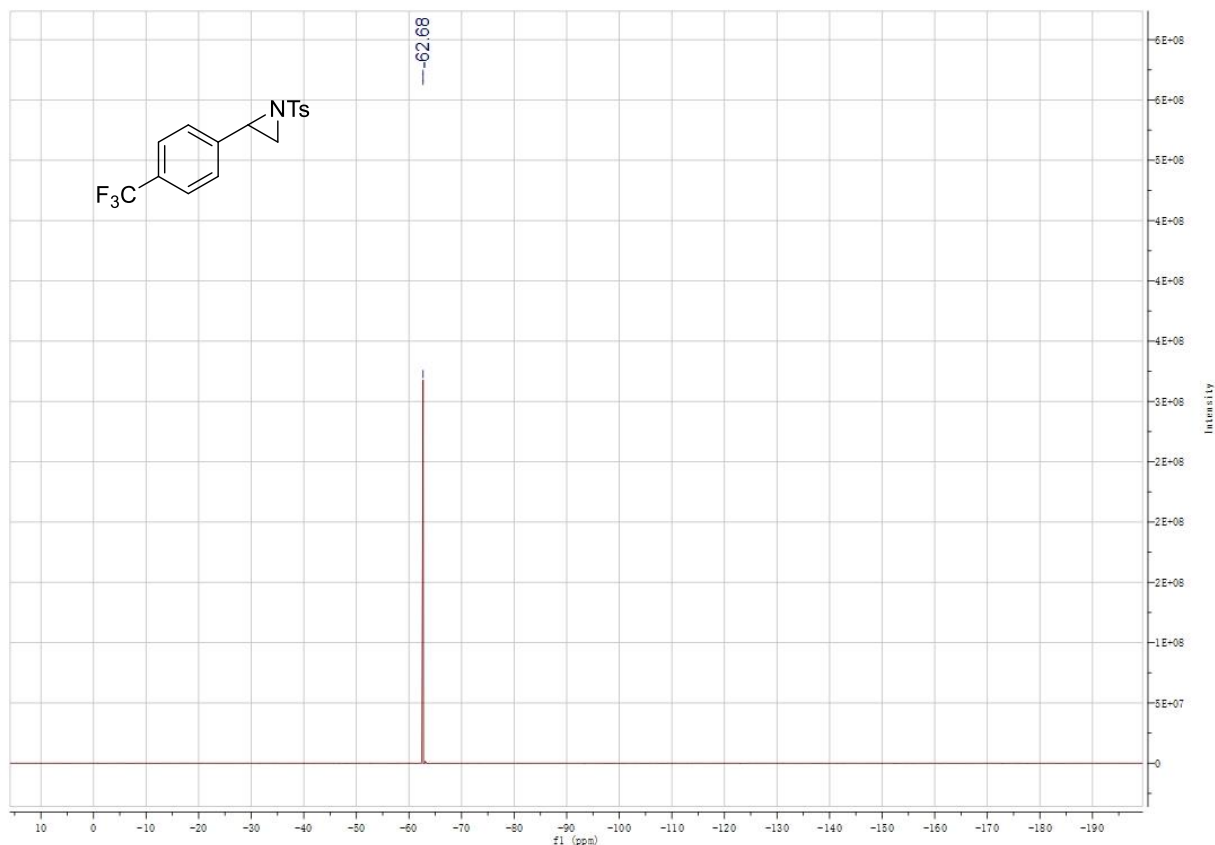

**Supplementary Figure 90. 2-(4-Fluorophenyl)-1-tosylaziridine (221)**

$^1\text{H}$  NMR (400 MHz, 293 K,  $\text{CDCl}_3$ )

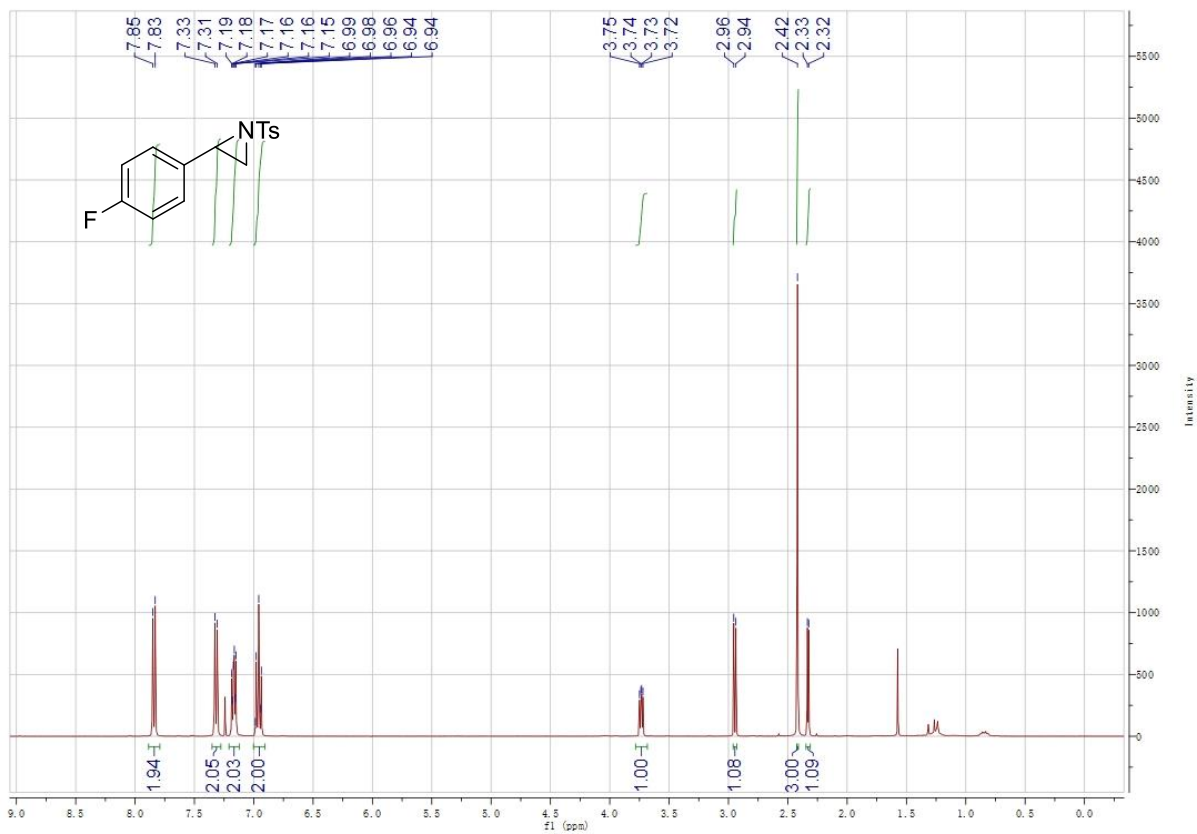



$^{13}\text{C}$  NMR (101 MHz, 293 K,  $\text{CDCl}_3$ )

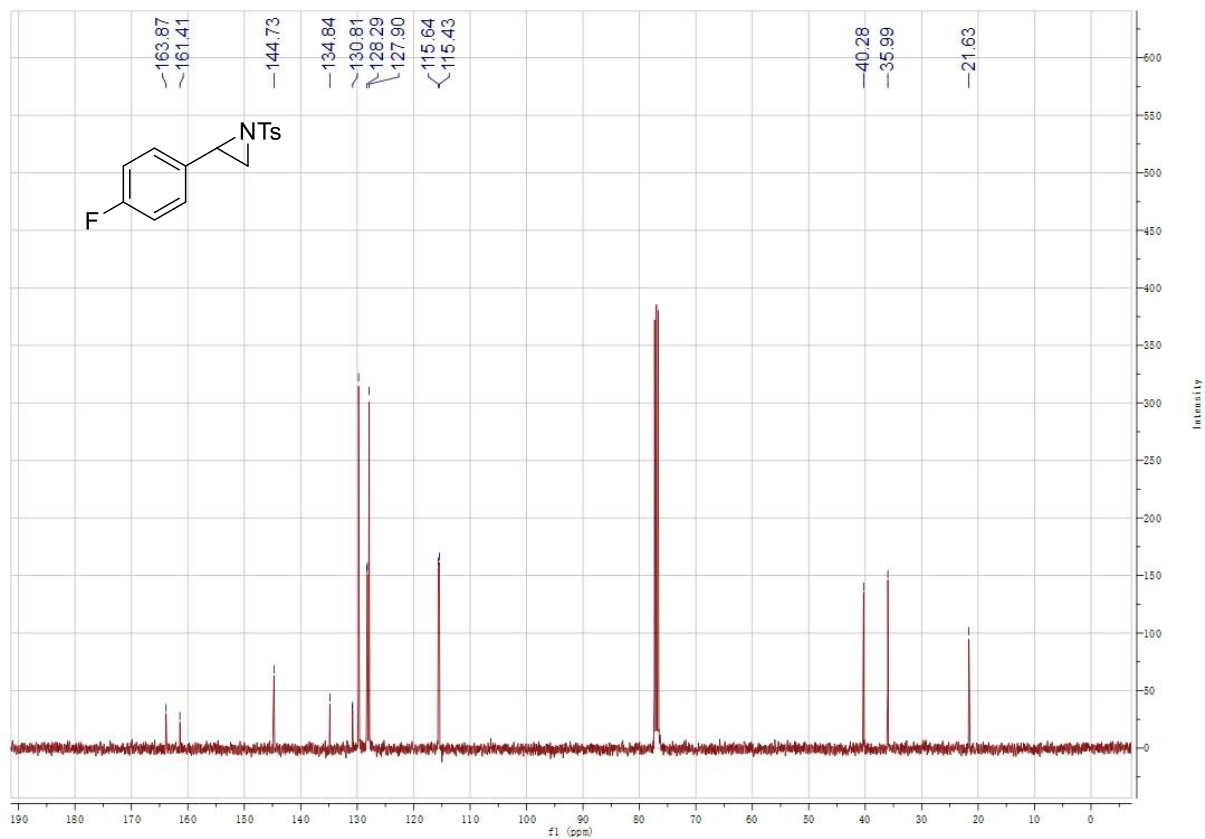

$^{19}\text{F}$  NMR (376 MHz, 293 K,  $\text{CDCl}_3$ )

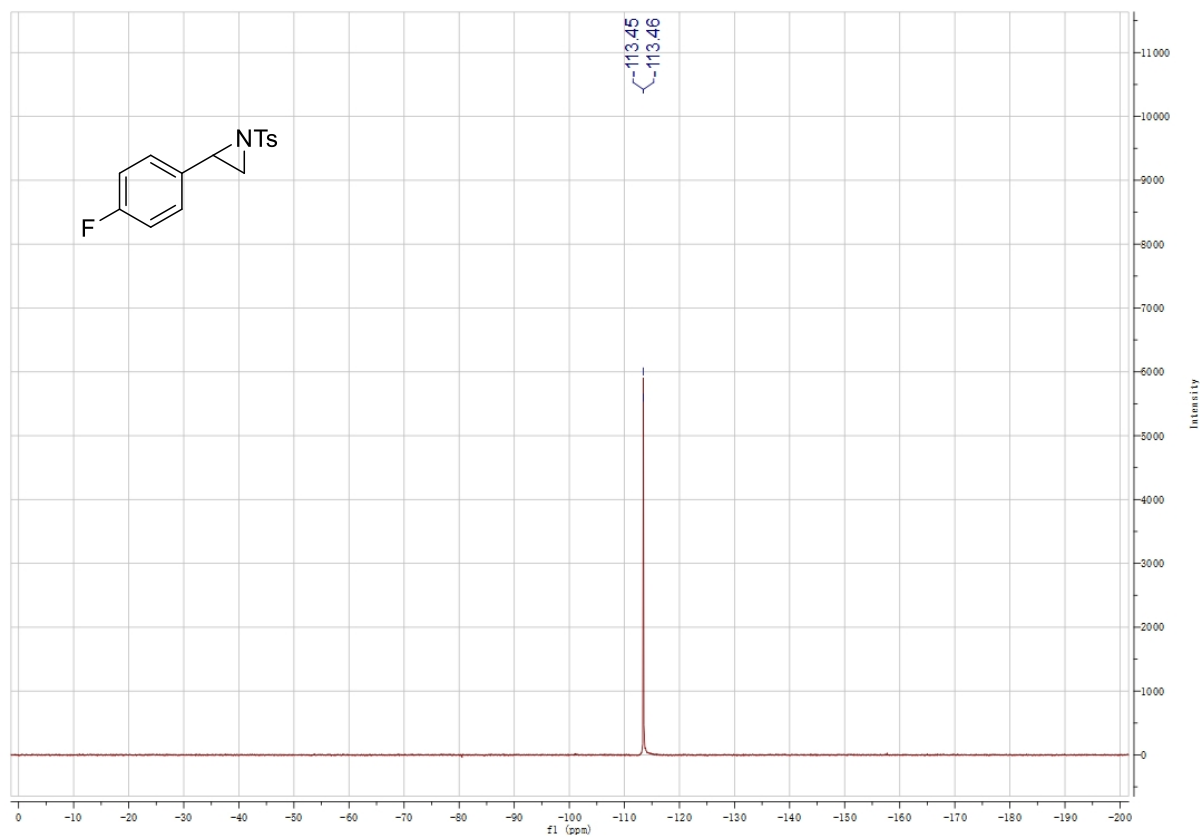

**Supplementary Figure 91. 2-(4-Chlorophenyl)-1-tosylaziridine (22m)**

<sup>1</sup>H NMR (400 MHz, 293 K, CDCl<sub>3</sub>)

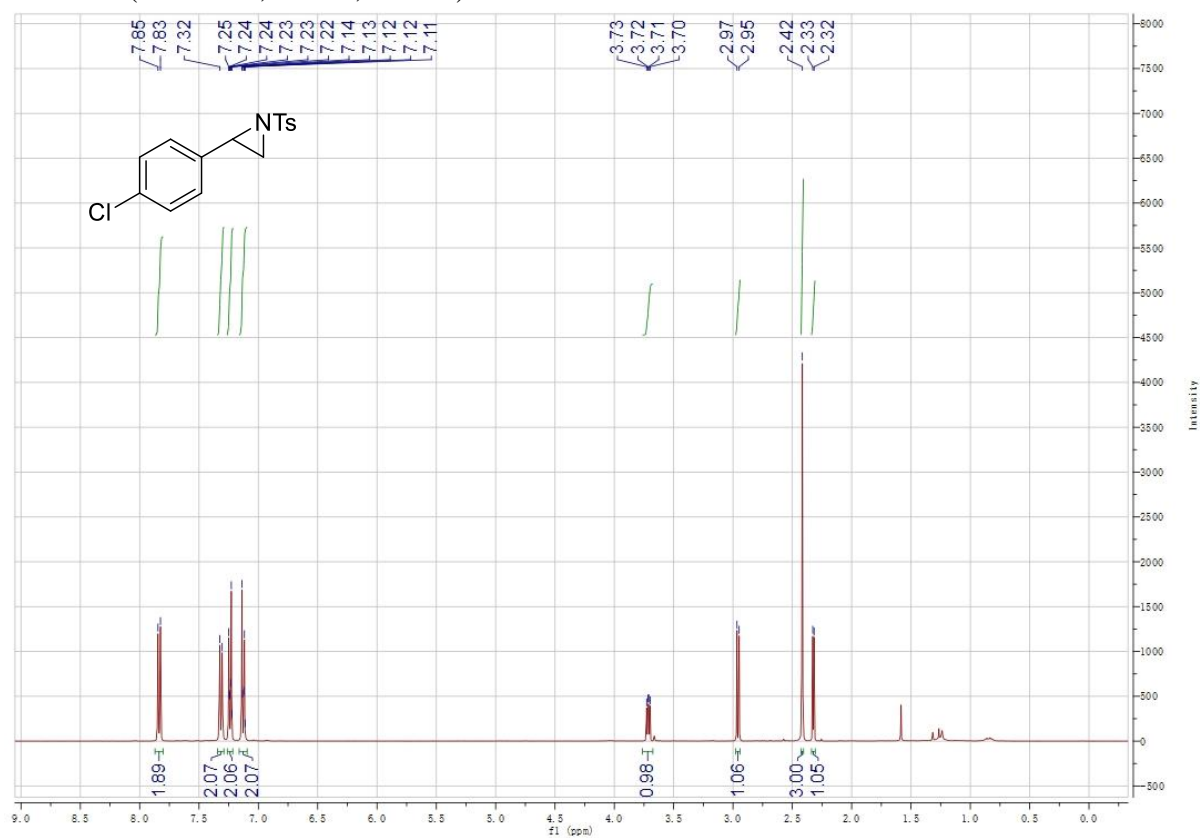

<sup>13</sup>C NMR (101 MHz, 293 K, CDCl<sub>3</sub>)

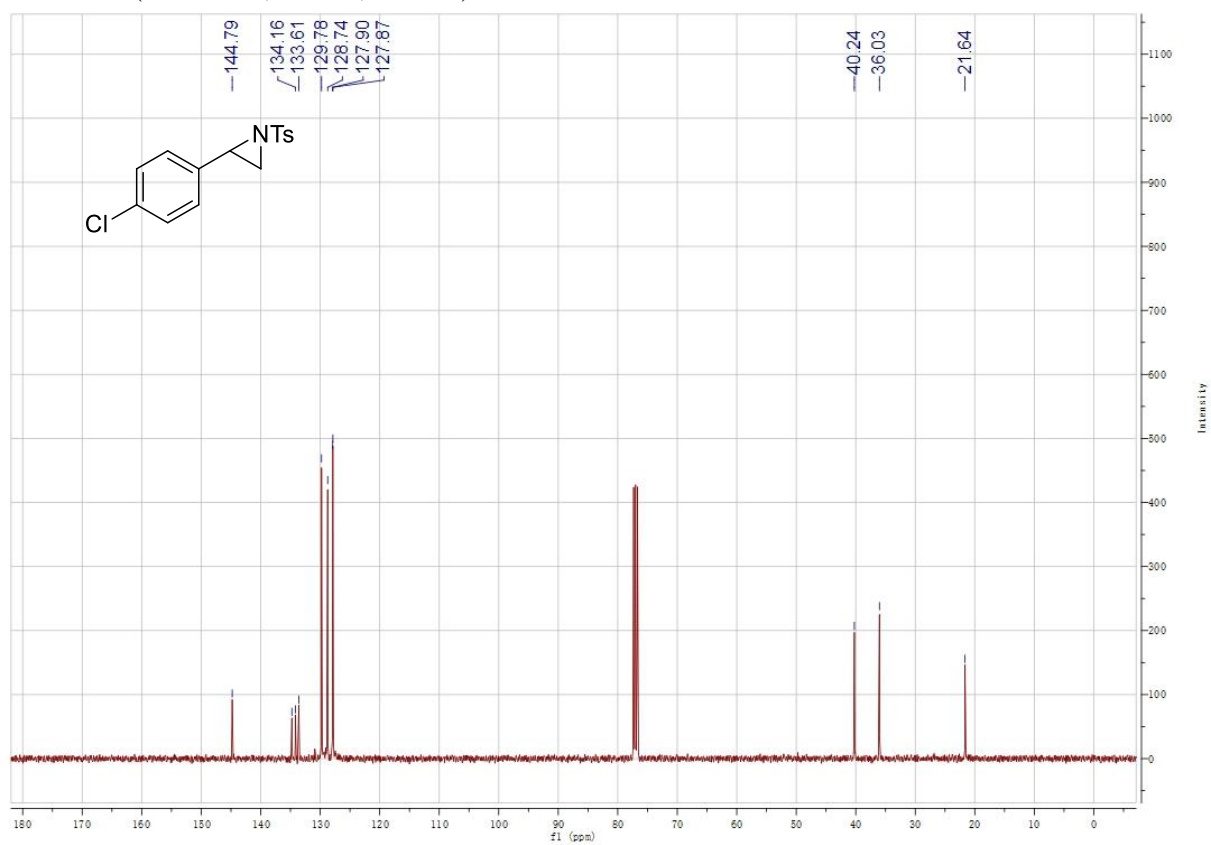

**Supplementary Figure 92.** *1-(4-Bromophenyl)-1-tosylaziridine (22n)*

$^1\text{H}$  NMR (400 MHz, 293 K,  $\text{CDCl}_3$ )

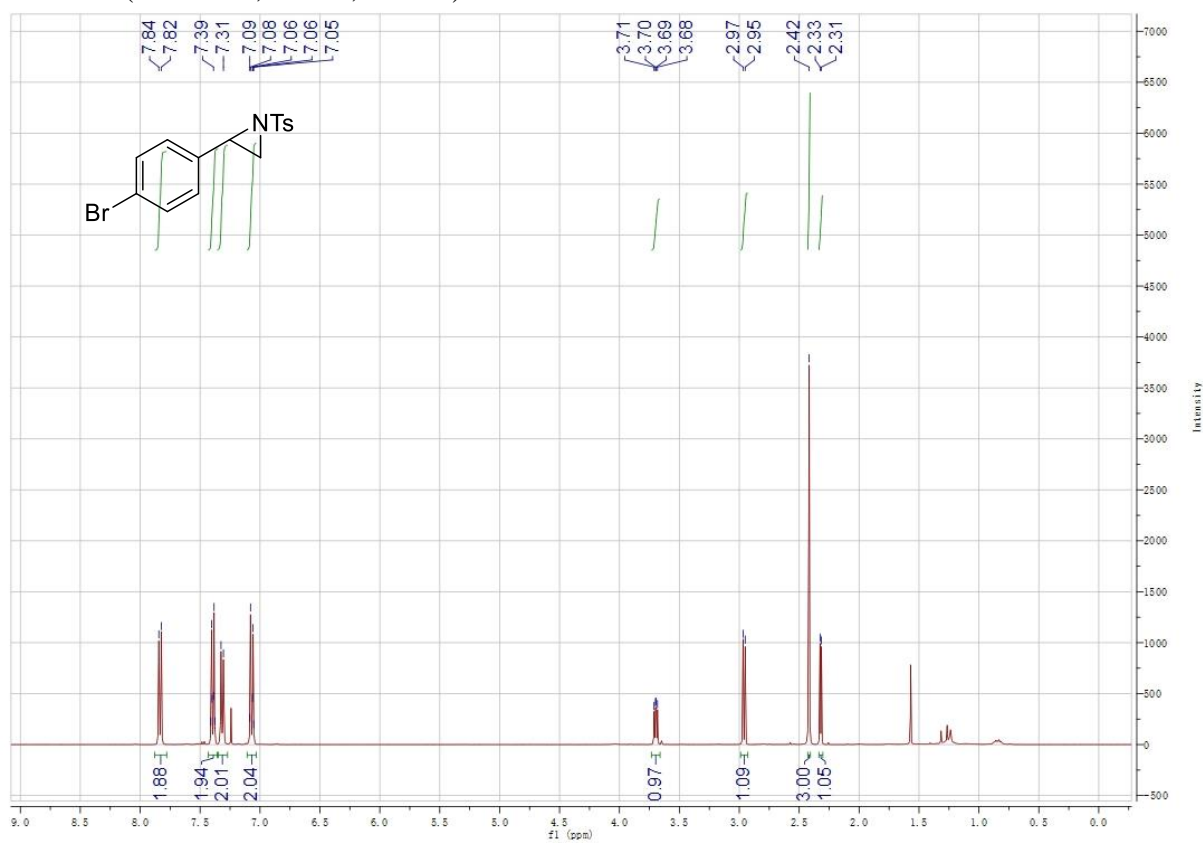

$^{13}\text{C}$  NMR (101 MHz, 293 K,  $\text{CDCl}_3$ )

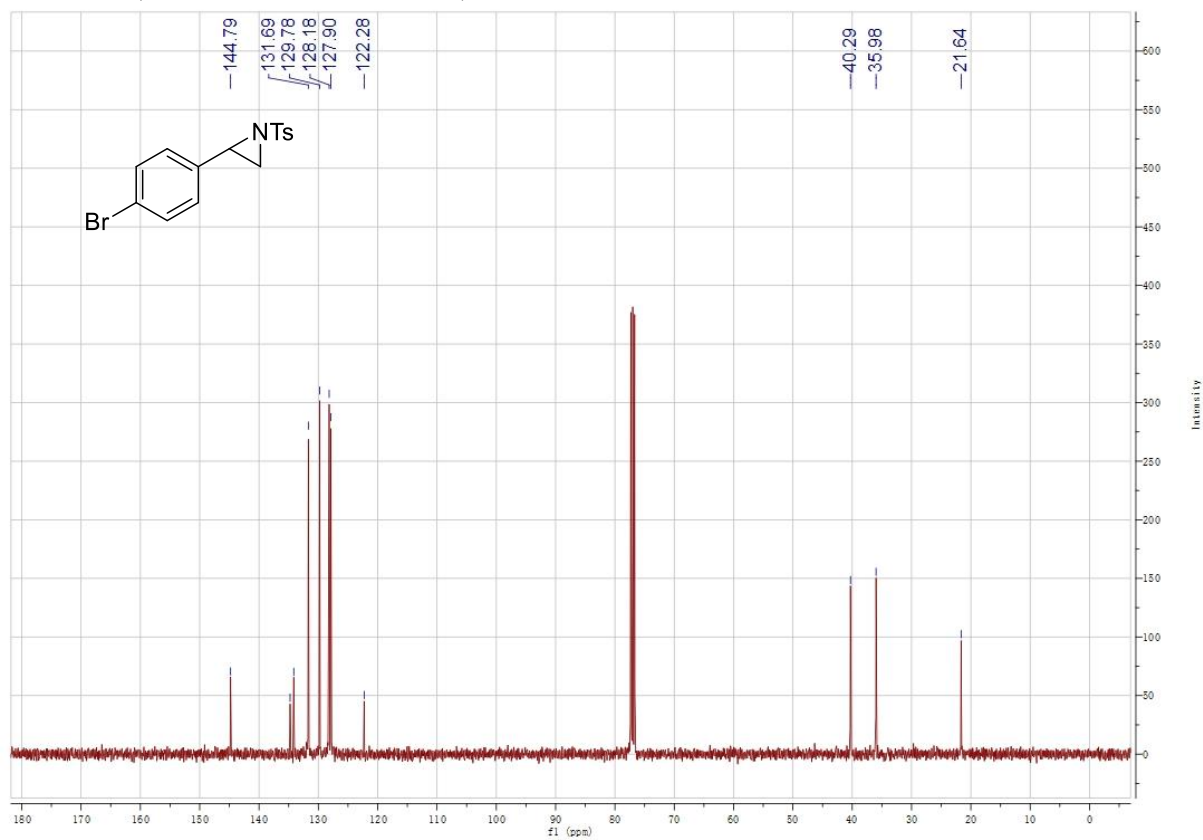

**Supplementary Figure 93.** *1-(1-Tosylaziridin-2-yl)phenyl acetate (22o)*

$^1\text{H}$  NMR (600 MHz, 293 K,  $\text{CDCl}_3$ )

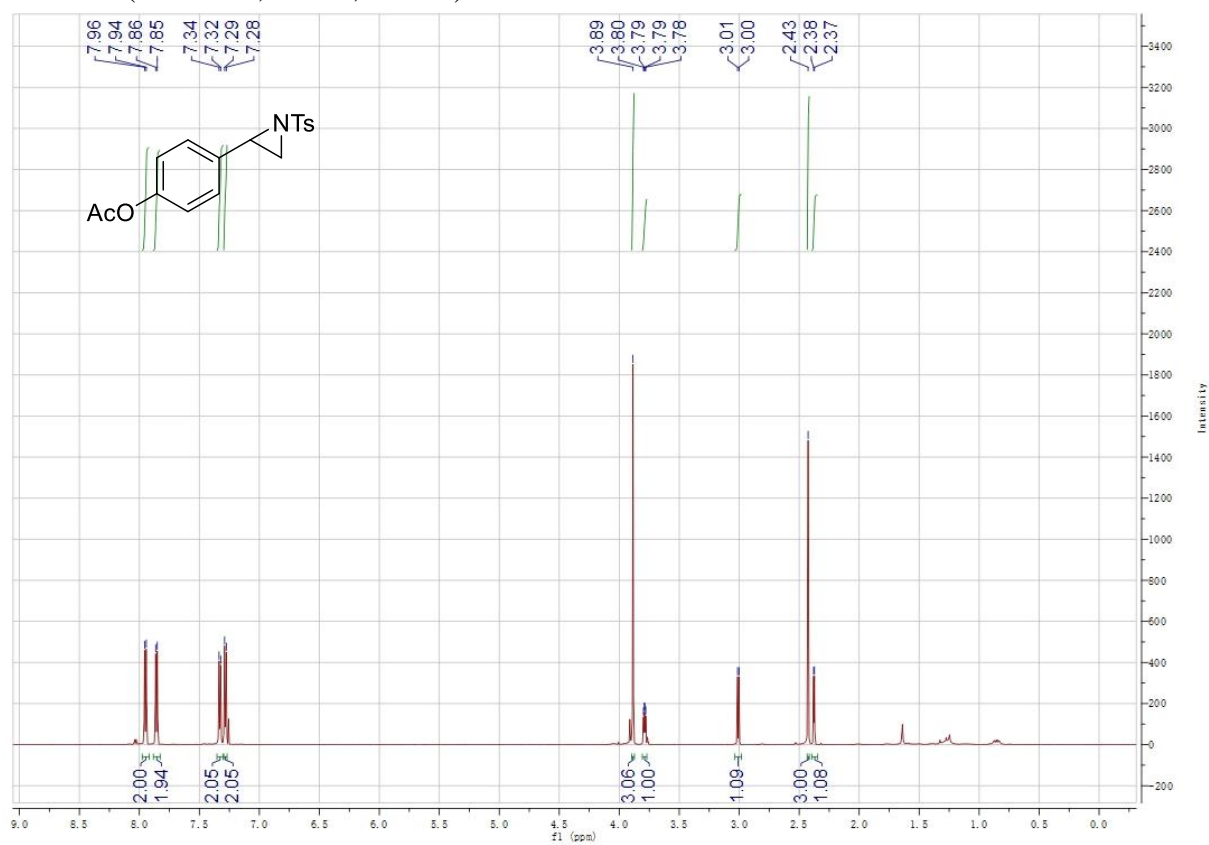

$^{13}\text{C}$  NMR (151 MHz, 293 K,  $\text{CDCl}_3$ )

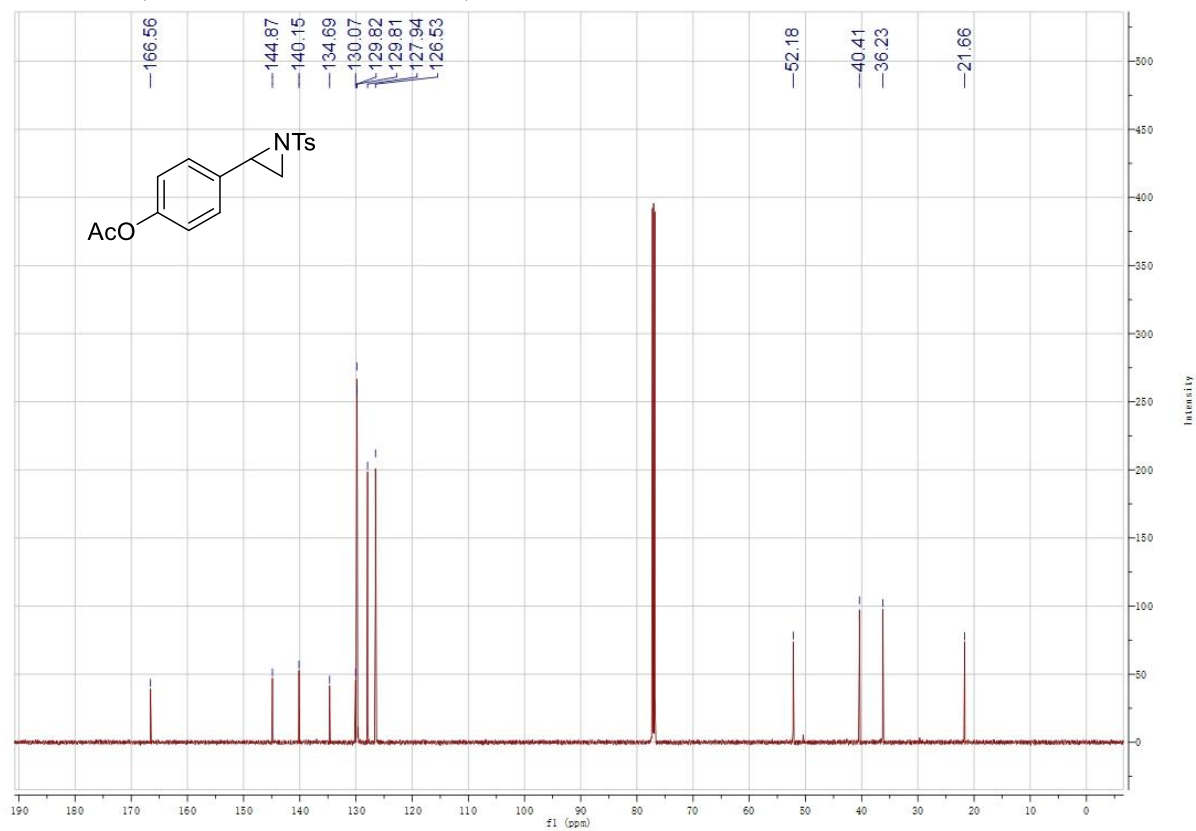

**Supplementary Figure 94.** *1-(m-Tolyl)-1-tosylaziridine (22p)*

$^1\text{H}$  NMR (400 MHz, 293 K,  $\text{CDCl}_3$ )

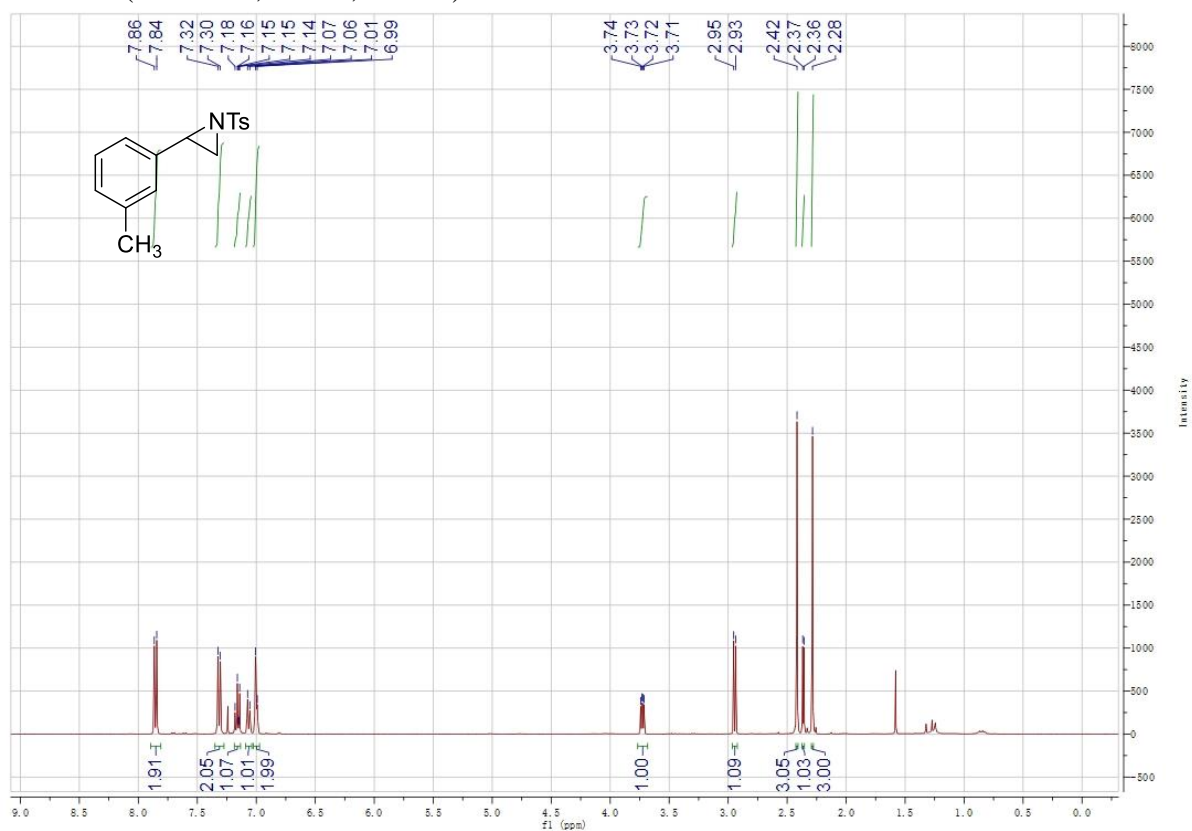

$^{13}\text{C}$  NMR (101 MHz, 293 K,  $\text{CDCl}_3$ )

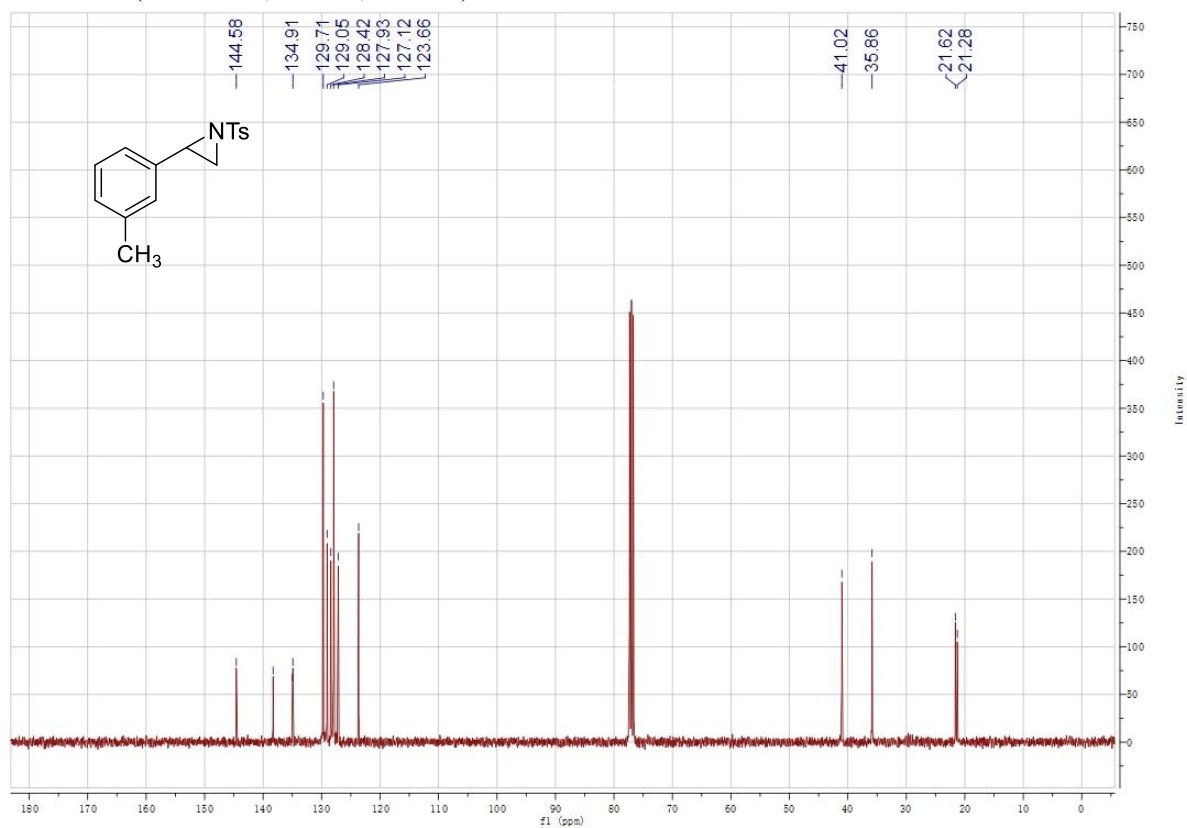

**Supplementary Figure 95.** *1-Tosyl-2-(3-(trifluoromethyl)phenyl)aziridine (22q)*

<sup>1</sup>H NMR (600 MHz, 293 K, CDCl<sub>3</sub>)

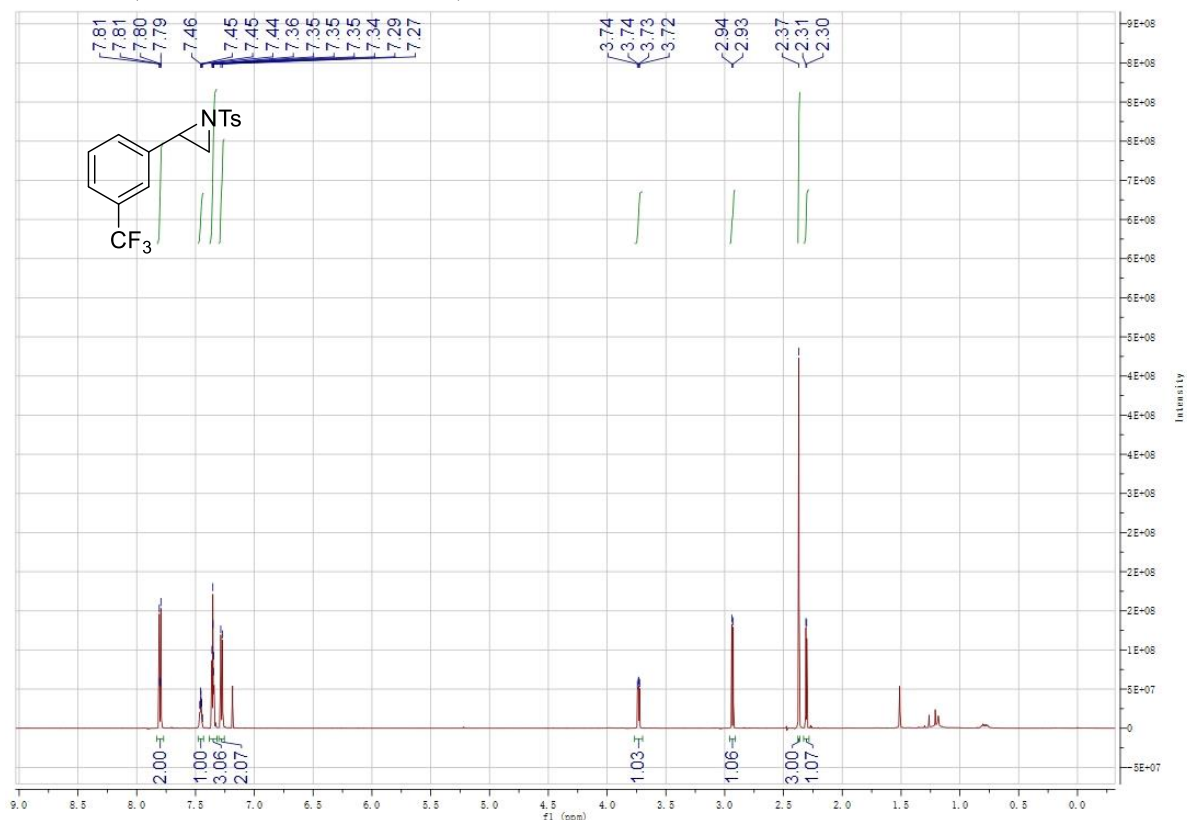

<sup>13</sup>C NMR (151 MHz, 293 K, CDCl<sub>3</sub>)

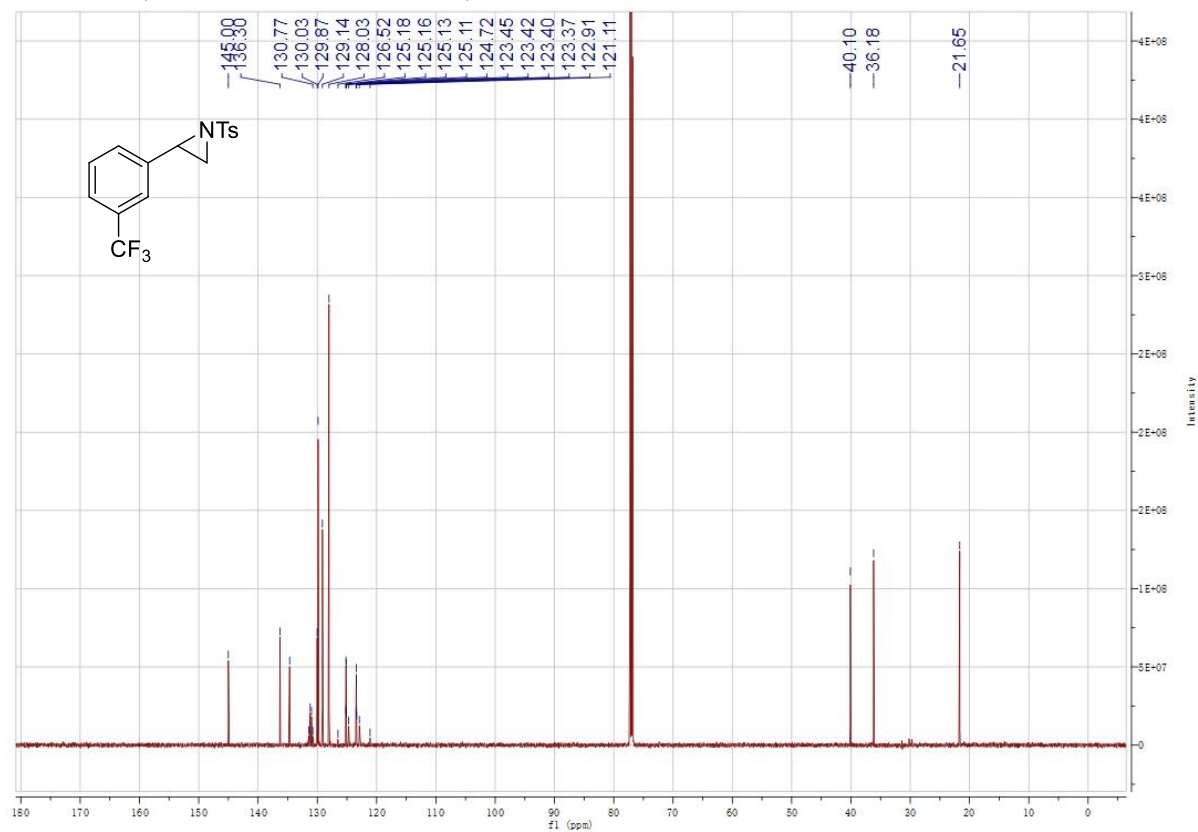

$^{19}\text{F}$  NMR (565 MHz, 293 K,  $\text{CDCl}_3$ )

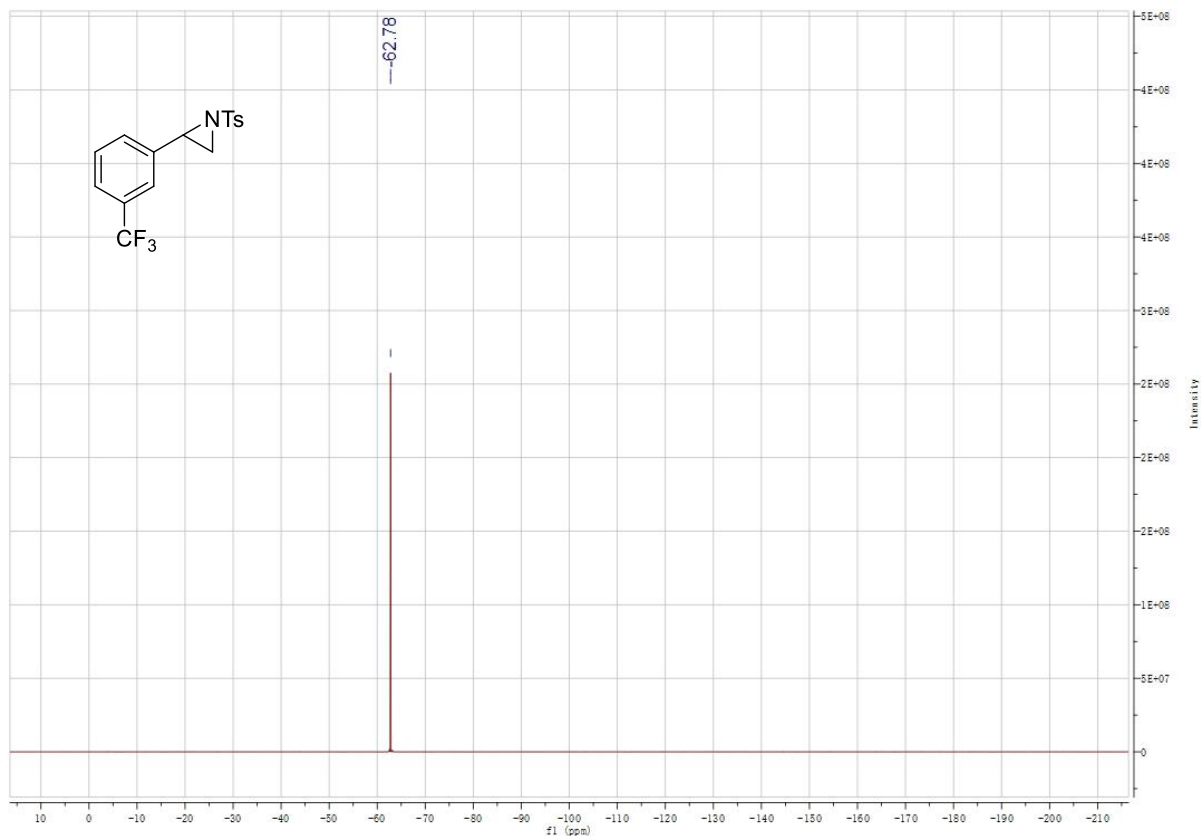

**Supplementary Figure 96.** *1-(3-Nitrophenyl)-1-tosylaziridine (22r)*

$^1\text{H}$  NMR (600 MHz, 293 K,  $\text{CDCl}_3$ )

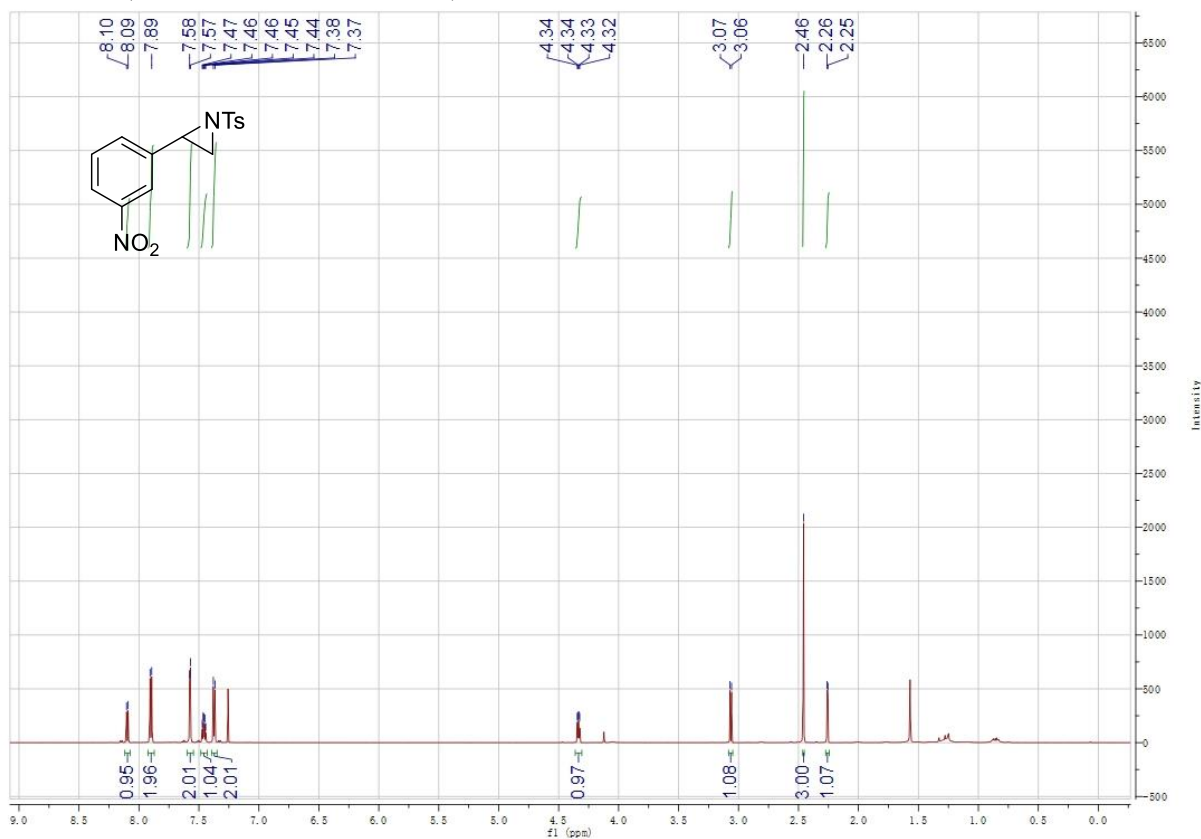

$^{13}\text{C}$  NMR (151 MHz, 293 K,  $\text{CDCl}_3$ )

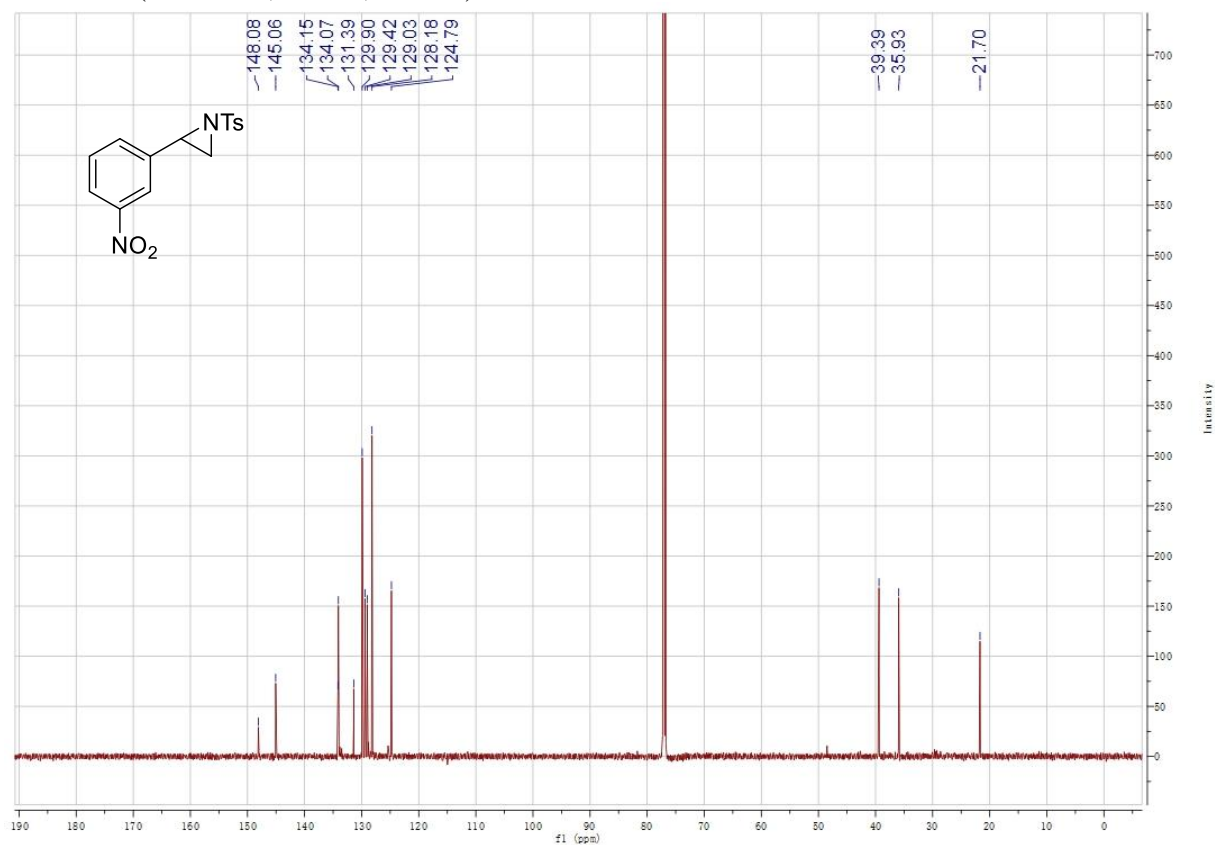

**Supplementary Figure 97.** 1-(2-Fluorophenyl)-1-tosylaziridine (22s)

$^1\text{H}$  NMR (400 MHz, 293 K,  $\text{CDCl}_3$ )

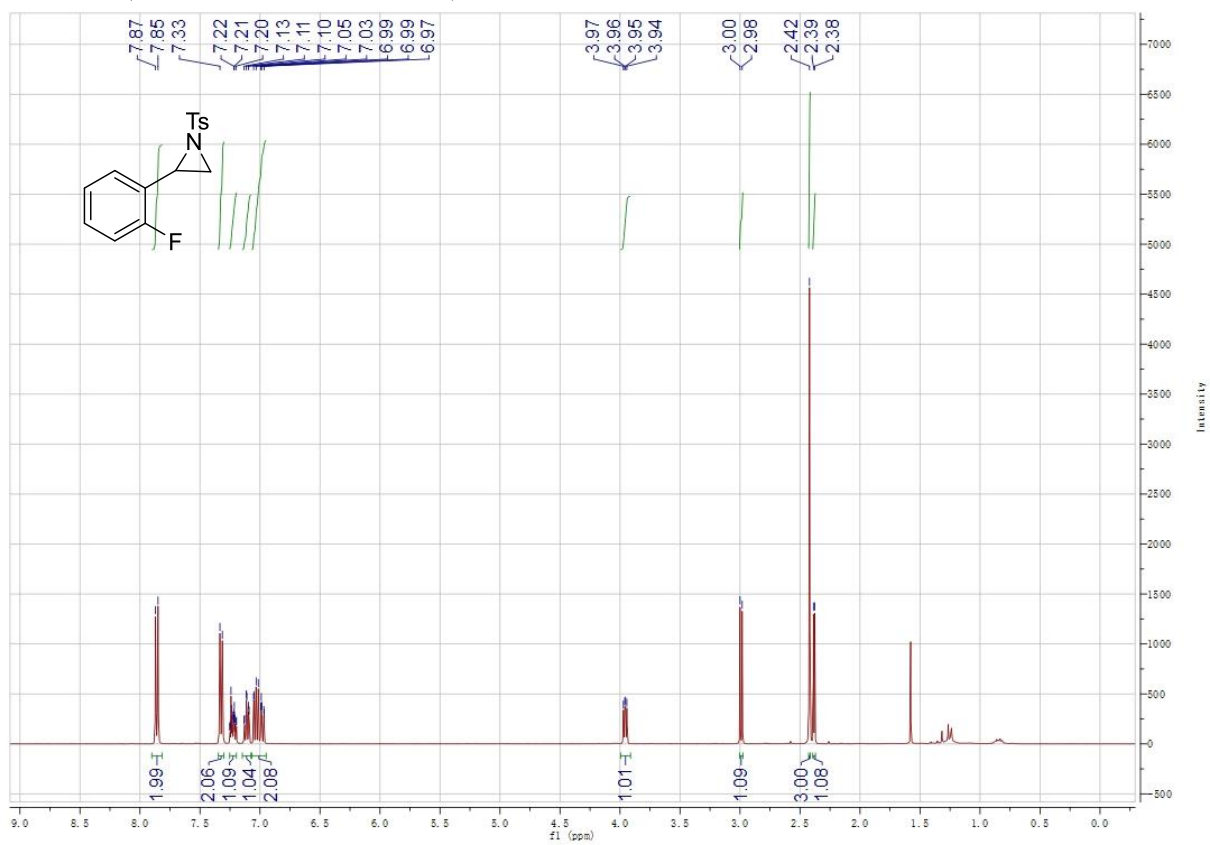



$^{13}\text{C}$  NMR (101 MHz, 293 K,  $\text{CDCl}_3$ )

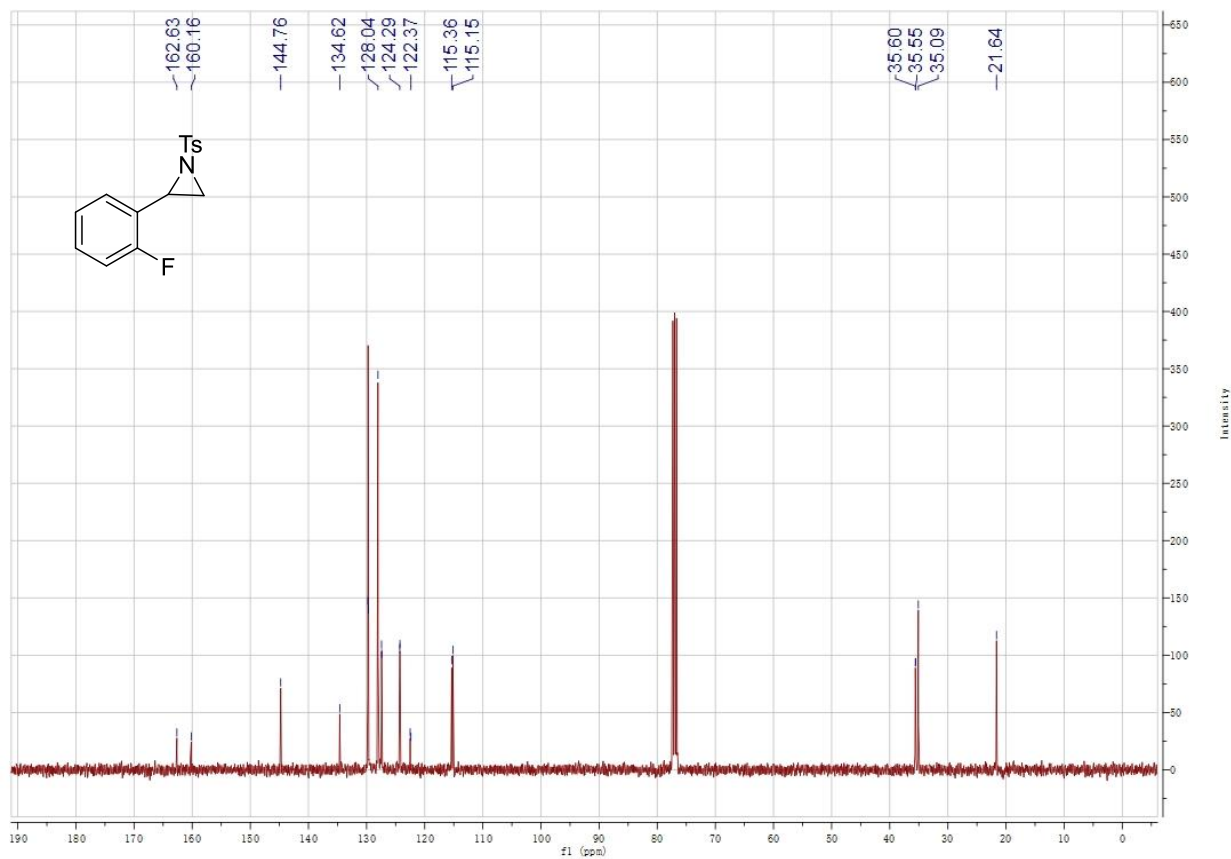

$^{19}\text{F}$  NMR (376 MHz, 293 K,  $\text{CDCl}_3$ )

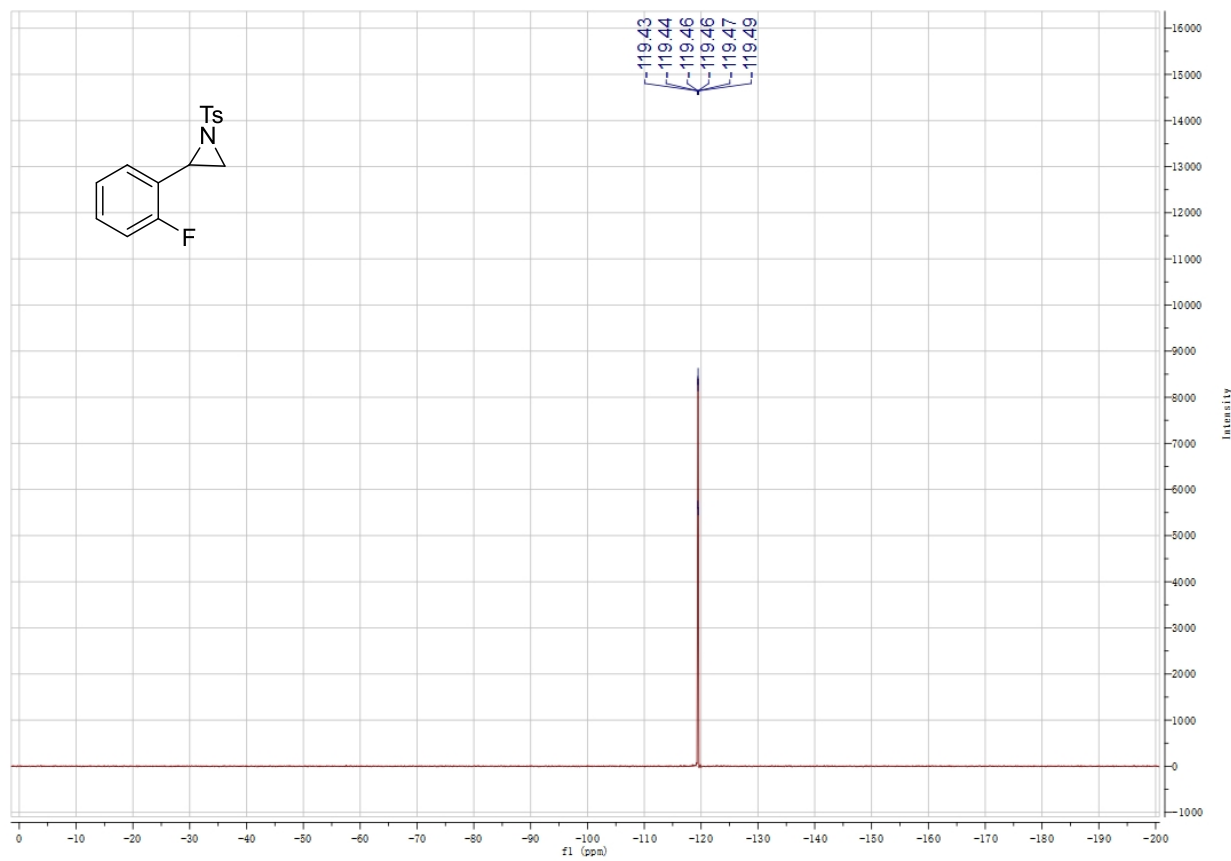

**Supplementary Figure 98.** *1-(2,6-Dichlorophenyl)-1-tosylaziridine (22t)*

$^1\text{H}$  NMR (600 MHz, 293 K,  $\text{CDCl}_3$ )

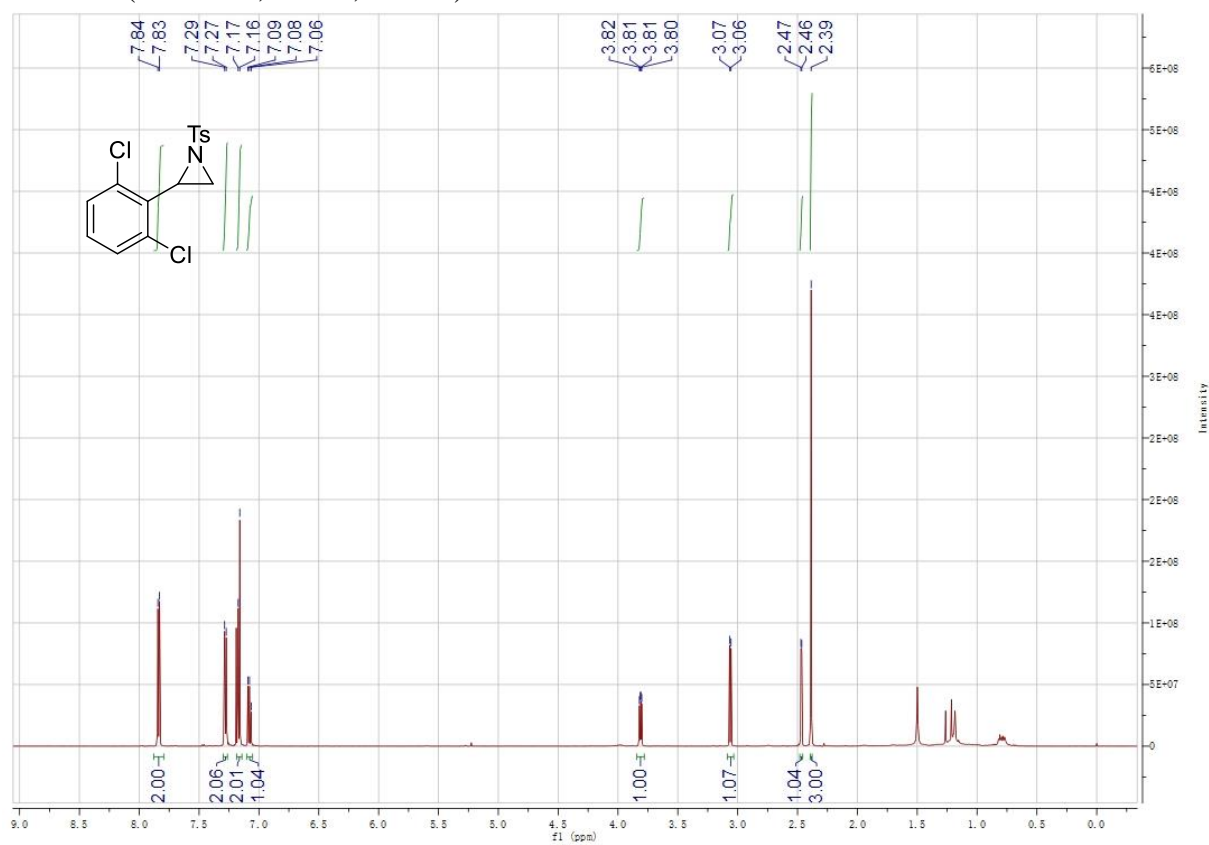

$^{13}\text{C}$  NMR (151 MHz, 293 K,  $\text{CDCl}_3$ )

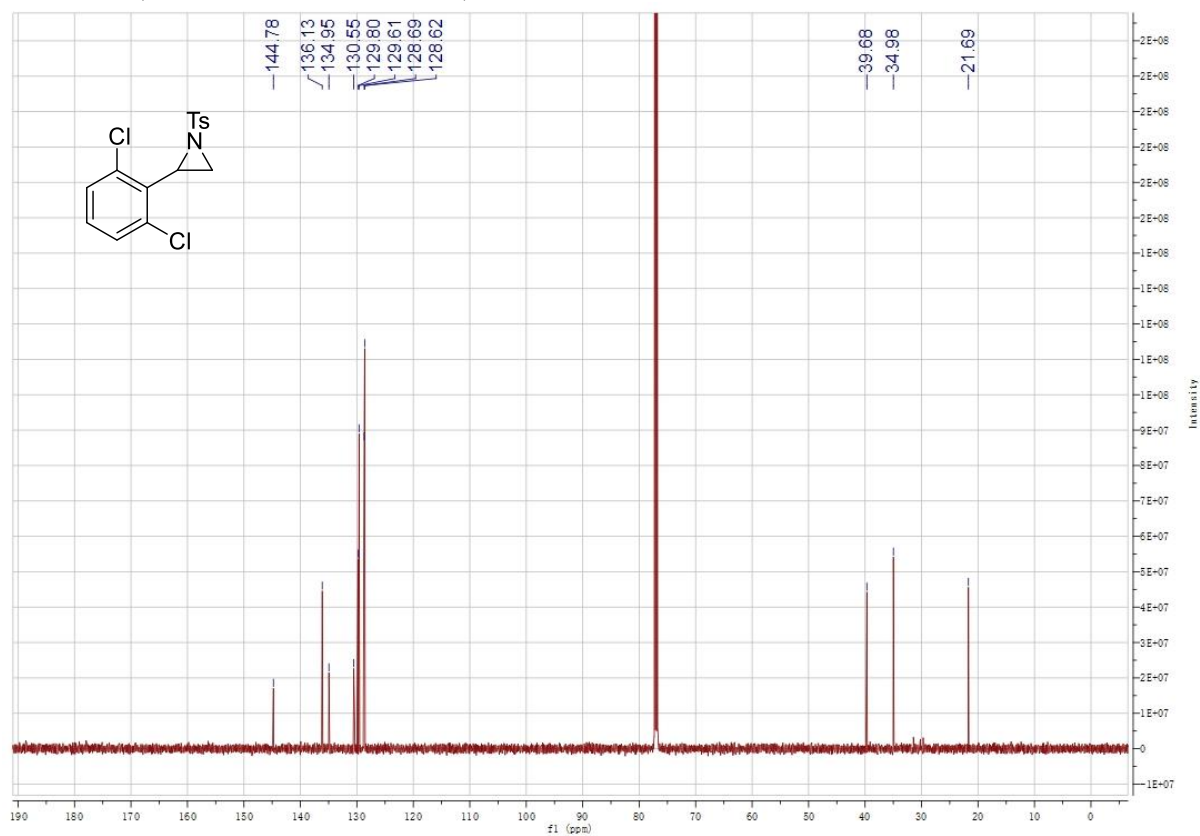

**Supplementary Figure 99.** *1-Tosyl-1,1a,6,6a-tetrahydroindeno[1,2-b]azirine (22u)*  
 $^1\text{H}$  NMR (600 MHz, 293 K,  $\text{CDCl}_3$ )

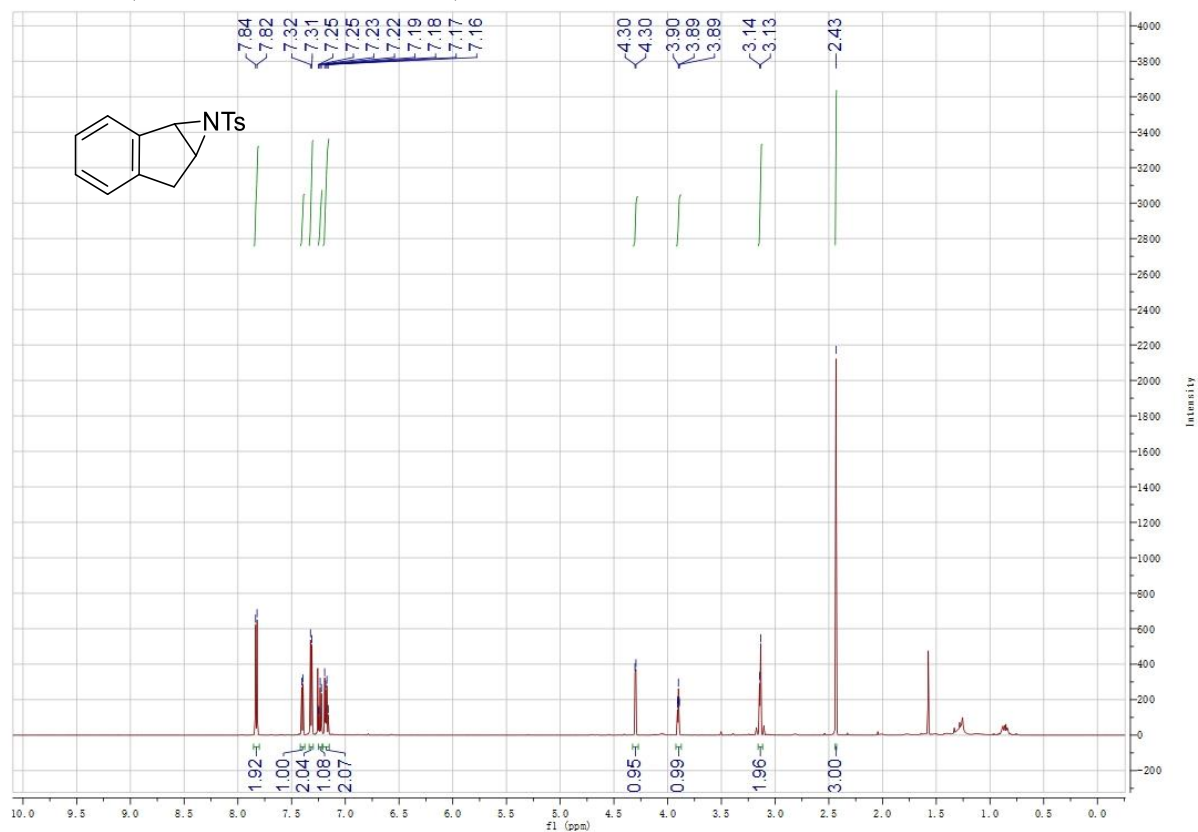

$^{13}\text{C}$  NMR (151 MHz, 293 K,  $\text{CDCl}_3$ )

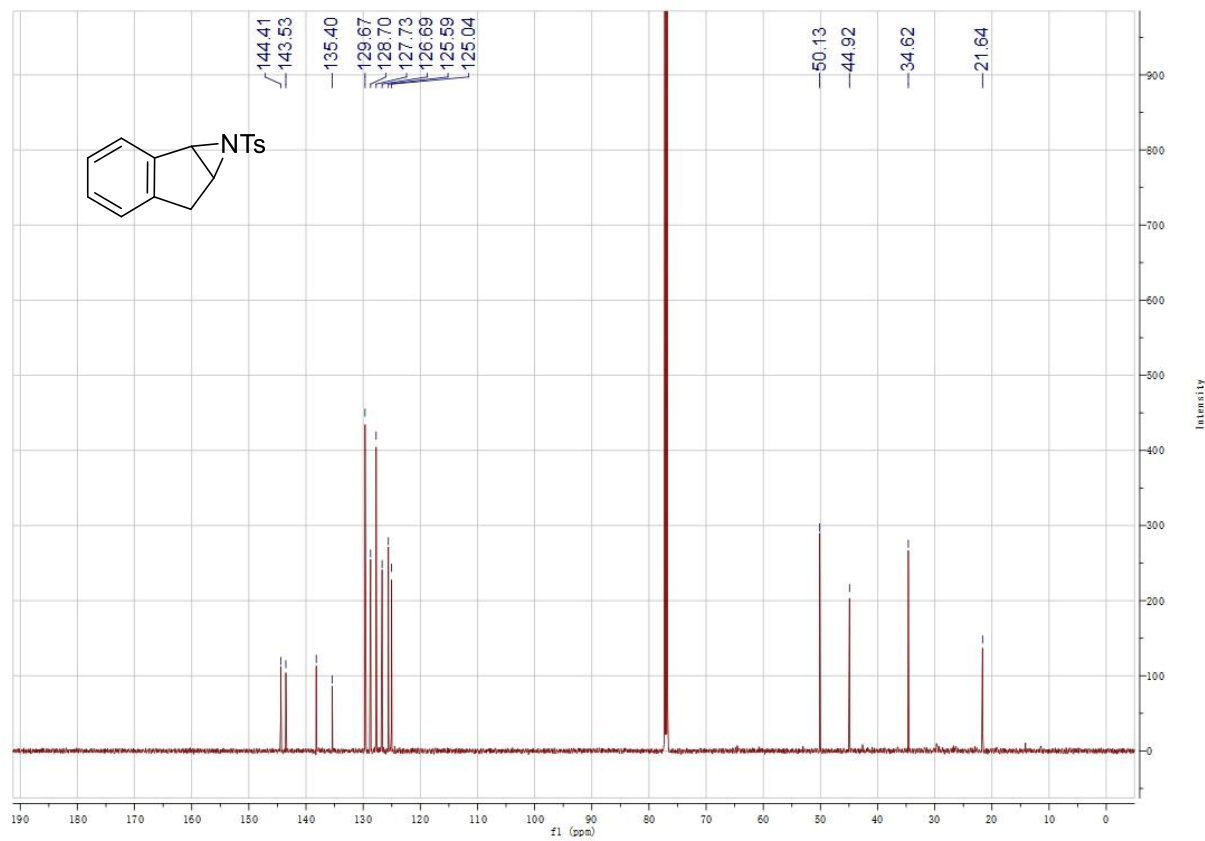

**Supplementary Figure 100. 2-Cyclohexyl-1-tosylaziridine (23a)**

<sup>1</sup>H NMR (400 MHz, 293 K, CDCl<sub>3</sub>)

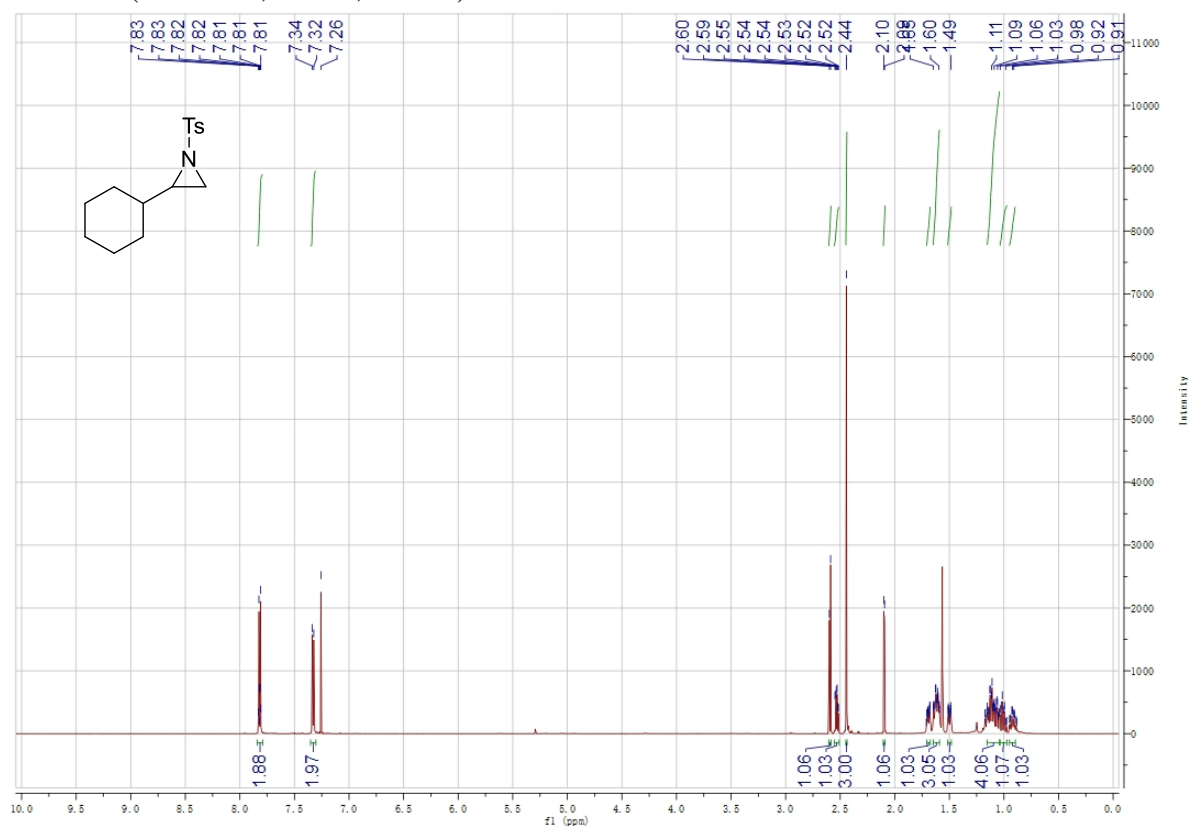

<sup>13</sup>C NMR (101 MHz, 293 K, CDCl<sub>3</sub>)

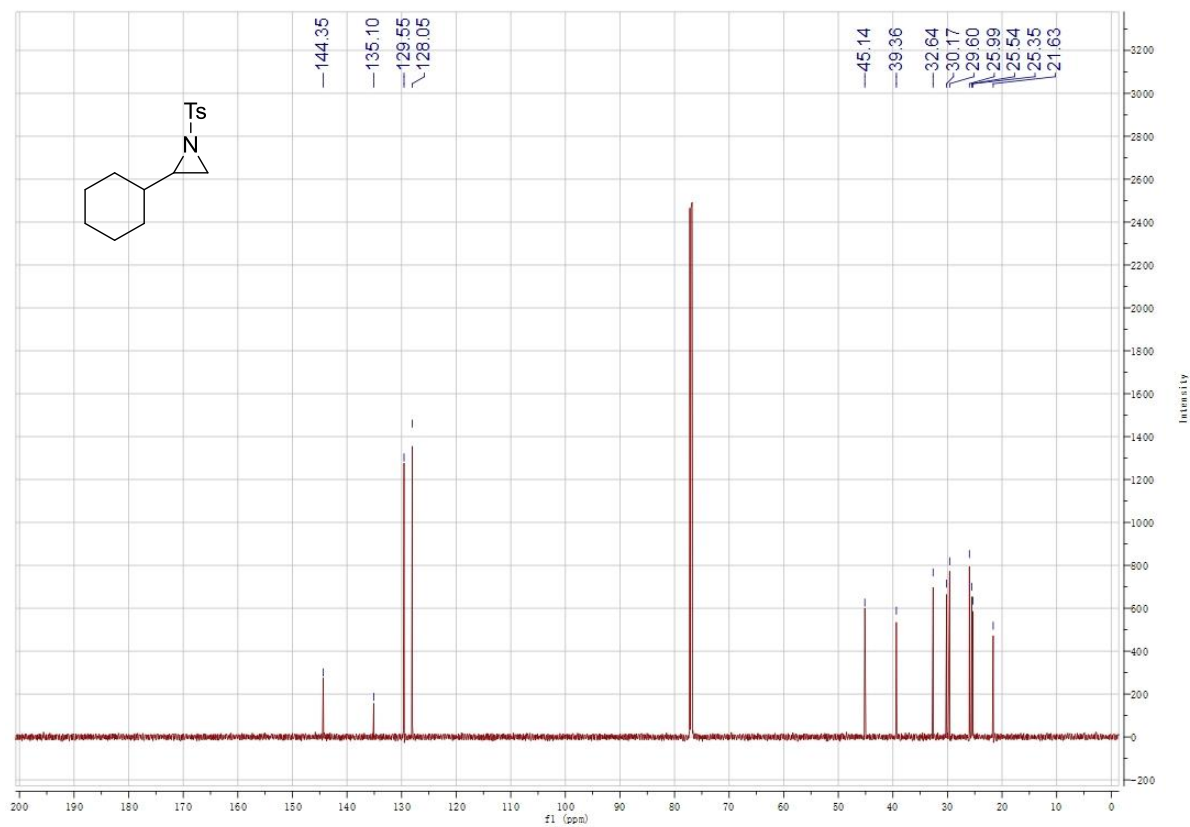

**Supplementary Figure 101. 2-Butyl-1-tosylaziridine (23b)**

<sup>1</sup>H NMR (400 MHz, 293 K, CDCl<sub>3</sub>)

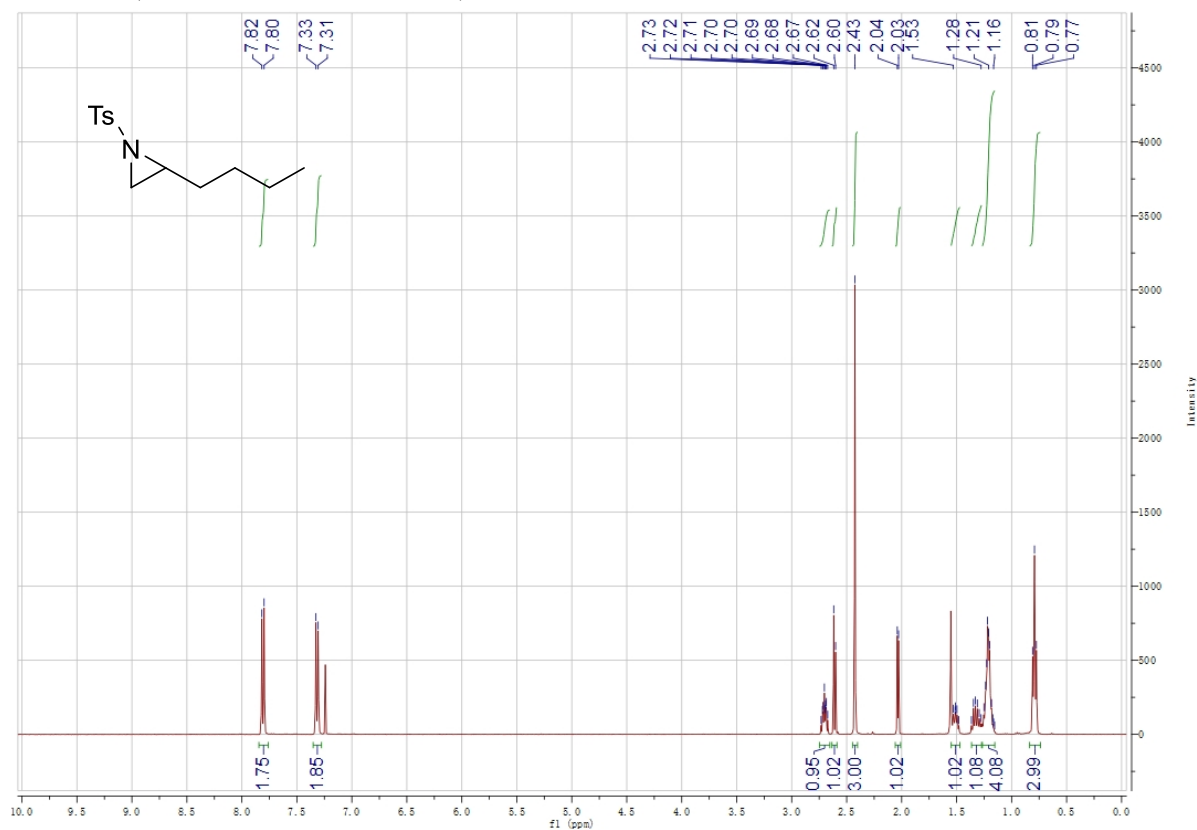

<sup>13</sup>C NMR (101 MHz, 293 K, CDCl<sub>3</sub>)

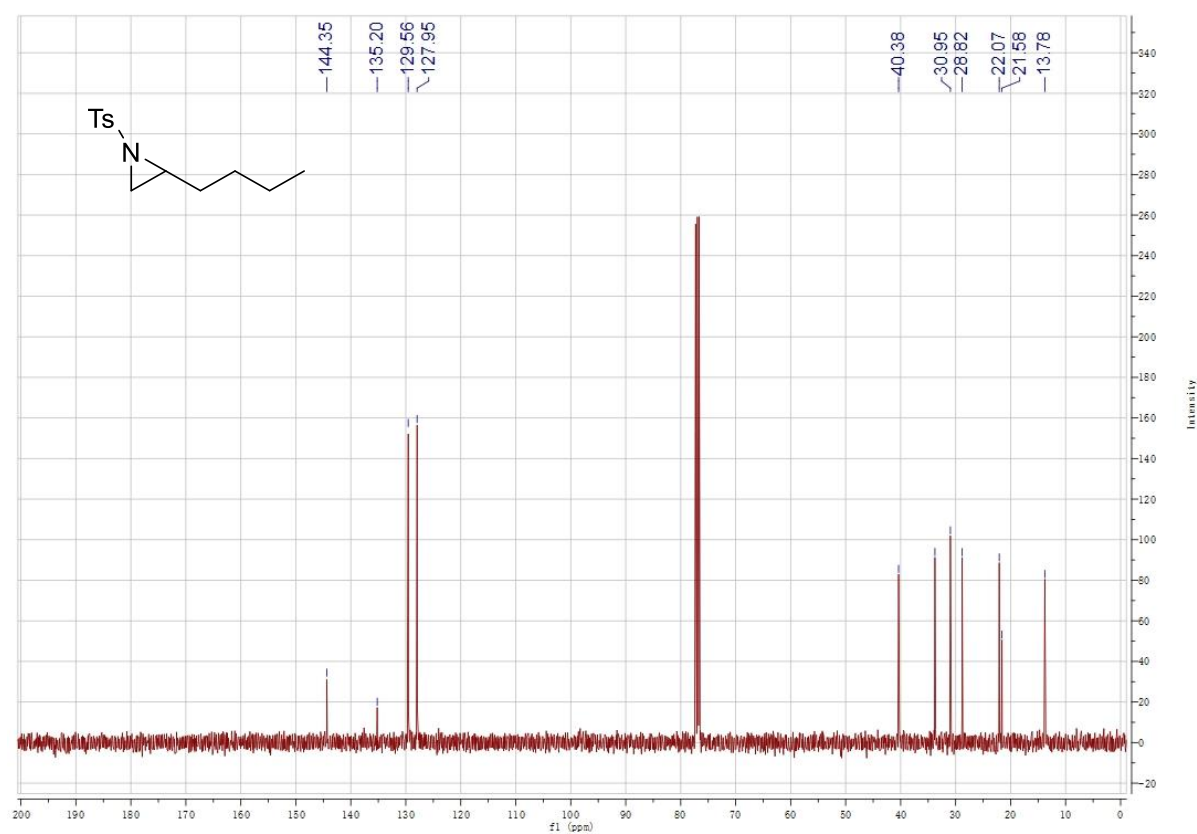

### Supplementary Figure 102. 2-Hexyl-1-tosylaziridine (23c)

$^1\text{H}$  NMR (400 MHz, 293 K,  $\text{CDCl}_3$ )

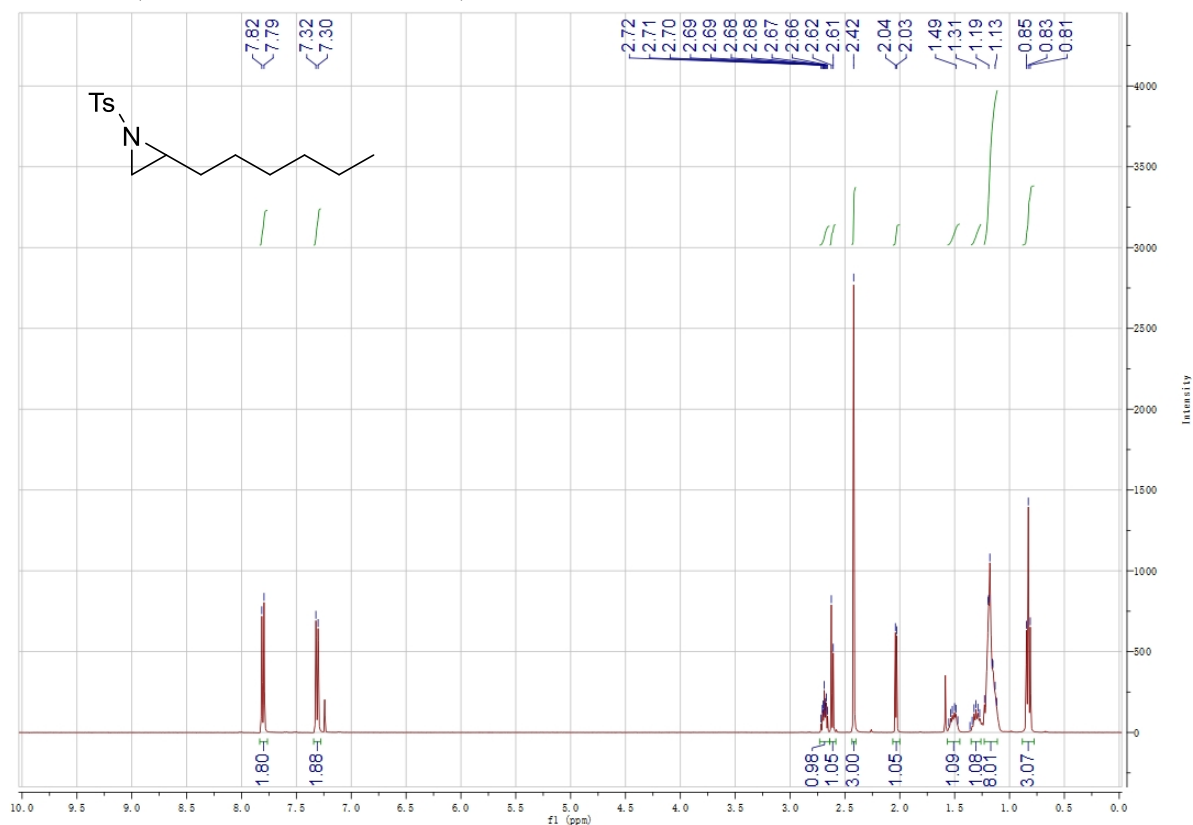

$^{13}\text{C}$  NMR (101 MHz, 293 K,  $\text{CDCl}_3$ )

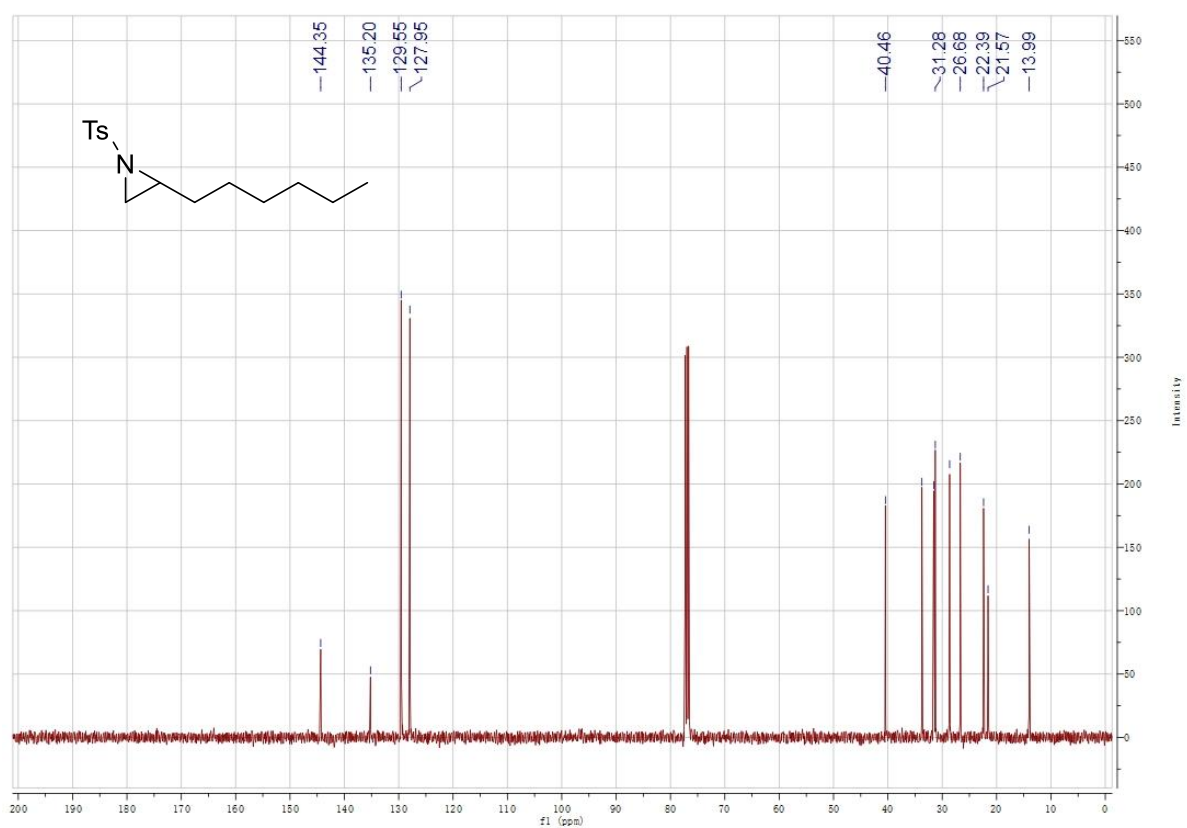

**Supplementary Figure 103. 2-Dodecyl-1-tosylaziridine (23d)**

$^1\text{H}$  NMR (400 MHz, 293 K,  $\text{CDCl}_3$ )

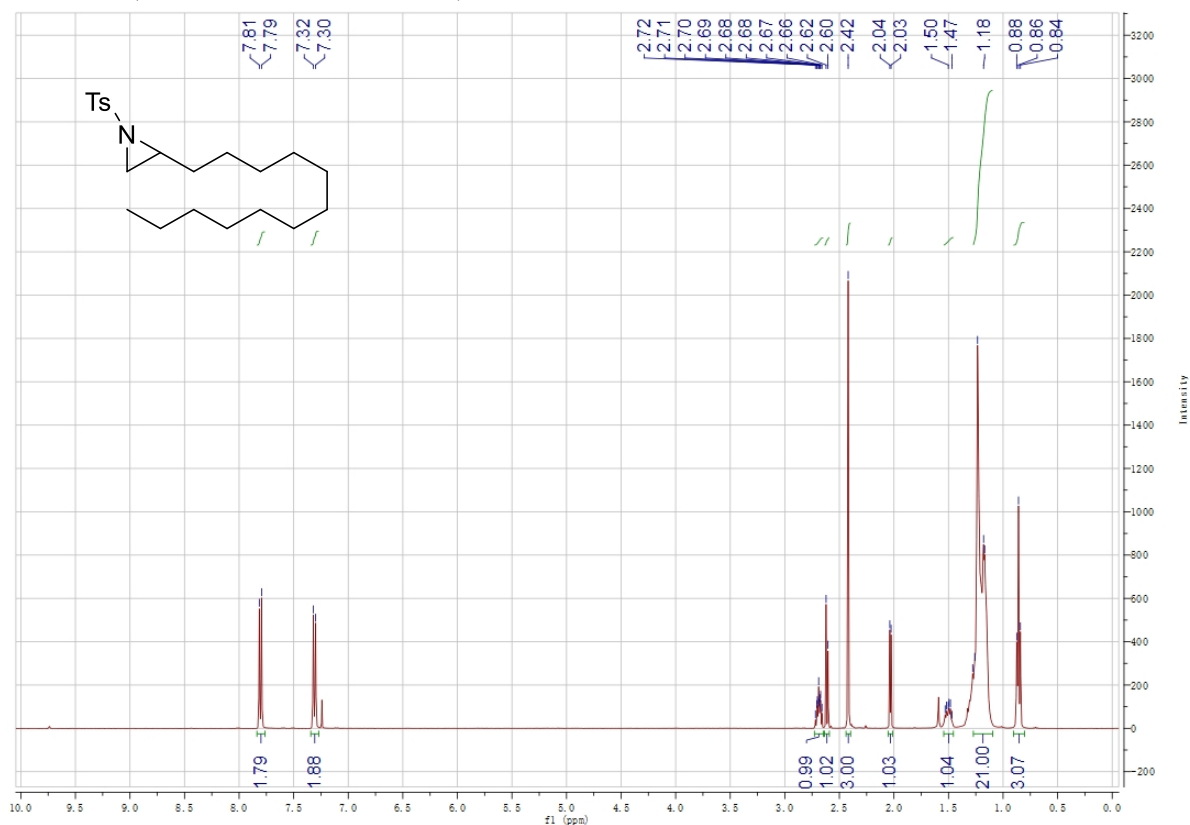

$^{13}\text{C}$  NMR (101 MHz, 293 K,  $\text{CDCl}_3$ )

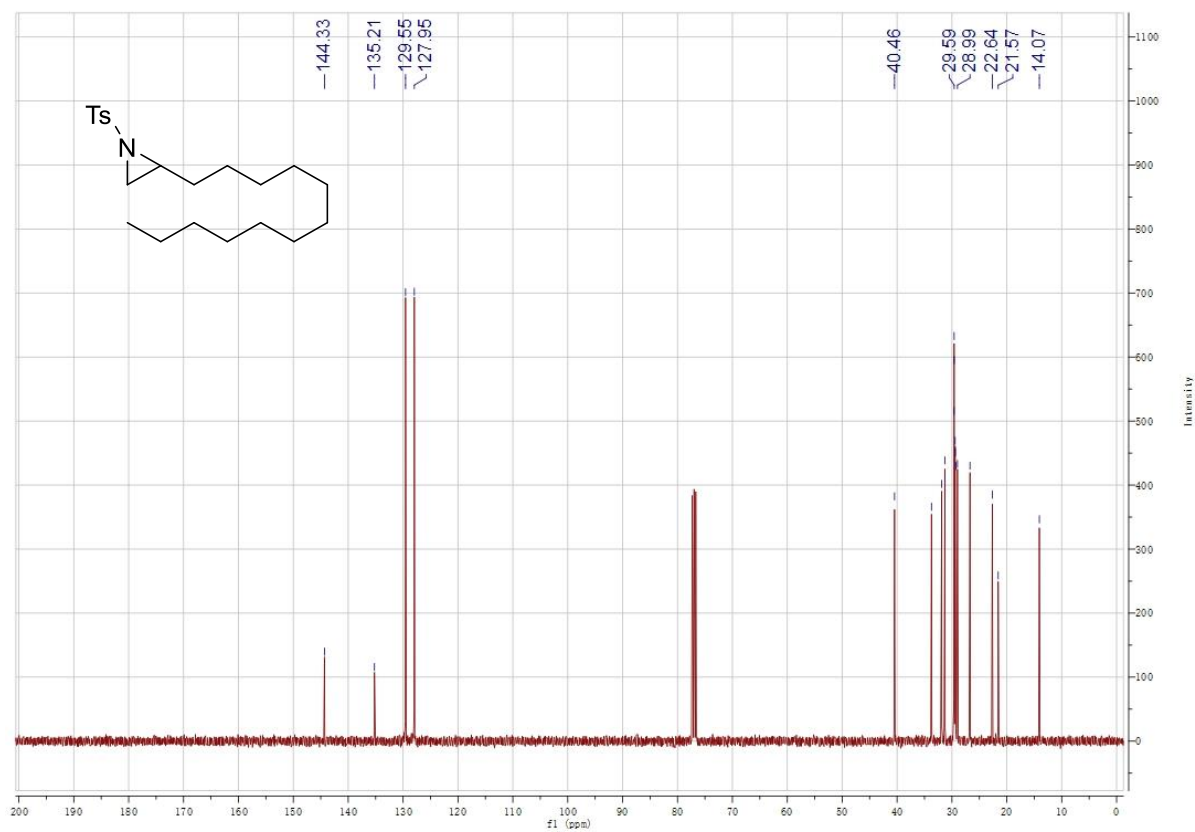

**Supplementary Figure 104. 2-(3-Methylbenzyl)-1-tosylaziridine (23e)**

<sup>1</sup>H NMR (400 MHz, 293 K, CDCl<sub>3</sub>)

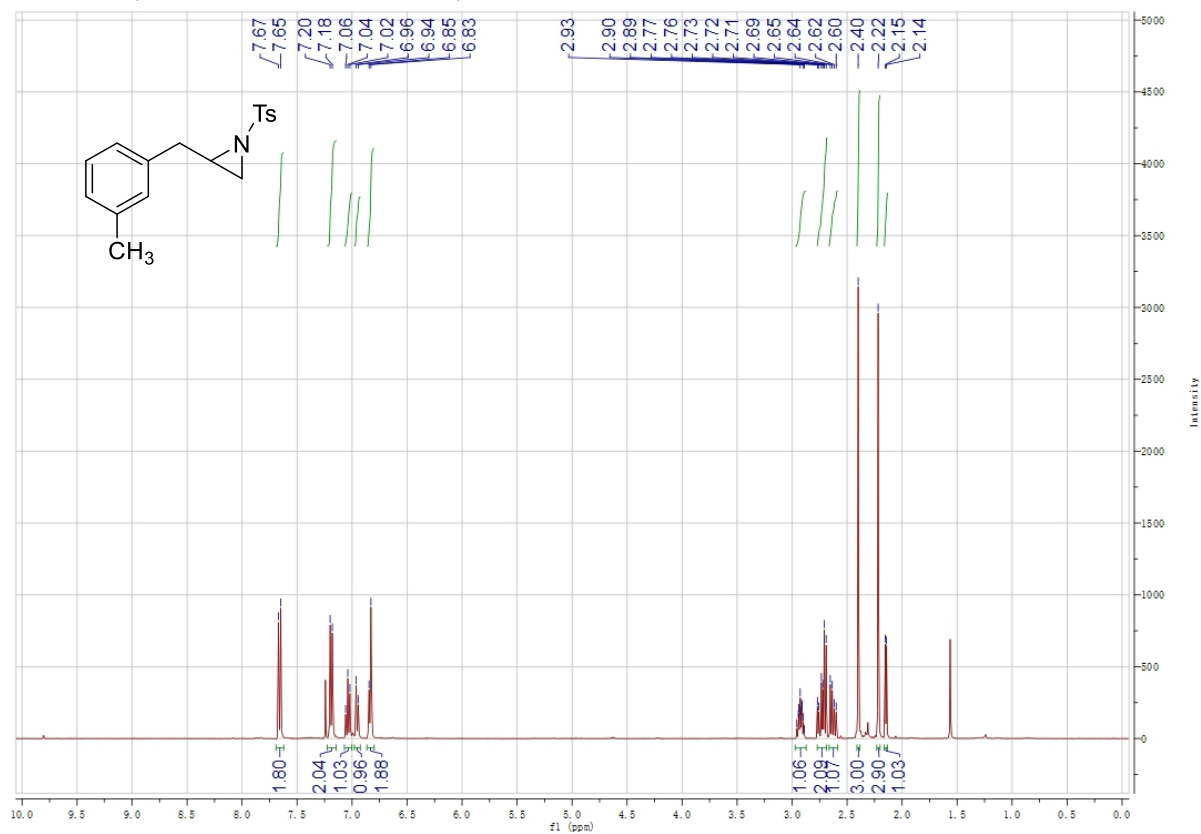

<sup>13</sup>C NMR (101 MHz, 293 K, CDCl<sub>3</sub>)

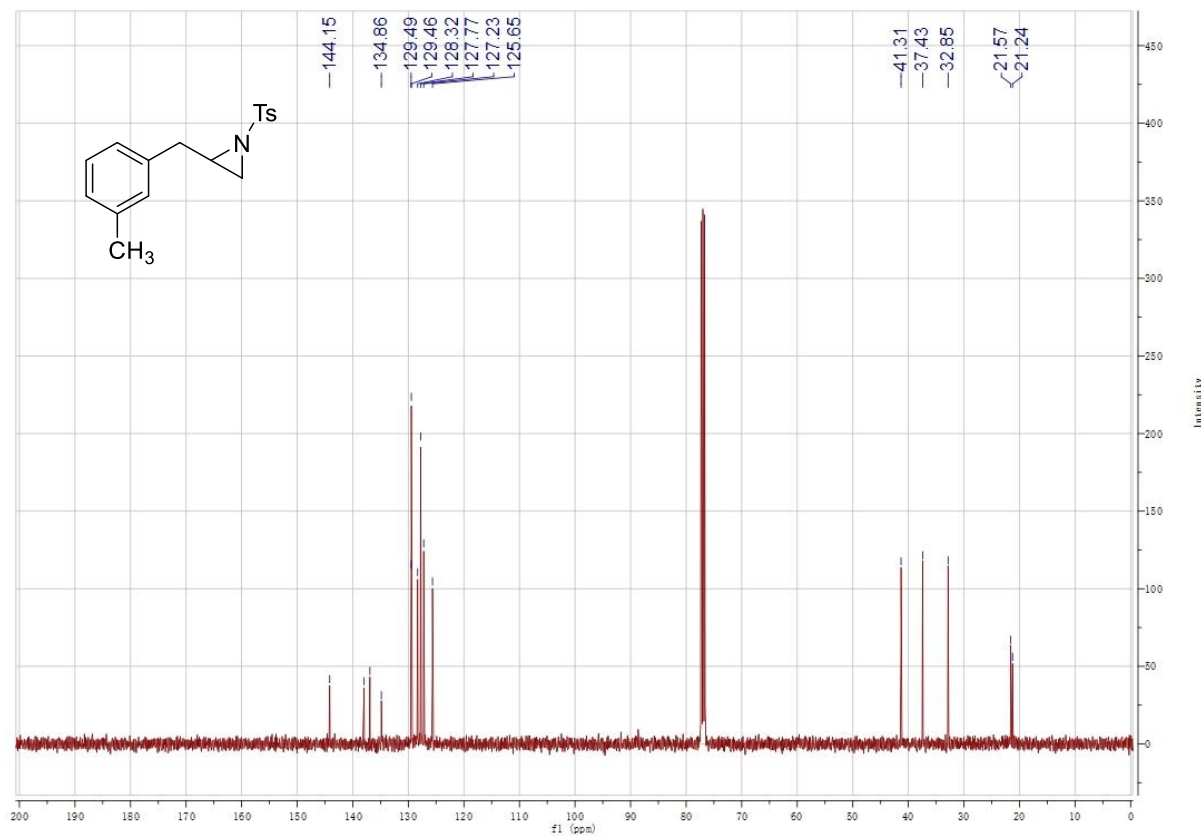



**Supplementary Figure 105. 2-Phenethyl-1-tosylaziridine (23f)**

<sup>1</sup>H NMR (400 MHz, 293 K, CDCl<sub>3</sub>)

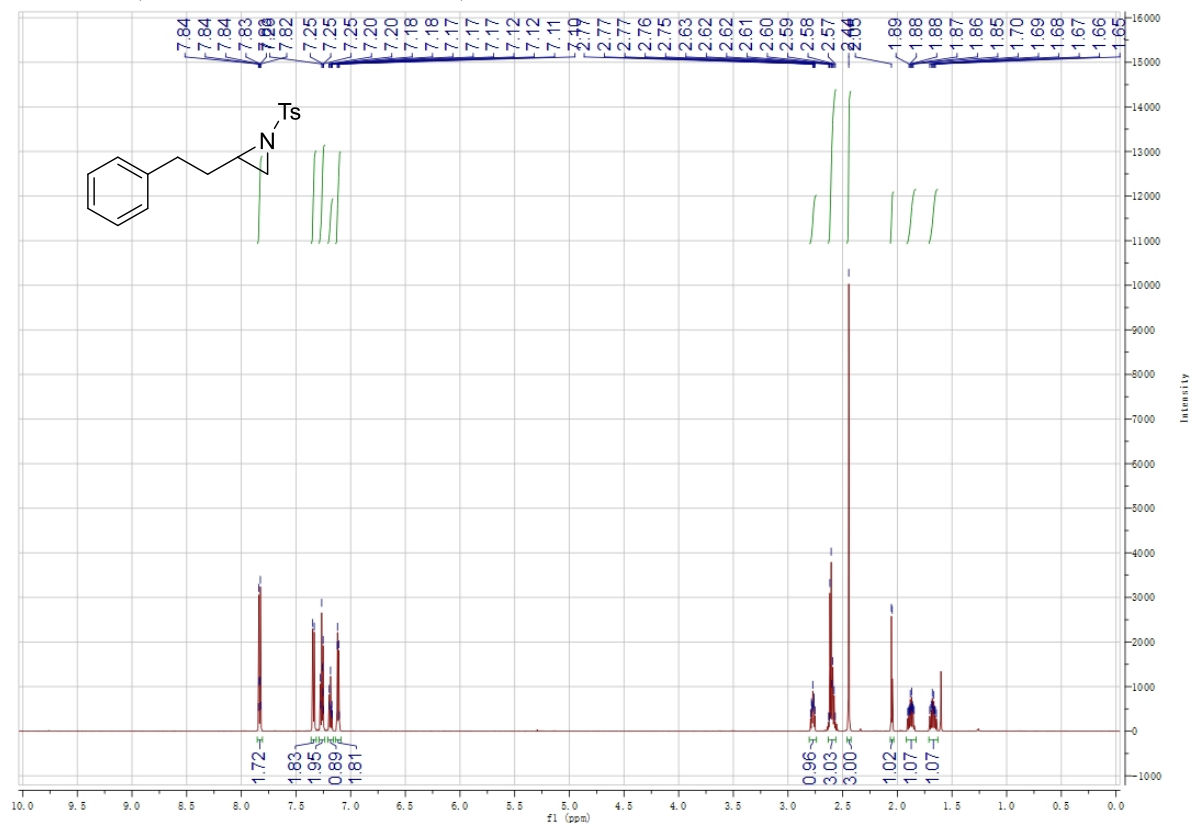

<sup>13</sup>C NMR (101 MHz, 293 K, CDCl<sub>3</sub>)

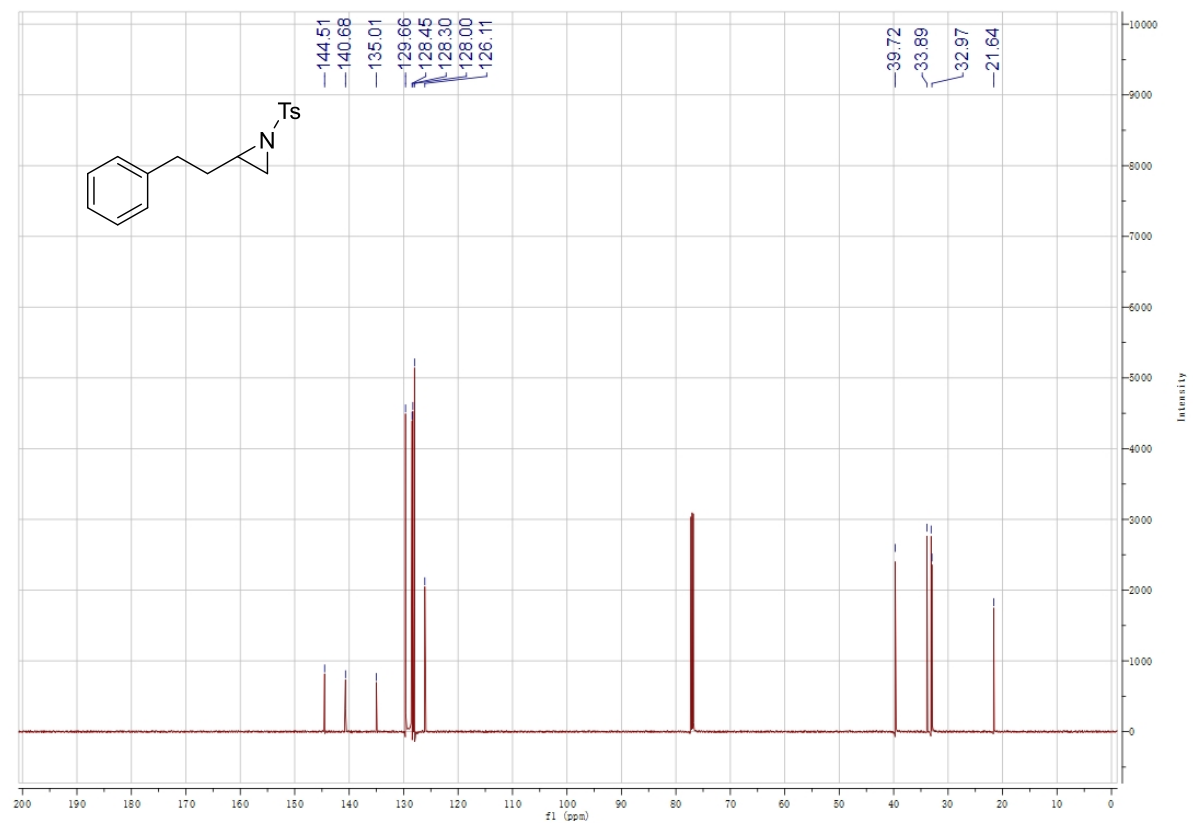

**Supplementary Figure 106. 6-Tosyl-6-azabicyclo[3.1.0]hexane (23g)**

<sup>1</sup>H NMR (400 MHz, 293 K, CDCl<sub>3</sub>)

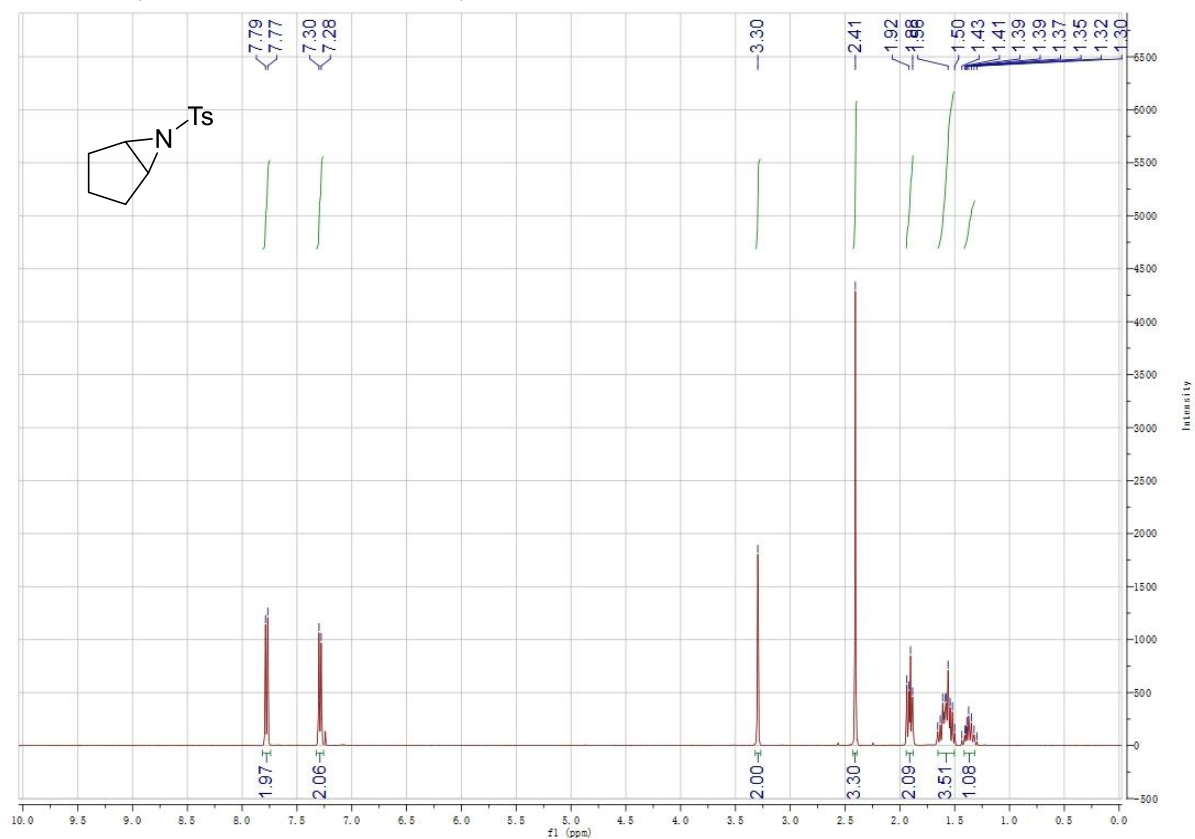

<sup>13</sup>C NMR (101 MHz, 293 K, CDCl<sub>3</sub>)

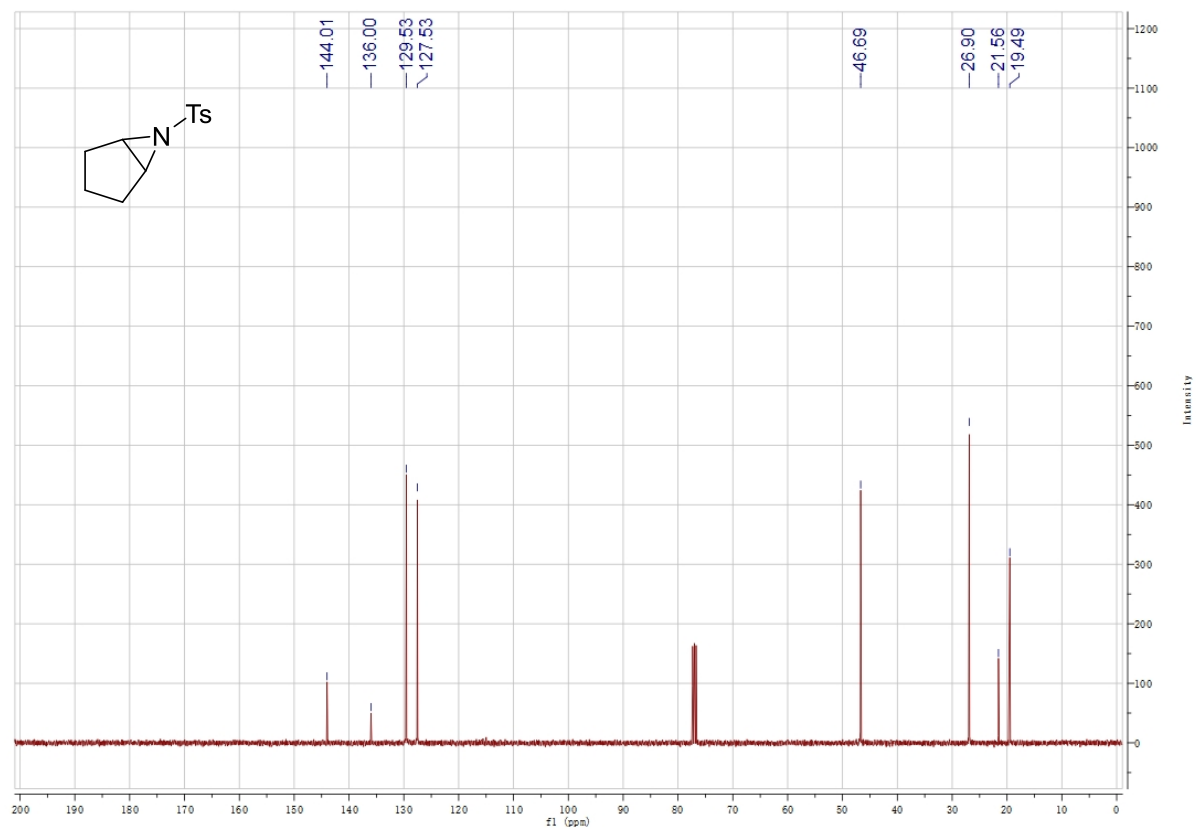

### Supplementary Figure 107.

Methyl (1*R*,3*R*,6*S*)-7-tosyl-7-azabicyclo[4.1.0]heptane-3-carboxylate (**23h**)

<sup>1</sup>H NMR (400 MHz, 293 K, CDCl<sub>3</sub>)

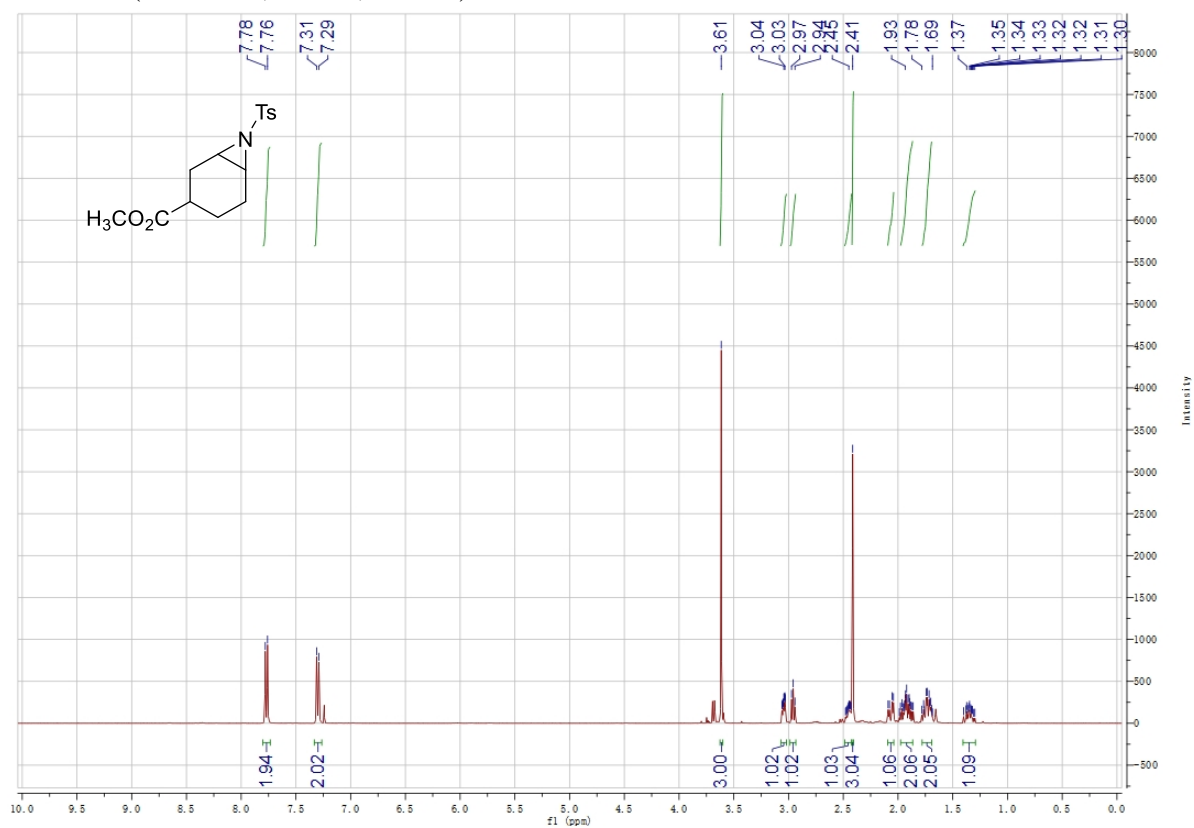

<sup>13</sup>C NMR (101 MHz, 293 K, CDCl<sub>3</sub>)

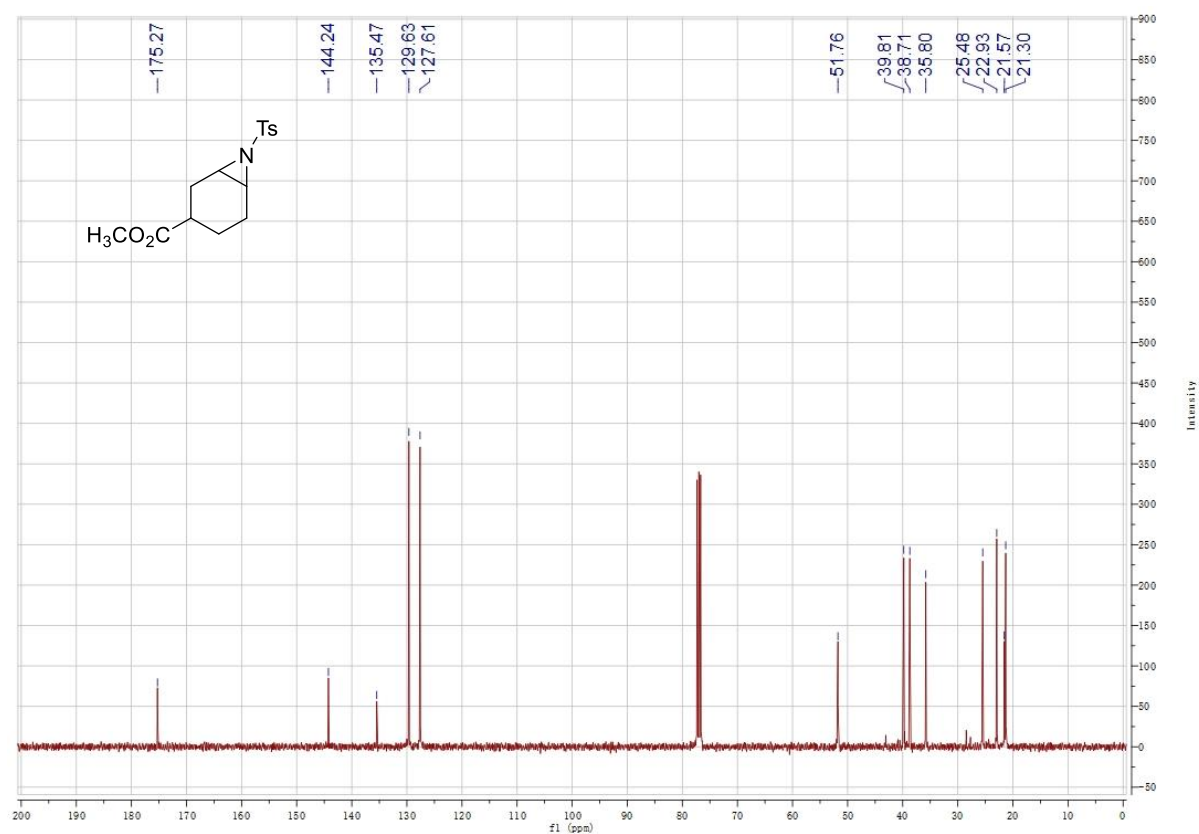

**Supplementary Figure 108.** (2Z,4Z,6Z)-9-Tosyl-9-azabicyclo[6.1.0]nona-2,4,6-triene (**23i**)  
<sup>1</sup>H NMR (400 MHz, 293 K, CDCl<sub>3</sub>)

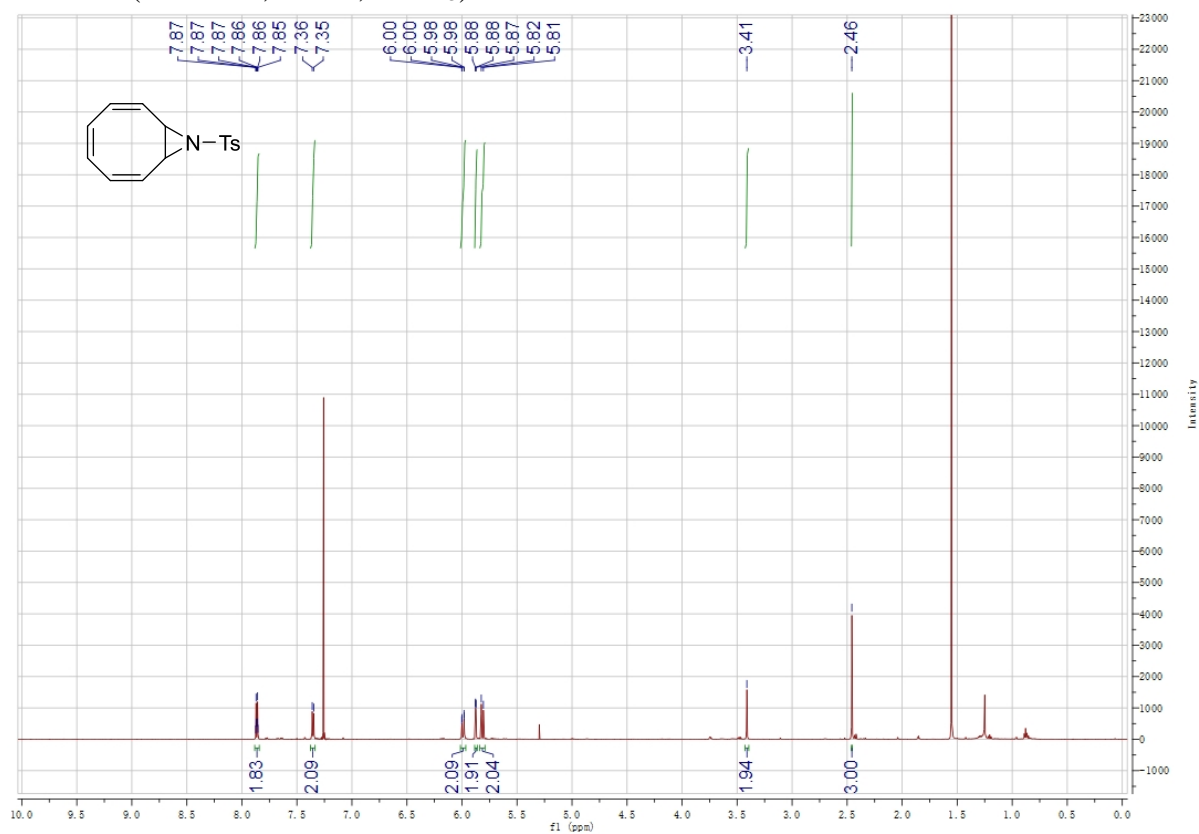

<sup>13</sup>C NMR (101 MHz, 293 K, CDCl<sub>3</sub>)

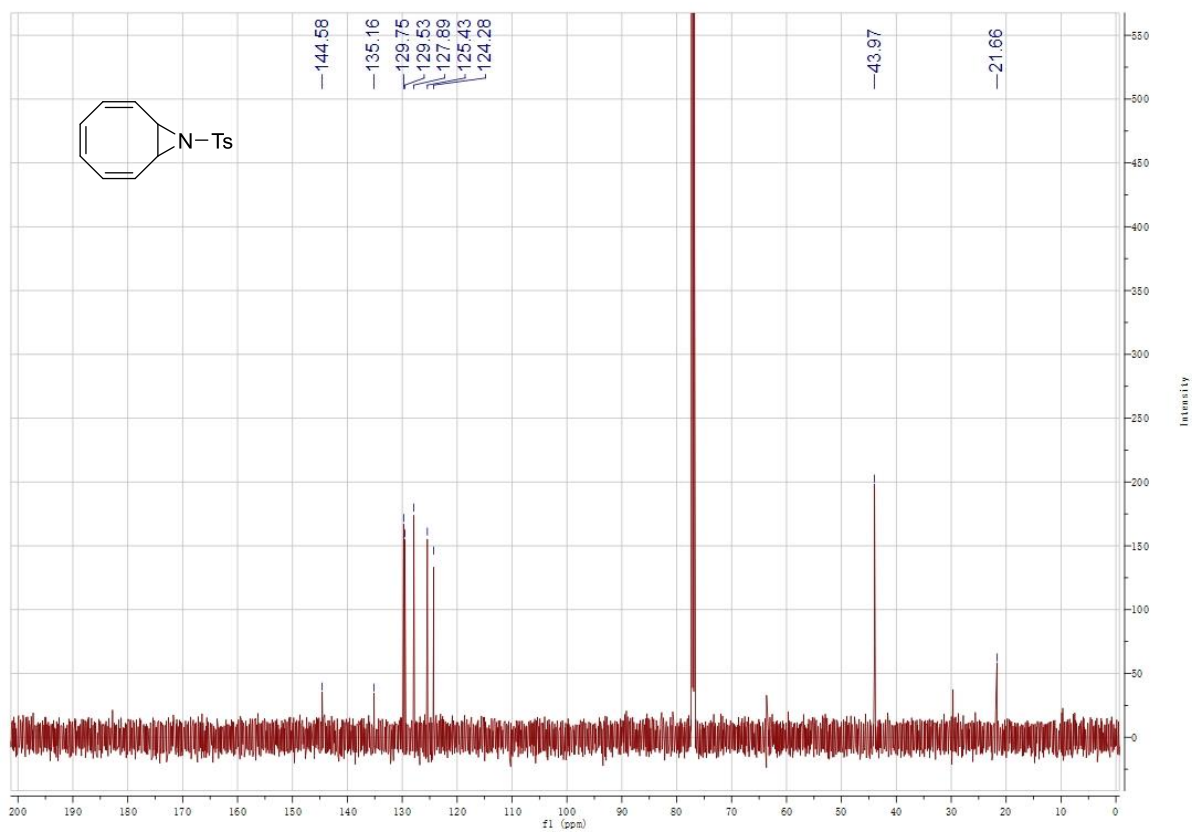

## Supplementary References

- [1] Yamada, Y.; Yamamoto, T. & Okawara, M. Synthesis and Reaction of New type I - N ylide, N-Tosyliminoiodinane. *Chem. Lett.*, **4**, 361-362 (1975).
- [2] Yoshimura, A.; Luedtkeand, M. W. & Zhdankin, V. V. (Tosylimino)phenyl- $\lambda^3$ -iodane as a Reagent for the Synthesis of Methyl Carbamates via Hofmann Rearrangement of Aromatic and Aliphatic Carboxamides. *J. Org. Chem.* **77**, 2087-2091 (2012).
- [3] Coote, S. C.; Moore, S. P.; O'Brien, P.; Whitwood, A. C. & Gilday, J. Organolithium-Mediated Conversion of  $\beta$ -Alkoxy Aziridines into Allylic Sulfonamides: Effect of the N-Sulfonyl Group and a Formal Synthesis of ( $\pm$ )-Perhydrohistrionicotoxin. *J. Org. Chem.* **73**, 7852-7855 (2008).
- [4] *Gaussian 16, Revision C.01*, Frisch, M. J. et al. Gaussian, Inc., Wallingford CT, 2019.
- [5] Zhao, Y. & Truhlar, D. G. The M06 suite of density functionals for main group thermochemistry, thermochemical kinetics, noncovalent interactions, excited states, and transition elements: two new functionals and systematic testing of four M06-class functionals and 12 other functionals. *Theor. Chem. Acc.* **120**, 215-241 (2008).
- [6] Grimme, S.; Antony, J.; Ehrlich, S. & Krieg, H. A consistent and accurate *ab initio* parametrization of density functional dispersion correction (DFT-D) for the 94 elements H-Pu. *J. Chem. Phys.* **132**, 154104 (2010).
- [7] Weigend, F. & Ahlrichs, R. Balanced basis sets of split valence, triple zeta valence and quadruple zeta valence quality for H to Rn: Design and assessment of accuracy. *Phys. Chem. Chem. Phys.* **7**, 3297-3305 (2005).
- [8] (a) Fukui, K. Formulation of the Reaction Coordinate. *J. Phys. Chem.* **74**, 4161-4163 (1970). (b) Fukui, K. The Path of Chemical Reactions - the IRC Approach. *Acc. Chem. Res.* **14**, 363-368 (1981).
- [9] Marenich, A. V.; Cramer, C. J. & Truhlar, D. G. Universal Solvation Model Based on Solute Electron Density and on a Continuum Model of the Solvent Defined by the Bulk Dielectric Constant and Atomic Surface Tensions. *J. Phys. Chem. B* **113**, 6378-6396 (2009).
- [10] CYLview20; Legault, C. Y. Université de Sherbrooke, 2020, (<http://www.cylview.org>).
- [11] Marcus, R. A. On the Theory of Oxidation-Reduction Reactions Involving Electron Transfer. I. *J. Chem. Phys.* **24**, 966-978 (1956).
- [12] Lu, T. & Chen, F. Multiwfn: a multifunctional wavefunction analyzer. *J. Comput. Chem.* **33**, 580-592 (2012).
